# Supplementary material
Source: publisher site journal article supplement (https://www.dovepress.com/get_supplementary_file.php?f=189784.xlsx)
Supplement: Supplementary file 1 [file get_supplementary_file.php]

## Sheet: TABLE S1
Sample data of GSE18520
Sample ID	Title	Source name	Tissue	Tumor stage	Tumor grade	Surv data
GSM461348	Ovarian Tumor, 317	papillary serous ovarian adenocarcinoma	papillary serous ovarian adenocarcinoma	late	high	150 (A)
GSM461349	Ovarian Tumor, 332	papillary serous ovarian adenocarcinoma	papillary serous ovarian adenocarcinoma	late	high	7
GSM461350	Ovarian Tumor, 349	papillary serous ovarian adenocarcinoma	papillary serous ovarian adenocarcinoma	late	high	144 (A)
GSM461351	Ovarian Tumor, 351	papillary serous ovarian adenocarcinoma	papillary serous ovarian adenocarcinoma	late	high	142 (A)
GSM461352	Ovarian Tumor, 386	papillary serous ovarian adenocarcinoma	papillary serous ovarian adenocarcinoma	late	high	95
GSM461353	Ovarian Tumor, 388	papillary serous ovarian adenocarcinoma	papillary serous ovarian adenocarcinoma	late	high	132 (A)
GSM461354	Ovarian Tumor, 389	papillary serous ovarian adenocarcinoma	papillary serous ovarian adenocarcinoma	late	high	13
GSM461355	Ovarian Tumor, 402	papillary serous ovarian adenocarcinoma	papillary serous ovarian adenocarcinoma	late	high	8
GSM461356	Ovarian Tumor, 410	papillary serous ovarian adenocarcinoma	papillary serous ovarian adenocarcinoma	late	high	150 (A)
GSM461357	Ovarian Tumor, 412	papillary serous ovarian adenocarcinoma	papillary serous ovarian adenocarcinoma	late	high	113
GSM461358	Ovarian Tumor, 434	papillary serous ovarian adenocarcinoma	papillary serous ovarian adenocarcinoma	late	high	72
GSM461359	Ovarian Tumor, 467	papillary serous ovarian adenocarcinoma	papillary serous ovarian adenocarcinoma	late	high	11
GSM461360	Ovarian Tumor, 629	papillary serous ovarian adenocarcinoma	papillary serous ovarian adenocarcinoma	late	high	50 (A)
GSM461361	Ovarian Tumor, 702	papillary serous ovarian adenocarcinoma	papillary serous ovarian adenocarcinoma	late	high	13
GSM461362	Ovarian Tumor, 714	papillary serous ovarian adenocarcinoma	papillary serous ovarian adenocarcinoma	late	high	8
GSM461363	Ovarian Tumor, 765	papillary serous ovarian adenocarcinoma	papillary serous ovarian adenocarcinoma	late	high	12
GSM461364	Ovarian Tumor, 780	papillary serous ovarian adenocarcinoma	papillary serous ovarian adenocarcinoma	late	high	11
GSM461365	Ovarian Tumor, 799	papillary serous ovarian adenocarcinoma	papillary serous ovarian adenocarcinoma	late	high	5
GSM461366	Ovarian Tumor, 872	papillary serous ovarian adenocarcinoma	papillary serous ovarian adenocarcinoma	late	high	9
GSM461367	Ovarian Tumor, 1231	papillary serous ovarian adenocarcinoma	papillary serous ovarian adenocarcinoma	late	high	15
GSM461368	Ovarian Tumor, 1562	papillary serous ovarian adenocarcinoma	papillary serous ovarian adenocarcinoma	late	high	19 (A)
GSM461369	Ovarian Tumor, 1660	papillary serous ovarian adenocarcinoma	papillary serous ovarian adenocarcinoma	late	high	15 (A)
GSM461370	Ovarian Tumor, 662	papillary serous ovarian adenocarcinoma	papillary serous ovarian adenocarcinoma	late	high	23
GSM461371	Ovarian Tumor, 800	papillary serous ovarian adenocarcinoma	papillary serous ovarian adenocarcinoma	late	high	36
GSM461372	Ovarian Tumor, 934	papillary serous ovarian adenocarcinoma	papillary serous ovarian adenocarcinoma	late	high	36 (A)
GSM461373	Ovarian Tumor, 324	papillary serous ovarian adenocarcinoma	papillary serous ovarian adenocarcinoma	late	high	59
GSM461374	Ovarian Tumor, 377	papillary serous ovarian adenocarcinoma	papillary serous ovarian adenocarcinoma	late	high	12
GSM461375	Ovarian Tumor, 380	papillary serous ovarian adenocarcinoma	papillary serous ovarian adenocarcinoma	late	high	57
GSM461376	Ovarian Tumor, 396	papillary serous ovarian adenocarcinoma	papillary serous ovarian adenocarcinoma	late	high	21
GSM461377	Ovarian Tumor, 443	papillary serous ovarian adenocarcinoma	papillary serous ovarian adenocarcinoma	late	high	111
GSM461378	Ovarian Tumor, 744	papillary serous ovarian adenocarcinoma	papillary serous ovarian adenocarcinoma	late	high	14
GSM461379	Ovarian Tumor, 312	papillary serous ovarian adenocarcinoma	papillary serous ovarian adenocarcinoma	late	high	48
GSM461380	Ovarian Tumor, 321	papillary serous ovarian adenocarcinoma	papillary serous ovarian adenocarcinoma	late	high	45
GSM461381	Ovarian Tumor, 367	papillary serous ovarian adenocarcinoma	papillary serous ovarian adenocarcinoma	late	high	16
GSM461382	Ovarian Tumor, 394	papillary serous ovarian adenocarcinoma	papillary serous ovarian adenocarcinoma	late	high	16
GSM461383	Ovarian Tumor, 477	papillary serous ovarian adenocarcinoma	papillary serous ovarian adenocarcinoma	late	high	21
GSM461384	Ovarian Tumor, 656	papillary serous ovarian adenocarcinoma	papillary serous ovarian adenocarcinoma	late	high	25
GSM461385	Ovarian Tumor, 694	papillary serous ovarian adenocarcinoma	papillary serous ovarian adenocarcinoma	late	high	33
GSM461386	Ovarian Tumor, 715	papillary serous ovarian adenocarcinoma	papillary serous ovarian adenocarcinoma	late	high	33
GSM461387	Ovarian Tumor, 786	papillary serous ovarian adenocarcinoma	papillary serous ovarian adenocarcinoma	late	high	48 (A)
GSM461388	Ovarian Tumor, 794	papillary serous ovarian adenocarcinoma	papillary serous ovarian adenocarcinoma	late	high	15
GSM461389	Ovarian Tumor, 970	papillary serous ovarian adenocarcinoma	papillary serous ovarian adenocarcinoma	late	high	18
GSM461390	Ovarian Tumor, 1109	papillary serous ovarian adenocarcinoma	papillary serous ovarian adenocarcinoma	late	high	34 (A)
GSM461391	Ovarian Tumor, 1214	papillary serous ovarian adenocarcinoma	papillary serous ovarian adenocarcinoma	late	high	17
GSM461392	Ovarian Tumor, 345	papillary serous ovarian adenocarcinoma	papillary serous ovarian adenocarcinoma	late	high	18
GSM461393	Ovarian Tumor, 358	papillary serous ovarian adenocarcinoma	papillary serous ovarian adenocarcinoma	late	high	21
GSM461394	Ovarian Tumor, 461	papillary serous ovarian adenocarcinoma	papillary serous ovarian adenocarcinoma	late	high	32
GSM461395	Ovarian Tumor, 486	papillary serous ovarian adenocarcinoma	papillary serous ovarian adenocarcinoma	late	high	21
GSM461396	Ovarian Tumor, 631	papillary serous ovarian adenocarcinoma	papillary serous ovarian adenocarcinoma	late	high	30
GSM461397	Ovarian Tumor, 692	papillary serous ovarian adenocarcinoma	papillary serous ovarian adenocarcinoma	late	high	35
GSM461398	Ovarian Tumor, 718	papillary serous ovarian adenocarcinoma	papillary serous ovarian adenocarcinoma	late	high	26
GSM461399	Ovarian Tumor, 778	papillary serous ovarian adenocarcinoma	papillary serous ovarian adenocarcinoma	late	high	16
GSM461400	Ovarian Tumor, 1993	papillary serous ovarian adenocarcinoma	papillary serous ovarian adenocarcinoma	late	high	11 (A)
GSM462643	Normal Ovary, 2008	normal ovarian surface epithelium (OSE)	ovarian surface epithelium (OSE)
GSM462644	Normal Ovary, 2061	normal ovarian surface epithelium (OSE)	ovarian surface epithelium (OSE)
GSM462645	Normal Ovary, 2064	normal ovarian surface epithelium (OSE)	ovarian surface epithelium (OSE)
GSM462646	Normal Ovary, 2085	normal ovarian surface epithelium (OSE)	ovarian surface epithelium (OSE)
GSM462647	Normal Ovary, 2225	normal ovarian surface epithelium (OSE)	ovarian surface epithelium (OSE)
GSM462648	Normal Ovary, 2226	normal ovarian surface epithelium (OSE)	ovarian surface epithelium (OSE)
GSM462649	Normal Ovary, 2228	normal ovarian surface epithelium (OSE)	ovarian surface epithelium (OSE)
GSM462650	Normal Ovary, 2230	normal ovarian surface epithelium (OSE)	ovarian surface epithelium (OSE)
GSM462651	Normal Ovary, 2234	normal ovarian surface epithelium (OSE)	ovarian surface epithelium (OSE)
GSM462652	Normal Ovary, 2237	normal ovarian surface epithelium (OSE)	ovarian surface epithelium (OSE)
Sample data of GSE27651
Sample ID	Title	Source name	Tissue
GSM370103	LMP459	Laser-capture microdissected tumor cells	low-malignant tumors of the ovary
GSM370104	LMP494	Laser-capture microdissected tumor cells	low-malignant tumors of the ovary
GSM370105	LMP834	Laser-capture microdissected tumor cells	low-malignant tumors of the ovary
GSM370106	LMP1102	Laser-capture microdissected tumor cells	low-malignant tumors of the ovary
GSM370107	LMP1779	Laser-capture microdissected tumor cells	low-malignant tumors of the ovary
GSM370108	LMP1868	Laser-capture microdissected tumor cells	low-malignant tumors of the ovary
GSM370109	LMP1911	Laser-capture microdissected tumor cells	low-malignant tumors of the ovary
GSM370110	LMP2082	Laser-capture microdissected tumor cells	low-malignant tumors of the ovary
GSM370387	LGOSC70	Laser-capture microdissected tumor cells	low-grade ovarian serous carcinoma
GSM370388	LGOSC94	Laser-capture microdissected tumor cells	low-grade ovarian serous carcinoma
GSM370389	LGOSC129	Laser-capture microdissected tumor cells	low-grade ovarian serous carcinoma
GSM370390	LGOSC136	Laser-capture microdissected tumor cells	low-grade ovarian serous carcinoma
GSM370391	LGOSC150	Laser-capture microdissected tumor cells	low-grade ovarian serous carcinoma
GSM370392	LGOSC183	Laser-capture microdissected tumor cells	low-grade ovarian serous carcinoma
GSM370687	LGOSC627	Laser-capture microdissected tumor cells	low-grade ovarian serous carcinoma
GSM370688	LGOSC333	Laser-capture microdissected tumor cells	low-grade ovarian serous carcinoma
GSM370689	LGOSC279	Laser-capture microdissected tumor cells	low-grade ovarian serous carcinoma
GSM370690	LGOSC231	Laser-capture microdissected tumor cells	low-grade ovarian serous carcinoma
GSM370898	LGOSC218	Laser-capture microdissected tumor cells	low-grade ovarian serous carcinoma
GSM370905	LGOSC226	Laser-capture microdissected tumor cells	low-grade ovarian serous carcinoma
GSM370906	LGOSC131	Laser-capture microdissected tumor cells	low-grade ovarian serous carcinoma
GSM371112	HGOSC957	Laser-capture microdissected tumor cells	high-grade ovarian serous carcinoma
GSM371113	HGOSC1109	Laser-capture microdissected tumor cells	high-grade ovarian serous carcinoma
GSM371141	HGOSC1214	Laser-capture microdissected tumor cells	high-grade ovarian serous carcinoma
GSM371142	HGOSC1933	Laser-capture microdissected tumor cells	high-grade ovarian serous carcinoma
GSM371143	HGOSC317A	Laser-capture microdissected tumor cells	high-grade ovarian serous carcinoma
GSM371144	HGOSC324C	Laser-capture microdissected tumor cells	high-grade ovarian serous carcinoma
GSM371145	HGOSC358	Laser-capture microdissected tumor cells	high-grade ovarian serous carcinoma
GSM371146	HGOSC377	Laser-capture microdissected tumor cells	high-grade ovarian serous carcinoma
GSM371642	HGOSC380	Laser-capture microdissected tumor cells	high-grade ovarian serous carcinoma
GSM371643	HGOSC389C	Laser-capture microdissected tumor cells	high-grade ovarian serous carcinoma
GSM371645	HGOSC461	Laser-capture microdissected tumor cells	high-grade ovarian serous carcinoma
GSM371647	HGOSC486	Laser-capture microdissected tumor cells	high-grade ovarian serous carcinoma
GSM371648	HGOSC631	Laser-capture microdissected tumor cells	high-grade ovarian serous carcinoma
GSM371649	HGOSC692	Laser-capture microdissected tumor cells	high-grade ovarian serous carcinoma
GSM371651	HGOSC702	Laser-capture microdissected tumor cells	high-grade ovarian serous carcinoma
GSM371653	HGOSC718	Laser-capture microdissected tumor cells	high-grade ovarian serous carcinoma
GSM371654	HGOSC765	Laser-capture microdissected tumor cells	high-grade ovarian serous carcinoma
GSM371655	HGOSC778	Laser-capture microdissected tumor cells	high-grade ovarian serous carcinoma
GSM371656	HGOSC872	Laser-capture microdissected tumor cells	high-grade ovarian serous carcinoma
GSM372253	HGOSC423	Laser-capture microdissected tumor cells	high-grade ovarian serous carcinoma
GSM372255	HGOSC645	Laser-capture microdissected tumor cells	high-grade ovarian serous carcinoma
GSM372258	HOSE2008	Laser-capture microdissected tumor cells	normal ovarian surface epithelials cells
GSM372259	HOSE2061	Laser-capture microdissected tumor cells	normal ovarian surface epithelials cells
GSM372260	HOSE2064	Laser-capture microdissected tumor cells	normal ovarian surface epithelials cells
GSM372261	HOSE2085	Laser-capture microdissected tumor cells	normal ovarian surface epithelials cells
GSM372262	HOSE2230	Laser-capture microdissected tumor cells	normal ovarian surface epithelials cells
GSM372263	HOSE2237	Laser-capture microdissected tumor cells	normal ovarian surface epithelials cells
GSM372264	HGOSC431	Laser-capture microdissected tumor cells	high-grade ovarian serous carcinoma

## Sheet: TABLE  S2
Renormalized values of all DEGs
id	GSM462643	GSM462644	GSM462645	GSM462646	GSM462647	GSM462648	GSM462649	GSM462650	GSM462651	GSM462652	GSM461348	GSM461349	GSM461350	GSM461351	GSM461352	GSM461353	GSM461354	GSM461355	GSM461356	GSM461357	GSM461358	GSM461359	GSM461360	GSM461361	GSM461362	GSM461363	GSM461364	GSM461365	GSM461366	GSM461367	GSM461368	GSM461369	GSM461370	GSM461371	GSM461372	GSM461373	GSM461374	GSM461375	GSM461376	GSM461377	GSM461378	GSM461379	GSM461380	GSM461381	GSM461382	GSM461383	GSM461384	GSM461385	GSM461386
ITLN1	11.0668	12.7865	8.32912	10.6719	13.5647	13.152	13.1085	13.3373	12.9637	12.6021	6.3533	6.55356	6.53391	6.59461	6.73051	6.66634	6.43238	6.89607	6.66063	6.76036	6.64707	6.59336	6.15387	6.55657	6.35394	6.55799	6.3888	6.63811	6.73552	6.68836	6.12969	6.61005	6.55275	6.47708	6.43379	6.64923	6.54269	7.02226	5.95913	6.60385	6.45791	6.36223	5.93193	6.33803	7.45706	6.50731	6.46139	5.99506	6.12011
LINC01105	7.60668	7.97016	6.96701	7.64761	8.78468	9.16074	8.32339	9.06275	9.40999	8.82068	4.52993	4.61169	4.84797	4.46173	4.76925	4.57005	4.68547	4.72518	4.90353	4.65309	4.83839	4.54059	4.99417	4.48661	4.66252	4.76215	4.79729	4.82291	4.65831	4.78709	4.85453	5.16187	5.472	5.28215	5.09303	4.60397	4.82317	4.69266	3.167	4.86435	5.5166	4.83761	4.88269	5.55334	5.02624	5.40159	4.6917	5.08497	4.99521
ABCA8	8.64056	9.24276	7.78031	8.40202	9.97964	9.95207	9.67972	10.1527	9.87889	9.72085	4.93115	4.93378	5.22187	5.45879	5.0108	5.12201	5.04936	5.14873	5.20859	5.06778	5.19885	5.31492	4.99441	4.94888	4.9427	5.10903	5.04837	4.97992	4.94091	4.93334	4.97182	5.55347	5.23653	5.00878	5.2187	5.13514	5.10824	5.47661	3.41763	5.08992	5.71532	6.56897	5.48583	5.12021	5.40141	6.24183	5.4751	6.32511	5.08003
HAS1	7.3486	8.79074	8.21666	9.94903	10.023	9.9373	8.87508	9.7859	10.3889	7.65654	5.30073	5.44795	5.50576	5.12338	5.30281	5.63878	5.15162	5.38983	5.64879	5.33131	5.18463	5.36562	5.3783	4.86863	5.14093	5.10558	5.43222	5.33737	5.00288	5.27703	5.5484	5.75975	5.97925	5.19808	5.43863	5.13362	5.39514	5.14424	2.11418	5.3687	5.19938	5.4077	5.4553	5.62061	5.60517	7.17278	5.42691	5.45295	5.23207
PDE8B	6.31525	7.27341	7.35495	8.015	7.1696	8.16175	9.12747	7.95778	8.06503	9.24037	4.99843	5.16667	5.39702	5.3716	5.0723	5.19855	5.37106	5.038	5.24128	5.43496	5.45644	5.03693	5.11175	4.97616	4.98439	5.31413	5.12328	5.55031	5.26039	5.23032	5.0957	5.23623	5.94751	5.23673	5.20899	4.97598	5.42492	5.3897	3.72119	5.17917	5.41282	5.2585	5.60071	5.12219	5.03521	6.32169	5.15308	6.02045	5.35
HAND2-AS1	6.45828	6.6792	6.78919	7.20902	8.20174	8.38499	8.86604	8.69764	7.93584	8.24406	4.36118	4.2165	4.44753	4.8897	4.51271	4.54047	4.50056	4.17567	4.52967	4.35377	4.39219	5.68785	4.28649	4.05299	4.97161	5.40148	4.66028	4.99064	4.6523	4.57692	4.61648	4.67505	4.89861	4.31342	4.45574	4.25814	4.41919	4.16979	2.51587	4.77572	4.63673	5.15926	4.29378	4.80889	4.81848	5.41048	4.12958	5.13211	4.61625
PRSS35	8.8382	8.20626	8.5915	7.90902	7.18356	9.51714	7.61357	7.76735	7.10134	8.91531	3.99624	3.78791	3.82468	5.50113	3.93445	3.45648	3.33769	4.56196	3.52065	3.60846	3.96402	4.13313	3.27779	2.79394	4.34351	3.66544	3.79768	3.4646	3.15174	3.44223	3.92629	3.47074	3.83739	3.70705	3.74886	3.22756	3.28192	3.4741	1.27063	3.08279	4.33025	7.26191	5.23018	3.69711	4.28328	5.28158	3.70073	4.35846	4.54887
PEX5L	8.35949	8.97331	8.3199	8.40975	7.22499	7.47885	7.10466	7.70874	6.95855	7.58074	4.37334	4.38426	4.6594	4.47386	5.15099	4.47908	4.46726	4.34203	4.63877	4.28861	4.5329	4.25727	4.4004	4.36309	4.39979	4.22406	4.63044	4.90551	4.50983	4.68646	4.98541	5.08605	4.50208	4.38413	5.08966	4.40378	5.02149	4.31229	2.36558	4.5457	4.65682	4.49581	4.60782	4.97778	4.81097	5.2874	4.47838	5.18047	4.38017
GADL1	6.94166	6.23578	7.67358	7.79353	7.16218	8.62534	8.00134	7.70594	9.29962	10.0692	5.03469	4.69206	4.96322	5.70089	5.35097	4.6077	4.64479	5.58149	4.88098	4.88734	5.13626	4.80778	4.42829	4.19893	4.9249	4.8291	4.91314	4.93617	4.49133	4.82049	4.92177	4.84215	4.17696	4.31599	4.24296	4.60339	4.61848	4.63923	3.60628	3.77266	4.92736	5.28615	4.5276	4.81624	4.47017	4.60581	4.26316	4.51201	4.49143
CHGB	8.43519	9.99359	7.88834	7.93022	7.64849	10.0631	7.74267	8.17497	9.21002	9.34712	4.7463	5.55054	4.68562	4.87235	4.91733	5.41354	4.86633	4.73063	4.9687	4.90671	5.05673	5.41128	4.66202	4.47123	4.35332	4.68421	4.70835	4.62377	4.49566	4.60819	5.09731	5.24822	5.12415	4.71928	4.46974	5.08527	4.52232	4.7928	3.89667	4.57608	5.566	7.48665	5.19504	4.87036	5.49862	6.27571	5.35056	5.40919	5.36378
SYT4	9.11128	8.55309	7.80813	9.04022	10.3685	9.79145	8.41289	10.4505	10.3864	7.02812	6.35137	6.0636	6.16355	6.2889	6.73187	6.14878	6.01025	6.34442	6.24657	6.268	6.49122	6.1848	5.75149	5.64836	5.97408	6.32867	6.34441	6.26797	5.87027	6.3237	5.75039	5.89932	5.59841	5.8132	5.69292	5.8961	5.92512	6.02771	5.23142	5.63891	5.88239	5.9199	5.57369	4.93689	5.6181	5.91853	5.74389	5.68	5.83548
AADACL2	7.52596	6.71355	8.04157	7.85224	6.79288	7.00071	7.44644	7.39339	7.51003	9.25689	4.72446	4.50015	4.51613	4.84513	3.9732	4.17581	4.89645	4.58504	4.86498	4.35505	4.54957	4.39233	3.78479	4.23111	6.69918	3.9403	4.90635	4.25927	4.1514	4.09792	4.72974	4.14394	4.47877	4.39123	4.57526	4.65307	4.46272	4.47107	2.01672	4.63169	3.94239	3.47876	5.5404	3.9966	3.92753	4.47492	4.55749	4.01543	4.18988
DIRAS3	9.15527	9.73445	8.67612	9.07528	9.2411	9.93753	8.68096	9.83618	11.1066	10.2177	5.57204	5.55517	5.11745	5.82457	5.19092	5.21319	5.26851	5.59946	5.67599	5.18037	6.45124	6.09458	4.59781	4.6567	5.4255	5.70442	5.7556	5.39786	5.42481	5.97187	5.37513	4.92393	5.44806	5.50612	5.11493	6.23272	5.66369	4.82409	3.8298	4.46626	5.0744	7.42282	5.52357	4.38444	5.24367	6.11906	5.23151	5.23143	5.43189
AOX1	8.65386	8.99707	8.0641	8.3422	10.4088	10.2142	10.4994	10.4171	9.72129	9.71173	6.44091	7.36624	7.10625	6.51027	6.53301	7.01119	6.54204	6.66088	6.89269	6.1394	6.75211	6.8256	6.83705	6.18058	6.77249	6.32947	7.19067	6.93027	6.24609	6.76918	7.25438	6.84821	7.14089	6.99806	6.72213	6.10029	6.22168	6.00545	4.43111	6.7362	6.96432	6.87327	6.954	7.11106	7.70348	7.80656	6.70296	7.21479	7.01526
HBB	8.67138	7.8785	11.4962	10.4996	13.207	13.0832	13.281	12.9411	11.129	13.0727	7.09679	6.91862	7.20038	7.07689	6.98631	7.52124	7.13212	7.02021	7.79359	7.20029	7.016	7.00553	7.17964	8.27988	8.86678	7.19293	7.24797	7.28567	6.8796	7.27087	8.68831	7.72276	7.33877	7.31243	7.32856	6.96271	7.38877	7.00056	6.34282	7.18065	7.39451	7.35265	7.29907	7.83703	7.31354	9.24899	7.47988	7.10543	7.15576
BCHE	8.95981	7.20359	8.39823	8.87637	11.76	11.6257	12.0737	12.0384	10.5239	10.1521	4.82811	4.6816	4.97102	5.65691	5.06144	4.6367	4.39036	4.95967	5.03254	5.1435	5.05819	4.62006	4.1081	4.15796	5.24802	4.77086	5.11984	4.96375	4.79284	5.02908	6.10191	5.73642	5.80221	4.47233	5.0471	4.28912	4.31511	4.3611	2.3087	3.85674	4.35212	5.01148	4.35795	5.47139	4.58225	5.4531	6.21382	8.47686	4.6172
NPY1R	9.16802	8.04639	8.87639	9.63798	10.3427	9.91359	10.8009	10.6941	10.7229	10.8196	4.47073	4.62477	4.97663	5.36796	4.84889	4.07231	4.47242	5.1183	4.87179	4.90803	5.44717	4.76868	4.21002	4.70393	4.43252	6.59778	5.78681	4.37418	4.97533	5.71	4.24005	7.47802	4.53242	4.37843	5.78507	3.98148	3.75364	4.17007	3.45942	3.89191	4.21452	4.42998	4.18589	4.51061	5.45969	4.12998	5.96305	5.89669	4.93834
PRG4	7.49282	6.76812	7.97472	8.91398	9.27589	9.32757	9.7877	11.4677	8.87735	7.27086	5.33003	4.80866	5.69702	5.56522	4.98693	4.81475	5.11015	4.69197	4.93108	5.04224	5.28501	5.29707	4.74855	4.88374	5.3041	5.10774	4.87492	5.75133	4.99168	5.11517	6.04243	5.4682	5.24175	5.22278	4.93794	5.13682	5.20283	5.05729	3.31929	5.78132	5.62908	4.68773	5.42754	6.18955	5.44977	4.94654	5.57243	5.80801	4.79102
ADH1C	7.37675	6.83142	6.76093	7.86965	8.18603	8.38082	9.56874	7.8446	6.76642	8.25536	4.4968	4.61451	5.11588	4.81799	4.43543	4.77974	4.67709	4.42842	4.18777	4.73416	5.37481	4.86098	4.71682	4.66696	4.35474	4.88053	4.75745	4.6001	4.3641	4.55505	5.58336	5.10527	5.394	4.13964	4.90063	4.47695	4.87804	5.10988	0.662681	4.92763	4.13788	4.72557	5.06627	4.72541	4.85362	5.56718	4.98403	5.1857	4.93314
KDR	9.22771	9.32242	8.71067	9.32253	10.2296	10.3678	10.2952	11.1225	10.7713	9.96153	6.68723	6.81562	6.31151	8.28915	6.47983	6.80045	8.50418	6.99923	7.98032	6.82751	7.43808	6.13574	6.15249	6.05047	8.06401	6.52649	6.34342	6.83083	6.45826	6.80872	6.89107	6.55243	6.77937	6.54702	7.28835	5.61374	6.15818	6.0746	5.92274	5.54439	6.65637	7.1654	6.29509	8.10303	6.32173	6.03265	7.71917	7.36779	6.39612
B3GALT2	5.90509	6.11724	5.95356	5.84591	6.04562	6.88742	7.62894	7.23596	6.81989	6.80964	4.12927	3.6638	3.80538	3.78663	3.33931	4.88476	3.20332	3.65405	3.28177	3.33548	4.85173	3.36613	3.47237	3.8252	3.32072	3.26055	3.66055	3.54739	3.50451	3.13828	3.79965	3.57294	3.55139	5.41398	3.58914	4.16313	3.30489	3.14944	3.80112	3.57638	4.02388	3.34969	4.45783	3.58071	3.68264	4.62071	4.17684	4.22659	2.75183
PPM1K	8.40595	8.51307	7.67773	8.09195	8.91934	9.75467	8.86162	8.52722	9.19299	10.0883	6.62548	7.19265	6.36623	6.70252	6.56885	6.9172	6.73926	6.63515	6.43174	6.38005	6.77503	6.25746	6.50824	6.56992	7.36819	6.51651	6.85396	6.63482	6.73169	6.6135	7.14514	6.89216	6.40857	6.6083	7.24715	6.96603	6.41036	6.50378	6.07274	6.28657	6.98591	7.27764	6.79768	6.94675	6.85105	7.04201	7.32771	6.98776	6.87603
BNC1	9.42555	10.5894	8.65779	9.22808	11.4904	11.5458	11.3404	11.7149	11.5355	11.4328	4.69289	4.48886	5.02583	4.96753	5.21193	5.60013	5.49744	5.70007	4.96715	4.72512	4.94034	4.98751	4.7385	5.36749	5.78417	4.79302	5.35555	6.181	5.17431	7.57777	6.50143	6.46187	5.7255	5.34041	5.50799	6.39145	5.3739	5.85354	5.37941	5.40082	8.65394	5.45568	5.0364	5.50554	5.37185	6.81615	6.04122	5.88617	4.95996
INMT	6.70172	6.22955	7.27417	6.61418	9.17698	9.30766	9.50289	9.63886	8.35987	8.64997	5.6536	5.55111	6.23751	5.71186	5.53286	5.84334	5.38045	5.69641	5.46554	5.78652	5.72578	5.61289	5.50998	5.31419	5.95595	5.21015	5.62032	5.58847	5.12085	5.47697	5.30738	5.31257	5.58505	5.65551	5.57811	5.76557	5.84196	5.6841	5.97426	5.57773	5.37877	5.71396	4.99203	5.57562	5.53315	5.64452	5.46176	6.37865	5.28217
CLEC4M	9.69281	8.66534	7.88536	8.88817	8.83401	9.38068	6.54784	9.61626	10.5121	9.0848	5.64999	5.59495	5.52419	5.67859	5.47295	5.61455	5.38757	5.86526	5.41537	5.30306	5.68672	5.42579	5.60195	5.29143	5.50361	5.36674	5.54144	5.75773	5.53082	5.50956	5.48859	5.5201	6.07219	5.38464	5.32967	5.41559	5.78582	5.42921	3.18076	5.43082	5.60654	5.73561	5.75149	5.81831	5.5919	6.10916	5.55332	5.89495	5.43336
NDUFV1	8.21921	8.1983	7.92887	8.08132	8.19324	8.22488	8.35894	8.44149	8.63171	8.9507	11.5559	11.4368	10.6121	11.4191	10.8412	10.7603	11.6841	11.2858	10.8872	11.6792	10.921	10.811	10.8782	11.4474	11.1629	11.1639	10.5044	11.2522	11.0752	11.0441	10.6145	10.8888	10.5046	10.7427	10.7107	11.1778	11.1005	11.7791	10.2566	10.9155	10.8488	11.282	10.6986	10.4582	10.7128	10.4307	10.8967	10.6091	10.7024
SNCA	7.90877	8.29362	7.84499	7.8564	8.44114	8.48091	8.86531	8.28552	8.29222	8.7035	6.64044	6.3751	6.25967	7.10223	6.56562	6.34795	6.37776	6.74944	6.55334	6.351	6.69025	6.49839	6.8557	6.11447	6.56945	6.81352	6.35566	6.40327	6.26866	6.2609	6.55188	6.24747	6.06766	6.88539	6.28209	6.3806	6.39739	6.06909	4.68987	6.05749	6.31557	6.88729	6.72502	7.14117	6.72762	6.32943	6.50874	6.59564	6.8046
TCEAL2	9.46035	10.2765	8.95449	9.20943	10.2138	10.6692	10.6103	10.5684	11.0649	10.7625	5.38546	6.13556	5.87776	6.46419	6.52265	6.06763	6.29575	6.31071	5.77128	6.6105	7.20619	6.36765	5.05882	6.05563	5.82282	7.67868	6.71754	5.9358	6.49732	6.07672	5.72564	6.19916	6.44713	6.05875	6.08269	5.68292	8.60269	6.10212	3.85179	5.37173	5.58402	8.85186	6.8782	5.08219	6.37944	6.80692	7.035	7.73398	6.26486
TCEAL7	8.40248	9.32841	8.14925	8.52028	9.12648	9.52965	9.27685	8.82569	9.40757	8.68765	3.95986	3.86441	4.63269	4.25396	4.1564	5.26264	5.4496	4.36279	4.59933	5.36996	4.09745	4.7381	3.54521	3.92414	6.63329	4.25491	5.30511	4.57209	4.34423	4.30116	4.85075	4.89418	5.20815	4.10825	4.60723	4.87265	6.80131	4.20003	2.84037	3.46814	4.88555	6.98006	5.50931	4.64935	4.26222	6.45169	5.28824	6.43976	4.48586
MNDA	10.369	10.0926	8.88305	9.93684	10.8388	11.1763	10.7831	11.1348	11.9312	11.3024	7.70156	7.60207	6.79221	6.48744	6.89671	7.64596	7.07879	5.60779	6.65407	6.32572	5.41495	5.92701	6.2384	6.16128	6.99998	4.73183	6.25578	6.72674	4.86245	5.93473	7.27292	6.60291	7.28645	6.10554	6.16258	5.41697	4.84911	6.74265	5.88103	6.74992	7.30837	6.88958	5.92583	6.31358	5.72411	7.03187	6.62153	8.0333	5.15436
ADH1B	7.65606	6.72766	7.11385	7.54014	10.6807	10.0949	11.0357	10.0294	7.92495	9.07986	5.73308	5.44393	5.44775	5.78229	5.72402	5.69702	5.62957	5.69853	5.70962	5.57942	5.65663	5.85716	5.74153	5.60459	5.5671	5.65232	5.84514	5.90428	5.69294	5.52005	6.18754	5.43533	5.65682	5.48025	5.47613	5.59106	5.39639	5.59819	2.54163	5.45164	5.72533	5.99516	5.61598	6.12032	5.49787	5.648	5.64668	6.29183	5.65719
SMPD3	8.22463	9.56502	7.61015	8.14588	9.9674	10.4127	9.34256	10.0194	9.96473	9.17745	5.8955	5.87965	7.57771	6.21235	6.19477	5.85472	5.56053	6.29591	6.46671	5.43543	5.74178	6.26576	5.89144	5.75903	6.13978	5.59126	6.48858	6.71672	5.64697	5.57814	6.89534	6.08035	6.17727	6.11571	5.98388	5.50304	5.7157	5.57663	3.40328	6.12808	6.05066	5.97044	6.20525	6.89325	6.8215	6.49023	6.20626	6.50273	5.98456
ADCYAP1	6.18722	6.57908	6.47506	6.50652	6.40533	7.17134	7.30815	7.29345	7.10165	6.32315	5.23631	5.30977	5.50392	5.25067	5.44173	5.00276	5.48851	5.17757	5.44445	5.37443	5.3097	5.30349	4.98301	5.0388	5.19044	5.13714	5.21594	5.35462	5.04927	5.28531	5.55176	5.91978	5.19222	5.12435	5.1838	5.1786	5.19557	5.43802	4.48387	4.96647	5.19771	5.14234	5.40669	5.32785	5.55746	5.5444	5.3402	5.04903	5.57543
TCF21	7.81863	9.09077	8.02452	8.51509	8.25127	9.19661	7.92212	7.98093	8.64513	9.38816	5.64063	6.22254	6.70904	6.30137	6.00213	6.25304	6.08211	6.04591	6.24506	5.44669	5.84555	6.19222	5.61078	5.81666	6.33495	5.39052	6.34142	6.18395	5.81324	5.91906	6.70536	6.7222	6.5306	6.12814	6.2268	6.01167	6.13797	5.8145	3.882	6.60243	6.74248	7.76982	6.5786	7.03949	6.90836	7.79652	6.39159	6.66746	6.54941
REEP1	9.2659	10.1066	8.42359	9.19617	10.7502	10.521	10.1592	10.4511	10.8972	10.2696	7.54847	7.42123	7.81291	7.00469	7.47934	7.86682	7.42206	7.44824	7.72033	6.73037	7.68746	7.77502	8.33509	7.25468	7.64445	7.14784	8.40298	7.89246	7.10117	7.74008	7.9179	7.75895	8.00034	7.58648	7.67031	7.45668	7.34277	6.99502	5.40913	7.4265	7.56162	7.27312	7.79641	7.93032	7.77324	8.12745	7.71123	7.77864	8.06743
MGARP	9.92673	10.7415	8.65774	9.5572	11.2526	11.1583	11.218	11.246	11.0029	10.5263	4.96727	5.49678	5.20587	7.52021	4.99618	5.49808	5.34496	5.36757	5.01743	5.87125	6.20045	6.77775	5.46777	5.49663	6.64031	6.10256	5.16424	5.07278	5.74259	5.09418	6.47089	6.05245	6.35495	5.53459	5.78923	5.18887	5.86765	5.32522	2.91303	5.20634	6.17455	10.0931	7.92916	5.61712	6.46193	7.45599	6.55611	7.80326	6.77564
SFRP1	8.91476	9.08285	8.65376	8.91843	9.39816	10.437	7.43699	8.45291	9.10052	10.375	5.44789	5.7432	6.11138	5.62118	6.13581	6.56379	6.0702	5.57697	5.85009	5.54332	6.11937	5.9667	6.08143	5.40957	6.07073	5.46549	6.48836	6.12195	5.4192	5.65316	6.47775	6.1934	6.65244	6.33794	5.7564	5.80464	6.60964	5.55708	5.29487	5.6623	7.14681	7.96716	5.98769	6.19639	6.03034	6.49019	5.85049	6.79903	5.92974
CPB1	6.24082	5.8196	7.49221	7.51815	9.50207	9.61319	10.4938	9.85071	8.15261	8.81337	4.99845	5.80213	5.10145	5.03313	4.88149	5.17861	5.2307	4.69776	5.22675	5.25222	6.49887	4.92685	5.17839	5.26849	5.17297	4.95591	5.4586	5.74493	5.10735	5.36711	5.41845	6.0638	6.89171	4.8539	5.49252	5.11763	5.31378	5.31458	4.27486	5.11267	5.56929	6.34708	5.35716	5.95338	5.92038	5.4244	5.40447	5.28151	4.66998
RYR2	7.67799	7.59448	7.72375	7.63087	6.18645	6.28119	6.01295	6.47253	6.61679	6.52877	5.53026	5.59865	5.22824	5.76712	5.72945	5.31834	4.95797	5.51728	5.30987	5.48894	6.27021	5.00095	5.10707	4.77432	5.19459	5.25485	5.56604	5.5439	5.17595	5.33563	5.20699	5.37733	5.30022	5.00137	5.46258	5.00298	5.25	5.4083	3.50568	5.3291	5.29347	5.59799	5.01353	5.29839	5.84217	6.12744	4.98145	5.11586	5.47629
GABRG1	6.13189	5.91666	6.57475	6.32284	5.49562	7.3324	5.23436	5.94897	6.67557	7.58951	4.81199	4.84514	4.68837	5.42455	4.80381	4.80138	4.77135	4.85524	4.78454	4.68341	4.90446	4.94113	4.80373	4.67564	4.94549	4.92331	4.72992	5.14512	4.94275	4.81923	4.70742	5.15638	4.62646	4.77642	4.53478	4.93924	4.91004	4.80526	4.0215	4.92722	4.83244	5.15646	4.98612	5.00397	5.10463	5.19447	4.80598	4.85003	4.79716
OGN	8.8226	7.95512	8.19431	8.86653	11.6268	11.0955	11.7501	11.7337	8.98684	9.76243	4.04881	4.44095	4.77053	5.56968	4.19413	4.90669	4.08668	4.00335	4.65502	5.91627	4.37588	4.50114	4.39942	4.37521	7.24428	4.38506	4.0343	5.85865	4.35894	4.54527	6.04873	5.22884	5.05781	4.30584	4.58819	4.31348	4.48785	4.19976	2.74098	4.73705	6.11566	4.38248	4.67617	5.15003	4.49746	7.47132	4.99398	6.62101	4.6316
SEL1L2	7.94457	7.60379	6.86946	7.75667	6.56664	7.26407	7.77568	5.74642	7.44888	8.65949	6.10399	5.50774	6.06119	6.26085	5.92225	5.63579	5.50471	5.85734	5.76855	5.64101	5.93146	5.82275	5.6897	5.48174	5.891	6.03395	6.11644	5.58694	5.95606	5.68768	5.35287	5.14165	7.0059	5.51775	5.47063	5.48385	5.36491	5.69531	3.41304	5.15776	5.36539	5.67945	5.44533	5.59051	5.62772	5.54135	5.19387	5.59793	5.59837
SOX17	5.82261	5.99556	8.28451	5.99691	4.64488	7.5259	4.80696	4.57492	5.07643	5.70017	10.8046	10.6039	9.20529	10.708	9.69533	10.135	9.34558	9.71332	9.58469	11.2959	10.2434	11.025	9.04793	10.5988	9.51912	11.1895	9.59176	10.0814	11.0604	9.24287	8.7611	9.14146	9.42098	9.01777	9.28504	10.6862	10.7124	11.3266	10.0149	9.08653	7.79543	11.5495	9.66467	8.5559	9.7276	9.04228	9.68104	9.38295	10.0387
MECOM	6.45598	6.67141	7.67117	6.72883	5.16521	6.52813	4.60584	4.65087	5.66973	5.01727	9.35145	9.34688	7.77628	9.47349	9.45016	9.08836	8.52619	9.32184	9.36817	11.2374	9.41813	9.34096	9.07609	10.3663	8.56098	11.0131	8.70248	9.13211	9.64937	8.70755	8.30334	8.66898	9.07524	7.7542	8.65557	9.0305	9.89839	11.0234	9.22202	9.33014	8.41146	10.0024	9.02776	7.97715	8.78645	8.42427	9.05778	9.00787	9.24921
PROCR	8.34285	8.46759	8.73135	8.95985	10.9857	10.4281	10.9654	11.6023	10.2552	9.96378	5.28239	5.87965	5.58476	5.58987	5.70867	6.69098	5.49369	5.07057	4.97211	5.51672	4.51874	5.28773	5.22194	4.56527	5.98523	6.10235	6.49811	5.26949	5.42704	6.07409	5.20793	5.32175	6.06689	4.45926	5.73053	5.21648	7.45738	5.58559	2.88153	4.49146	5.48335	6.22404	6.6285	5.46005	7.20238	5.79939	5.75399	6.83195	5.6583
LINC00550	16.6477	16.3101	15.6597	15.2453	14.1014	12.4634	12.6106	13.9745	13.2016	13.4822	5.20073	6.47398	5.78464	6.29668	6.04213	5.41121	5.52965	6.06155	6.16593	6.68228	5.80451	5.80966	5.70103	5.84579	5.82316	5.32054	5.72585	6.36347	4.94602	6.10293	5.48456	6.24218	6.32327	6.87866	5.05389	6.14494	6.11977	5.17583	6.47529	5.85769	5.95351	6.47737	5.1843	5.39665	4.97898	6.04226	5.65072	6.11572	5.84558
PCOLCE2	7.93179	7.87724	7.19632	7.00843	10.3795	10.03	10.7784	10.1005	9.25271	9.4448	5.51733	5.40974	4.40635	5.3353	5.32735	4.79288	4.80928	5.33504	5.06087	7.11533	5.9706	5.27327	5.02731	4.39223	7.27968	5.34551	5.51703	4.59531	5.28182	4.95441	4.65901	4.13051	4.81609	6.85486	4.66736	4.60545	6.11201	5.86979	3.58591	4.41109	4.2879	5.9118	4.55645	4.71632	4.26437	4.74403	4.81013	5.2774	6.14564
RP11-642D21.1	7.07854	6.99598	7.11425	7.47673	8.69519	8.79954	8.97177	8.66019	7.91674	8.38673	5.52973	5.00257	4.84015	5.64781	5.47679	5.45085	5.39147	5.75793	4.57515	5.09376	5.32491	4.76053	5.55153	5.02862	5.12904	4.77852	5.13922	5.24111	5.32355	4.52546	5.22677	4.69172	4.73431	5.9747	4.48051	4.76594	5.28317	4.61889	6.4068	5.60169	5.18689	5.1269	4.94577	4.88346	4.73407	5.06786	4.45882	6.02751	3.70939
SLC30A4	7.41388	7.87902	7.48956	7.94093	8.18885	8.77271	8.06518	8.59428	9.57679	9.41998	6.1982	6.76397	6.43636	6.88287	6.06412	6.36617	7.44355	6.61441	6.07907	6.3045	6.84208	6.45134	6.29397	5.66585	6.93477	5.8486	6.85467	6.77932	6.69487	6.303	6.15014	6.43466	6.56729	6.59508	6.04587	6.39411	6.14002	6.56363	5.55843	5.96133	6.51043	7.49005	6.23716	6.91903	6.71114	6.82637	6.63205	6.86758	7.10505
NDUFB11	9.04774	10.2029	9.20762	9.27374	8.85409	8.58636	8.58799	8.49954	8.57396	9.03729	11.368	11.3235	11.2739	10.7767	11.4272	11.2641	11.5448	11.3947	11.3404	11.097	11.2608	11.1461	11.4515	11.5289	11.1774	11.3897	11.2594	11.1367	11.3245	11.3713	11.2128	11.4943	11.5061	11.4385	11.2155	11.6324	11.6335	11.8284	7.75967	11.2416	11.5299	10.073	11.2817	11.2903	11.2061	11.2211	11.2723	11.2538	11.4061
ARX	7.47567	8.01433	7.24449	7.42091	7.50841	8.64183	6.46887	7.21975	7.78267	8.38256	5.93244	5.8726	5.852	6.57022	6.08983	5.68988	5.33891	6.36189	6.34069	5.4863	5.56417	6.29685	5.51528	5.36715	6.09324	5.63259	6.23767	6.41404	5.656	5.78316	6.44603	5.56543	5.75136	5.78922	5.61767	5.35813	5.42758	5.30564	3.75977	5.48055	5.53165	7.96324	6.02181	6.01192	6.34347	7.10138	5.87038	5.58284	6.33966
GPRASP1	8.50417	9.35457	8.71265	8.73716	9.81881	10.7096	9.69349	9.43347	9.77437	10.2762	7.24254	6.96179	6.52795	6.68104	7.39064	7.18109	6.48371	7.11886	6.84016	6.52613	6.91576	6.914	6.57509	6.18222	6.84555	6.63787	7.59429	7.21313	6.92235	6.51554	7.57283	6.50724	6.305	6.67609	6.34282	6.02867	6.43696	6.44059	5.19802	6.41633	6.4213	8.01207	7.5718	6.9708	7.38222	8.29977	6.72	7.16686	7.75302
RP1-78O14.1	6.72158	7.4962	7.82185	7.25391	8.01164	8.43777	8.82164	8.77922	6.86945	8.14819	4.38857	4.92737	4.91437	5.09863	5.15779	5.29087	5.07854	4.99756	4.86882	4.89606	4.53702	4.71581	4.49404	4.4365	5.27024	4.8928	5.20272	5.4316	4.24389	5.53261	5.09866	4.67142	4.8599	4.63614	5.89399	5.047	5.07013	5.69979	0.654788	4.93921	4.89196	4.31421	4.89242	4.40639	5.0285	6.3024	5.21429	6.93219	4.95354
PDGFD	8.30241	9.21342	7.94944	9.00951	9.99856	9.6448	9.83715	9.8615	9.59838	9.68508	6.04474	6.80796	7.21848	6.34882	7.16231	7.04683	7.08444	6.78671	6.59766	6.64244	7.56685	6.57989	6.63222	6.59765	7.26047	6.94483	7.17591	6.86502	6.64024	7.05776	7.7469	7.20222	7.78534	7.35649	7.25342	6.46593	6.68574	6.33367	5.47379	7.05395	7.00232	6.80179	6.92321	8.08107	7.25948	7.97612	7.19261	8.47866	7.0408
SERTM1	9.77891	9.93495	7.95262	9.49715	10.9189	10.5168	10.4848	10.3804	10.1876	9.79651	7.16481	5.26822	6.59101	8.42392	4.84869	5.57699	4.78982	5.49566	5.2283	9.83985	6.64305	6.54636	7.90853	5.88555	5.14102	6.18713	4.94415	5.67624	6.14493	5.19729	5.79214	6.08232	7.10776	5.97914	5.61613	6.08074	5.12278	4.95435	4.81244	4.85487	4.9588	5.95421	7.31984	5.8169	6.6488	6.04659	5.8144	5.47543	6.13752
HMGA1	6.29696	6.63483	7.12712	6.75436	6.39623	6.45058	6.24282	6.08325	5.9922	6.20361	9.89572	10.3269	10.1657	8.89967	10.2405	10.4004	10.4812	9.98161	10.0176	10.2086	10.3053	10.353	10.6834	10.5273	10.3046	10.6328	10.3002	10.1212	10.3398	10.3586	10.2287	10.6282	10.2934	10.2244	10.2989	10.5636	10.5475	10.2971	5.48677	10.6309	10.6353	8.88397	10.547	10.5286	10.3544	10.5403	10.3414	10.5206	10.527
SPOCK1	9.68297	10.5492	9.17798	9.94571	11.2193	11.8394	10.0154	11.0788	11.6933	11.2082	5.53763	7.0958	5.66425	5.87543	5.47059	6.95548	7.90781	5.91591	5.91051	6.42762	6.98801	6.05631	6.44356	5.74522	6.30247	6.45958	8.95714	7.66687	6.37925	6.56884	5.72227	7.1765	6.49902	5.77618	5.6799	6.18465	6.4099	5.55348	4.47597	5.63673	5.51536	5.7752	5.90361	5.51115	6.54831	6.08898	7.01634	8.64096	5.5139
RPL36A	5.8514	6.05512	7.0875	7.50277	7.34824	8.18941	7.17674	7.03143	7.06487	6.79874	4.15546	4.06077	4.33624	4.19536	3.96284	4.3337	4.68804	3.43429	5.00689	4.12262	4.2309	4.40431	4.25775	4.78448	4.49488	4.63454	3.95796	4.50685	4.21854	4.10971	5.07599	4.64493	4.6354	4.29288	4.44709	4.32653	4.08396	4.22093	2.67213	4.44727	4.69573	4.81185	4.58005	5.36062	4.55111	5.0415	4.84534	4.68429	4.85192
WFDC2	8.33117	8.95524	8.90958	8.32012	7.25511	7.3896	7.2435	6.98362	7.10229	7.1066	11.3632	11.1189	10.5175	11.0237	11.4323	10.0652	9.82964	10.3346	10.6645	11.4875	11.2529	10.9379	10.6883	10.6436	9.73368	10.987	9.67204	9.75422	11.2673	10.8845	9.41323	10.3027	10.8765	9.65454	10.3376	11.7647	11.1251	11.1632	10.4607	10.3945	9.77533	11.8312	9.51827	8.5607	9.28005	8.76246	10.6811	9.77923	10.3543
SLC5A1	5.67528	5.3502	5.53021	5.1623	4.45116	4.17832	4.21005	4.4721	4.35282	4.55434	7.74761	8.08878	7.927	7.53603	8.14476	8.1971	8.18897	8.08733	7.87107	7.7808	7.69355	7.96704	8.45094	8.60999	7.90481	7.55758	7.90188	7.76586	8.08856	8.29917	8.04209	7.77128	7.92447	8.22785	8.21824	8.4581	8.48985	8.09233	6.63593	7.94062	7.98391	6.83228	8.02206	7.93041	7.89692	8.06165	7.88142	7.74145	7.97199
EPB42	8.00224	8.44341	7.65668	7.81433	8.55076	8.42871	8.17899	7.94999	8.01826	8.33779	5.98526	6.13943	6.79099	6.39016	6.50415	6.29178	6.58831	6.16043	6.04947	6.08297	6.31221	6.25084	7.07307	6.60873	6.3091	6.31213	6.67247	6.40762	6.54625	6.38102	6.65675	6.77407	6.77887	6.31414	6.42539	6.69056	6.58214	6.55193	4.34344	6.63011	6.83983	6.29795	6.05157	6.51125	6.14211	6.04831	6.57986	6.24798	6.22161
PTPRZ1	7.3063	6.43718	7.62694	7.56107	7.83862	7.524	8.4446	8.34599	6.98319	5.7686	3.37091	3.43095	3.78621	7.9956	3.98776	3.98459	4.30751	3.6978	4.48864	3.42781	3.74107	3.98416	3.83097	4.01648	3.52006	3.74054	4.5051	4.08098	3.48502	3.87658	4.46062	4.12872	4.51943	4.26886	4.51282	3.60865	3.66833	3.63905	1.89766	4.27763	4.16034	5.64462	3.58979	3.93383	4.14581	4.40208	4.26054	4.03107	3.21211
RP11-489G11.3	16.7486	17.5943	17.6979	17.422	14.2245	11.165	11.2029	15.4598	13.7811	14.5065	6.52269	4.99482	6.00823	4.24522	3.56216	5.62717	4.95447	4.10527	5.421	4.73921	5.30416	5.90292	6.14569	5.02762	5.39237	5.46792	5.71711	5.03985	5.70287	4.89933	5.79512	5.96133	5.43088	5.84149	5.74848	6.3384	4.89978	5.62541	4.63685	5.67476	5.98302	3.87277	4.39424	5.1272	3.861	5.22409	3.8216	4.23376	3.46205
TNFRSF8	7.98313	9.07439	8.01429	8.37504	8.17391	8.51128	8.33703	8.65428	8.66947	8.85316	6.12775	5.49263	5.4769	6.11986	5.90081	5.6539	5.32294	6.30507	5.86941	5.61212	5.63645	5.61964	5.76237	5.07003	5.57996	5.39239	5.83336	5.86574	5.25518	5.50263	5.53922	5.52378	5.8347	5.41964	5.73372	5.24126	5.66414	5.46503	5.93181	5.47293	5.59242	5.85406	5.80223	5.55521	5.98129	5.47689	5.61724	5.77484	5.89009
CD24	8.90826	9.66744	10.335	9.07487	7.99052	8.67295	6.69133	6.99184	8.14932	7.50221	12.6176	12.8074	11.4343	12.2284	12.1084	12.6798	12.9773	11.1343	11.7491	12.7979	11.6849	12.7926	11.0608	13.0527	12.5152	13.4474	11.4189	12.0551	11.5549	11.58	10.5607	11.2314	11.1801	10.1445	11.8045	12.778	12.2054	12.2732	12.214	11.8186	9.70705	13.1523	11.6105	10.8186	10.7978	10.4586	11.0943	10.7283	10.5091
TMEM255A	8.12078	9.21391	6.97237	8.17131	10.1409	10.2857	9.67812	9.59192	8.61421	8.77965	7.52442	3.91254	5.31714	3.85975	2.81785	5.38395	3.60884	4.50099	3.58726	3.97803	4.09638	3.27717	3.94941	3.53108	4.07374	3.89106	4.49033	4.01273	4.17415	3.18819	3.44816	6.57528	3.46643	8.38221	3.70216	5.17869	3.99147	3.44709	3.13698	3.55621	4.13491	3.86734	4.26901	3.22449	3.11285	5.77597	5.41865	5.07544	3.56609
DSC3	6.82093	7.32026	7.0491	8.02037	8.82384	8.96203	9.48423	9.2424	7.99337	7.69411	5.55924	5.35513	5.74308	5.65834	5.58983	5.47189	6.61602	5.43005	5.72876	5.53	5.79175	5.72952	5.56451	5.6814	5.59835	5.99488	5.7047	5.8479	5.42722	5.67839	5.65678	5.84334	7.51879	5.47742	6.24194	5.58767	8.66464	5.59324	4.23781	5.69082	5.8079	5.94406	5.78756	5.96621	6.67838	6.08348	6.17493	6.69998	5.64465
LHX9	6.40526	7.26391	7.33797	7.23422	6.87596	7.35653	6.66152	7.28127	8.14394	8.41732	5.14768	5.48189	5.75136	5.2221	5.25319	5.51053	5.30993	5.60845	5.36438	5.13841	5.31984	5.47021	5.52729	5.30903	5.36507	5.15663	5.4563	5.65613	5.27277	5.40361	5.66059	6.35034	5.8517	5.47464	5.52312	5.39404	5.34843	5.31759	3.5608	5.72035	5.87291	5.49984	6.71318	6.56593	6.21284	7.63097	5.52901	6.12726	6.11059
PTGIS	8.82385	9.9226	8.06721	7.46922	10.4855	10.3228	9.36018	9.70011	9.54312	10.0793	5.28161	6.12901	6.29229	6.05113	6.10889	6.64913	5.59936	5.38617	5.61306	6.35012	5.48855	5.89135	5.26595	5.26962	6.13459	6.34616	6.92859	5.7351	5.35963	6.28355	7.049	6.76154	7.52507	6.42486	6.3044	5.47115	5.9744	6.05398	3.68168	5.24757	6.23414	7.78239	6.05163	5.90049	6.61972	7.00246	6.90386	8.46143	5.37216
LHX2	7.07326	8.03345	7.51665	7.89374	8.04282	9.46856	7.36594	7.75453	9.84298	9.61617	5.67286	5.68288	6.08647	5.39927	5.98337	5.62541	5.71064	5.67537	6.34547	5.28614	6.52906	5.73007	5.98216	5.91527	5.95662	5.80266	6.5765	5.95649	5.78201	6.05316	5.74354	5.99914	6.71127	6.26165	6.12899	5.82657	5.68526	5.68314	3.06172	5.81427	5.92352	5.94224	5.52212	6.33207	6.77754	6.2202	5.94799	5.64339	5.84562
GPR133	8.57521	9.05908	8.1838	8.30785	11.3873	11.1402	11.2169	11.1947	10.1541	9.88619	4.45022	4.50618	4.78428	4.53474	4.19607	5.24198	5.09785	7.37759	4.84721	5.83174	7.80634	4.45806	4.93054	4.52997	4.87048	8.28703	5.23267	4.29299	6.48954	5.14835	4.63527	5.38801	5.99368	4.86915	4.64884	4.44476	5.18047	5.04526	3.65626	4.02434	5.63116	4.65626	5.80719	4.26633	6.25002	5.89112	4.5221	6.37716	4.34023
CALB2	8.90117	9.76847	8.54251	9.03724	10.3952	10.4506	10.3544	10.9729	11.2378	10.7877	7.6773	7.58645	7.99947	7.31892	7.80575	7.46416	7.19739	8.42656	8.01368	7.25055	7.7222	8.0823	7.79739	6.94628	7.94643	7.14268	8.53749	7.99663	7.5454	7.86249	8.03901	7.93097	8.23756	8.10298	7.81819	6.87266	7.07135	7.24381	3.4265	7.54495	7.75621	7.45409	8.16921	8.26765	8.03743	8.44787	8.06035	8.26124	8.23072
BEST1	5.61965	5.08982	5.72513	5.62965	5.35673	4.7272	5.10462	4.74542	4.72996	4.76359	9.39465	9.20074	9.11264	9.06309	9.05641	9.28139	9.26096	9.25632	9.04721	9.24893	9.10485	9.15546	9.15036	9.29404	9.07167	9.12386	8.76833	9.28103	9.195	9.1494	8.94177	9.22585	9.04485	9.04562	9.22796	9.31685	9.36969	9.31152	7.43795	9.14148	9.30186	8.83525	8.97577	8.93059	9.08806	9.16661	9.04908	8.91458	8.95983
LGALS2	7.28876	8.7642	7.08888	7.07327	9.57358	8.82941	10.4294	9.42788	8.67052	8.69334	5.25194	5.33974	5.15852	4.93085	5.37725	5.04736	5.06971	5.18229	4.82667	5.07005	4.63827	4.95542	4.75502	4.82064	5.14362	4.67321	4.98053	5.13715	4.93142	5.25463	6.30555	5.46508	5.00868	5.22268	4.95158	5.21115	4.83547	6.28106	2.63347	5.77446	5.48375	5.11059	5.2563	5.31468	5.16111	7.29517	5.35117	5.31613	5.01744
SDPR	6.67522	6.61589	6.42901	6.94531	7.7276	7.84733	8.97846	8.71786	6.69191	6.82172	4.7797	6.36591	5.09838	5.74619	5.22189	4.75441	4.55695	5.48973	5.28856	4.7017	5.55476	5.79181	4.97386	4.42599	5.66542	5.78343	5.1719	5.14384	4.74289	5.07315	5.47124	4.91158	5.43105	5.95317	4.88014	4.50454	5.49163	4.58967	2.68618	5.25524	4.83175	7.00254	5.29732	5.9255	5.53584	5.54247	4.73492	5.70644	4.86533
CLDN3	6.57288	6.34158	7.31533	6.40224	5.82241	6.25935	5.82375	5.80131	6.0889	6.22493	10.217	9.61644	9.58038	10.6658	8.90351	10.0325	9.48921	9.4316	9.71987	9.21082	9.64311	9.9064	9.03744	10.6766	8.60942	9.9915	9.36579	8.97781	10.4867	9.67377	8.93876	9.42848	9.50116	9.40463	9.70449	11.6585	9.60744	10.4009	8.88871	9.64446	8.78115	11.3023	9.27967	8.04447	8.94364	8.25056	8.77082	8.34511	8.80725
PAPSS2	8.45487	7.9354	7.60956	7.79644	9.95694	9.53692	9.76896	9.35521	8.72814	9.11038	6.02131	6.87765	7.19059	6.4555	6.48859	6.85472	6.94152	6.87461	6.60883	6.40465	6.31835	6.56881	6.22866	6.00054	7.76116	6.22385	7.34303	7.27211	5.88704	6.69904	7.04097	6.8054	7.52891	6.20886	6.93973	6.73761	6.26892	6.41728	7.88159	7.25812	6.54165	7.64947	6.65717	7.12495	6.97418	7.82518	7.3385	7.68219	6.90409
CXorf57	7.1644	7.33005	6.8655	7.42563	7.66838	8.24578	7.80669	7.60774	7.79484	7.59347	4.67483	4.55452	4.52636	4.50626	4.44129	3.85674	5.49646	4.43458	4.06355	4.4372	5.4093	4.19359	5.00223	4.28513	4.81948	4.99509	4.0522	4.53498	3.98528	4.33368	4.41434	4.32006	4.43159	4.11926	5.07927	4.38467	5.77453	4.19736	2.60258	4.35972	4.68182	4.67469	4.27427	4.68938	4.2691	5.25349	4.77566	4.89522	5.88635
HSD17B2	6.70688	8.49888	5.93163	8.19373	7.1414	6.95552	7.07716	6.84186	7.53729	8.39723	5.61594	5.30267	5.90979	5.52531	5.72391	5.3091	5.76361	5.96298	5.37999	5.64074	5.57291	5.5289	5.38572	5.3944	6.00198	5.16953	5.72618	5.87868	5.34971	5.31314	5.51557	5.41096	6.17714	5.66677	5.39107	5.01184	5.33461	5.21478	2.73937	5.84937	5.61822	5.01181	5.47109	6.13811	5.93091	5.83784	5.6962	5.33545	5.4834
C1orf106	6.92027	7.10675	8.14236	6.96641	6.87277	6.63767	6.94058	6.81549	6.68633	6.87528	9.90143	9.71438	8.87893	10.4681	10.1981	9.20241	10.4777	9.20202	10.3131	9.64206	10.5496	10.2699	9.73914	9.77796	8.26797	11.2284	9.08575	8.70755	10.2211	9.69409	9.17828	8.61711	8.94115	9.49097	9.02806	9.54219	8.52322	10.5683	9.39521	10.0276	7.81507	10.3803	9.7981	7.3378	8.73021	8.71528	9.93652	8.96302	7.26242
CDON	7.41464	7.96235	7.04688	7.50693	9.35271	9.04137	8.94009	9.15974	9.15715	8.85658	6.42423	6.00801	6.82396	7.01295	7.17347	6.38714	6.41079	6.36294	6.76165	6.29441	6.79948	6.30886	6.17235	6.01284	6.87317	6.25412	6.44155	6.42487	6.36735	6.94919	6.40135	6.37467	6.38253	7.21271	6.33741	6.11931	6.64607	6.08865	3.77957	6.31855	6.39494	7.14888	6.39087	6.40786	6.86015	6.37127	6.39739	6.89939	6.17661
CXXC5	10.2054	11.1248	10.2223	10.1432	9.42329	8.8624	8.95268	9.29584	9.93354	9.06887	11.4385	11.29	10.508	11.6028	11.8713	11.395	12.1048	11.529	10.5544	12.5392	11.1994	11.0798	11.6102	12.3326	11.3742	11.7431	11.1082	11.141	11.6217	11.0713	10.9941	11.4298	10.8636	11.2054	11.176	12.1222	11.9687	12.4314	10.8065	11.8942	11.2997	10.5982	11.22	10.6584	10.8133	11.0129	11.3858	11.2621	11.3623
KLHDC1	9.32262	10.1669	10.0936	9.16087	7.02136	7.16683	7.45626	7.77963	7.30696	7.14171	4.75176	3.23679	3.80493	4.27475	3.07654	4.11904	5.5806	4.92578	3.30375	3.8009	5.56888	3.77047	5.46347	4.18174	4.94557	3.51769	4.92412	4.02434	4.85303	3.42281	5.24294	3.89981	5.10758	6.87529	3.98852	4.28864	3.63867	3.71002	4.98659	3.47509	5.17261	5.50655	3.7371	4.0437	4.82229	5.11914	5.86265	5.67847	4.83078
DFNA5	9.81203	11.2163	9.21556	10.0151	12.1177	11.8988	11.7763	12.0295	12.0367	11.4621	7.23938	8.24202	7.37872	7.6293	7.75028	7.57927	7.49857	6.76233	6.45999	6.88196	9.07291	6.82485	8.74098	7.45083	7.4973	7.95235	7.75341	7.72348	7.4287	6.99957	7.23854	7.99959	7.63009	7.05718	6.91398	9.31127	7.1063	7.62433	5.81891	7.17643	7.23279	8.56647	7.40183	7.81388	7.1109	7.76353	7.89563	8.47925	8.05837
RTN1	8.34268	7.61448	7.77045	7.39735	9.26269	9.00877	9.21516	9.72481	11.06	9.36163	6.16101	6.52534	5.81143	5.65663	5.79312	6.38384	6.06126	5.50311	4.85321	5.34963	5.9832	5.35263	6.78389	6.31065	5.32822	5.18203	5.31164	6.11075	5.2934	5.23683	7.01798	6.49339	6.00921	5.06572	5.39715	5.28862	7.06295	6.22623	4.18592	5.36316	7.10262	6.30268	5.60911	6.14101	5.45703	6.71783	5.21945	7.30693	7.00527
TVP23A	9.40193	9.62055	9.21148	9.2394	7.48237	7.89287	6.92753	7.19679	8.10878	7.03291	4.88443	6.57052	6.12863	4.75508	3.97126	4.33139	4.42311	3.705	4.4069	4.12089	3.84456	4.3843	4.26889	3.97117	3.60944	3.94794	4.32521	3.86099	3.64678	5.83643	4.56788	4.82683	4.75854	3.96515	3.64203	4.13214	4.12266	4.39244	3.99579	4.13787	4.73825	5.6312	4.29586	5.36196	5.19648	4.81138	5.34008	4.73862	5.49113
EPCAM	9.20051	8.89767	10.5641	9.65207	8.40137	9.95495	9.75052	9.81501	11.25	10.7007	13.4609	12.4515	11.549	12.624	12.9892	12.3226	13.6217	12.1381	12.1228	13.7137	12.5524	12.7393	12.7949	13.4411	12.5934	13.4282	11.5558	11.8851	13.3354	12.0982	11.1483	11.3584	11.3937	11.7436	12.2137	12.7991	12.9046	13.4721	12.3956	12.1542	12.165	13.3468	11.8985	10.9645	11.3283	10.3852	11.7701	11.1432	11.1162
BAMBI	8.138	9.51541	8.43349	8.4261	8.75988	9.70576	8.90783	8.93426	9.44573	9.88057	5.43496	6.02246	5.93044	6.78637	6.14536	5.92424	7.63979	6.61908	6.27287	5.82043	6.75422	7.21661	5.95711	6.19047	8.51529	6.61915	7.12959	6.39103	6.47261	5.74142	6.95248	6.82818	6.69231	6.76086	6.10666	6.49429	7.23766	5.82103	4.11212	6.21666	6.96279	8.5095	6.68101	7.32195	7.34245	7.36061	6.61728	6.84136	6.85419
PKD2	8.55399	9.347	8.78887	9.32299	11.1435	10.9604	11.0789	10.9384	10.4122	10.3797	5.43487	6.52465	5.0734	5.62432	5.42263	6.0748	6.1955	5.42477	3.77167	6.31785	6.18949	5.03816	6.64138	5.49445	6.73396	6.17045	5.89496	6.0378	5.82818	5.62192	5.28038	6.52101	5.72355	6.45352	5.61969	6.97746	6.36309	5.29742	5.59426	4.85824	5.66418	6.50511	4.96006	4.59481	5.30551	5.36653	6.51059	7.31439	6.2378
ABCB1	9.22577	9.26661	9.3544	9.29846	6.98142	6.92697	8.01896	8.06155	6.97378	7.04002	6.0142	5.13851	5.21684	5.50005	6.16003	5.23982	5.43203	5.80358	5.33473	5.25321	5.00768	5.43642	5.07292	5.22897	5.72415	4.94406	5.38596	5.44096	4.95205	5.00209	5.04604	5.18342	5.47133	5.17631	5.05766	4.99908	4.96109	4.89145	3.3368	4.99204	5.59147	4.94575	4.69836	4.72915	5.65026	5.26186	4.50099	4.78582	4.99941
GIPC2	7.41259	7.95117	7.07529	7.70503	7.6895	8.38327	7.34528	7.95199	8.75701	8.85811	5.27216	5.03176	4.53765	7.16082	4.99949	5.75459	4.55303	5.0924	5.1834	6.47845	5.72497	4.91598	4.56492	4.09128	4.98281	5.04643	5.08824	5.18523	5.02271	5.19302	4.85443	4.61547	4.81637	4.68069	4.78057	7.40348	4.47807	5.08057	2.87449	4.20753	6.42941	4.94256	4.49107	4.51586	5.52316	5.46475	5.02418	4.63746	7.93962
RP11-550I24.2	7.98856	8.1052	8.13832	8.25341	7.86843	7.35814	7.20762	7.25302	7.47294	7.83807	5.40015	4.80586	5.17624	5.15405	5.06307	5.40557	5.36525	4.9151	5.01918	5.15155	5.1658	5.25917	5.47905	4.77259	4.85663	4.9477	4.93038	5.32391	4.71491	5.12433	4.63844	4.58059	6.16809	4.76159	4.89339	4.91059	5.15706	4.99201	3.83261	5.42262	5.16206	4.61389	5.20368	5.65911	5.35578	5.66281	4.97941	5.36845	5.09642
FGF13	8.49913	8.87598	7.89526	8.60977	8.9865	9.7799	8.92647	9.15755	10.7586	10.1674	8.68355	5.38038	5.72569	6.7138	6.72933	5.7355	6.05858	5.97646	6.92383	6.69186	7.21848	6.56641	5.54584	7.02095	7.27394	5.76363	6.69593	5.73632	6.47393	5.43082	5.52547	5.76383	6.21792	6.28551	5.38081	7.63946	6.9176	5.34304	6.04419	5.06148	5.12293	7.6943	6.95517	6.29006	5.98355	6.92329	7.41407	6.09392	6.09662
SHISA3	9.68618	9.9021	9.68551	9.65558	11.4433	9.99056	10.5151	10.412	10.7272	10.4601	3.85323	2.98502	3.71818	2.72619	3.565	2.86109	5.16229	3.82296	3.40584	1.9021	4.19846	3.00709	8.85805	3.32088	3.35318	2.94952	4.05818	3.04274	3.62559	3.61673	3.96923	4.22665	4.53039	4.5534	3.81912	3.15281	4.02814	3.39651	2.25876	4.10494	3.42024	2.23798	3.84665	4.64324	3.75245	4.04184	3.71642	5.05601	7.3277
CSGALNACT1	8.95797	9.39868	8.58678	8.79119	10.2119	10.2482	10.0684	9.78255	9.34758	9.71783	5.81281	6.21273	5.75121	5.80652	5.90116	5.7833	6.15576	5.82273	5.48622	6.51366	6.30631	6.02215	7.0996	6.20189	6.9085	5.43029	5.20924	5.73864	5.40107	5.80612	5.76065	5.91115	5.79502	7.0733	5.58568	5.74868	5.47323	5.33777	4.83055	5.58218	6.28746	7.73596	5.74763	6.20261	6.00376	6.13026	6.10968	6.933	5.91584
LOC646762	8.22335	8.65223	7.2726	8.04476	8.8123	9.28946	8.35255	8.25581	8.50439	7.45472	6.38259	6.37455	6.99894	6.64649	6.51097	7.46387	6.71691	6.77623	6.92408	7.05547	6.43034	6.62156	7.13844	6.20107	6.16014	6.06028	6.75614	6.4462	6.28837	6.88467	6.69985	7.12892	6.3054	7.32891	7.6819	6.53152	6.02225	6.02474	4.63469	6.21704	6.915	6.96204	6.62554	7.1129	6.97099	6.17252	6.43648	6.79226	6.56537
MEOX2	5.29702	4.97126	6.0188	5.39	8.15083	7.95876	8.40394	8.31029	6.3133	6.56574	4.28941	3.19469	4.05457	3.59222	3.61454	3.772	4.10265	3.30788	3.53278	3.42928	3.90141	3.49393	3.02135	3.4227	4.33176	6.02742	4.42637	4.10888	3.49443	3.918	4.28563	3.98688	4.34597	3.81668	4.16085	3.66026	3.65883	3.33092	1.01117	4.26533	3.81026	3.26932	4.40026	4.28874	4.31388	4.8908	4.36168	5.70605	5.38773
HBD	6.50266	5.98251	9.14298	8.75886	11.45	10.9603	11.6671	10.3826	7.29061	10.8539	6.39615	6.28679	6.63562	6.52729	6.25811	6.2853	6.31822	6.28848	6.8895	6.18991	6.54523	6.69056	6.2267	6.59577	6.82955	6.09798	6.81148	6.96393	6.12132	6.30266	7.53931	6.77957	6.57361	6.76335	6.27792	6.451	6.52611	6.01716	4.08556	6.60916	6.90533	6.74982	6.91506	7.23894	7.14472	7.34574	6.6704	6.76121	6.62317
PCDH9	6.41556	7.22528	7.09819	8.10744	7.65852	8.74322	7.61705	8.16938	8.67959	9.59314	5.08782	5.40431	5.11692	5.54215	5.81729	4.94043	5.42826	6.94163	5.15407	5.14023	7.15853	5.15366	4.97222	5.64608	5.31705	6.01952	5.03333	5.26531	5.17811	7.28345	4.99694	5.41826	5.01747	7.91704	5.7233	5.15802	6.0223	4.9828	3.59012	5.076	5.49607	6.68423	5.12988	5.22729	6.67264	5.16663	5.29793	5.65769	4.87905
DOCK11	8.56712	7.84625	7.7424	8.44369	9.77139	9.6343	9.70593	10.2997	9.88528	9.1039	6.05714	7.25306	7.81425	5.92772	6.06763	6.45698	6.42328	6.15141	5.91536	6.05677	8.52352	5.63424	5.92195	6.33738	6.44268	5.6733	6.4701	6.51427	5.80997	5.84362	6.7446	6.67919	6.32726	7.34599	6.62456	6.90211	5.51684	5.96959	4.1308	6.08372	8.06608	5.8071	5.65874	6.74245	6.41604	6.68129	6.54654	7.55349	5.91761
PMP22	9.03826	9.8331	8.98635	8.99785	9.68449	9.27953	9.4633	9.48639	9.08474	9.09908	5.74451	6.04212	6.2042	6.21818	5.85664	6.88362	7.17625	5.92679	5.51762	6.52768	5.97366	5.95082	5.74468	6.56366	8.05459	6.18856	6.60258	6.85697	5.64131	5.9249	5.91191	6.33193	6.58513	7.19197	6.34955	6.13087	5.92668	5.99219	4.73444	5.70999	5.87326	6.57218	5.80515	5.98845	5.79652	6.9035	6.58958	7.84268	5.5098
MUM1L1	9.03596	9.7298	9.76999	10.1647	10.0685	11.3947	10.3412	11.1545	10.5609	11.2527	5.5146	5.76446	5.58013	8.06189	6.31839	6.0067	5.8526	6.2574	5.64783	5.81104	6.72664	7.48778	6.14238	5.88031	6.32202	6.962	5.99105	5.46127	6.36762	5.64769	6.14411	6.34353	6.62498	8.50936	5.74347	6.04779	8.37141	5.91518	1.72529	5.59682	7.19132	10.1317	7.79058	5.56531	7.81086	8.50917	6.03409	7.01177	8.3242
CLUH	9.30002	10.388	9.54534	9.50885	8.43683	8.32131	8.35676	8.34036	8.07389	8.12217	11.308	11.649	11.3967	10.7856	11.6076	11.577	11.7192	11.3459	11.3587	11.3911	11.5135	11.6637	11.6038	11.5253	11.6412	11.6573	11.4646	11.5179	11.564	11.6812	11.5363	11.509	11.613	11.4597	11.5783	11.649	11.3954	11.3587	7.7727	11.7041	11.5673	10.534	11.6446	11.6356	11.568	11.4987	11.5346	11.7517	11.5179
POR	6.13813	6.34977	6.31398	6.12481	6.65124	6.66596	6.56266	6.7576	7.54021	7.25686	8.9552	8.95526	9.08144	8.49522	8.66727	8.66763	8.91631	8.69279	8.8075	8.6204	8.12006	8.78201	8.54289	8.79665	8.36579	8.25641	8.73717	8.29138	8.51556	9.06793	8.79519	8.36468	8.72295	8.38912	9.06995	10.083	8.32859	8.17643	6.91853	9.23636	7.88879	8.86551	8.47956	8.0803	8.20824	8.09497	8.6513	8.28123	8.55553
LOC100996760	9.39898	9.49265	7.71933	8.23496	8.9434	9.37964	9.33913	9.76117	9.73547	8.37219	5.5369	4.96352	7.21111	5.15723	5.22891	4.88807	7.08214	6.60215	4.80768	4.02175	5.25492	5.15547	6.50263	4.28451	8.29323	3.99133	6.78049	6.83049	4.28961	4.27671	4.83424	4.82938	5.21595	6.07064	4.93931	5.96806	3.95916	4.49085	2.55798	6.44341	3.69848	4.00909	4.2346	4.13075	5.79301	4.91822	5.21942	4.86227	4.06265
LRRC18	4.38462	4.42557	3.66818	3.8232	2.98451	3.33541	3.5072	3.76992	3.71816	3.56657	7.2403	7.73535	7.92579	6.50055	7.94449	8.22298	7.90455	7.78327	7.75584	7.0617	7.70011	7.75084	8.06515	8.385	7.86496	8.02189	8.06933	7.63109	7.8448	8.13293	7.86758	8.00565	8.28038	8.03291	8.07669	8.612	8.62219	8.04719	6.30822	7.90114	8.01986	6.32307	7.9722	8.04603	7.82854	8.17204	7.99556	7.97967	8.09709
ABI3BP	6.5556	7.21891	6.93447	7.00338	9.03933	8.82486	10.0474	9.33354	8.32979	7.95366	4.52029	5.71936	6.1044	5.66544	4.67822	5.33221	4.56209	4.6405	4.80613	5.03805	5.22964	4.82962	5.45686	4.51905	4.6988	4.97406	4.36233	5.36684	5.31065	4.93749	5.64339	4.84114	5.93656	7.31455	6.01446	4.62077	5.36402	4.95214	2.6567	4.8007	5.42887	5.38754	6.00772	5.75748	7.99993	7.47975	4.85149	6.57066	5.71203
BC042374	7.16454	7.15959	6.94858	7.44039	6.81341	6.21874	6.59597	6.46038	6.37241	6.47548	4.76809	4.88796	4.39295	3.46279	3.97868	4.81748	4.32056	4.3048	4.33084	3.98256	4.52662	4.29192	4.31431	4.58954	4.41239	4.55886	4.06073	5.82921	4.64438	4.2863	4.67266	5.41948	4.6149	4.52344	4.76804	4.69777	4.68668	4.52584	4.30412	4.51417	4.94597	4.29016	4.22236	3.88381	4.08044	5.23304	3.97487	4.10736	4.5963
GFPT2	10.8654	11.2217	10.0968	10.0431	11.1158	10.7529	10.3473	10.3834	10.5018	9.20654	6.1	6.94022	7.2061	6.41584	6.61572	6.84635	7.65371	6.98076	7.02945	7.05129	6.6179	6.16213	6.44049	6.62823	7.61364	6.45431	6.75396	7.52709	6.70498	7.28563	7.43529	8.38034	7.69662	6.62073	7.21156	6.75437	7.19856	7.18208	4.86519	7.3164	7.36336	6.47774	6.96138	8.51011	7.2036	7.96124	7.15639	8.33017	6.19032
FCAMR	7.85997	8.43094	7.39472	7.55914	7.33837	7.16087	7.36978	7.20146	7.39724	7.90162	3.67189	3.60743	3.42807	4.14153	4.66268	3.98384	4.30408	3.65578	4.2623	4.55714	3.90324	4.40272	4.5872	3.82896	4.91939	4.06543	3.8218	3.88238	4.12293	4.89904	4.90779	4.96863	4.05066	3.90794	4.18069	4.62192	4.58662	4.23286	2.38957	4.51111	4.54669	4.79075	4.16327	5.50556	4.38347	4.96959	4.22543	4.87981	4.32285
ADIPOQ	7.88448	8.54942	8.33078	8.29597	8.81548	8.71641	8.35005	7.73214	7.06962	7.37498	4.25303	4.26678	5.154	4.90338	4.64939	4.38819	4.25682	4.33993	3.9202	4.81137	4.64866	4.30185	4.29249	4.50048	3.98356	4.03376	4.8157	4.37144	4.5635	4.79583	4.07357	4.27908	4.60462	4.112	4.51778	4.02509	4.25802	4.24768	3.54206	4.07028	4.78614	4.55423	4.3134	3.66761	4.18154	4.08298	4.94762	5.13829	3.82605
SETD5	6.19032	6.51553	6.656	6.68578	6.70788	6.65713	6.47098	6.51337	6.51697	6.73204	9.24231	9.32115	9.09897	8.37847	9.24672	9.29696	9.32927	9.15368	9.54744	9.24883	9.17542	9.34125	9.10505	9.0623	9.21277	9.02084	9.34675	9.48691	9.19005	9.16015	9.33831	9.25861	9.25869	9.20583	9.20388	8.88242	9.04499	8.75613	7.54009	9.07275	8.85889	7.96291	9.17231	9.26821	9.26932	9.14204	9.26911	9.23096	9.25991
GRHL2	6.34276	5.68171	6.89873	6.82048	5.04409	5.5775	5.03095	5.69518	6.63053	7.41015	7.95214	8.75835	7.42523	7.1183	8.1613	8.67429	8.38379	8.02603	7.37996	8.7688	7.2132	8.77139	7.88952	8.79258	8.10253	8.81576	7.90683	8.1066	8.33628	7.93885	8.43958	7.74943	6.94662	8.63207	8.3664	8.35118	8.28784	9.14029	7.86369	8.90356	8.04275	8.8512	7.78932	6.90698	7.47853	7.59745	8.36873	7.42564	8.19728
ESRP1	8.15141	7.77216	8.85478	8.47419	7.02705	7.95096	8.07008	7.68121	9.10919	9.2095	10.4528	10.4056	9.36024	10.3824	9.7295	10.146	11.2292	10.6098	10.0914	10.9805	9.24285	10.1031	9.67632	11.0785	10.0227	10.6572	9.91751	9.88721	10.7499	9.60031	9.61652	9.70896	9.36072	9.67949	10.1541	10.6229	9.66834	11.5456	9.99996	10.3009	9.72257	11.0704	9.65053	9.41126	9.28152	9.19205	9.90806	9.61888	9.76597
SYNPO2	7.68972	8.53964	7.78698	7.81308	8.45811	8.94244	8.44724	7.70303	7.56318	8.39687	6.0356	6.11486	6.18811	6.42394	6.1888	6.48889	5.93391	6.34334	6.26799	6.07417	6.1168	6.40098	6.13448	5.97105	6.50953	6.24067	6.27583	6.66422	7.3196	5.83976	6.51432	7.03545	6.4367	6.3388	6.42277	6.07747	6.13295	6.1663	4.59777	6.27878	6.59476	8.59446	7.12219	6.63039	6.64574	6.9834	6.25476	6.94626	6.32886
KCNH2	5.82638	5.74994	6.00213	5.72112	5.75187	5.40387	5.0525	6.25043	6.8021	5.9867	10.0657	8.26081	8.15533	8.71944	8.34629	8.62845	9.10388	8.73441	9.15618	9.68436	8.22829	8.72144	8.76321	8.96291	8.74472	8.5918	8.26087	9.25012	8.78934	8.09476	7.7457	8.7114	7.95344	8.52588	8.23139	9.53925	9.34957	9.54032	7.75498	8.76627	7.93662	9.15176	8.04361	7.76317	8.31966	8.31838	8.6809	7.9568	8.02906
SLC26A4	7.04816	6.77656	7.18952	7.02078	7.80414	7.98254	8.20771	7.73186	7.74847	7.8984	4.33185	5.12243	5.0249	4.87891	4.73056	4.07061	4.14831	4.50437	4.5471	3.87633	4.09855	4.29416	3.94577	4.12028	3.75035	3.93371	4.20634	4.59169	4.11959	4.30106	3.86707	4.8089	4.46572	4.78278	4.23986	4.62698	4.04771	4.23961	7.6786	4.02906	4.14154	4.43388	4.56676	4.79713	4.51856	4.42807	4.79634	3.89168	4.02149
LZTS2	6.68083	7.04169	7.10559	7.02801	6.71743	6.83758	6.58469	6.55295	6.49554	6.8617	8.77603	9.08182	8.95741	7.41838	9.06776	9.45656	9.41841	9.01463	8.98609	9.06276	9.10084	9.08553	9.49985	9.59636	9.09208	9.51482	9.1709	8.93191	9.21699	9.26205	9.1606	9.19079	9.36855	9.35378	9.44358	9.32425	9.37255	9.36752	7.5015	9.52717	9.64433	7.30313	9.37544	9.29044	9.16627	9.63583	9.25633	9.41732	9.41857
LRRN4	7.42514	7.61508	7.56281	7.92549	8.8291	8.93135	8.85309	8.82611	8.70617	8.47587	6.01553	6.64705	7.35844	5.9376	6.72277	7.03702	6.10799	6.86859	6.53311	5.95732	6.19231	6.47007	6.54864	6.10029	6.56309	6.0935	7.19443	6.89297	6.20714	6.94393	7.13633	6.9758	7.42642	7.13819	6.73109	6.63784	6.31202	6.02404	3.90716	6.98886	6.99065	6.24775	6.27	7.04916	7.0788	7.71165	6.519	6.88221	6.81051
SPRR2C	8.02809	7.78562	7.38074	8.07893	7.58774	7.07142	6.3653	7.20601	7.22268	6.89604	5.59971	5.46298	6.52405	5.44186	5.50403	5.54831	5.31261	5.59841	5.71614	4.97237	5.62978	5.67243	6.04374	5.54723	5.50805	5.40381	6.09097	6.23816	5.19161	6.20577	5.94917	6.0954	7.00182	6.26375	5.69936	5.58825	5.72475	5.41631	1.41715	6.11124	6.3352	5.37947	5.67463	5.91299	5.98945	6.97471	6.10771	6.03199	6.09005
ILDR2	8.27072	8.62778	7.70035	8.18168	9.42172	9.52306	9.16153	9.8799	10.4307	9.56079	6.47993	5.42261	5.30811	5.41054	5.67564	6.54081	7.1677	5.2407	5.54876	6.02083	6.10351	5.45776	5.44396	5.24764	6.22684	5.71867	6.32373	5.29298	5.88238	5.40763	6.67663	5.6273	6.16839	5.70776	6.20172	9.65192	8.02086	5.24352	5.69869	5.1638	8.08696	5.1903	5.05699	4.93732	5.77235	6.40537	7.06672	7.22645	6.83007
RTP3	5.08768	4.87532	5.02608	5.17506	4.48453	3.79216	4.02734	4.28179	4.15043	4.27	7.6805	7.91627	7.60145	6.97117	7.74847	7.90115	7.84735	7.86545	7.50561	7.31222	7.47158	7.628	7.77702	7.8336	7.56631	7.62241	7.63517	7.54768	7.48871	7.7857	7.47774	7.69887	7.65375	7.62868	7.92079	7.79858	7.94448	8.14339	6.62277	7.7312	8.06454	6.96464	7.94297	7.72669	7.6448	7.78769	7.96603	7.77151	7.77847
CCDC60	12.353	13.5005	13.3189	12.8262	10.7237	9.21189	9.4169	10.4111	9.59196	10.0898	7.08382	6.91523	6.57092	7.2608	6.98517	6.50954	7.34595	6.68332	6.42565	7.2648	6.59753	6.91872	7.57151	7.00821	6.96243	6.85323	6.54137	7.1667	7.0914	6.4657	6.84952	6.67326	6.39847	6.98518	6.51309	6.63956	7.072	6.8873	6.61357	6.58484	7.31783	7.20916	7.26364	5.67503	7.26294	6.1839	6.79036	6.91814	6.71821
FCN1	8.5512	6.56123	6.47777	6.34866	9.82039	7.64083	8.734	7.32201	7.5679	6.63805	5.52654	5.37272	5.67207	5.18048	4.88911	5.95305	5.28494	5.0068	5.4016	5.32552	5.29244	5.30185	5.46786	6.13142	5.181	5.14785	4.8016	5.48552	5.14563	5.77597	6.40936	6.48199	5.54934	5.51241	5.74033	5.62787	5.15077	6.7257	3.91842	5.53792	5.89302	5.2914	5.32881	5.76747	5.64433	5.60489	5.17524	5.96113	5.24947
RP11-324L17.1	6.12255	6.24712	6.35046	6.88206	6.55339	6.56623	6.14218	7.16732	7.0465	6.5606	4.8719	5.38399	5.44406	5.0708	4.78995	5.61802	5.48464	4.6563	5.10887	4.84952	5.01649	4.74475	5.2464	5.22446	6.24586	5.28062	4.91506	6.95728	5.31252	5.59145	5.16656	5.26323	6.0396	5.34237	5.06546	5.34667	5.30676	4.94474	3.11295	5.25741	5.74728	5.34055	5.36079	5.27138	6.11305	4.64606	5.59839	5.37473	4.98357
MGP	7.42745	8.27371	7.91208	8.16004	10.3581	9.69356	10.0073	9.9332	9.29693	9.48701	5.47399	7.18939	6.95439	8.23754	5.17142	7.41268	6.78542	5.73857	4.90377	4.99768	5.33595	4.81503	4.81746	5.17548	7.07552	5.14554	4.93312	6.19805	6.33477	5.4221	7.62703	5.85506	6.24118	6.73081	5.86813	7.5578	5.01515	6.60769	4.54828	5.14668	6.34424	6.85299	6.79379	7.24738	7.9447	7.00293	6.30853	7.75874	5.42114
CHRDL1	9.83602	10.7881	8.66008	9.10496	11.7633	11.4928	11.245	11.4881	11.0911	10.5588	8.10467	5.71986	8.06749	6.42863	5.92753	7.22673	7.53727	6.17724	7.11576	6.12168	9.59668	5.96934	6.03799	5.86314	6.24515	6.51351	8.29826	6.16428	6.70248	8.15863	7.46598	7.42639	7.96208	7.86586	7.34903	8.55745	7.4657	5.56982	3.7422	5.42875	5.49012	5.80533	8.45051	5.98195	6.81502	6.36155	6.39221	6.72166	8.32682
ATF4	9.5694	10.5035	9.54831	9.5217	10.3986	10.5119	10.593	10.5397	10.9051	10.6499	12.923	12.476	12.2407	12.5562	12.8419	12.3505	12.8049	12.9389	12.5136	12.5364	12.2777	12.6655	12.1738	12.4976	12.7101	12.408	12.2972	12.5996	12.4531	12.1521	11.8347	12.2824	11.9674	12.2405	12.4569	12.453	12.6936	12.7358	10.5344	12.3594	12.1904	12.6205	11.6373	11.282	11.5502	11.308	11.8739	11.4624	11.323
PLEKHH2	6.66189	6.96683	6.82321	7.3143	8.60036	8.7894	9.12777	9.28538	8.04533	8.41486	5.5403	5.07298	5.45261	5.58331	5.13384	5.08391	5.38959	4.84771	4.87006	4.64059	5.49489	5.88524	5.27744	6.24093	5.0967	5.45913	5.06238	5.04746	4.93799	5.44809	5.86019	5.29652	5.32409	7.26364	5.38759	5.3363	5.09576	4.90659	2.55121	5.38009	5.58597	6.47205	5.0552	5.11004	5.20709	5.73337	6.02556	5.44827	5.08822
LOC283692	2.94455	2.71117	3.60565	2.91185	1.99079	0.457312	2.09716	2.2304	3.0737	1.32999	6.56791	5.90955	6.41282	6.1508	6.45801	6.25394	6.65773	6.58966	6.78288	6.26209	6.1633	6.35239	6.2317	6.46127	6.30685	6.28318	6.36646	6.38386	6.09403	6.32147	6.32409	6.48491	6.15941	6.17051	6.73408	6.10215	6.3119	6.32322	6.32066	6.56576	6.65656	6.47317	6.60388	6.82647	6.54271	7.34544	6.46778	6.23075	6.74533
SAPCD2	6.69486	6.85671	6.82538	6.77224	6.72473	6.41258	6.54905	6.4062	6.45029	6.66796	8.6678	8.57363	8.05113	8.94203	8.38009	7.89259	8.09867	8.27628	7.75382	9.53452	8.29773	8.30877	8.38289	8.4884	8.06829	8.67384	8.2136	8.0721	7.92901	8.43836	7.61936	8.11771	8.19703	8.48504	7.66854	8.64658	8.97788	8.96351	7.34046	8.11593	7.6636	8.10685	7.50393	7.41572	8.03627	7.57587	7.8461	7.82738	7.98824
NAP1L3	9.0976	9.06616	8.54896	8.97132	9.06093	10.3055	8.80394	9.30789	9.66296	10.2377	4.92684	5.09583	5.81197	6.3474	5.50971	5.98837	5.95209	6.15282	5.02076	6.33701	8.74979	6.30952	5.44636	6.30695	7.36338	7.6654	6.6746	5.53975	6.85729	5.12153	5.27105	6.12874	6.25408	6.84194	5.31997	4.80251	6.50303	5.82547	3.38319	4.32213	5.24721	9.04116	7.22332	4.0788	6.56721	6.90245	5.9622	7.77463	6.57873
PABPC5	5.62847	5.87994	5.51023	5.98922	5.70114	6.12601	6.54673	6.65653	6.49141	6.15834	2.45109	3.06767	2.81501	2.84545	1.90234	3.71298	3.28214	2.50534	2.92846	2.57226	4.25506	3.5999	3.20769	3.69803	4.6926	4.76309	2.60888	2.61965	2.86609	3.60056	1.5894	3.28014	3.43414	2.98698	2.9397	3.22031	4.2423	3.65066	0.622212	3.00033	4.15837	4.76604	2.08011	2.73898	2.44083	4.30615	2.89494	3.97141	2.5871
LYVE1	9.1445	5.62119	5.31891	5.48813	9.23106	6.73562	8.87949	6.78507	7.90064	6.19144	5.06269	5.3656	5.07047	5.70139	5.16631	5.28319	5.20348	5.36234	5.17411	5.10575	5.28139	5.08535	5.43774	5.26765	5.21679	5.21506	5.1808	5.36351	5.35628	5.17656	5.1768	5.25743	5.22486	5.45408	5.18415	5.28458	5.24841	5.29477	3.91071	5.25035	5.39155	5.52911	5.24596	5.28785	5.1247	5.13687	5.16608	5.18795	4.99463
IGFBP6	8.7414	10.5276	9.24578	9.1816	10.4444	10.6795	10.9538	10.2103	11.8267	11.2179	6.21402	6.24276	6.71661	7.30899	7.7313	7.22354	6.77043	7.27463	5.99948	7.85372	7.60249	5.92365	8.72163	5.63207	6.95269	8.47266	7.40577	6.03338	5.93544	8.92254	6.37672	6.73604	7.69228	6.16298	6.6447	6.41042	6.49742	6.38662	4.97888	5.59122	6.55818	6.37604	8.32002	6.55724	8.11851	7.83838	7.08139	7.40096	6.40929
MB21D1	6.29544	6.63909	7.0094	6.9315	5.71317	5.56397	5.67986	5.38945	5.89286	5.56619	11.3161	10.8069	10.0915	11.3369	11.0467	10.4377	11.9393	10.8935	10.5	11.9068	11.0834	10.8091	11.0509	11.3971	10.5136	11.3497	9.70808	11.0714	11.4596	10.9186	10.1468	11.2111	10.3916	11.0186	10.9637	11.7011	11.596	11.7696	4.38533	11.057	11.729	11.9906	10.7675	9.55433	10.1543	9.74934	10.9769	10.403	10.2114
PAX8	8.98421	9.61403	9.32186	8.95009	7.57981	7.46876	7.35127	7.80367	7.15785	7.55742	9.92461	9.69319	9.39329	10.0273	9.66731	9.37547	9.66631	9.8387	9.37976	10.1068	9.72161	9.54837	9.56927	10.0788	9.11484	10.3455	9.21696	10.032	9.83263	9.257	9.15564	9.37181	9.22085	9.49481	9.64599	9.99098	9.84426	10.204	7.54211	9.68575	9.1277	9.6232	9.39137	9.0731	9.31444	9.11598	9.41155	9.34984	9.59999
HLF	7.89981	8.81753	8.04751	7.86696	6.94465	7.9815	7.40019	6.43183	6.49224	8.05004	6.27286	5.97334	6.47516	6.13908	5.95718	6.66777	5.74666	5.8224	6.14042	5.79247	6.04396	6.12942	6.32718	5.59752	6.15855	5.61903	6.9275	6.4331	5.88291	5.99764	6.50057	6.49568	6.48505	6.33533	6.15309	5.68791	5.83219	6.17089	2.99069	5.97442	6.10253	6.41538	6.41896	6.30762	6.31416	6.92081	6.08813	6.5363	6.20772
C16orf45	4.72643	5.26551	5.21696	4.82202	5.78575	6.16596	6.42074	5.8692	5.5495	6.21806	9.50338	9.39415	9.26514	8.56864	9.37105	9.52336	9.64884	9.58354	9.28686	9.70138	9.18708	9.52595	9.59354	9.67804	9.42428	9.60587	9.29518	9.61333	9.54216	9.386	9.3536	9.55396	9.6497	9.45154	9.46193	9.62377	9.60896	9.6123	7.99243	9.58171	9.74082	8.48143	9.56298	9.42195	9.49415	9.77315	9.5575	9.49884	9.64685
GNG11	7.146	8.78643	8.15607	7.82064	9.75946	9.81211	9.98827	9.33219	8.54688	9.64897	5.66904	5.69535	5.26816	6.54	5.54382	6.44443	6.24173	5.32155	4.52752	4.62903	4.45511	5.01529	4.05225	4.88951	7.1326	4.90986	5.00604	5.74359	4.88491	5.68582	5.67852	5.09247	5.5891	5.06005	5.88376	5.55671	4.71659	4.3978	2.40112	3.90021	6.85271	8.4117	6.05733	6.34821	5.74988	7.24424	6.60288	7.16782	5.99782
BMP2	6.33702	6.57015	6.67756	6.86789	7.71973	8.37418	8.4555	7.56595	8.18632	7.55053	5.69337	5.67413	5.88185	5.50993	5.63907	5.63964	5.61376	5.77908	5.45327	5.62962	5.64822	6.05356	6.09758	5.90203	6.34418	5.74817	5.80796	6.1577	5.87746	5.80406	5.83257	5.83073	6.12833	6.24639	5.6835	5.86717	5.76942	5.74562	3.14824	5.91468	6.10114	6.02058	5.69933	6.15948	5.63965	6.27683	5.5978	5.8497	6.0924
LYPD6B	7.19503	6.41683	8.14862	6.85151	6.32548	6.84364	7.29078	6.60813	7.5619	7.90861	10.3685	9.0458	8.48768	11.0941	10.227	8.64015	8.89074	9.1043	8.46681	10.3455	9.22072	9.46927	10.582	10.4166	8.82594	10.7876	8.90815	10.5543	11.3399	8.42759	9.76357	8.79812	8.75511	8.49905	9.60259	10.573	8.49965	9.59545	8.30841	9.11377	8.64912	8.95549	9.68427	8.55874	8.58459	9.04348	8.28473	9.18304	9.88655
PTGDR	5.84896	6.46554	5.55412	5.37213	6.31118	6.9912	6.40758	5.98933	5.96804	6.57957	5.19115	5.13268	5.08253	4.99498	5.47456	4.91247	5.25349	5.27899	5.27897	4.9312	5.15501	5.03505	5.10144	5.06109	5.16963	4.87076	5.66735	5.25227	4.90455	5.09051	5.23796	5.40025	5.59171	5.07999	5.04326	5.03423	4.9817	5.05294	5.85669	5.10156	5.30557	5.34697	5.20492	5.56138	5.52242	5.56508	4.89965	5.9631	5.04983
SCN7A	6.01402	6.96657	6.60813	6.23037	5.59426	7.70969	6.29544	5.24121	5.92043	6.99303	3.97551	4.5295	4.44026	5.54626	4.08972	4.45599	4.74247	4.6891	4.37599	3.87481	4.91956	4.70383	4.17965	4.39704	3.90746	4.39694	4.03956	4.21524	4.38204	4.23744	4.97213	4.36521	4.28635	4.21959	4.3779	4.14437	4.19392	4.23007	2.54577	3.95102	5.32879	5.82879	5.2016	4.8166	4.70047	6.69541	4.57915	5.56728	4.84224
GATA6-AS1	7.82479	7.82962	7.52995	7.89941	8.9111	9.2377	9.47598	9.40026	9.40929	8.72545	6.4421	7.50196	6.60369	6.94645	6.07602	7.35004	7.37173	6.9646	7.90829	7.66828	6.1972	6.0167	5.92971	6.07889	6.59683	6.0408	6.9155	6.65012	6.10569	6.7933	7.56674	7.01874	6.95151	8.09884	6.46572	6.4612	5.89801	5.96401	7.19145	6.4019	6.12322	6.96719	6.48978	7.443	7.78534	8.04493	7.81987	7.01268	6.55749
SMIM22	5.33047	5.53189	5.90385	5.32084	5.06586	4.7779	4.73869	4.92258	5.52396	5.00127	9.69599	8.85885	8.47616	9.75671	8.47314	8.26626	7.43211	8.97324	8.05185	7.05551	6.6423	8.21976	8.11868	8.21354	8.08877	7.43683	7.95696	8.48424	7.72404	8.27617	7.82729	7.80829	8.30932	6.20931	7.89219	9.51288	8.19287	8.38744	6.62766	8.58195	7.27762	9.64288	8.74009	7.51128	7.82868	7.64297	8.10754	8.07801	6.59919
PDPN	7.1821	7.26008	7.56368	7.63235	7.94459	8.05173	8.227	8.36918	7.89483	7.57207	5.72526	5.76635	6.39711	6.01866	5.99696	6.70024	6.58949	6.12062	6.16191	6.13076	6.76019	5.9249	5.6306	5.78825	6.8381	6.16364	7.19234	6.64175	5.81251	6.62528	6.57557	6.6386	7.04066	6.56798	6.20566	6.5776	6.68261	6.10816	5.68086	5.79131	6.03025	6.56919	6.29622	6.51381	6.65823	7.26566	6.70811	7.35479	6.30766
CD28	7.58445	6.57392	6.90486	6.6565	7.17406	6.35515	7.05413	6.51126	6.71538	6.34872	5.14925	5.00445	5.31915	4.94579	4.91273	5.09078	5.36726	5.0429	5.18318	5.48304	5.1289	5.0108	5.19473	5.2963	5.19359	5.24814	5.15997	5.35852	5.09542	4.91286	5.1733	5.45347	5.32545	5.01656	5.13567	5.17362	5.11499	5.19115	3.18923	5.12905	5.58212	4.97065	4.9589	5.40096	5.22794	4.85122	5.08768	5.31741	5.01683
SEMA5A	8.35315	8.69282	8.22726	8.86822	9.22727	9.32821	9.6004	9.77592	9.47665	9.4262	6.68686	6.41716	7.80624	6.31267	6.49311	6.63618	6.95061	6.49819	6.07767	8.57201	7.04119	6.64348	6.35873	6.91005	8.05379	7.00381	6.94694	6.65592	6.50496	6.53955	6.57812	8.50109	6.96753	7.62777	6.67438	7.3561	6.66349	6.36325	6.26406	6.50129	6.9461	8.09906	6.59787	6.87639	6.41757	6.56034	6.89252	7.24882	6.16657
RP11-305O6.3	6.04913	5.88558	6.4404	6.76464	8.18947	8.72596	8.44634	8.25218	7.9254	7.72399	4.74096	5.0427	4.64839	4.35876	5.35112	4.71214	5.56838	4.64508	4.45277	6.91743	5.46316	4.35038	4.76277	4.30053	5.29561	4.80304	4.74387	4.84836	4.90508	4.39786	4.77427	4.87064	4.77065	6.00364	5.38605	5.49179	4.94385	3.9844	3.01464	4.75118	5.8024	5.23996	4.77098	4.61572	4.77095	5.16711	5.16844	6.00573	5.40867
LOC101927247	6.83874	7.18238	7.15778	7.04413	7.87238	6.87644	7.90569	7.37962	7.55793	7.76684	4.16306	4.3115	4.83829	3.89867	3.83331	4.42833	3.84983	4.3411	3.95119	4.1324	3.92207	3.82106	4.39315	4.49215	3.87934	4.23547	4.60585	4.87951	4.07178	4.45563	3.74678	4.95978	4.89424	3.42062	3.96369	4.4804	4.47007	4.74279	2.51478	4.18202	4.39752	4.55783	3.75869	3.76469	4.08412	4.46881	3.93225	4.1329	3.4053
SLC31A2	8.69283	8.42291	7.68959	8.37198	9.36991	8.82692	9.74022	9.05096	9.41431	8.60689	7.57085	7.48838	7.22157	7.15655	7.57894	7.32204	7.47062	6.81019	7.01008	6.55772	6.99456	6.79638	7.34803	7.12385	7.42334	6.65742	7.20196	7.56107	6.67981	6.8401	8.08291	7.49679	7.12366	6.40123	7.10755	7.42061	6.8392	7.27589	4.95267	7.40392	7.52382	7.17892	6.58936	6.98699	7.32869	7.72016	7.48785	7.42297	6.43531
SOX9	6.23532	6.10654	7.82648	6.34963	6.66632	7.55702	6.17919	6.83405	7.73283	6.19322	10.7117	8.50979	8.72364	10.6979	8.89538	9.34153	11.0147	8.64681	7.76899	9.56711	8.76215	9.09401	10.0751	8.26081	7.67194	8.53815	8.01076	7.83629	10.4771	8.41751	9.27686	8.95131	8.32844	10.1544	8.74447	11.0643	9.18213	9.34933	9.61132	7.35577	7.32952	10.8181	7.33414	8.51765	8.81858	7.91119	9.81682	9.00305	9.62149
SLC4A2	5.25158	5.30567	4.87563	5.57417	6.12379	6.18818	5.85382	6.20834	6.6742	6.3878	9.98778	10.6203	10.5184	8.4866	10.3806	10.7005	10.5661	10.3357	10.4901	10.2057	10.4513	10.4695	10.6593	10.5331	10.366	10.5202	10.2617	10.3104	10.4977	10.6113	10.5872	10.4907	10.6491	10.6902	10.7007	10.442	10.6052	10.3082	4.60849	10.5712	10.5273	7.59824	10.6641	10.6073	10.6246	9.6859	10.6358	10.6924	10.7711
SORD	7.61276	7.1553	7.193	6.96132	6.91602	7.03684	7.15723	7.01075	6.99473	7.19632	9.75375	8.31973	7.7044	8.24467	8.35835	8.75317	8.65474	8.32422	8.10189	8.79557	8.18099	8.75596	8.62837	8.85328	8.04707	8.63542	8.45215	7.98174	9.25814	8.45447	8.60442	8.34939	8.24934	8.21707	7.9902	7.61091	8.27951	8.74574	8.63216	7.9997	7.8662	8.79071	8.62301	8.06995	8.43264	7.84609	8.12512	8.16975	8.28666
NOTCH1	6.4404	6.04148	6.71554	6.21373	5.87887	5.57221	5.75452	5.75251	5.59107	5.61442	7.46059	7.32543	7.54845	7.1139	7.617	7.67274	7.4942	7.66205	7.49067	8.00189	7.66825	7.70655	7.50639	7.44137	7.63771	7.77054	7.63221	7.48055	7.56764	7.63457	7.48578	7.73126	7.67539	7.53636	7.62143	7.56672	7.68494	7.8472	5.02449	7.70129	7.56449	7.52084	7.38921	7.58246	7.72474	7.73905	7.48678	7.43054	7.68627
TMEM150C	7.44653	8.35337	7.24596	6.98603	6.92567	8.53068	7.09844	6.54578	7.54976	8.44514	5.49835	6.20791	5.36438	5.69338	4.90202	5.86883	5.54178	5.23419	4.75501	5.70513	5.4348	5.40232	5.25063	4.93724	6.00138	5.09929	5.51627	4.91257	5.27224	5.1356	5.53698	5.76897	4.71847	4.73709	5.63821	4.87987	5.31229	5.53689	5.2825	4.60242	5.41564	7.3225	5.31393	5.53777	5.36451	7.18494	6.50512	6.36406	5.63526
ALDH1A1	9.45906	8.78444	8.04613	8.49671	8.93259	9.42523	9.46279	9.58701	10.8284	10.4611	6.00581	6.76918	7.01073	6.36032	6.13395	6.7796	6.36429	5.79652	5.71273	6.05294	6.69479	6.09161	5.94032	5.45609	7.48469	7.59659	6.1045	6.15777	5.64113	5.83392	6.91448	6.11008	6.45816	5.48422	5.89158	5.86587	5.14367	6.52345	2.28273	6.48271	7.12133	8.16517	6.44487	6.99161	7.50621	7.14776	5.98204	7.31853	6.46411
LZTS3	9.41843	9.92556	9.30882	9.44243	8.13155	7.90999	7.93724	7.63965	7.69381	8.01681	10.9321	11.2798	11.1711	10.23	10.9881	11.0964	11.2977	11.0549	11.0873	10.9961	11.2916	11.2921	11.5406	11.4777	11.2742	11.4408	11.1864	10.9629	11.3557	11.1746	11.3216	11.481	11.4571	11.3214	11.3786	11.5136	11.3603	11.4041	8.20371	11.4384	11.3354	10.5284	11.4663	11.4639	11.2882	11.3694	11.3168	11.3304	11.337
OMD	6.22262	7.10891	6.08049	8.58235	7.89777	8.1622	8.42863	8.00187	6.05908	5.65589	4.65761	4.58665	5.5211	4.86137	4.84417	5.32254	5.5295	5.16337	5.36928	4.89917	4.67791	4.85559	5.09944	5.04047	5.52948	4.6039	5.30195	6.20079	4.63636	4.61233	5.3636	6.08797	6.06331	5.13106	4.81442	4.87976	5.08133	4.81507	2.25256	5.12163	5.34612	5.1663	5.45437	6.21291	5.8224	6.74584	5.25121	6.78912	4.76696
SPRR3	7.491	8.52345	7.11315	7.68295	7.08585	7.81865	6.6146	7.84101	8.48249	7.7737	6.59432	6.47563	6.76866	6.7053	6.68979	6.84996	6.63719	6.53876	6.9208	6.43409	6.65983	6.71431	6.59524	6.39338	6.72196	6.14752	6.85788	7.11622	6.51541	6.59777	7.09168	6.83909	6.87226	6.76257	6.95543	6.65067	6.68009	6.59463	4.95444	6.78544	6.70896	6.57006	6.9946	7.28195	7.13858	7.19789	6.87314	6.99583	6.87019
SLC52A2	6.73232	6.44385	6.94352	6.81397	7.11736	7.09245	7.01302	7.05857	7.37648	6.90282	8.88479	8.90256	8.1814	9.73954	7.74686	8.42655	9.35411	8.79505	8.41962	8.96567	7.84046	9.02244	7.59256	9.74621	8.63512	8.72283	8.36975	8.64239	8.89524	8.62289	7.81883	8.44895	8.41477	7.87899	8.65129	9.37472	8.87868	9.70329	8.6104	7.88829	7.80451	9.9404	8.0428	7.45669	7.22116	8.41853	8.62673	8.22278	8.24327
FABP4	7.00661	7.13154	7.48907	8.24573	8.278	9.07662	8.19853	7.79121	6.96875	7.51309	5.33839	5.70397	5.74363	5.46124	5.45457	5.65403	5.10794	5.70591	5.5787	4.9823	5.36394	5.16503	5.35218	5.41537	6.14982	5.47057	5.51373	5.33195	5.29176	6.57699	5.69789	6.19495	5.5734	5.30458	5.54709	5.37654	6.00225	5.3456	3.60156	5.58355	5.97644	5.09152	5.25275	5.83692	5.54954	5.52557	5.30168	7.04268	4.93499
FLNC	8.02345	9.14296	7.75593	8.4682	9.69678	9.62962	9.14168	9.81707	10.0494	8.82744	6.58218	7.10871	7.15522	7.58628	6.53382	7.10341	7.114	7.11272	7.90454	7.16766	7.49084	8.15277	6.89977	6.95878	7.71537	7.61833	7.82819	6.57283	7.02382	6.60341	7.11547	6.65412	7.34245	6.59917	6.81976	6.45462	7.02177	6.97091	5.21942	6.22649	6.53485	6.87927	7.43233	7.01446	7.0217	7.05664	7.31394	8.01446	7.09976
ERN1	7.89962	7.56499	7.46788	7.81547	8.43743	8.45982	8.52085	8.31101	8.45123	8.09697	6.85563	7.81215	6.8607	7.01947	6.58574	6.9318	6.98849	6.71176	6.98887	7.29471	6.60188	7.06375	6.74641	6.99947	7.12832	6.67742	7.12312	6.75934	6.5567	7.05652	7.08099	6.66001	6.82643	6.71675	6.82364	7.42973	6.73078	7.17411	6.434	6.9938	7.005	6.72688	6.8131	7.61041	6.6127	7.24633	6.6983	7.1523	7.35675
EOGT	7.77662	7.4637	7.5646	8.31818	8.356	8.80666	8.37266	8.78453	8.78403	8.09783	4.38004	5.90217	4.33632	5.05676	4.66374	5.19766	5.3518	3.69347	3.82829	5.47361	5.00037	5.08381	5.20676	5.07634	6.05498	4.83598	4.71904	5.17151	3.88138	5.38262	4.9944	5.05983	5.7691	4.7246	4.05116	5.1729	4.65231	5.86078	4.13476	5.29185	4.93482	5.15412	3.94877	4.29998	3.82036	5.75082	5.24305	5.81198	4.3589
CHTOP	8.03845	8.49539	8.17905	8.12905	8.95838	9.168	8.91447	8.76935	9.09938	9.04206	10.5123	10.2957	10.1234	10.0706	10.3705	10.392	10.5669	10.2633	10.2526	10.628	10.4421	10.3647	10.4558	10.3718	10.3214	10.7965	10.2095	10.2789	10.4952	10.4335	10.1751	10.2562	10.2458	10.4025	10.2437	10.5624	10.5978	10.3756	8.42369	10.3583	10.2658	9.85472	10.4091	10.2232	10.3085	10.3514	10.5006	10.4308	10.4347
GOT2	6.66123	7.74988	7.24877	7.35341	8.32511	8.77177	7.92082	8.1954	8.90856	8.72113	11.2861	11.4713	11.073	10.8215	11.4018	11.4381	11.4622	11.463	11.2246	11.2161	11.3111	11.3256	11.5367	11.4029	11.4103	11.5857	11.2228	11.4338	11.457	11.4075	11.1988	11.6707	11.1999	11.3378	11.4315	11.467	11.4142	11.3643	6.88948	11.5664	11.6148	10.4832	11.5756	11.4482	11.3805	11.5633	11.4492	11.3766	11.4037
P2RX7	8.22845	7.89371	7.17283	6.95811	9.18358	8.8346	8.9304	8.12867	7.98035	8.48201	6.62102	5.93155	6.55105	5.93492	6.50632	6.62982	6.59662	5.83414	5.69659	5.74874	5.8473	5.95867	6.16301	6.06909	6.6456	5.64048	5.87482	6.26726	5.91786	5.86239	6.8989	6.0494	6.24622	5.71908	6.22538	6.32989	5.64321	6.65851	3.96453	6.07508	7.22574	6.86594	6.0395	6.02324	5.78051	6.84093	6.11734	7.15093	5.68723
KLHL14	6.61722	6.40457	7.63011	6.69728	5.24173	5.57521	4.95258	5.10757	5.17141	5.00642	8.33908	8.35539	8.289	8.96392	8.38231	8.51222	7.76217	8.86423	8.59722	10.0947	8.67724	8.85534	8.48118	9.92723	8.01527	9.50889	8.40061	8.15933	8.56528	8.88891	8.64982	8.29704	8.28186	8.41279	8.19026	8.05444	9.74229	9.94626	6.8583	8.77809	7.18131	8.39116	8.89409	7.9035	8.14679	7.96359	7.35708	7.99053	8.11751
OSR1	6.50216	5.73175	6.47585	6.40785	9.11946	8.76161	9.5453	9.3612	8.38754	8.14102	3.85344	4.21745	4.11537	5.03225	3.64114	3.38807	4.585	4.34055	4.55191	3.95611	3.94682	3.96729	4.24386	4.11033	4.39574	5.0185	4.31361	3.62882	3.63149	4.22702	5.83681	4.19134	5.4199	7.09803	4.86557	3.71979	3.97824	3.82797	2.17283	3.7723	4.10763	6.46205	4.47848	5.45556	4.7899	4.89231	4.75514	4.91167	4.62981
RANBP1	5.98327	6.43297	5.83301	5.88085	6.46833	6.59414	6.64228	6.22984	6.92913	6.65188	10.0601	9.56089	9.21929	9.945	9.7925	9.45058	9.86092	9.59951	9.28041	9.90689	9.26697	9.46404	9.3267	9.71818	9.61512	9.63078	8.90927	9.84646	9.76161	9.29532	8.70841	9.26933	8.99267	9.19926	9.2784	9.54076	9.57862	9.78605	5.96594	9.29313	9.49638	9.50123	9.05275	8.57979	8.8291	8.62505	9.10352	8.85284	8.67438
MAF	8.64938	7.7155	7.26547	7.34184	9.62924	9.28966	9.90961	9.68817	9.95845	9.11979	6.92753	6.43788	6.24553	7.40544	6.13597	6.73781	7.09597	6.09975	6.50168	6.63942	6.2645	6.41808	7.20316	5.73901	7.10913	5.28801	6.50083	6.85483	5.85119	6.15222	6.6465	6.47218	6.73512	6.93953	6.32307	5.89109	5.38492	5.73272	4.22579	6.00214	6.80029	8.22553	5.89323	6.72524	6.23042	7.00858	7.33242	7.91685	5.92674
AQP9	8.3384	10.0242	8.80424	8.79581	11.0922	10.7211	10.8761	10.6338	10.0878	10.4085	8.25759	6.9255	7.78132	6.63197	6.80625	8.84449	8.10334	6.77212	6.91957	6.16839	6.58379	6.57468	7.25866	7.68169	6.4292	6.58515	7.70525	7.2613	6.93448	7.03428	7.99689	7.83326	8.20396	8.70829	7.52647	7.15361	6.94045	7.64912	4.33194	7.13257	7.57716	6.30754	7.05272	7.59237	8.71633	8.4116	7.1529	7.39678	7.02022
WNT2B	8.6845	8.71705	8.38567	8.63016	9.18059	10.0219	8.24561	9.28102	9.67395	9.16831	7.52188	7.19877	7.50887	7.2841	7.59243	7.50641	6.97874	7.50997	7.42531	6.81776	7.35702	8.2617	7.50826	6.93896	7.28466	7.04318	7.60792	7.5673	6.97896	7.39765	7.54114	7.55229	7.49925	7.43462	7.39925	7.44096	7.28185	7.29559	3.73113	7.2435	7.62447	7.74348	7.64701	7.65897	8.17459	7.96389	7.95059	7.49825	7.93722
MTTP	5.62345	5.88307	5.69454	5.7913	6.52491	6.79455	6.44983	6.15899	6.05241	6.13222	4.22781	4.09321	4.22108	4.44748	4.29602	4.33677	4.04368	4.15385	4.12187	4.25402	4.5507	4.26941	4.50867	4.64724	4.7678	3.55271	3.89674	4.33262	4.18688	4.50677	4.23421	4.06651	4.64294	4.15177	4.70723	4.16448	4.36595	3.67531	3.71687	4.57574	4.12528	4.43924	4.44043	5.05584	4.92172	5.36732	4.16817	4.68318	5.09556
PAK1IP1	6.62792	6.68024	6.65603	6.71565	7.35605	7.67337	7.61046	7.46751	7.57974	7.31561	8.9071	8.83059	9.3115	8.24506	9.31094	9.15198	7.7953	9.30276	9.45789	9.64026	9.14503	9.28318	8.47157	8.89912	9.09382	9.09326	9.44191	8.627	9.0666	9.3309	9.01996	8.86296	9.21428	9.06477	9.23619	8.28593	9.33773	9.47195	5.98135	9.40918	8.77835	8.82694	9.02706	8.65339	9.10294	9.34086	8.94285	8.91739	9.28918
VPS52	9.56331	10.2631	9.55286	9.5487	8.57879	8.61098	8.52972	8.51695	8.31158	8.60885	11.3439	11.3704	11.1657	11.1383	11.3824	11.2095	11.4032	11.4501	10.9531	11.2394	11.2544	11.1512	11.3349	11.4782	11.205	11.3584	10.6926	11.3774	11.38	11.2425	11.0179	11.4726	10.9051	11.2168	11.2742	11.5431	11.5248	11.3693	8.08881	11.2864	11.5117	11.0056	11.2902	11.0939	11.2447	11.1987	11.3802	11.1535	11.2579
S100A13	7.57004	8.03599	8.44289	7.9425	7.8584	8.1218	7.98694	7.87265	7.8498	8.59533	10.4762	9.26132	9.71984	11.1773	10.4355	9.65457	10.1849	9.39849	9.4122	10.1229	9.25455	10.2767	10.3952	10.3952	9.30238	10.395	9.53895	9.85199	10.276	9.48907	8.88999	9.09853	9.11383	9.44806	9.38509	10.6866	8.99901	11.0715	9.11915	9.94596	8.78809	10.9101	9.50828	8.97101	8.82261	9.18734	9.86224	9.27434	9.46654
NEK2	6.04929	5.1631	6.35243	4.91769	5.19576	4.68972	4.45597	4.98092	5.63132	5.02982	8.06867	8.29697	7.07219	6.6602	8.12679	7.78271	7.55994	8.27775	7.57826	9.24838	7.93223	7.13353	6.97508	9.08937	6.38662	8.94421	7.50063	7.29778	8.5302	8.26631	6.03168	7.69666	7.49252	6.59312	8.08309	8.57037	9.01203	8.30093	6.10983	7.77818	7.15581	7.48145	8.12224	6.46627	7.66878	6.91026	7.2119	7.60438	8.45625
DPP10-AS1	6.61598	6.885	7.23789	7.29847	7.91471	8.36429	8.15166	8.57753	9.20914	8.60695	5.45693	5.49481	5.55567	6.13251	5.44136	5.36279	5.27396	5.32758	5.32897	5.61388	5.76412	5.62694	5.58792	5.20759	5.3444	8.18285	5.92141	5.06303	5.48439	5.23761	5.07596	5.49643	5.50985	5.76945	5.06876	5.1852	6.1149	5.1412	4.46016	5.50223	4.72304	5.97185	5.32735	5.38806	5.29773	5.46794	5.37025	5.679	5.19072
HMGB3	7.90523	7.58414	7.82161	7.36499	7.37892	7.85991	7.64998	7.93201	8.40205	7.93499	11.0295	9.15155	8.81634	9.58346	9.2398	9.53844	10.1093	10.1394	9.35288	11.5522	10.6813	9.13433	8.19315	10.975	9.31684	10.9547	9.79639	9.28864	10.0857	9.86439	8.50056	9.91794	9.46389	8.98547	9.90909	10.2686	10.0516	10.9313	8.4325	9.52428	10.0592	9.83987	9.02893	9.15653	8.56926	8.38227	10.1058	9.26157	9.56212
OLFML1	7.45322	8.48074	7.60328	7.87884	10.0447	10.1203	10.1747	10.4133	9.07811	9.78929	5.9582	5.63713	6.73712	6.16852	6.49282	6.84873	7.11956	6.55045	5.95049	6.68184	6.75232	6.7679	5.78718	6.17782	7.54256	6.45976	7.34424	6.97438	5.74198	6.51624	7.1886	7.1281	7.54716	6.88186	6.88834	6.09829	6.60783	6.32017	2.42347	6.05823	7.11613	7.76344	6.51532	7.10531	6.97764	7.1033	6.73266	7.88839	5.95927
PYCR1	6.09809	6.20293	7.01393	6.48245	5.7787	5.98272	6.10234	6.3209	7.24794	5.98019	9.36895	7.60589	7.98836	9.13079	7.36681	7.84926	9.16752	7.82676	7.9787	8.63289	8.0997	8.31101	7.87049	9.6925	8.21738	8.40923	8.15702	8.47795	8.32195	8.38304	8.37542	8.08851	7.50858	8.05126	7.9153	9.0811	8.36122	8.57902	5.94273	8.47791	8.82654	8.74229	8.32164	8.17773	8.04548	7.9185	8.34877	7.84408	7.96208
DLGAP2	8.06791	8.41441	8.14745	8.19795	6.48711	6.39476	6.72534	6.83027	6.46419	6.17292	4.82579	5.10081	5.62858	4.9162	5.21773	5.07226	4.94464	5.27966	5.01458	5.10438	5.02953	4.90921	5.30344	5.05684	4.92578	4.91585	5.06323	5.21159	5.01464	5.16313	5.75598	6.56015	5.50617	4.85165	5.33648	5.04296	5.05833	4.89639	2.71842	5.03692	4.95492	4.86942	4.9134	5.59774	5.28842	6.29965	4.85308	5.51123	4.68214
SCGB2A1	5.21526	5.39923	8.41987	5.25764	4.88109	7.64516	3.91825	5.14255	5.5035	6.9108	10.5295	9.6454	8.29206	13.1215	8.29676	11.1634	8.72848	9.09952	8.27262	8.67442	9.43983	9.8331	10.6102	9.27513	13.3922	8.13439	8.50795	9.5295	13.124	12.0055	9.94146	10.7778	9.94999	9.07176	12.014	11.448	8.0483	11.0036	12.2849	10.6603	7.84729	13.1448	11.0483	9.44151	9.21991	9.6532	9.41758	9.55083	11.3254
NDNF	7.84193	8.74177	8.19557	8.30166	7.87029	9.45653	6.90936	8.13345	8.87229	8.78301	6.02448	7.63902	7.33483	5.94326	7.12388	7.43628	6.68964	6.96466	7.10917	6.74645	6.63507	6.87709	6.54716	6.64281	6.98147	6.32694	7.77234	7.2613	6.14465	7.09197	7.60568	7.63765	7.24223	6.71928	7.4592	7.07281	7.06724	6.53229	5.4094	7.21163	7.10563	6.7229	7.47048	7.80011	7.50586	7.5534	6.47212	7.19998	6.95278
LINC01226	7.9317	7.79905	7.6614	7.70371	8.08656	8.12564	8.28888	8.04104	8.33033	8.13269	6.23898	6.17402	6.00409	6.54624	6.46748	5.92342	6.47889	6.55643	6.22173	6.67965	6.43974	6.32987	6.07731	6.41094	6.36361	6.12705	6.03895	6.22114	6.75922	6.4511	6.31197	6.278	6.29186	6.76388	6.34617	6.41661	6.36562	6.66742	4.57734	6.52993	7.14225	6.57898	6.36261	5.97222	6.03703	5.85678	6.13543	6.03191	6.38477
DSG4	7.26338	6.66926	6.71358	6.84951	5.39933	4.97257	6.01456	5.88072	5.58025	6.20102	4.04881	3.50665	4.00607	3.50195	4.41208	4.37261	3.22944	3.87082	3.9993	4.32997	3.96924	3.91665	4.21952	3.71658	4.31097	4.06829	3.80972	3.51227	4.07055	3.82878	3.78608	4.76624	4.52257	3.80426	3.34541	4.5727	5.07801	2.5815	4.62146	4.23275	3.15454	4.01205	3.68389	3.30262	3.94058	4.27693	4.54042	3.47264	3.80228
ANTXR2	7.71994	7.75006	7.33622	7.21733	8.0144	8.29696	8.1385	7.98465	7.8905	8.33357	5.6186	6.02664	5.91539	6.3257	5.78502	6.46264	6.68578	5.84335	5.76261	6.51043	5.70762	5.84234	5.75395	5.96633	7.15839	5.66087	6.21107	6.23415	5.64261	5.91246	6.32632	6.39717	6.41866	5.42998	6.29354	5.98626	5.65624	6.09384	4.57954	5.65381	6.45264	7.76428	6.30948	6.33296	6.05895	6.74866	6.77859	7.58666	6.11072
ZBTB8B	7.9218	7.82735	7.68263	7.71459	7.8368	7.51327	8.05214	7.71328	8.17833	8.07941	5.74343	5.71418	5.80561	6.16975	5.79882	5.63518	5.7972	6.15828	6.08805	5.94928	6.05005	5.76364	5.65609	5.72463	5.67306	6.35465	5.76293	5.95982	5.72314	5.73542	5.27788	5.57296	5.96092	5.41751	5.8504	5.67401	5.85218	5.88621	4.65764	5.77317	5.72355	5.58618	5.31031	5.84431	5.58917	5.29699	5.47549	5.49997	5.74584
NAP1L2	8.00675	8.54686	7.6671	8.06033	8.72152	9.65756	8.88029	8.62228	8.73668	8.76909	6.03317	5.74742	5.11262	6.78378	7.10649	7.00031	6.35709	6.30842	5.34825	5.73776	6.87748	6.20908	6.78316	6.83301	6.83847	7.21425	7.97833	5.69422	8.15846	5.46261	6.93696	5.66845	6.13598	7.89955	5.94019	5.27921	4.55177	7.68083	3.78225	5.14325	6.04304	7.11978	6.16011	4.96943	5.29368	5.90907	4.97055	6.18219	5.68951
ATP10D	8.11025	8.46321	7.90911	8.42518	9.2245	9.53645	9.19728	9.59161	9.03017	9.22535	6.98641	6.00158	6.2962	6.85718	5.84386	6.87507	6.93412	5.80484	5.21275	6.2032	6.59747	5.73183	6.53027	7.14623	7.80039	5.64277	6.44337	6.13903	6.24803	6.44029	6.22707	6.1641	6.28799	5.85797	6.70069	6.30826	6.89986	7.04521	4.57327	6.05633	6.55887	7.289	7.0647	6.56404	6.55216	7.09639	7.08604	7.60298	7.34476
FOXQ1	7.60766	7.77515	8.71051	7.91203	7.49967	8.13586	7.25998	7.24753	7.33881	7.57826	11.4168	8.8772	9.82835	11.4227	10.6066	10.7638	12.0548	9.4644	8.86666	12.3073	9.22026	10.9956	10.7404	9.91953	11.4184	8.7788	10.7736	9.72325	10.1563	10.282	10.7895	10.8102	9.41445	9.5032	10.0278	11.8533	10.9453	11.532	10.2976	10.3827	8.10058	10.6428	9.40808	8.48835	9.42893	9.25393	10.7673	10.048	8.44977
PCDH17	7.02733	7.71486	8.90545	9.11565	7.99942	9.27011	8.02678	9.55586	10.1348	10.8321	6.28388	6.19673	6.47296	6.22154	6.53718	6.40746	6.87546	6.43517	6.67284	6.27913	5.88662	6.6191	5.68609	8.67352	7.827	6.04689	6.09099	7.01293	6.07479	6.43475	6.2096	6.30086	6.18887	5.84981	7.50703	5.93057	7.25073	6.01084	5.58834	7.90067	6.46807	6.7087	6.03939	6.83967	7.75195	6.38175	7.2414	6.68317	7.54446
OLFM2	8.54996	8.78147	8.60758	8.6016	7.93321	7.79772	7.88122	7.80832	7.6973	8.02395	6.10071	6.09427	6.43932	5.94816	5.80609	6.19115	6.13599	5.76374	6.77523	6.169	5.96835	6.05202	6.118	6.48696	5.93868	6.15281	5.89769	6.43113	6.05621	6.27652	6.11474	6.09117	6.10407	5.83286	6.19023	6.12707	6.10009	6.75821	3.82465	6.20842	7.01213	6.19497	6.39515	6.44113	6.40313	6.7125	5.7474	6.12204	5.70129
ANKHD1	8.05061	7.68527	7.4972	7.6014	8.02532	8.47179	8.73952	8.43947	9.1577	8.60772	5.60938	5.25771	4.7672	5.24844	5.45787	4.90862	5.40531	5.46553	5.11384	5.42892	4.83579	5.00918	5.02727	3.76966	4.91965	4.51613	5.1506	5.10543	5.02654	5.30198	5.23223	3.50235	4.09147	6.1842	5.33977	4.07565	5.2949	4.64937	7.26856	5.64826	4.59394	5.71549	4.44677	3.72317	4.39975	4.58059	5.00068	5.05782	4.8966
RNF187	7.18683	7.62662	7.39032	7.11956	7.70059	7.87924	7.67112	7.73514	8.20699	8.2127	9.66147	9.29187	8.93344	8.80464	9.39255	9.29932	9.21736	9.3833	9.03122	9.65468	9.28626	9.2898	9.41923	9.48762	9.26463	9.68762	9.0354	9.02938	9.57629	9.38987	8.98682	9.3596	9.19115	9.28239	9.09627	9.86337	9.62486	10.0087	8.22187	9.05427	9.47741	9.06968	9.29449	9.09783	9.20997	9.20541	9.48317	9.4488	9.44554
SLC39A4	7.91077	7.79618	8.44108	8.09732	6.77364	6.69886	6.65274	6.83961	6.93923	6.89617	9.84032	8.74465	9.43531	9.77334	9.38572	8.93181	9.39058	9.82887	8.27915	7.56054	8.58318	9.32896	8.45362	10.3287	8.85214	8.09439	9.5081	9.19374	8.01047	9.66757	9.02542	9.1288	9.81961	9.62628	8.90251	9.3311	9.16677	9.36411	7.11835	8.66851	8.07836	10.7433	8.85345	8.42231	8.61954	9.03668	8.98602	9.19395	9.03294
NUB1	8.21769	8.88136	8.25232	8.21335	8.10755	8.04773	7.69402	8.06962	8.24473	7.93037	9.62538	9.58737	9.47627	8.40815	9.86322	9.64128	10.1879	9.40283	9.67974	9.67656	9.6462	9.5789	9.62882	9.57136	9.59095	9.77573	9.62911	9.47977	9.69195	9.61745	9.79995	9.74824	9.64065	9.71669	9.7378	9.7342	9.58621	9.51712	7.06912	9.85201	9.68825	9.03594	9.7155	9.79374	9.61005	9.77656	9.57999	9.8384	9.83623
FAM19A4	7.18415	7.23443	6.72684	7.03287	5.56648	5.52956	5.27907	5.48787	5.53921	5.83937	4.32074	3.92969	4.00194	4.23737	4.35993	3.59687	3.82766	4.53416	4.40179	2.96444	4.67175	3.97586	4.11019	2.97913	3.94594	3.63707	3.754	4.37044	4.09822	3.68046	3.3697	4.03915	4.99294	3.57234	2.98885	3.57133	4.09942	4.20219	4.01871	3.88081	3.70244	3.75621	3.93276	4.37926	3.97846	3.64894	4.26271	3.99535	3.8536
TSPAN5	7.94695	8.32459	7.79251	7.94397	8.00333	8.44661	8.25193	8.10477	8.24537	8.70817	7.1338	7.17443	7.32107	7.03669	7.40537	7.35194	6.67126	7.3896	7.38933	6.5898	6.93094	7.39918	7.12917	6.61733	7.58921	6.96742	7.55682	7.37369	6.82697	7.32348	7.44356	7.20146	7.36228	7.39349	7.31944	6.55613	7.04294	6.5347	5.48794	6.94851	7.23863	7.94492	7.15492	7.58494	7.6396	7.89619	7.30052	7.82294	7.89639
PID1	5.82398	7.31863	6.695	6.10458	6.94002	7.66014	7.03206	5.72365	6.10359	7.84015	5.02246	5.11698	5.05022	5.1641	5.26858	4.99863	5.50169	5.18916	4.85267	5.28583	5.22899	5.34042	4.92693	5.03785	5.59699	5.33273	4.70363	4.98683	5.13078	5.0768	4.80135	5.30543	4.96234	5.13666	5.06346	5.13656	5.01088	4.99166	6.82824	5.01742	5.1065	6.52085	5.4592	4.89195	5.037	5.39384	5.15984	5.471	5.21115
RNF128	8.60476	8.5242	7.51912	8.3713	8.5588	9.55118	8.4673	8.71519	9.29777	8.60411	2.8853	3.72586	3.82318	3.54816	3.85943	2.51091	7.77638	4.88616	4.39939	4.26945	5.03515	2.43244	4.3154	3.94892	6.32103	4.57186	5.09913	4.0542	3.33805	5.49092	3.65443	4.5088	5.98468	3.65849	4.38769	4.07829	5.23026	3.62331	1.02097	3.28339	3.29363	3.92015	3.22225	5.77723	7.32015	5.67925	5.11695	5.52295	7.85496
GHR	7.46843	8.05029	8.17251	8.23436	9.91776	10.1765	10.0453	10.0326	9.20322	9.80162	4.38546	5.20006	5.07088	5.40716	4.12079	4.45335	5.55824	5.23378	4.43271	4.98059	5.0802	5.18542	6.40471	4.25146	6.63201	6.21084	5.40641	5.30389	6.0873	4.69507	5.1246	5.73066	6.26236	8.56111	4.83579	3.98527	4.20868	4.4554	3.06408	3.68404	3.92247	7.38489	6.34585	4.64895	4.25434	5.86871	5.31655	7.2342	4.35783
C8orf49	4.95107	5.61802	4.32579	5.18089	4.05976	4.90643	4.16741	4.81535	6.34013	5.99684	2.83868	2.46105	3.10966	3.77418	2.9452	3.28261	2.92153	3.22408	2.15776	2.53718	3.2755	3.52388	3.02685	3.15286	1.94621	3.45232	2.75617	2.71697	2.4777	3.4355	3.47917	2.70589	4.15531	3.28373	0.6521	3.18534	2.71363	2.67903	2.71789	3.10481	3.14791	4.31788	2.85475	3.10853	3.43531	3.39681	3.11352	2.9308	3.42897
PRKCQ-AS1	5.0351	5.21381	5.73625	5.43126	4.96166	5.22608	5.04577	4.66222	4.57945	4.75777	8.13838	8.07899	8.31856	7.57347	8.31713	8.15627	7.83575	8.28239	8.51386	7.39711	8.10164	8.26151	7.88049	7.70478	8.11239	7.84948	8.3033	8.15347	8.09742	8.20366	8.31908	7.88057	8.29791	8.32786	8.17108	7.76702	7.70035	7.61617	4.19492	8.15268	7.60677	6.85847	7.98352	8.12417	8.04107	7.68805	7.85513	8.23894	7.99337
FITM1	8.86451	9.13402	9.77488	9.27294	8.764	8.48516	8.60887	8.40387	8.16934	8.53731	6.31451	5.87347	6.44486	6.43149	6.09146	6.45156	6.23269	6.21346	5.82251	6.14332	6.31595	5.82788	6.45771	5.94243	6.12266	6.34615	6.12498	5.93215	6.00185	6.25239	6.19371	6.09911	7.37491	6.41527	6.39013	6.1705	6.18764	6.26193	4.75405	6.36334	6.41917	6.10115	6.29943	6.43927	6.35299	6.08807	6.45196	6.51631	6.31345
PLCL1	5.85469	5.59456	5.02689	6.11419	6.11474	7.03591	7.10395	7.1953	5.84128	6.19693	4.81958	6.26813	5.74173	5.38109	4.94118	5.51785	4.42773	5.03196	5.05182	5.11921	5.44605	4.79882	4.53093	4.4656	5.20094	4.87747	5.23603	5.1784	5.14575	4.1954	4.61774	5.07766	4.3953	4.41375	5.69067	5.38616	4.11257	4.21155	4.23684	4.35876	4.96053	4.95334	5.04872	4.93286	5.63181	5.13305	4.66023	4.90207	4.52251
RNASE4	8.5111	9.49664	8.45277	8.70198	10.0807	10.1266	10.2783	9.90447	9.06078	9.93554	5.57991	6.61629	6.51	7.54251	6.59549	7.40222	7.26417	5.96498	4.73986	6.87554	8.17778	6.40334	7.39927	5.91225	7.15269	6.1791	6.97117	6.91899	5.74077	5.87961	6.77598	6.88323	7.05293	7.52772	6.10614	6.80302	5.5565	6.58258	4.60494	5.60149	6.19595	7.65513	7.99692	6.60096	7.34093	7.65189	6.92071	7.6398	7.6237
NR2F6	7.49539	8.0414	8.28775	7.95306	8.09301	8.38359	7.96938	7.91979	8.1119	8.37342	9.64521	9.29707	9.19037	10.2194	10.467	9.42688	9.77748	10.1115	9.38026	10.6332	10.3961	10.2433	8.6506	10.5514	9.52568	10.1623	8.47638	9.71615	10.2978	10.2965	8.49032	8.75219	9.33864	9.07369	9.50179	10.6039	10.5977	10.5131	8.75969	10.1646	8.87623	10.5838	8.86266	8.25048	9.30178	8.39322	9.01218	8.5391	9.26812
EHF	7.50416	7.55967	8.20618	7.61919	6.21566	7.87457	6.07485	5.85508	6.41145	6.28167	9.76568	9.9081	8.34571	10.4704	8.43	8.96454	10.2745	8.85957	8.7674	11.022	8.70015	9.47672	8.78817	8.18603	9.0237	9.30195	8.24841	8.78536	9.79104	8.7976	8.68862	8.29808	8.85111	7.95156	8.72244	9.61354	7.3174	10.5875	9.59613	9.56596	8.92606	10.0668	8.33968	8.27712	8.61505	8.14905	8.78974	8.58003	8.60671
LOC285766	7.26016	7.40659	6.88615	6.86336	7.08344	7.15406	7.32909	6.9735	6.72855	7.35963	5.61128	5.46133	5.35227	6.14209	5.70807	5.34601	5.1864	5.72304	5.86777	5.32321	5.21847	5.65716	5.00362	5.37217	5.45119	5.1741	5.4776	5.60894	5.29445	5.20931	5.80376	4.93267	5.02703	5.47994	5.33738	5.09306	5.08348	5.09516	3.89157	5.21372	4.98789	5.48428	5.07582	5.62496	5.55381	5.71783	5.36915	5.5403	5.1848
MAOA	7.63048	7.47993	7.47294	8.45037	8.12973	8.45801	8.19509	8.53079	8.40909	8.14482	6.29909	6.95265	6.69629	6.901	6.95845	6.33524	6.22167	6.15983	6.17711	6.31613	6.75604	6.41019	6.18044	6.31458	6.65645	6.55264	6.51435	6.54268	6.514	6.3642	6.54046	6.42328	6.69683	6.35088	6.42691	6.25296	6.54447	7.09322	4.18306	6.43801	6.01435	7.16629	6.37877	6.7198	7.31217	7.05858	6.43385	6.54863	7.36894
FOLR1	7.70094	7.68509	7.91933	8.21607	6.31579	7.39836	5.77829	5.5071	5.75607	6.54559	10.0939	10.9162	9.78474	11.0243	11.5689	9.06878	11.7552	11.4636	10.634	10.4576	11.9876	9.03311	9.49219	10.7966	11.1601	11.1255	9.69967	11.2106	10.7755	11.6557	10.1827	9.98082	10.1851	10.5868	10.1634	8.62629	9.86662	13.1255	10.7203	11.3581	9.46398	12.4026	9.71546	10.0253	8.63643	9.19741	10.3141	10.2142	8.48488
YEATS2	7.89351	8.20636	7.78631	7.67165	7.20233	7.3504	7.34965	7.17861	7.40295	7.2327	10.3655	10.5215	10.4213	9.78114	10.3074	10.426	10.3371	10.3785	10.6653	10.7262	10.3323	10.457	10.1416	10.2767	10.2956	10.5461	10.5668	10.406	10.225	10.2873	10.4467	10.3717	10.4762	10.399	10.3174	10.0618	10.3012	10.5577	5.64205	10.0354	9.97511	9.69451	10.2489	10.0739	10.3141	9.94125	10.2708	10.2484	10.1063
BDKRB1	6.59041	7.5032	6.60439	6.74147	7.32221	7.85631	6.82783	7.45131	7.91325	5.97495	5.63121	5.9386	6.01639	6.0441	5.97088	5.84468	5.57016	5.95053	5.77816	5.61693	5.97908	5.75796	5.8372	5.62073	6.00206	5.42656	5.7721	5.90883	5.34442	5.61413	5.58143	6.67009	5.99585	5.45226	5.4595	5.26892	5.30968	5.59735	4.1175	5.64542	5.8655	7.32315	5.73979	6.25371	6.39315	6.02187	6.21724	5.69943	5.38404
SNORA37	7.9126	7.75684	7.93741	7.94967	8.90937	8.80056	8.79457	8.41262	8.62782	8.64255	5.34628	5.20426	5.03533	5.35826	5.10756	5.11015	5.25531	5.12791	5.25481	5.47007	5.38045	5.26935	5.45111	5.24782	5.13004	5.56615	5.09822	4.9889	5.33198	5.13067	5.10496	5.55646	4.98996	5.00979	5.29707	5.34858	5.4051	5.46576	8.65429	4.99135	5.61168	5.56669	5.14854	5.36225	5.56334	6.01678	5.41464	5.05436	5.29538
ID3	6.97097	7.46789	8.07397	8.08134	9.14769	8.97397	9.5908	9.11452	8.48215	9.52471	5.09302	6.59457	5.54688	5.39618	5.44467	6.33279	6.26836	5.28224	4.74311	5.44227	5.55754	5.07593	5.00319	4.95834	6.86154	4.59312	5.41934	5.84595	4.72544	5.2549	5.44559	5.93054	5.73232	5.57422	5.55852	5.19658	5.02464	4.83843	4.07841	5.2506	6.01705	6.56839	5.53018	6.46972	6.14162	7.03581	6.2123	7.03935	5.4306
GAL3ST2	10.1421	10.311	10.2602	10.1917	9.42501	9.33606	9.18515	9.12195	9.51286	9.43174	7.105	6.9131	7.67853	6.78918	7.3118	7.07821	7.45027	7.14706	7.29603	7.43874	7.03255	7.8092	7.71963	7.61359	7.25003	7.60314	7.92813	6.83376	7.17255	7.97847	7.07094	7.77415	8.44339	7.55865	7.32299	7.55336	7.461	7.18892	5.58933	7.3718	8.35353	7.51483	7.48303	7.51403	7.52273	7.67528	7.31307	7.25868	7.53353
FOXP1-IT1	6.95985	6.91801	7.64273	7.18917	9.30571	9.42673	9.27837	8.75528	8.65	8.71124	4.79908	4.42607	4.46275	5.09539	4.8813	4.2649	4.63649	5.37583	4.81466	4.30882	4.82655	4.86377	4.51788	4.34859	4.707	4.58047	4.6566	5.01009	4.56765	4.72442	4.66434	4.49213	4.73721	4.97582	4.4384	4.75557	4.19684	4.5878	6.96209	4.95101	5.11859	4.81815	5.1326	4.99046	5.03773	5.18852	4.9954	5.90735	5.2543
CNRIP1	8.63579	9.12026	8.34586	8.23151	9.45366	9.42843	9.47668	8.77273	8.52084	9.1578	6.69477	7.55239	7.83769	7.09801	7.20301	7.99343	7.36741	7.43584	7.58702	6.75641	7.41228	7.18035	7.57163	7.00772	8.07999	7.05691	8.03738	8.03428	6.64016	7.52734	8.33605	8.06523	7.74539	7.31069	7.87168	7.54318	7.4251	7.4813	4.83333	7.10141	8.05939	8.2173	7.9075	8.25522	8.26295	8.71081	7.74761	8.35646	8.0878
PLA2G2A	8.27083	8.00289	8.47897	8.23669	9.85441	8.57461	8.89956	10.3273	8.15494	8.64378	7.22969	6.94644	6.9301	7.08703	7.12922	6.75444	6.93371	7.5659	6.99773	7.253	6.9609	6.89603	7.08752	6.86982	6.89255	6.65548	6.8466	7.05945	6.83389	6.80374	6.75437	6.68856	7.01801	6.834	6.99057	6.82069	7.26231	6.86914	2.26371	6.91552	7.49486	7.32443	7.09443	7.2651	7.34511	7.12908	7.18593	6.7008	7.01783
PPP1R12B	6.50541	6.69737	6.53827	7.07512	7.51666	7.57023	7.69889	7.31561	7.54994	7.29245	5.93047	5.87016	5.98585	5.90015	5.88261	6.07352	6.3746	5.86772	5.90354	6.0675	5.85342	6.02973	5.82668	5.95904	6.42873	6.00971	5.90886	6.23353	5.77574	6.03417	6.10571	6.16314	5.98784	5.99083	6.0257	6.03943	6.14171	5.87253	3.91418	6.03919	6.22796	6.54633	5.92435	6.08663	6.05623	6.53147	6.27858	6.35274	5.97276
ZNF577	9.33268	10.4398	9.86944	9.52546	7.42736	6.68086	6.94126	7.9497	7.03875	7.51477	5.17037	4.95357	5.20555	5.15051	5.07265	5.0713	5.06104	5.21011	5.16195	5.20969	5.17437	5.18514	5.1811	4.94273	5.09785	5.14892	5.1037	5.33025	5.05083	4.99614	5.20914	5.04662	4.98548	4.9258	5.15194	4.88859	5.19623	5.07707	6.53077	4.94656	4.80017	5.02931	4.98599	5.26348	5.00325	5.23454	4.87566	4.93776	4.93574
GATA5	6.40229	7.44374	5.7689	6.29635	7.22564	8.08496	7.17472	7.81107	7.50176	7.29804	4.70789	4.74006	5.60373	4.93135	4.6298	5.08729	4.82402	5.20371	4.89881	4.76322	5.16635	6.55602	5.50571	4.88947	5.04555	4.75884	4.99807	5.55167	5.89464	4.94806	5.70997	5.42019	5.59805	4.98802	5.17422	4.72492	4.88074	4.41594	3.69617	5.33276	5.62143	5.31382	5.52365	6.0294	5.67933	6.41556	5.04492	5.96122	5.87392
PFKP	7.7182	7.51432	7.68441	7.47133	7.99889	8.05013	7.81497	7.68262	8.65643	8.15873	11.1026	9.46902	9.24223	10.0807	9.96897	9.50324	10.3023	9.85271	9.13167	10.1904	10.0858	9.47051	9.8243	10.1269	8.74871	9.54515	9.61298	9.23933	10.3691	9.72296	7.80028	8.77375	9.08351	9.0513	9.92985	10.3824	8.61348	9.80529	9.28031	8.52369	8.65657	9.22194	9.66526	8.60847	8.28015	8.48005	9.51283	9.06274	8.92135
RNF157-AS1	5.65151	5.46441	6.18892	5.9714	5.64039	5.74557	5.09417	5.10942	5.25582	5.5334	9.13745	6.64149	7.12443	8.40996	6.39498	8.08596	8.52105	6.33193	7.84397	6.83544	7.6203	8.33964	7.43366	8.49604	7.32904	8.17423	8.5564	6.60663	8.34656	7.44411	7.63908	8.00966	7.09815	7.62928	7.9195	9.09753	8.13821	8.4265	6.44998	7.02543	8.2599	7.69683	7.40813	5.67704	6.7056	7.84342	8.07805	5.88333	8.28046
CPA1	6.84576	8.02627	7.52629	8.32279	6.89359	6.19819	6.6899	6.50215	6.27495	6.51685	3.99228	4.53238	3.33407	4.00629	3.95826	3.30897	4.09231	4.44747	4.37798	4.43655	4.77549	4.25275	4.23013	4.05186	4.1467	4.54781	4.22409	3.54527	4.48784	3.63321	3.59652	4.53346	3.73941	4.43397	3.80014	3.9857	4.18519	4.40828	5.31166	4.11764	4.37419	4.35208	3.94428	3.55492	4.1471	3.89258	3.63383	3.44371	3.3943
INTS5	7.45664	7.50567	7.77426	7.21785	7.26604	7.38043	7.45762	7.32692	7.38847	7.52341	8.88553	8.57413	8.45191	8.53547	8.76072	8.69997	8.68399	9.10003	8.27191	8.826	8.65994	8.56854	8.73409	8.77587	8.67621	8.72718	8.4552	8.519	8.88128	8.59745	8.20204	8.41484	8.3808	8.67149	8.6334	9.09731	8.74032	8.54625	6.54663	8.67392	9.15495	8.29149	8.73525	8.46716	8.61499	8.63271	8.98067	8.66814	8.72918
ASB13	8.093	8.27769	8.28006	8.24824	7.30617	6.81282	7.38376	6.64263	6.53132	7.165	10.6917	10.739	10.3866	10.0046	10.8248	10.5611	10.7809	10.7194	10.33	10.6242	10.6325	10.4585	10.6979	10.6579	10.599	10.9085	10.3522	10.5277	10.7682	10.8909	10.5711	10.8251	10.6176	10.8181	10.7249	10.813	10.8759	10.6778	6.65472	10.87	10.8603	9.87891	10.9419	10.8576	10.8831	10.7399	10.8747	11.004	10.853
DPP10	8.04705	8.16184	7.45297	8.28932	8.25686	9.1089	8.56902	8.69835	9.51809	8.76943	3.13513	3.59605	3.29113	3.27856	3.43934	3.6038	3.22191	3.22524	2.67098	3.82161	3.0635	3.71375	3.63254	2.88067	3.37379	9.99306	5.45913	3.36238	3.87977	3.30384	3.87482	4.96996	4.47293	4.57625	3.60692	2.85022	6.53102	3.31404	2.27348	3.38698	3.3319	5.8769	3.29982	2.76433	3.81358	5.24661	4.51752	5.85328	2.79379
GPD1	6.17737	6.01172	7.35439	6.82968	8.82099	8.39725	9.05196	8.08563	6.25669	8.52979	6.34725	5.98217	6.10349	6.32976	6.33684	6.26813	6.08286	6.22506	6.33772	6.27185	6.10913	6.27852	5.93657	6.13547	6.40471	6.01728	6.23701	6.41093	5.92298	6.07275	6.22298	6.18044	6.2865	5.95609	6.19483	5.93123	6.25264	5.94943	3.16562	6.07474	6.26149	6.65038	6.10904	6.22699	6.15252	6.27722	6.26569	6.29676	6.11906
GPM6A	7.51272	9.27186	8.05083	8.08476	9.96382	10.0013	9.79293	8.39586	8.51623	10.0228	6.39299	5.54251	5.61495	7.95639	5.47743	5.53992	5.42488	5.39468	5.46226	5.31671	6.84001	5.58126	6.38943	5.23121	5.6022	6.27929	5.49933	5.55234	5.6005	5.23537	5.69771	5.60302	6.07328	9.27605	5.71004	5.78502	5.4542	5.26003	3.48814	5.22432	5.5838	9.21495	7.58648	5.85695	7.49393	6.78384	7.01079	5.84033	5.86953
PSAT1	7.88955	7.97382	7.93694	7.35237	6.77152	7.76643	6.89518	6.5439	6.45276	6.91181	8.61654	10.1251	9.20701	9.75824	9.69593	8.60353	9.8075	10.3619	10.0201	12.2706	10.8339	9.43816	9.87501	11.4932	11.0339	10.9183	9.54608	9.98038	9.57033	9.23081	8.85508	8.79178	9.49023	9.31737	10.1263	9.84551	10.6104	11.1653	7.24931	9.82581	8.13697	10.3241	9.45947	9.55334	9.32619	8.17959	8.82786	8.98265	9.34621
LRP2	7.68603	7.28241	7.71823	7.529	9.41345	9.09969	9.75441	9.64927	8.71948	9.46144	5.85027	6.03727	5.45879	6.4303	5.8117	5.55096	5.70545	5.53878	5.54381	5.65144	8.21441	5.59849	4.97721	5.91673	5.42674	5.73705	5.76298	5.84423	5.33815	5.76777	6.14821	6.51113	8.12116	5.70946	7.47831	5.41099	6.56781	8.50578	5.19238	5.6188	7.9225	9.26043	6.61317	5.95415	7.63205	5.82108	5.5067	5.34935	8.02516
ABCA5	6.88037	6.25062	6.64139	7.27229	8.40953	8.77405	8.59713	8.48955	8.04785	8.4485	5.12659	5.18996	4.44634	5.5843	4.97443	5.18108	5.20574	5.02451	4.98769	4.48275	4.69494	4.87033	4.87027	5.25469	5.37963	5.15905	5.41633	4.80857	5.17327	5.01491	5.09638	5.34796	4.5751	5.12427	4.86368	6.13628	4.41137	5.14166	4.37887	4.84842	5.50806	5.83248	5.76451	5.97394	5.22098	5.03733	4.9837	5.33786	5.92757
LOC100506834	7.5069	7.64875	7.52568	8.34631	8.41348	8.8	9.70755	8.97835	8.53477	8.55251	7.02027	5.76795	6.88437	6.47561	6.51184	6.43216	6.34898	6.16394	6.27673	6.07475	6.38062	6.19026	6.1977	7.01622	6.013	5.59713	6.0071	6.64155	6.65139	6.04101	6.61966	6.35471	6.34811	6.94192	6.69755	8.71542	5.73463	5.5335	4.75066	6.06946	6.17317	6.12788	5.94327	6.54884	6.21486	6.92118	7.17053	7.03338	5.92717
SLC25A21	4.75432	4.74729	4.23258	4.44501	4.78299	5.2157	5.73945	4.5365	5.1136	5.99615	4.45334	3.63456	3.74227	3.89348	3.97437	3.90832	3.56399	3.30468	3.30253	3.70595	3.72766	4.0247	3.66485	3.57461	3.89592	3.13267	3.69616	3.543	3.54422	3.44689	3.88647	3.78979	4.46872	3.53866	3.62141	3.38725	3.15419	3.46601	2.16008	3.95813	3.54114	2.81688	2.87149	3.92535	4.54459	4.38475	3.51048	3.92765	3.20669
XAGE3	6.60446	7.57617	6.88165	6.84456	8.57932	7.64508	8.62975	7.95075	7.71819	7.83019	5.92552	5.78551	5.48058	5.91147	5.66004	5.60855	5.82303	6.11284	5.93783	5.70377	5.77664	5.70127	5.44586	5.7521	5.63801	5.53123	5.60888	5.48531	5.7183	5.62235	5.2867	5.38234	5.44825	5.58553	5.78605	5.45098	5.75166	6.09527	4.60285	5.44768	5.79479	5.79472	5.42045	5.51971	6.36709	5.67584	5.44351	5.34943	5.56685
LOC100130691	6.88887	7.07665	7.8334	7.04474	6.65447	5.81812	6.35577	6.21534	6.47403	6.24727	5.10997	5.39193	4.53035	5.69641	5.10498	5.10711	5.47488	4.94154	4.85888	4.92253	4.4519	4.85032	5.42647	4.72116	5.40153	5.04755	4.94095	5.56318	4.47267	4.8113	5.48569	4.93587	5.3976	4.81559	5.51864	5.2154	4.5115	4.93129	4.87184	4.54731	5.32187	5.0044	4.89685	4.50196	5.42711	5.34065	5.29374	4.54374	5.05557
LOC101928135	7.014	7.66811	7.86017	8.06167	5.95106	5.90137	6.24847	6.13806	5.81033	6.21805	4.33518	5.20058	5.24638	4.51285	4.7607	4.67164	4.91464	4.99482	4.99086	4.5772	4.5966	4.9596	4.87829	4.70895	4.79615	5.08325	4.79421	4.59877	4.68177	4.74548	4.62415	5.00696	5.50999	5.05408	4.84771	4.87616	5.12463	5.38807	2.7867	5.02383	5.34209	4.95862	5.0466	5.23393	5.35366	5.61778	5.08819	5.14798	4.85465
DSE	7.88397	7.97398	7.65325	7.91348	9.33843	9.03464	9.44629	9.53882	9.30429	8.58406	6.36916	6.67942	6.25589	6.24473	6.70436	6.99472	6.65229	5.75172	5.85561	6.61371	5.96768	5.71758	5.75957	6.04939	7.25219	5.64424	6.44995	6.54096	5.71603	5.62645	6.49255	6.21737	6.72423	5.53615	6.21902	6.41514	5.60718	6.69137	4.97454	6.20834	6.97594	7.53388	6.16552	6.23116	6.88182	7.12002	6.46428	7.57584	6.59032
SMARCD2	9.35854	9.79753	8.94476	9.05738	7.97761	7.41272	7.47878	8.30828	8.08534	7.98362	10.6752	9.87998	9.17837	10.074	9.82223	9.68686	9.8022	10.1169	9.84295	10.4438	9.41633	10.0903	9.63134	9.64759	9.79101	9.63671	9.6566	10.2562	9.95821	9.34907	9.42033	9.22512	9.21185	9.42401	9.46131	10.0322	9.54347	9.06704	8.03084	8.93764	8.95926	9.17541	9.73158	9.34795	9.53156	9.7399	9.86075	9.49723	9.65327
MARCO	11.2104	7.5039	7.73056	6.52895	11.2313	9.17662	10.5811	8.87445	10.4025	8.87321	5.95707	6.20874	6.22747	5.88186	6.22289	5.83829	6.52125	6.95799	5.75569	5.91798	5.90491	5.7357	5.78846	7.12162	6.16362	6.02405	5.90991	6.0724	5.74831	6.08753	5.53901	7.17596	6.18443	5.44263	5.96533	5.98454	7.30364	9.0807	4.90782	6.00992	5.79833	5.70545	6.07921	5.61068	5.85371	6.13767	6.26806	6.49505	5.69445
RP1-142L7.8	6.80716	6.36493	7.84976	8.53951	9.86982	8.61572	9.92993	9.37395	7.84061	7.16013	6.09337	5.22394	6.86738	5.83472	6.12988	6.57238	6.13077	6.19364	5.87626	5.55	5.21797	5.53162	4.96263	4.58842	7.51503	4.73352	6.53186	7.3811	5.35204	5.63293	5.8785	6.3886	5.76511	5.21795	6.06453	6.3943	6.07646	5.42638	4.27378	5.1756	6.02976	5.41382	5.05897	5.7423	5.12035	5.80394	6.96145	6.8359	5.06575
PKP3	7.18658	7.28026	8.20415	7.7609	6.35351	6.93809	7.16313	6.38296	6.58386	7.25232	9.95121	8.87535	8.11686	8.63463	7.70469	8.61685	8.5554	8.43865	8.71868	9.14796	7.37619	8.35208	8.54336	8.62202	8.71947	8.0836	8.25868	8.10309	8.8254	8.52566	8.17315	8.27701	8.11321	7.96306	8.79302	8.51426	7.49463	8.69847	8.45054	8.54363	8.62173	9.08502	8.66142	8.00126	8.20947	8.12632	8.71681	8.10977	7.51346
EFEMP1	9.52697	10.3992	9.12031	9.42174	11.772	11.6063	11.7345	11.8604	11.0831	10.8779	6.99764	6.41552	8.39374	5.06619	5.60791	6.97689	10.0716	6.39516	6.81387	5.65016	8.70658	5.32235	6.289	6.11875	6.61349	5.37688	6.60586	6.67083	5.2663	8.40062	8.61348	7.29429	7.68865	8.30801	6.69926	6.77795	5.68247	5.86163	4.47105	5.94681	6.53698	5.5008	7.31336	7.26043	6.43655	7.95714	7.17091	8.83371	5.31581
LOC401220	5.36742	5.39545	5.51318	5.49873	5.79528	6.22893	7.43537	6.38589	5.59378	6.94401	4.16152	5.01495	3.91113	4.78644	3.63721	4.18758	4.11715	4.16532	4.04257	3.81266	5.04923	4.01488	4.5502	3.7518	4.09982	3.29805	4.8888	4.21075	5.6125	3.67411	5.1606	4.80825	4.24889	5.00536	5.15301	4.64888	3.93183	4.85401	3.91476	4.66803	5.25996	4.97062	4.4181	4.70421	4.23777	4.69029	3.92926	4.14597	4.17215
SUSD2	6.99296	6.93075	7.0594	6.69232	6.23322	5.89426	6.10942	6.18674	6.25998	6.38111	8.49104	8.7545	8.75412	7.31022	8.92474	8.48582	7.90085	8.68397	8.63067	7.87193	8.3691	9.03819	8.58112	7.62323	8.36821	7.83069	8.56303	8.98949	8.15645	8.44933	8.35468	8.25671	8.51245	8.15284	8.24137	8.25012	8.1135	8.17346	8.63246	8.08612	7.67376	8.91755	8.34723	8.3208	8.55951	8.45157	8.63565	8.38674	8.41354
PANK1	6.67601	6.81418	7.54188	7.12013	5.5366	6.01247	6.12709	6.19046	6.8161	6.43171	8.07632	8.22229	8.5143	8.75459	8.62407	8.84019	8.91729	7.80671	8.86668	9.79773	8.7123	8.3238	7.72953	8.81011	8.5704	9.63262	9.15251	7.76246	8.69666	7.43719	8.22299	8.09131	8.30817	8.58602	7.67688	8.56509	8.93511	7.92234	8.59763	8.41257	7.78495	7.31955	8.37113	7.98493	8.0507	7.91559	7.62804	7.57048	7.88616
ZNF503	8.07696	9.1035	8.65249	8.41637	7.71697	7.5856	7.60314	7.76799	7.39592	7.92589	9.91513	10.0945	10.0432	9.37907	10.1099	10.0848	9.993	10.052	9.95118	9.91347	10.0093	10.1148	9.96555	9.99513	10.0888	9.95379	10.0044	10.12	9.9587	10.0845	10.0742	10.1971	10.0015	10.0765	10.0552	10.1302	10.1066	9.9672	7.57531	10.0625	10.1708	9.10853	9.93272	9.76786	9.98667	9.75048	9.92797	10.0742	9.85868
SLC39A1	5.91025	5.86148	5.65814	5.66777	6.15842	6.00041	6.1031	6.10982	6.18327	6.13584	9.26142	8.39159	8.27671	9.49772	8.3477	8.57472	8.7185	8.46388	8.13548	9.58563	8.23379	8.54616	8.40494	9.06296	8.5226	8.78268	8.08821	8.46545	8.93721	8.34994	7.86239	8.055	8.06606	7.85416	7.91663	9.21201	9.05274	9.45192	4.86098	8.3226	7.75417	9.37937	8.36993	7.7487	8.03466	7.84157	8.2714	8.06264	8.09347
IDNK	10.8875	12.0447	11.1103	10.9228	9.34302	8.87076	8.91683	9.53848	9.06317	9.09294	8.09957	7.65292	8.0529	7.95787	7.2297	8.04671	7.53925	7.06795	7.40599	7.50521	7.8171	7.28474	7.97737	7.67465	7.43669	7.24283	7.30977	7.15632	7.99999	7.00827	7.50661	7.02767	7.04462	6.96799	7.06831	7.09741	6.59637	7.37446	4.31031	7.63278	7.37356	8.06416	7.29524	7.38902	7.71068	7.51068	8.48728	7.38669	7.73289
ANG	7.08169	7.45659	7.21126	7.48725	8.57266	8.40507	8.31996	7.65847	7.46209	8.17668	5.2289	5.6813	6.19202	6.83315	5.87648	6.14803	6.21909	5.41338	5.3748	5.65727	6.19996	5.32338	6.09023	5.43425	5.66759	5.58804	6.04368	6.30338	5.51226	5.51034	5.65236	6.07285	5.85386	6.51469	5.32113	5.90727	5.87967	6.01517	3.68977	5.38314	5.56113	5.95685	6.56976	6.60707	6.60599	5.9456	5.83828	6.28323	6.95781
NELL2	9.84784	9.93553	9.23501	9.61972	10.7431	11.4994	11.0619	10.9417	11.9866	12.0188	7.67567	7.51294	7.82656	8.07287	7.38527	7.60127	6.68795	7.71036	6.95499	7.68166	8.63448	6.96657	9.8856	7.68783	7.56639	9.36779	7.85725	7.95145	7.07039	7.79291	7.4723	7.64682	9.22405	8.41857	7.4587	6.57748	7.52011	6.52176	5.43105	7.49898	7.61094	6.7388	8.4758	7.6734	8.10767	7.66354	7.14921	8.10959	8.27792
RAB27B	7.74863	8.61863	7.0561	8.55454	9.23357	9.29863	8.8815	8.80639	10.4615	9.37134	7.99205	6.77217	6.51827	6.82127	6.52519	6.99289	8.69425	6.43911	6.67263	6.90592	6.35114	6.49786	7.31571	6.58165	6.56255	6.69621	6.42215	7.25165	6.48416	6.68964	7.23916	6.98777	6.57496	6.19027	6.24312	7.60838	6.36896	6.32468	6.46667	7.05636	6.33443	6.6432	6.37935	6.54355	6.49463	6.52788	6.83652	6.66158	6.20442
AIF1L	6.66666	6.89788	7.36313	7.22602	6.68584	6.66681	6.73853	6.96439	7.23573	6.78267	10.9218	8.40465	8.41376	9.3587	9.97744	7.83949	11.1091	9.21942	7.89327	11.9813	9.14082	7.95394	8.71909	9.15554	8.14954	10.3863	9.10424	7.80638	9.58224	9.32356	8.29057	9.23845	8.47064	9.25852	9.09439	9.40649	9.14503	9.34021	9.10947	8.4474	9.97987	8.15317	8.44453	7.71243	8.13295	8.25643	9.86998	8.29345	8.21287
MCC	8.1089	8.57748	8.03796	8.33969	8.50204	9.27621	8.93768	8.95217	8.91457	9.11315	6.25116	8.5291	7.07582	6.87275	6.3883	6.70531	7.42583	7.10235	6.23597	7.27435	6.71691	6.56736	7.00757	6.24998	7.51011	6.27907	6.57153	6.90982	6.68193	6.82479	7.97412	6.96176	7.02921	8.62417	6.89435	6.6837	6.87803	6.34423	4.80506	6.0844	6.77242	8.68632	6.8242	7.29108	7.46802	7.2233	7.19598	7.5756	6.14053
MUC1	10.4116	10.9585	11.0134	10.688	8.78056	8.73143	8.631	9.05171	8.35943	8.55815	11.8705	11.7272	11.0073	12.5722	11.6341	11.5087	11.9466	11.7357	11.2957	12.2425	11.2412	11.5699	11.5681	11.8548	11.4554	11.2006	10.9728	11.6402	11.1393	11.4461	11.1226	11.0973	11.0592	10.8568	11.2231	12.1306	10.6974	12.3545	10.4469	11.555	10.7327	11.9269	10.9244	10.5183	10.5039	10.5973	11.659	11.0271	10.7256
C8orf88	7.05408	7.51545	7.35372	7.52948	7.55736	8.19624	8.27603	8.23412	8.07027	8.03803	6.58378	6.5282	6.40624	6.72057	6.93069	6.47	6.27042	6.98496	6.57195	7.4537	6.59951	6.51757	6.40956	6.8109	6.55513	6.69666	6.57646	6.57194	6.28362	6.35372	6.47329	6.62333	6.64579	7.0259	6.19772	6.67145	6.94985	7.06529	2.20498	6.25351	6.71331	7.10037	6.81539	7.06185	6.73613	6.58252	6.30861	6.67274	7.81311
KCNT2	6.74441	6.75356	7.20829	8.70465	8.53754	8.69663	10.3684	10.1832	7.85301	8.29703	5.24595	5.13711	5.92098	5.02195	5.0867	5.90739	5.2074	5.4841	4.84235	4.7686	6.71679	5.03273	4.62592	4.93959	5.62519	8.03096	5.40767	5.31741	5.88901	6.71137	5.80739	6.45381	6.43495	6.17501	5.63383	6.06601	6.92131	4.72167	3.32625	5.32724	6.28649	7.46559	5.75182	6.35	6.54731	6.53991	5.79653	7.00039	6.04995
WBSCR22	8.35033	8.14368	8.74209	8.30102	6.88811	7.04376	6.83066	6.83748	7.40028	7.1455	8.77338	8.41725	8.71804	8.38964	8.52468	8.56371	8.08411	8.86728	8.74579	9.67509	8.27485	8.65095	8.69862	8.54611	8.76024	8.55194	9.34892	8.53401	8.66181	8.69447	8.56091	8.55569	8.709	8.89773	8.68095	8.89887	8.11568	8.15724	7.74862	8.47433	8.08602	8.46942	8.37082	8.51605	8.48071	8.70628	8.17059	7.89741	9.02733
U47924.27	5.40882	5.25464	5.56177	5.41305	5.24344	4.88357	5.40963	5.19149	4.98548	5.66132	6.65757	6.67253	7.0106	6.60006	5.85045	5.74174	6.31284	6.09892	6.58931	5.83057	6.92915	5.77225	6.77131	6.97591	5.9639	5.94068	5.91627	7.27425	6.01905	6.90971	6.91244	6.50375	6.86719	6.71377	6.32191	7.95951	6.21114	6.45305	5.04011	6.57955	6.13587	5.65407	6.29152	6.73488	6.65619	8.06657	6.65393	6.05137	6.15395
IRF6	6.90237	7.29264	7.29983	7.61077	6.70377	7.02693	7.11473	6.54367	7.35951	8.09014	9.50541	9.01066	8.62669	9.43115	8.81063	8.9047	9.17051	8.96752	8.90963	8.827	8.76746	9.36595	9.00298	8.89543	8.31119	9.31481	8.65749	9.14266	9.53573	9.04692	8.45811	8.48242	8.564	8.89705	8.5074	8.63996	8.51554	9.19677	7.37657	8.35456	8.02201	9.9046	8.92958	7.86262	8.65783	8.41082	8.81867	8.80353	8.93725
SPINK6	7.85965	8.08936	7.68173	7.62341	7.55278	7.25997	7.59257	7.48328	7.67208	7.78893	6.80567	6.42133	6.76365	6.94482	7.0271	6.26293	6.12796	6.01496	6.30661	6.36404	6.57873	6.39811	5.74669	6.26675	6.27103	6.21291	6.59898	6.30914	6.15315	6.27547	6.58753	6.12092	6.3279	6.3094	6.22745	5.98529	6.20065	5.96104	4.46973	6.6931	6.38345	6.37561	6.40311	5.90475	6.09042	5.81173	6.11288	6.17318	5.92024
TTLL12	6.84671	6.65062	6.77195	6.93711	6.67695	7.32634	6.83593	6.91791	7.34512	7.24732	9.14408	8.40711	8.25642	8.87825	8.35643	8.69338	8.32655	8.06053	8.23286	8.42003	8.10334	8.81284	8.20456	8.78046	8.28782	8.49677	8.46421	8.68808	8.01894	8.77814	8.59271	7.95046	8.18197	8.05181	8.27911	8.44384	8.31678	8.85017	6.31563	8.1782	7.66734	7.38054	8.54083	8.08189	8.36353	8.20173	8.24028	8.02545	8.31331
MRPS27	8.2846	9.15448	7.99722	8.12945	9.12388	9.5042	9.35509	9.32476	9.54935	9.47061	6.68045	6.18898	6.79255	7.31663	5.88032	6.60756	5.84794	6.86663	6.05051	6.7378	6.32911	6.7704	7.80843	6.4174	6.30085	7.10996	6.92236	6.30887	7.08401	6.92478	6.03221	6.1807	6.0613	6.51944	6.34281	6.30986	7.22276	6.53793	4.88188	6.04659	5.87518	6.43288	6.89095	6.6449	6.86747	6.59319	6.2945	6.50065	6.22685
CLTC-IT1	6.65499	5.90769	6.25344	6.40764	6.9632	6.95804	6.98506	6.97975	6.71722	6.97731	3.77185	3.05704	3.8654	3.61133	3.6827	4.04363	4.14933	4.10423	3.61503	4.23085	3.11044	4.38986	3.69568	3.15466	3.53748	3.78266	3.72068	3.30445	3.32831	3.245	3.80872	3.37273	3.65945	3.53741	3.43296	2.87439	4.35766	3.72157	2.52806	3.74499	3.64357	3.51102	3.46437	2.63684	4.77384	3.96128	3.99978	3.04141	3.34773
CLK2	7.17839	6.98692	7.39129	7.35979	8.8342	8.96616	8.92046	8.7593	8.9582	8.87065	10.6381	11.1143	10.9838	9.95752	10.817	11.2168	11.2183	10.7586	10.9265	10.8737	11.0146	10.9218	11.2526	11.2823	10.9743	11.1795	10.9353	10.8902	11.1056	11.0485	11.0636	11.1427	10.9784	10.9867	11.084	11.2477	11.1616	11.1541	7.45899	11.0364	11.137	10.0431	11.0788	11.1415	11.062	11.1392	11.0778	11.0314	11.0373
HOXD10	6.62245	7.13302	6.11031	6.60425	7.92981	8.0396	7.65959	7.45163	8.65315	5.83444	6.23266	5.80114	5.96213	6.16924	5.92216	5.99673	5.84188	5.8509	5.87755	6.0003	5.89781	5.98375	5.79844	5.68406	6.85608	5.66682	5.87437	6.08404	5.82515	5.99739	5.77952	5.61561	6.57151	5.74121	5.66439	5.62944	5.69749	5.67276	4.26613	5.84899	5.88136	6.10679	5.72072	5.89641	6.1909	5.94279	6.04246	5.97029	5.79153
MIRLET7D	7.9795	7.80574	8.01457	8.74776	8.12996	8.63709	8.69514	8.73986	8.70316	8.71486	6.24664	6.05211	5.77592	5.88966	7.05306	6.38055	7.5689	6.12689	6.55505	6.69189	6.31714	5.6501	6.88629	5.96431	6.20633	6.54388	5.97013	6.32459	6.24702	5.91661	6.4858	5.65275	5.91026	6.77961	6.12176	6.41951	6.29831	6.87252	8.4601	6.45814	5.50912	6.98204	5.87134	5.56141	5.93343	6.8191	7.09293	6.43493	5.96364
UGT2B28	6.56983	6.28957	7.21563	5.98024	4.99704	7.45565	5.58637	5.31729	5.21471	5.78	9.74749	7.22977	6.75173	10.1733	9.11149	8.78669	8.1541	8.96321	8.973	7.05858	8.50169	9.70089	9.5283	10.015	9.04042	9.70525	8.0405	8.05103	10.7351	8.26091	6.97792	9.04442	7.68478	8.0532	8.56268	9.48703	8.67064	7.4641	6.88842	8.10847	6.69377	9.56811	9.74434	6.00805	8.34724	8.39864	8.29279	7.60596	9.32818
RP5-1118D24.2	8.61347	10.007	8.74352	8.74424	10.0941	9.85651	9.91597	9.84735	9.88396	10.3864	6.73983	6.04299	7.13359	6.0678	5.45426	6.82509	5.86463	5.9463	6.32598	5.87807	6.28724	5.68411	6.70038	6.40569	6.24945	6.14476	6.15511	5.69	4.76426	7.04815	5.0677	6.71813	6.74643	6.85264	6.01784	6.48313	6.02369	6.37551	6.41778	6.71484	6.79697	5.92873	5.99097	7.59067	5.9305	5.93613	5.51869	6.20841	5.091
ATG9A	6.99403	6.94462	6.91425	6.9162	7.22969	7.61257	7.2259	7.45545	7.71133	7.94168	7.8495	8.31684	8.40908	7.9909	8.1636	8.60975	8.25192	8.42509	8.36728	8.20921	8.32367	8.49449	8.46063	9.36808	8.26802	8.77624	8.56447	8.32609	8.62611	8.81327	8.47452	8.71466	8.50788	8.39332	8.643	8.93144	8.58405	8.74116	6.43291	9.13367	9.24845	7.7723	8.80336	8.73524	8.74701	8.67401	8.48515	8.65314	8.86384
LOC101929765	7.23239	7.33551	7.16004	7.14111	7.28684	7.10623	7.34206	6.89878	7.12153	7.36552	5.99728	5.85023	6.82349	6.14729	5.79739	5.61425	5.73607	6.20443	5.9061	5.67307	5.60843	5.75943	5.58618	5.8478	5.84906	5.66859	5.68728	5.61605	5.6826	5.95812	6.12102	5.8759	5.63834	5.51122	5.55594	5.66609	5.6497	5.41537	3.96618	5.69402	5.56501	5.63395	5.56834	5.73385	5.33591	5.83048	5.56221	5.34522	5.44056
TRPT1	6.49664	7.11851	6.81005	6.92457	7.19269	7.40091	7.49347	7.58253	7.81601	8.0009	9.15257	9.48476	9.27555	7.69139	9.41529	9.33369	9.0655	9.58159	9.09425	8.63086	9.18455	8.95857	9.22441	9.50851	9.07359	9.19899	9.1376	9.32168	9.39185	9.55104	8.99305	8.6242	9.39685	9.61275	9.48052	9.48055	9.30491	8.75863	6.28316	9.41019	9.50343	8.03122	9.11923	8.85766	9.12595	9.38199	9.5036	9.68483	9.41638
GOLGA1	9.09348	9.41899	8.99582	9.33044	7.98792	7.8953	7.97039	7.83321	7.72026	7.81083	6.99881	7.51153	6.88829	7.23652	7.10213	7.02479	7.53298	6.68404	7.04248	7.02981	7.02712	6.89461	7.27038	7.26584	6.91187	6.79897	6.93411	6.91985	7.18952	7.4299	7.30538	7.16884	7.39597	7.2326	7.1387	7.42882	6.84158	7.28467	6.43593	7.17157	7.39102	7.02637	7.12321	7.07313	6.81397	8.32328	7.60728	7.2813	7.32724
CRABP2	7.60167	7.80917	7.8714	7.52899	8.53741	8.38555	7.71239	7.59123	8.72966	8.17774	11.1075	10.1941	8.95213	11.2465	10.8102	10.7549	11.8976	11.5581	9.69951	11.2337	10.3682	9.36183	8.86615	11.5687	9.77732	11.6983	9.89842	10.0599	10.8544	9.89849	10.4702	9.82417	9.69945	9.65911	11.328	11.5227	12.0647	12.3158	10.9139	11.3327	10.0117	9.15575	10.2163	7.36471	8.41271	8.73411	10.2526	9.72687	8.97705
ITPR1-AS1	7.77692	7.88556	8.39938	8.01952	6.10296	6.25115	6.39007	6.23263	5.72756	6.27404	4.54021	4.55779	5.29327	4.75783	5.93864	5.02173	5.32519	4.60031	4.29363	4.80425	5.05089	4.545	4.33888	5.38013	4.28889	4.88091	4.75948	4.94831	4.97985	4.80654	5.13607	5.27783	5.30044	6.99513	4.87211	4.96904	5.05741	5.14497	4.93321	5.23689	5.09015	4.46523	4.77732	5.05331	4.8513	5.45907	5.73354	5.46574	5.08279
EMP3	9.21735	8.15852	7.48502	7.39733	11.0851	9.87761	9.86071	9.17	9.07919	8.84788	6.4677	6.33242	6.46572	6.115	7.39603	7.00818	7.25034	5.94209	5.88452	5.90257	5.64858	5.71553	5.87882	6.64695	7.049	5.74367	6.16691	6.62776	5.52978	6.24337	6.49139	6.63119	6.7986	7.14348	6.42565	5.9855	6.09462	6.89306	3.39332	6.49054	6.43388	6.10689	6.19497	6.71166	6.82013	6.87729	6.30897	7.54253	6.10668
CPED1	7.56561	7.75021	7.9886	8.31284	7.37372	8.32219	7.85473	7.91277	7.88473	8.84686	6.79082	7.23053	7.10245	7.2639	7.28254	7.09401	7.08704	6.92939	7.24477	6.74466	6.94029	7.24	6.71641	7.1882	6.88549	6.49426	7.35004	7.1503	6.62765	7.09746	7.16138	7.17659	7.3104	7.12016	7.09768	6.64316	6.58447	6.6223	3.7621	7.03707	7.18761	8.30165	7.0713	7.13738	7.20899	7.76497	7.01623	7.32021	7.1124
MAGEF1	4.87624	5.14618	4.88945	4.70402	4.82731	4.92889	4.97196	5.46424	5.69388	5.24816	10.1042	9.29522	7.81803	9.92146	9.93544	9.68985	10.0745	9.31038	8.78797	11.2477	9.18189	8.53327	9.18357	10.32	8.22185	10.5551	8.13825	8.00025	10.0969	8.38159	7.95618	8.99518	7.80868	8.22099	8.36924	9.66313	9.50836	10.9439	9.44838	8.11712	8.62327	9.77037	8.73174	7.74695	7.68483	7.10233	8.77677	8.19702	8.21019
TLR4	7.45884	5.82233	5.63105	5.38068	7.44785	6.59035	7.29771	5.96857	6.23212	6.30934	5.45736	5.3251	5.07303	5.13161	5.13096	5.90067	5.15493	4.79617	5.23329	5.10091	5.32517	4.9835	4.9012	5.27384	5.39957	4.83209	5.00746	5.5044	4.85931	5.00694	5.2081	5.35312	5.24641	5.15981	5.09216	5.03314	4.96828	5.4626	3.72878	5.51788	5.84264	5.12834	4.97042	5.23874	4.92962	5.67862	5.31735	5.79644	5.0121
AGTR1	5.44635	5.99227	6.95949	6.85789	6.27189	6.88358	7.42818	6.74284	6.67987	7.44006	5.13914	5.60185	5.89715	4.98416	5.28415	6.15908	5.39005	5.31679	5.42073	5.24016	5.3647	5.2186	5.16952	5.87783	5.38195	5.13052	5.73748	5.50018	5.24778	5.96483	5.92711	5.52411	6.47505	5.93665	5.37409	5.27557	5.42495	5.54968	3.47129	5.85566	6.60261	5.07705	5.69196	6.27279	6.32864	6.56872	5.60947	5.71099	4.94282
CP	8.93899	9.54141	9.67792	9.01199	5.97995	6.07581	5.74904	6.90367	5.88544	6.568	11.8135	11.3862	9.43049	11.256	9.99001	9.28991	9.49156	10.5362	10.783	10.9521	10.665	11.0377	11.2504	11.8642	9.83886	10.66	9.36484	8.54092	11.0089	10.8545	9.58009	9.29896	9.45558	8.69788	10.8674	10.542	7.03113	12.2078	9.95591	10.5596	8.2587	10.4388	9.42678	9.11396	8.99188	8.80314	10.0385	9.22587	9.89282
TMEM168	10.352	10.8046	10.3075	10.2132	9.2023	8.44376	8.53393	9.25533	8.78632	8.92618	8.12479	8.14459	8.15522	7.5731	8.05886	8.19154	8.43579	8.19774	8.08654	8.13284	8.1959	8.49051	8.25681	8.26887	8.35714	8.43992	8.23708	7.9515	8.68629	8.06964	8.08827	8.00183	8.07533	8.20145	8.06346	8.17769	8.12673	7.87866	6.90281	8.71245	8.19555	9.23571	8.17386	8.20854	8.18774	7.99525	8.01382	8.18032	8.28498
LOC100506236	6.17169	6.38584	6.3313	6.45509	7.19257	7.16145	6.961	6.65325	6.506	6.77456	4.42691	4.63814	4.66621	4.59701	4.62424	4.44863	3.7454	4.26885	4.69416	4.18947	4.22042	4.67989	4.74763	4.39164	4.63172	4.609	4.62132	4.51049	4.70614	4.44278	4.5644	4.33153	5.3076	4.78112	4.7001	4.22536	4.35042	4.14904	2.62309	4.56585	4.48805	4.64352	4.85704	4.89972	4.89574	5.49698	4.59553	4.8861	5.01914
NR0B1	5.66833	6.27793	6.18392	6.28309	5.81754	6.22058	5.75112	6.76447	8.33298	8.55708	5.33621	5.71777	5.32604	5.81841	5.26153	5.50036	5.5034	5.14588	5.6011	5.32862	5.45873	5.54273	5.40708	5.22397	5.39986	5.39205	5.18657	5.34059	5.5603	5.43751	5.31811	5.43695	5.59232	5.53199	5.46356	5.55658	5.36974	5.30807	4.51373	5.3485	5.19722	5.3001	5.36395	5.35336	5.68335	5.28819	5.22263	5.32115	5.68415
TNNT3	5.97611	5.95699	6.41455	6.21597	6.04254	5.78476	6.04836	5.75096	5.43676	5.74036	8.27501	7.79949	7.53257	8.35109	7.82585	7.84387	8.4738	7.8069	7.58602	8.55162	7.95735	7.74288	7.85043	8.52421	7.73421	8.14302	7.61579	7.92606	8.14217	7.85347	7.43754	7.73184	7.75929	7.5577	7.73059	8.4705	8.28139	8.92312	6.23271	8.00523	7.76066	8.18454	7.6251	7.42863	7.43731	7.37448	7.54966	7.6009	7.371
TAGAP	8.7138	9.57048	8.63873	8.7002	9.07202	8.24353	8.64465	8.10622	7.56869	7.55501	7.78686	7.16315	6.55161	7.15828	7.18755	7.68365	7.26971	6.72602	6.98653	7.01372	6.7287	6.79068	6.96921	6.84142	7.21817	6.15089	6.78753	6.8814	6.94827	6.51493	6.88477	6.98795	6.54054	6.2862	6.90212	7.09705	6.82326	6.87984	5.60999	6.9782	7.56856	6.91218	6.36938	6.5864	6.50228	7.12468	7.31383	7.34461	6.3335
TFPI	6.42195	6.84206	7.07993	7.21992	6.39893	7.08306	6.52992	6.92955	7.18011	7.82011	5.51252	5.70702	6.20846	5.17781	6.19068	5.99538	5.5525	6.00195	6.00197	4.98526	5.58053	5.91895	5.46893	5.38619	6.48599	5.2945	6.25337	6.10226	6.28802	6.31073	6.14329	6.17134	6.47634	6.05387	6.59676	5.22556	5.35504	4.88113	2.93673	5.67616	5.76236	5.33201	6.02115	6.54143	6.09309	6.685	6.01599	6.34481	6.42538
SLC35G3	7.7734	7.52517	7.73559	7.38535	6.74438	6.12676	6.67945	6.44112	6.49514	6.5977	5.19404	4.86851	4.90878	5.61634	5.48001	4.31634	4.45207	5.7555	4.83206	4.79395	5.07533	5.2834	4.43235	4.39728	4.98895	4.49342	4.85424	5.03565	3.65821	4.61854	5.04918	4.66493	4.698	4.77493	4.21728	4.24951	4.8711	4.32459	2.40673	4.72595	5.36968	5.0704	4.80201	5.20243	4.9939	4.38442	4.92815	4.17226	4.56551
RP11-210M15.2	6.1076	6.13285	5.92478	6.11451	6.68739	6.70737	6.77267	6.52307	6.39705	6.57266	4.41401	4.49311	4.16934	4.49285	4.37385	3.73571	3.95076	4.55926	4.29932	4.13089	4.02267	4.14667	4.04039	4.28398	4.22093	4.36316	4.21022	4.45353	4.34692	4.17142	4.511	3.93704	3.9755	3.96825	3.68668	4.14433	4.20238	4.26368	2.79877	4.52311	5.26326	4.62835	4.80261	5.30509	4.82733	4.45705	4.21813	4.14384	5.08193
CLYBL-AS2	6.43472	6.11167	7.05717	6.20664	5.46057	5.35649	5.52649	5.46139	5.03393	5.53345	4.48288	2.98011	3.04287	3.75606	4.31869	3.68894	3.90021	3.91974	4.45232	3.7158	4.26194	4.21781	3.43662	4.12071	4.12356	3.24922	4.52243	4.32468	3.72319	3.64067	3.9632	4.03713	3.46835	4.09617	4.00375	3.11568	3.91403	3.42997	3.02606	3.59504	4.16814	4.02948	2.85988	3.62776	4.12969	4.1882	4.31128	3.53232	2.7641
ARHGEF12	6.32825	6.42318	6.30006	6.1619	6.37957	6.55034	6.39996	6.35963	6.37231	6.46863	8.19861	8.39683	8.30265	7.39055	8.44623	8.50291	8.3161	8.16275	8.3885	7.99246	8.27256	8.39662	8.27841	8.253	8.32058	8.28294	8.36244	8.33903	8.30867	8.38934	8.4647	8.4052	8.35332	8.45755	8.42927	8.44167	8.33574	8.19538	5.77483	8.4635	8.34683	7.19856	8.34105	8.33796	8.32323	8.36735	8.18585	8.32655	8.3488
CELF2	8.82853	8.88285	7.96511	8.61336	10.1052	9.91009	9.96138	9.84078	9.46821	9.62301	7.77484	7.0172	6.90476	6.92006	7.1678	7.32524	7.97261	6.47913	7.32601	6.87356	7.92273	8.40507	7.85829	6.98935	7.49883	7.74606	7.10662	7.2385	6.56092	6.76296	7.36411	7.21628	7.04442	6.07909	6.92888	8.12102	7.22242	7.10773	7.21006	6.86274	7.39693	9.25439	7.02491	7.10414	7.14999	7.70093	7.79026	7.841	7.73739
SEC24B-AS1	4.64545	5.03268	5.68328	5.17282	4.16095	4.37283	4.92919	4.66103	4.53194	3.90251	5.51319	6.29087	7.05217	6.56091	5.77572	7.1762	6.11672	6.46772	5.78256	6.13498	5.8527	5.68042	6.46188	6.49173	5.94413	6.24851	6.88958	6.15617	6.04577	6.42669	7.23135	6.64993	6.19184	6.63906	6.761	5.76902	6.3888	6.29277	5.42457	6.49935	5.93825	5.8543	6.41123	7.13613	6.76922	6.84042	6.20723	6.76964	5.86415
AGPAT1	7.78048	8.09839	8.33341	8.15301	7.3921	7.23451	7.34102	7.4366	7.49309	7.66264	10.0116	9.75875	9.55932	9.27525	9.95602	9.78317	10.0169	9.88021	9.67748	9.95985	9.67133	9.81049	9.79187	9.98518	9.83624	9.8268	9.61075	9.97533	9.97289	9.80631	9.6102	9.73341	9.66712	9.84786	9.70103	9.85196	9.79495	9.87556	7.01447	9.85294	9.84916	9.26186	9.93786	9.71835	9.90047	10.0144	9.81815	9.76039	9.96808
CKS2	8.37689	7.83231	8.81287	7.93966	8.1428	7.27565	8.04986	8.34566	8.62755	7.56774	11.1112	10.6411	9.68401	10.2236	10.4898	10.5509	10.4646	10.5316	9.97174	11.0315	10.2719	9.28694	9.32816	10.8316	9.40235	10.6448	9.51073	9.79373	9.04488	10.0876	9.22817	9.94451	9.91283	9.67155	10.2179	11.3176	11.2837	10.9888	9.09169	9.8027	9.50838	10.7881	9.85596	8.56548	9.76148	9.07404	10.6741	9.43283	9.87431
RP11-171I2.1	6.03019	5.72528	5.42335	5.04562	5.02188	4.32986	4.70289	4.99582	4.29368	4.22189	1.7521	2.66885	1.94798	1.81734	1.26305	3.06682	2.20921	1.26813	1.54863	1.08743	1.17198	1.62134	1.11008	0.998663	1.84339	2.08681	1.91883	0.700908	1.16018	2.79811	1.36579	1.95507	1.60958	1.27115	2.08723	2.49359	2.20824	1.13018	4.67098	3.36324	2.56396	2.78163	1.91447	1.91729	2.3764	4.237	1.04406	1.48112	2.03064
IDH2	7.30809	6.75552	7.30346	6.50109	7.77435	7.46037	7.50191	7.23382	7.50033	7.13026	10.4263	10.292	8.19706	9.2623	8.97818	10.1102	10.3156	8.93796	9.44828	9.25012	8.2317	8.6974	8.17057	10.4628	9.74308	9.06843	8.697	9.32662	8.98279	8.38995	7.92931	9.14903	8.42402	8.16466	9.08301	11.0173	9.89034	10.7544	9.06278	10.1922	9.35272	10.3417	8.46924	7.04783	8.22111	8.11885	9.05626	7.99212	8.65033
CYP51A1-AS1	5.92067	8.22679	7.32143	6.93999	6.16104	5.7848	6.10129	6.38617	6.76388	6.28804	4.83351	4.80384	4.69031	4.79445	5.75698	4.91128	5.07297	4.55602	4.52811	5.59921	5.66571	4.96206	4.83	5.02375	5.15804	4.94817	4.81238	4.79776	4.60556	4.74504	4.91327	4.95515	4.66798	4.9529	4.49804	4.80754	5.29583	5.24363	2.04029	5.15946	4.99653	4.87093	4.80604	4.93956	4.91356	4.5173	4.82772	4.62991	4.10421
KLK8	5.79322	5.92014	6.33028	6.06102	7.4376	7.19768	7.88578	7.19629	6.18747	6.58292	9.64382	9.58981	9.22425	10.6261	8.78965	9.8728	9.33547	9.05065	8.32395	9.54198	8.72553	8.82462	8.67747	9.80495	8.14647	8.8302	8.50192	9.05843	8.46756	8.2473	8.39422	8.28638	8.2674	8.54354	9.09323	9.89163	7.67834	10.8915	9.54368	9.10764	6.5231	5.85179	8.89325	6.01746	7.59691	7.88446	8.81299	8.621	8.68346
HS6ST1	7.11057	7.06212	7.42074	7.10864	6.48138	6.60899	6.43759	6.4977	7.15631	7.25643	7.75675	8.69528	8.08963	7.82226	8.00068	7.91031	8.14438	7.6205	7.50907	9.28176	7.70415	9.10911	8.50319	7.49926	7.58979	8.80644	8.61621	8.04926	8.44923	8.09687	7.90767	7.92952	8.03831	7.88285	7.81415	8.10312	7.57143	8.38293	7.34375	7.76356	7.08733	8.45052	7.28284	7.51706	7.97709	8.16829	7.28269	8.20252	8.60455
MGAT4C	4.80912	4.03086	4.8037	4.46331	5.93444	5.55012	6.40203	7.27189	5.46228	3.80718	4.00835	3.64004	3.76743	2.97795	4.0997	3.41055	3.10459	4.02453	3.53135	3.5443	3.55188	3.70661	2.72238	2.88892	3.66382	3.43012	3.74687	3.74253	3.68235	3.50553	3.75544	3.4284	3.58562	3.63998	3.37102	3.88341	3.06462	2.60891	2.68729	3.70843	3.60607	3.73879	3.13961	3.18474	3.60008	3.42692	3.63893	3.31893	3.47089
KIF4A	6.90527	5.87119	6.7168	5.68596	5.51422	5.39481	5.44129	5.60521	6.50421	5.52126	8.3863	8.39891	7.80489	7.77607	8.78341	8.48306	7.98786	8.86653	8.30538	8.37663	8.30833	6.58189	7.29022	7.8527	7.13262	8.02818	8.38894	8.04879	7.23434	7.91817	6.69184	7.2146	8.62867	6.36372	8.38978	8.92009	9.84503	8.5694	5.36536	7.38382	7.65799	6.40809	8.20184	6.47976	7.73601	7.52948	8.47647	8.1324	8.88051
S100A2	6.08249	6.07682	8.76248	5.97017	6.68796	5.64047	6.31336	6.4405	6.98756	6.30204	9.3537	12.3916	8.86659	7.63413	12.1858	8.39378	11.8474	9.8664	8.40679	8.57501	9.60619	9.07627	10.0027	8.70757	8.4503	9.1757	9.59204	8.7039	7.96628	9.94778	9.47533	8.42907	9.91425	8.69161	7.57104	10.9725	9.19021	9.98285	7.26017	9.79397	9.17643	11.276	7.98015	7.55138	7.62026	8.73608	10.6483	8.94177	7.34137
EPHX4	4.66063	4.36002	5.49439	4.14536	3.73313	3.55038	3.73206	4.18311	4.10792	3.56464	6.59048	7.14162	6.72256	7.34353	8.56141	8.721	6.17001	6.6096	5.74206	7.12921	6.84825	9.05283	5.61661	7.85198	5.83847	6.89879	6.92687	7.72933	7.60433	6.93599	7.40576	6.6007	6.21303	4.79194	6.95829	9.71826	5.46338	7.9042	6.66185	6.67881	5.76722	5.01864	8.18261	5.57879	4.72691	7.24272	8.56251	7.33206	7.72991
APPL1	7.90174	7.91777	7.66787	7.69386	8.22515	8.50686	8.50235	7.93826	8.10701	7.7782	10.1372	10.3166	10.1509	9.35505	10.3749	10.3503	10.2031	10.1942	10.2013	10.0216	10.2698	10.3328	10.0609	9.80937	10.1334	10.1041	10.4108	10.1885	9.99064	10.2401	10.4424	10.0053	10.332	10.1943	10.2215	9.81423	9.60059	9.95247	7.84265	10.154	10.0512	8.86753	10.0927	10.282	10.1692	9.94808	9.96488	10.3288	10.1396
CWC22	8.87054	9.55597	9.03327	9.15864	7.83297	7.17364	7.44523	8.02105	7.43602	7.42661	9.42129	9.66083	9.07518	9.5082	9.59798	9.53312	9.53636	9.23039	9.25488	9.52319	9.04269	9.60762	9.26271	9.63134	9.67637	9.3715	9.32045	9.58637	9.68333	9.06651	9.29945	9.53715	8.96673	9.02849	9.42173	9.30813	9.51435	10.0502	8.0117	9.18642	8.91321	9.3277	9.38652	9.18404	9.40981	8.65963	9.33821	9.12268	9.14969
ARHGEF6	9.54026	9.53512	8.86325	8.68415	10.0207	9.55471	9.6764	8.9017	9.33897	9.47144	7.32152	7.17118	6.13833	7.27395	7.06022	7.39416	6.99574	5.85363	6.13952	6.0699	5.92319	6.10478	6.11828	6.90714	7.08166	5.42592	6.23526	6.67912	5.50539	6.11584	7.06326	6.73688	6.32059	5.52017	6.36671	6.65012	5.92342	6.90386	5.81271	6.66957	7.80734	7.88787	6.23235	6.70544	5.95624	7.28926	6.25111	7.88229	6.13944
NPL	8.91945	9.41833	8.84539	8.67188	8.17137	6.88836	7.86539	7.37715	7.22565	6.94296	6.40096	6.63337	6.35928	6.43257	6.37382	6.64471	6.34789	6.26221	6.62301	6.37693	6.29857	6.15665	6.12182	6.33057	6.6793	6.24431	6.49149	6.68549	5.92157	6.74599	6.47931	6.69679	6.56244	6.35177	6.42452	6.15699	6.53928	7.04518	4.78011	6.4669	6.90295	6.91723	6.32673	6.60177	6.50062	6.92738	6.76433	7.25217	6.53809
PTHLH	5.91988	7.29943	6.39188	6.30716	6.90102	6.7849	6.78408	5.53133	6.0877	6.28367	4.33353	4.67773	4.37597	4.20496	4.26082	5.0028	5.05345	4.64709	4.48804	4.60579	4.08646	4.19698	4.44959	4.35505	6.49078	4.48263	4.63467	4.84641	4.4636	4.56196	4.64395	4.50333	5.22904	4.39449	4.41089	4.32555	4.37978	4.40347	3.54859	4.96948	4.89326	4.7381	4.90583	4.78714	4.85099	5.58211	5.23152	5.20625	4.46822
BUB1B	7.12163	6.07568	7.69888	5.17265	6.82772	7.02063	6.35781	7.19958	7.92386	6.50681	9.72899	9.29548	8.10806	8.95655	10.1256	9.46578	9.61233	9.79719	8.91108	10.7999	9.1159	8.08079	7.47934	10.4279	8.55847	10.308	8.86004	8.87968	9.29833	9.26823	7.91846	8.02029	9.29179	8.11701	9.57331	9.75056	10.8296	9.85566	6.94604	8.74936	8.8302	8.15647	9.18429	7.63804	9.07566	8.43362	8.99135	8.95414	9.01481
LINC01116	9.69796	10.5421	9.37546	9.82616	10.3825	10.7702	9.65599	10.3758	10.9054	10.7233	4.57439	7.90863	8.25404	6.9204	5.73398	8.90776	6.60538	5.691	6.59493	7.13358	6.43544	6.5469	5.33349	6.49792	9.03493	5.68431	5.53494	9.0903	6.82563	5.97564	5.43251	6.0047	8.81112	4.75019	6.36697	8.14882	5.41309	6.07752	5.99385	5.79181	6.18871	8.07929	9.09531	7.47718	9.06872	6.72948	7.92554	7.26779	7.34995
CLDN11	7.45677	8.52027	8.26771	8.00744	7.904	8.98704	9.26581	8.41159	8.17647	8.90008	5.72522	5.82754	6.51774	6.32359	5.99688	7.03737	6.33821	7.44983	5.43941	6.29886	6.00704	6.24167	5.53331	5.67406	6.58111	6.34356	6.68261	5.77181	6.00184	5.47559	7.46195	6.72484	6.55353	5.31984	6.29984	7.98735	6.57808	6.31583	4.55637	5.62388	6.52118	8.89231	6.66414	6.37393	6.82847	7.38689	6.6568	7.67141	6.02431
GPR34	9.7205	10.309	9.64309	9.41922	7.82971	6.41077	7.81044	6.99791	6.77836	6.36203	6.35175	6.14705	6.04415	6.9721	5.85068	6.67034	5.64734	6.25422	6.49256	5.51323	5.63233	6.16155	6.08798	5.14498	5.89698	5.19688	6.13949	6.30001	5.68888	5.98348	6.42788	5.30331	5.94285	5.83644	6.36632	5.76544	4.85235	5.48761	5.1028	5.61353	6.99778	6.54801	5.72987	6.48206	6.35921	6.3196	6.18233	7.06801	5.49633
LOC255654	5.55571	5.50727	6.293	6.08247	5.78038	5.29835	5.52545	5.19393	5.46914	5.53784	7.51428	7.51669	7.68065	6.70829	7.67931	7.67087	7.26775	7.84007	7.66735	7.13186	7.75039	7.64025	7.74697	7.72452	7.77178	7.45448	7.79675	7.85661	7.52569	7.84664	7.69973	7.61966	7.97774	7.68708	7.76685	7.49014	7.4687	7.44361	6.77577	7.68977	7.71538	6.90646	7.92232	7.93751	7.778	8.03584	7.64014	7.83564	8.03865
S100A1	5.9792	6.41574	7.19375	7.52877	5.28649	5.85519	5.29226	4.90142	4.78389	5.28747	8.80878	8.4887	9.25407	11.0014	8.79094	8.45285	9.81883	8.78279	7.869	8.96745	8.43259	10.4405	9.87938	9.67464	8.75666	9.46066	8.59015	9.90511	9.75419	9.14461	8.55622	8.74379	8.32375	8.62361	8.86694	9.70134	7.03028	10.7182	5.04136	10.1186	8.09304	10.8329	8.53645	8.57996	7.79329	8.07797	9.57268	8.76945	8.94969
ELMSAN1	8.19597	8.7717	8.26503	8.49893	7.56077	7.82457	7.51796	7.62531	7.62815	7.9554	6.71477	6.17262	6.17818	6.28406	6.18632	6.6172	6.49758	6.73962	6.37136	6.22649	6.7067	6.00557	6.01534	6.36288	6.04973	5.71807	6.33477	6.11766	5.87316	6.76345	5.74685	5.88925	6.37661	6.37195	6.25258	5.86448	6.21511	6.24868	4.9965	6.00451	6.29766	6.04323	5.8378	6.09984	6.28328	5.82109	6.34323	5.99642	6.27268
LINC00310	6.91502	7.55493	8.40182	8.18171	7.13426	7.13446	6.88751	6.56526	6.43289	6.95371	5.1801	5.40632	5.31365	5.66945	5.64999	5.95298	5.05361	5.32821	5.41116	5.08541	5.49894	5.34621	5.23127	5.15119	5.21353	5.39649	5.26162	5.04149	5.45305	5.2931	4.79047	5.51456	6.00283	5.33577	5.43219	5.79228	5.78305	5.08568	2.44609	4.85445	5.07862	5.39476	5.78515	5.72143	5.78402	5.96176	5.50984	6.04828	5.67043
MMP7	5.56433	5.6498	8.80188	5.59586	5.31682	6.4794	5.39151	5.5877	6.77228	6.07901	10.3163	9.88195	10.1034	10.2912	7.92007	8.86251	12.4125	8.9218	8.37562	9.51061	7.5404	10.8642	9.91786	7.81701	12.4307	9.5815	8.44441	9.59555	9.807	10.2588	10.3611	8.61161	9.86153	6.3184	8.37358	13.0991	11.7655	12.2689	11.4488	7.06649	6.93597	13.2694	9.6331	6.54235	9.49168	7.94184	8.46609	10.8573	9.41032
ENOX1	6.67845	6.80793	6.46626	6.44235	6.9104	7.65968	7.64219	7.92072	7.84848	7.30401	6.02506	5.68358	5.53316	6.02992	5.7402	5.73023	6.16925	6.01481	5.95252	6.22832	6.20552	7.22748	5.58279	5.22274	6.13023	5.61145	6.22949	5.89403	5.53566	6.27188	5.65081	5.95628	5.89014	5.82781	5.64368	5.59199	5.48804	5.48482	4.98401	5.1302	5.49789	6.98272	5.42508	5.41802	5.48784	5.73392	5.92595	6.92076	5.51889
LOC102723809	5.9598	5.06175	5.03579	5.5146	5.40166	5.89993	5.75035	5.73469	5.84535	5.5953	3.347	4.96527	3.5333	4.77902	4.3806	3.42374	2.7735	4.18578	4.06842	2.76051	3.626	3.86855	2.88468	3.41425	3.4163	3.72847	3.27469	3.86233	3.77657	4.00774	3.84837	2.87252	1.15965	2.92497	2.85469	3.08518	3.47462	3.25506	2.80479	3.14889	3.365	4.06307	3.37309	3.75567	3.98338	2.82944	3.93978	2.33865	3.5593
PIP5K1B	6.40239	6.76597	6.29919	7.01882	7.84643	7.667	7.89	7.47985	6.4294	7.32503	6.25588	5.68135	5.99247	6.42242	5.67031	5.70796	5.65549	6.05065	5.86026	6.06168	6.15738	5.58883	6.30424	5.13366	5.5941	6.47315	5.93497	6.33712	5.45521	5.77535	5.98827	6.02668	6.09459	6.35231	5.91473	6.42545	5.72575	5.4933	4.72362	5.80658	5.45371	6.19237	5.97051	6.1445	6.43827	6.56229	6.08453	5.78027	6.44121
C8orf4	3.33298	4.58796	8.0441	4.42047	3.43703	6.36668	3.98606	2.28811	4.06108	3.70904	9.92931	6.25752	7.51491	8.88554	9.22248	9.04641	6.70863	6.9049	6.79618	8.10177	10.288	7.96886	8.06661	12.2347	8.8017	11.4683	6.2764	8.69976	9.6621	7.07163	7.45205	7.91758	9.70405	3.52295	8.17854	7.87331	5.47144	11.987	7.14214	8.04239	5.97625	8.73721	5.57698	6.64182	2.65796	8.16767	9.5861	9.14126	6.05836
ARHGAP18	9.78519	10.3095	9.13369	9.69189	11.3674	11.2522	10.9844	11.1476	11.1894	11.1028	8.83384	8.30164	8.04052	8.16483	8.2311	8.63752	9.03575	7.90136	8.05831	8.86177	7.25753	8.1036	9.19282	8.23232	8.97817	7.45586	8.22157	8.05674	7.41755	8.13392	8.17118	7.80584	8.48079	8.03607	8.16677	8.76979	7.4329	8.71362	7.27113	7.70096	8.29435	9.59713	8.52919	8.19418	8.26895	8.37336	8.54019	8.76843	8.24577
CA11	7.67971	8.23335	7.86694	7.99358	8.0673	8.47435	8.2122	7.96445	8.1421	8.69146	6.24298	6.1878	6.31257	6.30342	5.98631	6.84581	6.46977	6.22709	5.28226	5.7583	6.36129	5.85489	5.71553	5.41073	5.88744	6.31584	6.76918	6.2698	5.96118	5.43146	5.7242	5.85381	6.14361	6.77602	6.12075	5.64722	5.69295	6.21203	2.58814	5.76931	5.97761	6.22389	5.70728	6.04741	5.89458	6.85444	6.05542	6.41458	6.56765
KLK6	6.45346	6.86978	7.3613	6.80315	5.82376	5.88729	6.05256	5.79395	8.12879	6.20227	10.1909	8.93134	10.255	10.8332	9.88799	10.5209	8.93547	9.99967	8.48906	8.61855	8.29399	9.0965	9.64617	9.35764	9.17137	8.8132	9.94721	8.84614	9.26601	8.46691	9.18375	9.4469	9.79406	8.66002	9.41773	11.5099	7.25137	11.4136	9.48465	9.04307	7.4717	6.4021	8.80315	7.43492	7.58651	8.46332	8.63461	9.07381	7.71237
MYZAP	7.61086	7.2089	6.67684	6.90209	8.82718	8.73115	8.74477	8.10702	8.57333	9.11414	6.57527	7.01193	6.58938	6.45739	6.51169	7.57373	7.8086	6.40936	6.56195	6.44214	5.86358	5.72325	6.40311	6.42295	6.8469	6.14273	6.50176	6.54686	5.91426	7.48592	6.97804	6.84817	6.6459	6.82902	7.38468	6.45118	6.42748	6.86737	5.89091	7.48824	7.25405	7.07952	6.61343	7.37797	6.8578	7.04702	7.63695	6.63373	6.19019
AKT3	9.5496	10.2011	9.96258	9.94303	7.51332	7.44797	7.33734	7.91294	7.61666	7.7884	6.71678	6.24884	6.80125	6.52279	6.69135	6.39425	7.05006	6.78239	6.69172	6.4139	6.69398	7.09601	6.83181	6.06356	6.84809	6.15778	6.86934	6.86199	6.14822	6.67203	6.69256	6.58183	6.67931	6.54174	6.45722	6.53127	6.13963	6.16891	4.27606	6.321	6.52479	7.68841	6.5164	6.73103	6.53729	7.04225	6.64877	6.88375	6.65321
KLF2	8.59141	8.91699	8.41006	8.71846	10.0909	9.86112	9.1103	8.75617	9.73955	8.36401	7.00521	7.5942	7.65369	6.59881	7.21288	8.28006	7.2373	7.53299	7.52433	6.73539	7.49218	7.62011	7.39536	6.79093	7.72781	6.78844	7.86788	7.83719	7.02854	7.68425	7.74703	7.40907	7.88036	7.66322	7.80119	7.17281	7.31664	6.75327	4.40142	7.44945	7.29443	7.25632	7.92165	7.99039	8.16733	8.83826	8.12599	8.47873	7.9011
C5orf24	7.63489	7.66704	6.94441	7.32736	8.20388	8.45584	8.34568	8.57179	8.87891	8.34637	9.59092	9.59613	9.32755	9.02352	9.5454	9.53449	10.0325	9.36812	9.4769	10.15	9.61296	9.60595	9.76949	9.87532	9.72882	9.75661	9.63588	9.46414	9.67768	9.61434	9.64309	9.68932	9.50104	9.7677	9.70473	9.63205	9.47041	10.0148	7.20735	9.63139	9.69953	9.78134	9.19697	9.03296	9.17985	8.95146	8.80028	8.99055	8.96097
MTUS1	8.33216	8.31521	8.18261	8.26544	9.04971	9.52385	9.52068	9.1867	9.99762	9.90892	7.42569	8.01932	7.00177	7.17554	7.17377	6.94654	7.4046	6.59856	6.9114	7.20759	6.94848	7.78591	7.33932	7.10667	7.32676	7.43459	7.05139	6.61431	7.37236	7.29736	7.42149	6.50574	6.91572	7.09351	7.03188	7.77806	6.8964	6.83835	6.50139	7.27224	7.13522	8.31311	6.71281	7.10401	6.62323	6.92242	7.29334	7.24111	7.2726
ZNF628	4.65439	4.61594	4.79218	4.06115	4.52114	4.53325	4.60776	4.52393	4.52506	4.92535	7.09699	6.69094	7.00278	7.24956	6.75757	6.80372	6.80693	6.71417	7.08598	7.08194	6.6687	6.85169	6.63658	6.81359	6.79231	6.88943	6.92896	7.19186	6.75895	7.20084	7.05508	6.82127	7.88516	7.63279	6.85423	6.63008	6.73412	7.05627	2.21809	6.826	6.87458	7.40748	7.63669	6.8602	6.92754	6.63293	7.16099	6.89948	6.9247
LRP8	6.02108	6.00839	6.20502	5.91706	6.06452	6.01622	6.30941	5.85461	5.96216	5.9363	7.97538	8.44435	7.06087	9.42109	7.93658	7.37283	7.3257	7.11261	7.72188	8.69643	6.92496	7.86533	8.09796	7.66905	6.21123	6.86198	7.15278	7.80328	7.49551	7.711	8.09043	6.6233	7.92814	6.4132	6.97548	7.70249	6.01164	7.19888	7.78541	8.05561	7.38035	8.08599	6.98498	6.51996	7.64671	6.87964	7.75875	8.2332	7.93142
SLC4A11	8.11455	8.03008	8.71916	8.22485	6.31191	6.17287	6.35009	6.34418	6.19798	6.00002	9.33669	9.21765	9.63454	8.87294	9.48078	8.2369	10.2963	9.88568	8.79068	10.2263	9.41735	9.7991	8.94481	9.97154	8.77018	8.35987	9.04835	9.33472	9.15728	9.60552	9.04406	8.50037	8.65777	8.3118	9.41456	8.81653	7.52884	11.348	8.96279	10.6342	8.05519	10.955	8.76904	9.04472	8.81444	8.13261	8.56816	8.02917	7.89333
RETSAT	9.58998	10.0022	9.12592	9.20995	10.8399	10.8756	10.9713	11.0945	11.0908	10.8105	8.07044	7.83655	7.24032	7.74252	7.27706	7.7373	8.67954	7.43905	6.92991	7.42568	6.35558	7.7444	7.64802	8.54357	7.47399	7.38777	7.68665	6.86061	7.05785	7.1538	7.37103	7.23441	7.52342	7.08936	7.57186	7.31935	6.647	7.21377	6.09347	7.30472	7.05746	7.56279	7.57275	8.27218	6.90957	7.07098	6.90971	7.20953	7.23322
TRIP13	6.6699	6.48531	7.22193	6.40198	6.55882	5.99007	6.56743	6.22776	6.89671	6.35989	8.57152	8.32784	7.18744	8.66877	8.51964	9.32911	7.76665	8.63493	9.16303	9.89581	8.7515	8.75045	8.00778	9.95924	8.88427	9.27409	8.74824	7.64423	8.8153	8.66312	8.08049	8.82426	8.65816	7.94154	8.8472	9.44962	9.16327	8.55041	7.24456	7.69396	8.63005	7.80441	8.63026	7.24341	8.12045	7.09446	8.04739	8.03855	7.32159
CCDC68	7.40717	8.20888	7.58192	8.20997	7.05198	8.3605	8.10424	7.74278	7.77326	8.25296	7.10635	6.70914	6.97946	6.40914	6.86849	6.52299	6.1204	6.60287	6.78825	5.83495	6.59852	7.34831	6.64722	6.01438	6.6823	6.06285	7.09214	7.33718	6.04858	6.27023	7.27408	6.88442	7.22345	6.65749	7.03026	6.11226	6.35427	6.81138	3.39968	6.25671	6.37099	6.38095	6.72498	7.25735	7.41545	7.96502	6.95535	6.89384	6.46492
MCM2	7.95688	7.80784	8.20554	7.66251	8.18352	8.40181	8.03676	8.19004	8.5617	8.64366	10.9962	9.95384	9.55561	10.3937	9.53509	10.5077	11.2974	10.7972	9.7456	10.9289	9.7714	9.60791	9.70481	10.4326	9.05799	11.7256	10.1468	9.16397	10.7803	9.62966	9.21328	9.20687	9.64761	9.48763	10.1257	10.4286	11.5916	11.3555	8.58997	9.44546	10.0238	9.04519	10.2409	8.7994	9.1617	8.87675	9.76422	9.25746	9.22869
DNA2	5.98814	5.85245	6.2703	5.93906	6.27859	5.43359	6.32887	6.33773	5.75512	5.37425	7.31199	8.15076	7.18926	7.04404	7.09148	8.57858	7.37266	8.06021	7.60901	9.03436	7.24132	7.24331	6.22906	8.66942	7.51546	9.20637	7.99549	7.56503	7.57907	7.87843	6.93052	7.56546	7.2587	6.66228	7.66052	8.23296	9.19912	7.98113	7.29301	8.31632	7.9519	6.05091	7.88331	5.94439	7.61878	7.33313	7.65445	7.32654	8.25593
NS3BP	5.27331	5.355	5.10666	5.16856	4.38773	4.33384	4.59952	4.6448	4.30845	4.71301	7.31604	7.16702	7.15713	7.19742	6.99484	7.09886	7.57936	7.09191	6.9939	7.37557	7.02995	7.02481	7.05723	7.05053	7.11713	7.19437	7.08237	7.02354	7.1085	7.12922	7.07736	7.26537	7.31858	7.23415	6.92729	7.55237	7.05837	7.48349	6.63643	7.34355	7.04712	7.02172	6.96947	6.97741	7.03493	6.85241	7.03647	6.73657	6.75415
FZD10	5.74166	5.60424	5.9174	5.36225	4.61037	5.05931	5.60901	4.73982	4.7843	5.80057	10.122	7.07158	9.60453	9.88015	7.05975	10.0183	10.319	6.84553	6.17291	6.68823	8.91067	10.1051	9.09687	8.89669	9.1314	9.08232	8.77053	9.23404	11.0647	6.67154	8.72237	8.22939	9.14604	9.06968	8.11053	11.0744	9.28271	6.8477	7.96152	8.63922	6.66335	10.6022	7.66848	5.2846	9.59765	8.49598	7.7361	8.08766	9.20075
PTGER3	6.43917	5.88552	6.44317	6.69654	8.01851	7.45597	8.366	8.72471	7.60218	6.34832	5.63261	6.6065	6.17287	5.70686	5.94242	5.94044	5.66225	5.71448	5.86622	5.68898	5.66129	5.83463	5.9882	6.52865	6.17128	5.4144	6.04495	5.98702	5.47551	5.85684	6.04931	6.07819	6.33604	6.0036	6.01583	5.91767	5.4591	5.52683	3.30058	5.80978	6.26827	6.13522	5.90308	6.2504	6.06308	6.82798	6.25114	6.03661	5.85622
ARHGAP6	9.30799	9.57613	9.12113	9.28519	7.74312	7.79437	8.09328	7.41846	6.83952	7.10343	4.71272	5.30691	5.62674	5.65721	5.28085	5.55339	6.40014	5.37972	5.32524	5.30671	5.93343	5.74559	5.50144	5.64783	6.00767	5.44829	5.01223	6.0232	5.0019	5.52089	6.15099	6.05494	6.89019	7.99647	6.62272	5.86477	5.55002	5.3631	3.52974	5.21357	5.45038	8.27872	6.03032	5.94331	7.01711	7.35086	5.67001	5.95358	6.43933
ZDHHC8P1	8.3525	8.69727	5.43684	7.79715	8.68472	9.64688	8.91218	9.65646	10.0921	10.5804	6.16509	7.7339	5.71383	6.93279	6.16868	5.46942	5.86609	6.29521	5.69647	6.72466	6.29729	6.55236	6.15898	5.0948	5.67857	7.0438	6.00742	5.75276	6.31857	5.3286	5.48603	6.06022	6.22513	6.40442	5.71169	7.03655	5.68532	8.31893	4.95435	5.45545	5.58322	6.10276	5.51197	5.34109	5.79088	5.37646	8.47487	6.61933	6.62515
RAB33A	6.18109	7.37511	6.07813	6.28247	6.78292	6.85725	6.06671	6.88274	7.14265	6.03196	5.69672	5.64443	5.60459	5.71418	5.59355	5.54067	5.45464	5.6127	5.54123	5.47771	6.13212	5.47127	4.9373	5.5598	5.59723	5.51979	5.40849	5.27028	5.43376	5.8224	5.22536	5.73219	5.77534	5.14386	5.33234	5.72931	6.42851	5.65182	2.7998	5.67196	5.88549	5.13781	5.04553	5.23612	5.1968	5.85853	5.18992	5.3099	5.55568
C9orf16	7.79807	8.16177	7.69172	7.54416	7.23299	7.08182	7.05857	6.95866	6.7437	7.13115	8.85544	8.57446	8.46289	8.15067	9.03348	8.00522	8.54168	8.38482	8.30326	8.35865	7.92327	8.36797	8.33331	9.00277	8.10675	7.89837	8.15189	8.62921	8.04485	8.12677	8.72657	8.21137	8.02795	8.13389	8.36677	8.82332	8.09891	8.19302	6.71004	8.13491	7.91555	8.76309	7.93231	7.93672	7.94685	8.41738	8.82383	7.99832	7.84276
CBS	7.9727	7.95668	8.27745	7.76683	7.41978	7.98124	7.24152	7.30659	6.79062	7.50022	10.0537	9.97597	8.59219	10.2338	8.02407	9.1536	10.6223	9.93486	9.14644	10.4443	9.03762	9.75661	9.12618	9.84901	8.3756	9.4762	8.75471	8.79938	9.75598	9.58847	8.64468	8.69433	8.8212	9.06096	9.97595	10.4177	8.7703	10.3436	8.39276	9.52068	9.52829	10.1329	8.98822	8.57127	8.99043	7.84097	8.54556	8.28098	8.38645
CNTN1	6.26311	7.51369	6.76375	6.61957	6.50491	7.62054	7.16667	6.18035	6.99574	7.88015	4.85785	5.32463	4.54445	5.08974	5.37798	5.44821	6.20366	5.12476	4.96103	6.05123	5.49091	5.24753	4.52656	5.0511	6.70117	5.53494	5.10729	5.18607	4.62518	4.92112	5.18063	5.06297	5.01395	5.46329	5.16344	4.80432	4.85856	4.61638	4.58575	4.82255	5.38473	6.96665	5.73731	5.09575	5.40133	6.38069	5.27347	6.66085	5.29965
CLDN4	8.14434	8.05834	8.28281	8.03895	6.51976	6.54256	6.65429	6.57169	7.09398	6.76026	8.91192	8.7192	8.5937	8.78131	8.31244	8.84252	8.64657	8.79855	8.64399	8.28659	8.56442	8.938	8.54722	8.9793	8.53576	8.82591	8.68484	8.36315	8.39722	8.58505	8.38724	8.29334	8.56992	8.49702	8.54599	10.0215	8.69389	8.46004	7.99775	8.47173	8.03509	9.67954	8.40624	8.46367	8.34645	8.34678	8.42968	8.17319	8.52783
H3F3A	5.14651	4.82987	5.15053	4.83954	5.95787	4.70975	5.70845	5.698	5.68859	5.35755	8.43557	8.15399	8.33604	7.28046	8.35766	8.13412	7.87537	8.53949	8.44113	7.53137	8.09437	8.37392	7.99982	7.61389	8.36101	7.94349	8.38844	8.40346	8.116	8.18645	8.47675	8.321	8.36805	8.34657	8.20258	8.23507	8.36917	7.801	4.30985	8.13163	8.03822	7.46538	8.44981	8.45424	8.46566	8.37445	8.25802	8.39475	8.32232
ST6GALNAC1	5.61585	5.20162	7.92101	4.93387	5.22096	5.52097	4.56333	4.86084	6.75937	5.3424	9.07144	6.64213	7.29899	11.8362	10.5621	9.7801	6.07794	10.7009	8.65483	11.3374	10.1697	10.5025	10.7142	9.29384	8.17962	8.25479	8.84923	9.25158	10.611	9.27937	8.04922	8.47559	9.5778	5.21782	8.37116	7.91803	6.06099	11.421	6.04285	9.83241	7.05655	10.8243	8.99814	9.1826	8.30547	8.83498	10.1344	8.65007	7.10377
LOC100130232	6.40071	5.06363	5.31125	5.97205	9.62487	8.62775	8.90645	9.65188	7.11114	6.99279	5.44891	5.71521	5.4317	5.80161	5.74017	5.97986	5.77653	6.05186	5.92415	5.53815	5.61625	5.85885	5.24698	5.04395	5.8326	5.43266	6.02184	6.07475	5.38252	5.57366	5.70058	5.68368	5.50396	5.75269	5.65008	5.46126	5.64783	5.53585	5.66917	5.73373	6.10353	5.84498	5.55833	5.76786	5.28092	5.56225	5.57015	5.8691	5.51401
HSD17B6	6.6668	5.3893	5.27523	5.71746	10.201	9.17781	9.81829	10.0759	8.00944	7.87011	4.8079	4.92574	5.73171	5.1011	5.16913	5.20838	5.74477	4.71621	5.00258	5.59498	5.61489	4.67647	4.46368	4.57853	4.71904	4.72069	6.07872	5.17464	5.16564	5.01047	5.27555	5.11162	5.67691	4.72207	5.6699	5.36607	5.92955	4.74001	2.49876	4.56324	4.95837	4.82153	5.19741	5.67624	5.14271	5.45367	5.29259	7.54283	5.21232
LINC00889	5.05756	5.03251	4.83825	5.05089	4.82656	4.86716	4.78093	4.70605	5.6093	5.98377	4.6238	4.32199	3.82727	4.22429	3.97198	4.03128	4.02119	3.78411	4.40047	4.60688	4.26326	4.34826	3.57655	3.32905	4.22109	3.7511	4.23979	4.27965	3.81519	4.25869	3.89039	3.79821	4.18522	4.32207	4.47353	3.22067	3.54413	3.4262	3.22373	4.03205	3.3503	4.04882	3.9016	3.90024	3.81576	4.17203	4.13225	4.63316	3.26217
LOC283177	6.92715	7.33884	6.83596	6.86679	5.6784	4.99471	5.08206	5.33877	4.90088	5.35702	8.94399	8.85546	8.6953	8.15986	8.89027	9.15356	9.38364	8.85758	8.98001	9.23415	8.86446	9.05392	9.31738	9.43926	9.15031	9.37536	8.77809	9.17059	8.95201	8.78733	8.98522	9.60385	8.93928	8.75477	9.05026	9.44675	9.20467	9.42806	3.54335	9.44964	9.30844	8.19706	9.35227	9.43615	9.34953	9.5163	8.98038	8.99489	9.11451
AC104667.3	4.76719	4.65751	4.57154	4.68388	4.59893	4.28754	4.71559	4.73063	4.63264	4.87054	8.5739	8.50794	8.92802	7.68662	8.30218	8.5938	8.58601	8.70326	8.84527	8.01455	8.6484	8.81157	8.78517	8.63902	8.78808	8.53114	8.64217	8.67371	8.53415	8.46182	8.63807	8.75364	8.46604	8.87753	8.54114	8.65027	8.64512	8.54648	1.50737	8.87738	8.72407	7.57696	9.14205	9.10206	8.78888	8.9706	8.7063	8.6609	8.72977
DPYD	8.66672	9.08846	7.97315	8.32996	9.66348	9.54144	9.69513	9.62856	9.46152	9.12397	8.04118	6.65784	6.1608	7.6079	7.30544	7.12982	9.29366	5.32768	6.03534	6.05476	5.13489	5.75755	6.72428	6.53477	6.76997	5.18032	6.04656	6.72167	5.22193	6.10505	6.62577	6.98155	6.27118	5.08007	6.09587	7.00847	5.51285	7.15191	4.63569	6.66759	7.7422	6.99293	6.60012	6.50392	6.34555	7.05155	6.84173	7.99278	5.47031
FOXM1	5.14719	4.63053	5.08049	4.6235	4.3743	3.28603	4.00129	4.26236	4.37082	4.7687	8.46635	7.65241	7.66641	6.72512	7.24527	7.65463	7.63848	7.61821	8.14672	8.58531	7.75009	7.02573	6.10181	8.53738	8.01403	8.72149	8.16614	7.76711	7.52259	7.96836	6.25681	7.61051	7.7024	6.37005	8.12301	8.52936	8.7329	7.51188	3.98741	7.31137	7.41208	6.22035	6.68376	6.30201	7.66257	6.87699	7.06659	6.7142	8.23616
CNPY1	6.95426	6.55737	6.30707	6.29998	6.19529	5.78363	5.89366	6.07406	5.83535	6.28278	4.09889	3.66746	3.67761	3.99062	3.45978	3.23967	3.88786	3.71565	3.64887	3.78904	3.59888	3.47253	4.00924	3.76628	3.50102	3.50378	3.57053	4.08599	3.7201	3.89759	4.01214	3.94112	3.75274	3.77727	3.67617	3.74967	3.84009	3.5881	2.14747	3.97911	3.51841	3.8772	3.78185	4.60298	4.11031	4.52215	3.83307	4.29962	3.68112
MREG	6.91387	7.20941	7.68284	7.08543	8.06778	7.87303	7.44766	7.83687	7.89255	7.66165	10.0357	8.42284	8.97411	8.72595	8.66655	8.37447	9.42766	9.13313	8.73903	9.27065	9.13548	8.93041	9.10258	9.83284	8.6325	9.67142	8.72737	9.18085	9.03856	8.93816	8.34381	8.47294	8.14356	7.1256	8.55915	10.2042	8.61413	9.24236	8.82233	9.00503	7.88345	9.89083	8.36167	7.87605	8.75755	8.09296	8.00879	8.33291	8.95826
LOC202181	10.1443	11.1595	10.4018	10.1934	7.43738	7.75049	8.46556	8.29054	6.96735	7.90839	6.15013	6.61616	6.51277	7.0018	6.32699	6.44671	7.10307	6.69448	7.40246	6.50613	6.78164	6.48104	6.73879	6.48154	6.30154	6.59268	6.35387	7.18246	6.66139	6.97507	7.32179	7.96006	7.83126	7.01532	7.46521	7.17021	6.72222	6.95316	7.09545	7.52809	7.92863	7.05296	7.10448	7.65956	7.45736	8.1782	7.68887	7.35397	7.14537
CMTM8	6.0091	6.4781	6.5611	6.60608	7.12418	6.59605	6.92301	7.07062	6.7758	6.68817	7.46709	8.27167	7.94452	8.91729	7.46377	8.86354	8.99795	7.72847	7.35171	8.47649	7.98411	8.07466	8.23038	8.11323	7.71418	8.32466	7.45451	7.85006	7.17019	8.19399	8.81323	6.86916	8.33143	7.15492	8.29626	9.5742	7.76944	7.5923	7.56126	8.16479	6.77318	7.14857	8.34037	7.84982	7.8939	7.43334	7.74428	7.94335	8.23422
CENPM	6.85008	5.86623	6.60831	5.56169	6.94446	5.88493	6.32534	5.98985	6.95768	5.93937	8.5487	8.70416	7.20289	7.5152	8.28405	8.08899	7.13383	9.47314	7.87945	7.92894	6.89831	6.90289	7.89189	9.08498	7.55856	8.30035	8.12785	8.75899	6.53517	8.15354	7.42807	7.77128	8.33336	6.31007	8.30898	8.14137	9.24137	7.60672	6.43705	8.45995	7.70397	6.86959	8.68317	5.95473	7.46411	8.81611	7.76243	7.78143	9.33239
ASRGL1	9.65701	10.1698	10.967	9.9025	7.55631	8.0959	6.33425	7.876	7.47075	7.47321	12.0553	10.1113	9.70944	11.2467	9.98473	10.5098	11.5367	9.78358	9.17638	10.2926	10.1557	11.086	10.4995	10.4273	11.3507	10.2419	10.185	9.80138	11.8841	10.5076	10.2468	10.8027	10.3345	9.51647	10.3175	11.1127	10.3478	10.1255	9.88379	10.4881	9.8801	11.5465	10.3303	9.72458	10.3822	9.83793	10.2957	9.88055	10.3878
TSPAN8	7.8112	10.0499	8.81807	8.27942	9.00769	10.3314	8.93111	8.93498	9.0139	10.9265	4.85771	5.74796	4.87845	7.78214	5.15497	4.81074	4.98245	5.04153	5.21038	5.59435	8.00703	7.17756	5.35943	4.58611	4.94092	5.8698	5.18272	4.97617	6.76726	4.92278	4.62335	4.88185	7.67444	4.69095	4.64399	4.81893	5.64161	5.26055	5.14551	4.45967	7.07201	10.9621	8.20679	4.78351	9.19546	6.91889	4.733	4.66293	7.71216
SH3GL2	6.30856	5.05805	7.0342	6.29931	7.09531	7.94306	7.83109	6.63736	6.38879	8.23574	5.21431	4.93099	5.2823	5.43131	4.89692	5.15273	5.50008	5.20697	5.20396	5.04413	6.05161	4.87496	5.37989	5.62764	4.83569	5.57361	5.56034	5.4157	5.25439	4.82938	4.86026	5.49075	5.01759	5.16452	5.29539	5.47505	5.50729	9.86172	4.27205	5.40145	5.02628	5.19897	5.16003	5.49073	5.55667	5.46702	5.54212	5.41234	5.84163
LYPD1	6.77986	6.96804	8.30609	6.58313	6.30689	8.05281	8.19116	8.12011	7.47197	8.22151	12.8516	9.39989	9.40908	12.5901	10.667	10.591	11.2321	10.441	10.1862	13.6129	10.1237	10.0612	12.6256	10.8172	8.56347	10.2397	9.13971	10.9775	10.3812	9.94467	10.2097	10.4411	10.3645	10.5003	10.0875	11.6995	8.80079	12.0662	6.73541	10.276	8.61529	7.15433	10.6964	7.8379	9.69082	9.61869	9.99023	11.0338	11.3807
DPP3	8.42642	8.30458	8.63928	8.38631	8.92304	8.4608	8.52832	8.42118	8.3891	8.40641	9.87659	9.3362	9.07171	10.6153	9.82812	9.22586	9.48308	9.3261	9.46388	9.42733	9.31837	9.26003	8.59273	9.40793	9.35467	9.53519	8.96633	9.00399	9.27755	9.61389	8.71128	9.25549	9.23818	8.56718	9.0589	10.128	9.94922	10.4868	8.32909	9.67782	8.95755	10.0406	9.5639	8.76303	9.08718	9.08542	9.62464	8.97615	9.39102
AP000347.2	6.61812	6.18312	6.2053	6.17045	7.11741	6.93833	7.07128	7.13461	7.34021	7.45504	5.38841	5.52445	4.80343	5.22874	5.68906	4.4703	4.88745	5.11239	5.66063	5.73684	4.71928	5.3907	4.42104	4.70644	5.27634	5.27034	4.93871	4.82907	5.24151	5.01491	5.24203	3.88218	4.38135	4.51385	4.80535	4.26245	3.62474	4.56372	4.82809	3.88363	4.94145	5.25035	4.66412	4.68038	4.40763	4.12405	5.35826	4.54468	5.44044
ZNF546	5.39118	5.59165	5.91889	6.15667	6.33656	6.52433	6.47959	6.96338	5.8651	6.07979	3.58894	4.19518	3.35063	4.72382	2.97935	4.01338	4.25225	3.87466	3.58525	4.60793	5.32858	3.68282	3.85698	3.94308	3.8904	4.4423	3.60841	3.23772	3.74211	3.90411	3.73196	4.78988	3.62616	2.70006	3.73137	4.27504	4.31337	4.13388	3.99304	3.86084	4.18036	4.35628	4.07761	3.51575	3.75231	3.5866	3.6066	4.13135	5.02883
RARRES1	8.46078	9.4287	8.90305	8.70091	10.769	9.46353	11.1033	11.2	10.616	10.4886	4.72663	11.0864	9.54001	5.13323	5.7219	6.36532	7.27653	7.26186	6.80265	5.32286	7.48835	5.83645	4.80417	4.75541	5.66465	4.97175	5.61422	5.62914	5.68627	8.03706	8.15195	6.24727	7.11041	5.26115	7.07366	8.31309	4.3762	8.88596	8.16087	5.67014	6.94494	6.42852	6.40207	8.85095	7.51813	7.58517	5.77098	8.27384	5.03864
RPARP-AS1	6.79644	6.89945	6.58508	6.17879	5.37341	5.45749	5.56537	5.6778	5.91973	5.90488	8.26878	6.72644	7.09342	8.23185	7.34502	7.12497	7.33433	7.27131	7.0759	7.66341	7.17556	7.3317	7.15548	6.99952	6.85038	7.05596	7.42361	7.43113	7.21298	7.29418	6.85244	6.61923	7.03526	7.39468	7.0885	7.10002	7.57257	7.33591	6.14028	7.34671	7.01921	7.92959	7.24311	6.78383	6.84194	6.83144	7.39451	7.29858	7.39015
RNF2	8.35226	8.75864	8.09921	8.31216	8.63938	9.32594	8.758	8.5821	9.19652	8.97973	5.86594	6.05736	6.07767	5.9236	6.11124	5.72537	5.92462	5.94597	5.7373	6.43605	6.43383	5.90593	5.90177	6.19518	5.80451	6.39767	6.17592	6.17723	5.92525	6.13079	5.93077	6.29894	6.4432	6.17681	5.6513	5.89942	5.91743	5.38997	4.22015	6.36983	6.42823	6.05988	6.3559	6.69411	6.06185	5.831	6.18478	5.53273	6.11461
RGS1	6.50725	4.94114	8.51375	7.87747	6.44038	6.32409	5.04319	5.56259	6.72534	4.14995	9.62333	10.539	8.3461	9.23752	8.55772	10.5644	8.95704	7.19618	8.74688	10.423	6.02602	8.0252	8.63996	9.20455	9.00126	5.95955	8.47731	9.36369	7.29922	7.90047	8.86865	8.6872	9.06947	5.76538	8.046	9.78893	7.18014	9.53338	9.9052	8.31348	7.7476	10.8774	7.95545	8.55073	9.08825	8.9421	9.02856	9.28399	8.02581
LINC01359	7.86965	8.90326	8.10361	8.04229	8.44777	8.37586	8.62837	8.27884	8.29298	8.81507	7.12832	6.58914	6.79164	6.95695	6.79275	7.04543	6.42955	6.90871	6.91256	6.89146	6.50328	6.68722	6.60041	5.97074	6.79476	6.3689	7.16809	7.0861	6.70691	6.74334	6.92169	6.4462	6.59494	6.65753	6.83802	6.60406	6.28186	6.31807	5.28323	6.52853	6.46467	6.91468	7.04613	7.20445	7.07838	7.12518	6.84897	7.17367	6.83106
LOC647070	4.90578	4.94396	5.33254	5.15202	5.49271	5.30076	5.25001	5.41076	5.27803	5.47021	10.11	9.21914	8.03299	9.94558	9.5311	8.80786	10.6929	9.50111	8.75972	10.9689	9.47642	9.27669	9.60488	10.0306	8.9475	10.1658	7.91504	9.24065	10.1978	9.15591	8.02671	9.36644	8.47217	8.99223	9.21441	10.2969	10.0883	10.6996	4.078	9.28015	10.3073	10.7402	8.99893	7.48334	8.20649	7.62693	9.4627	8.46584	8.4598
CMAHP	6.16352	6.04068	6.27714	7.38445	7.93595	7.88366	9.09976	8.09379	6.99399	6.96273	5.90354	5.59873	5.85012	6.1851	5.8087	5.54331	5.96198	5.53822	5.87349	5.33547	5.79485	5.6326	5.71136	5.92766	6.11497	5.92378	6.07664	6.39595	6.04209	5.53949	6.36195	6.12092	5.73397	5.60148	5.80056	5.55061	5.82155	5.43802	2.99433	6.1079	6.5303	6.4595	6.06919	6.43818	6.20475	6.34104	6.35192	6.61394	6.16099
KCNJ8	7.09685	7.50737	7.27096	7.24325	7.53225	7.98666	7.80933	7.28512	7.48816	8.42642	6.35301	6.21976	6.69815	6.22845	6.08203	6.95209	6.29963	6.00536	6.37329	6.01455	6.32503	6.40481	6.69926	6.01936	7.28957	6.26624	6.64051	7.16969	5.77896	6.54445	7.20744	7.0645	7.00341	7.26262	6.65408	5.93587	6.28602	5.99027	5.09634	6.29442	6.8828	6.45118	6.0319	7.38476	7.68679	7.15418	6.58651	7.31192	6.79084
UHRF1	6.51413	5.74957	6.92685	5.81006	6.66979	6.2393	6.56866	6.36368	7.33966	6.25162	8.16505	8.26999	7.23123	7.35608	8.8311	7.94223	8.55485	8.79592	7.92902	8.07857	8.20165	6.84383	7.07601	8.26098	7.31235	8.8207	8.39348	7.97504	8.13848	8.52826	6.39025	8.62371	9.02502	6.15577	7.74132	7.87658	9.15826	7.41374	6.11666	8.22863	7.58722	7.54065	7.282	6.90104	7.37948	8.13876	7.9583	7.0321	8.08242
MPZL2	8.70611	9.05749	9.04551	8.54365	6.32786	6.2105	6.42729	5.93792	6.54776	6.27148	9.5653	9.69579	9.38721	9.22141	9.31588	9.38201	10.9915	8.5611	9.1632	8.53012	8.97548	9.62757	9.04586	9.20948	9.41559	9.01415	8.8999	8.94543	10.1162	9.51755	9.04052	9.13335	9.51639	9.49734	9.04498	9.82918	9.30623	10.4405	9.16038	9.49773	8.91918	10.2097	9.05238	9.00787	9.2965	9.25176	9.18658	9.42101	9.03697
ELF3	6.88732	6.79712	8.11536	7.41512	6.71753	6.71246	6.80847	6.80645	7.95375	7.13011	10.267	9.74589	8.83897	9.13029	9.65362	9.72775	10.7655	9.10226	9.96059	9.48626	9.31365	9.8374	9.93073	10.1738	8.78739	9.89561	9.24014	9.25356	8.82641	10.3959	9.802	9.43038	9.91303	7.97518	9.84579	10.305	9.16308	10.1589	10.8832	10.2674	9.36567	9.89965	8.86964	8.92701	9.34896	8.47925	9.86835	9.40968	8.86658
SORT1	6.63268	6.43981	7.35331	6.57888	7.66073	7.43684	7.32228	7.67456	7.35891	6.59641	8.16795	8.28121	8.34021	8.61363	8.7996	8.8748	7.66133	9.00371	7.96076	8.9273	8.2275	8.50624	7.80158	8.83054	7.92506	8.26862	8.38554	8.09379	8.56997	8.36271	8.56093	8.34135	7.97739	7.87992	8.93614	8.1975	8.66657	9.2876	9.01621	8.40993	7.83212	7.46466	8.37647	8.66177	7.76422	7.74437	8.37719	8.29012	8.32475
FAM13C	6.57305	7.76424	6.83063	7.09696	8.02107	8.49081	8.83312	8.05841	7.20231	8.33418	5.57526	4.74861	5.18072	5.92772	5.01421	4.98881	5.21129	4.94568	4.94025	4.81568	5.40453	5.24361	6.67994	4.88867	6.2511	5.18156	4.61906	5.02572	8.15913	4.87151	5.65132	5.59088	5.28688	8.40788	5.26393	5.23513	5.29821	4.42503	4.34363	4.74746	5.27941	6.77254	5.4944	6.28196	6.46774	6.1379	5.35037	5.87907	5.54547
MRPL34	6.92514	7.32334	6.8699	6.82622	7.60332	7.52015	7.67402	7.82353	8.22141	7.9862	9.17868	9.49182	8.75666	10.2158	9.5983	8.98061	9.31917	9.61498	8.96482	10.3373	9.61032	9.59799	8.5864	10.4616	9.44977	9.5783	9.21242	8.6535	10.0557	10.2668	8.71941	8.74704	8.96514	9.09934	9.36533	9.46093	10.2366	10.4914	7.55627	9.53327	8.49685	9.97926	9.21118	8.9014	8.98718	8.67684	9.34598	8.88441	9.59654
VWC2	4.46935	4.14006	4.28999	4.35904	5.33786	4.71127	5.06705	4.93728	4.36486	4.82184	3.42666	2.5265	2.46636	3.43457	2.04669	1.90992	2.1846	2.27832	2.81277	1.6138	2.0014	2.72497	2.27403	2.0879	0.542815	1.44877	2.75556	3.18434	1.63256	2.67705	2.98795	3.57645	2.64078	5.53508	3.23821	2.32774	2.22544	2.56472	3.29827	2.09151	3.15793	2.02251	2.17748	1.85478	1.95551	1.58165	3.44216	3.48911	2.70558
MCM10	5.9685	5.79092	6.24881	5.76318	5.11338	4.86339	5.25995	5.2546	5.29469	5.07361	7.03045	7.60044	7.95497	5.8679	8.15036	7.89004	6.88616	7.88973	7.78817	7.23305	7.75049	7.50292	7.23735	7.45032	7.41916	7.75115	8.04829	7.57813	7.54484	7.81142	7.51382	7.32778	7.94807	7.56079	7.9099	7.06141	7.67018	7.25455	4.43601	7.40178	7.27424	6.06318	7.41273	7.2611	7.49941	7.72565	7.51257	7.7882	7.65997
SLC12A7	10.9432	11.7092	11.4369	10.8885	9.15921	8.12657	8.14377	9.33358	8.98851	8.91012	11.1583	11.1291	10.7936	10.0626	10.9558	10.9038	11.2129	10.9251	11.0579	10.2193	10.8369	10.9166	10.8533	11.1648	11.1466	10.9848	11.1505	10.9709	10.9855	11.167	11.0757	10.6884	11.1943	10.9092	10.9392	10.9089	10.6439	10.4986	10.2568	10.5652	10.8827	10.7617	11.0361	11.0032	10.6719	10.9082	10.9584	11.0131	10.1304
PP12719	7.40248	6.98938	7.24487	7.20603	7.30026	7.52216	7.03458	7.64493	7.52623	7.13387	6.10189	5.82548	5.31727	5.94932	6.39951	5.4031	5.67355	5.5394	6.17495	6.01171	5.93788	5.74274	5.67047	5.39361	5.97733	6.3156	5.77184	5.48959	5.43461	5.92831	5.82484	5.41296	5.92509	5.80555	6.07914	4.77854	4.98754	5.70651	2.91125	5.40458	6.31706	6.14272	5.42118	5.57635	5.20483	5.57527	6.04788	5.52321	6.18071
LOC101928002	7.44748	7.36569	7.45856	7.31174	7.47274	7.33695	7.65933	7.28175	7.18753	7.70912	4.87712	4.57907	4.00744	4.79187	5.41124	4.14069	4.6876	5.27342	4.60632	3.18876	4.30582	4.61433	3.48004	4.99383	4.79366	4.258	4.66268	4.46174	4.20336	4.18696	4.6642	3.50816	3.58833	4.15412	3.75878	3.44208	4.74508	3.53838	4.54938	4.27852	3.56996	4.48069	4.53797	3.99474	4.23046	4.24634	4.72086	4.34166	6.56924
LAMA2	6.51289	7.95688	7.16018	7.1876	6.25441	7.98189	6.62436	6.3331	7.00794	8.32045	5.3418	6.23132	5.86921	6.75047	5.13953	5.2282	5.30993	5.76466	6.20265	5.29313	6.55194	5.74459	5.14255	5.49375	7.16745	5.64483	5.44841	5.5752	5.4103	5.51981	5.5129	5.04223	5.25642	5.38452	5.8797	5.20473	5.07061	5.14082	4.29991	5.1978	5.48605	7.46223	6.24178	5.40055	6.6061	5.94432	5.19449	5.76419	5.58291
AMDHD1	6.07599	5.70596	5.18819	4.94946	6.10664	5.52127	5.26283	5.37041	5.78466	5.14352	3.86392	4.5104	4.37131	3.75006	3.78235	4.59596	4.18702	3.56292	4.87211	3.92414	3.40349	3.84216	4.53361	3.71221	4.19595	3.27917	4.37552	4.14826	3.71253	4.28038	4.18072	4.35869	4.5658	4.57863	4.30351	3.92039	4.99993	3.64006	1.46755	4.83602	4.38442	4.01212	4.40218	4.4893	4.76925	5.45021	4.29631	4.90977	5.23395
KRT222	5.06488	5.32528	5.31707	5.29034	7.00783	6.44249	6.49843	6.05549	5.86289	6.17508	4.5181	4.26232	4.56681	5.08125	4.55454	4.42914	4.1641	4.66914	4.8875	4.45035	4.73101	4.73093	3.92632	4.91349	4.73961	4.51411	4.61527	5.23358	4.83936	4.3124	5.14855	4.6848	4.47221	4.64199	4.66656	4.31957	4.52831	4.26679	2.61762	5.17235	5.5082	4.8905	4.7472	4.94863	5.00529	4.46809	4.7701	4.19768	4.58931
KITLG	7.25473	6.99348	6.7356	7.0574	8.93385	8.63192	8.61739	8.29597	7.91282	8.02943	5.68312	6.62964	6.40349	5.6802	5.58185	5.68117	7.03563	5.37055	5.82565	5.58321	5.8636	5.67256	6.05713	6.5462	7.84387	5.67498	5.7635	6.29027	6.0462	6.06403	6.45407	6.01844	5.91401	6.80292	6.39798	7.33027	5.8356	5.57368	4.61735	5.56741	5.97774	5.9174	5.82557	6.33752	6.90104	6.98418	6.30123	6.72703	6.37741
MMP21	6.39332	6.49286	6.35043	6.31736	5.35817	4.81211	5.52672	5.4037	5.34749	5.38922	2.67205	2.80592	3.38548	3.45327	3.34414	3.94719	3.11613	2.52091	2.55139	2.93339	3.70112	2.77987	3.65509	3.06164	2.58043	3.33156	4.09634	2.33298	1.81775	3.54314	3.98925	4.23065	3.4048	3.73443	3.60046	3.07242	4.40803	4.47992	2.23191	3.33471	3.5194	2.11165	2.90661	3.7185	4.17348	4.84292	3.86293	4.3136	3.58247
FBXL7	7.87265	8.54514	8.33078	7.94735	8.72399	9.03023	8.69136	8.36313	8.21408	8.96672	6.79359	6.93913	6.63022	6.81682	7.58749	6.72545	7.03718	6.46283	6.56139	6.89162	7.21176	7.65058	6.57165	6.29328	7.82603	7.28742	7.14685	7.05375	6.83143	6.68806	6.54183	7.08447	7.40709	7.55931	6.90484	7.41469	6.23262	6.1304	5.2946	6.44226	6.10495	7.46886	6.535	7.28775	6.74998	6.96346	7.25357	7.75489	6.3186
LOC100287704	9.6993	8.97984	9.07538	9.03523	7.76719	7.26366	7.37591	7.57186	7.69408	7.33878	6.32447	6.16973	6.1812	6.55622	6.57681	5.86332	6.04926	6.85884	6.48765	5.65489	6.27619	6.37776	5.60796	6.09916	6.22205	5.93053	6.79206	6.66536	5.88223	5.77855	6.16786	5.85604	6.65533	6.16377	5.69352	5.71908	5.53198	5.86847	3.77331	5.92571	5.6701	6.47937	5.98381	6.36605	6.60192	6.26799	5.8254	6.09319	5.86538
CNOT11	6.27362	6.31131	6.22804	6.0895	6.44322	6.45537	6.28107	6.51906	7.01128	6.40775	9.13133	8.19846	7.68351	8.43336	8.2194	8.22573	9.49482	8.68476	8.34874	9.82401	8.6182	8.782	8.38019	8.76645	8.78017	9.00386	8.30305	8.09668	9.39306	8.467	7.77307	7.96022	7.95737	7.56193	8.40507	9.3831	8.51925	9.83526	6.59501	8.33036	8.16552	8.68565	8.14908	7.808	7.98467	7.90938	8.52322	7.94811	8.23821
RP4-612B18.3	5.35522	5.35527	4.66803	4.80214	4.69072	4.86994	4.94456	5.11538	5.00712	5.3338	9.37587	8.49266	8.03946	9.0105	8.39553	8.65469	9.23307	8.45233	8.15034	10.1118	7.91898	8.51413	9.45826	9.42673	8.39569	8.77028	7.51982	8.21199	8.97604	8.60392	7.23235	8.41441	7.85576	8.15896	8.36265	9.23891	8.93008	9.81381	5.40068	8.42479	8.27383	9.63468	8.37558	7.45454	7.53352	7.35213	8.04506	7.87646	7.73791
C16orf59	6.38916	6.287	6.72802	6.33033	6.07523	5.77597	6.08761	5.97902	6.22204	6.14253	7.2942	7.6135	7.40754	6.91197	7.01906	7.01395	6.69995	7.33401	7.42902	8.10898	6.94463	7.0848	6.64227	7.09695	7.20213	7.67558	7.3339	7.01486	7.41225	7.27011	6.86208	7.30389	8.05158	6.99089	7.31596	7.23554	8.11442	7.24645	6.26407	7.19692	6.96475	6.68661	7.49502	6.60497	7.46585	7.39296	6.76861	7.2053	6.66978
FJX1	9.91675	10.4613	9.50611	9.55554	7.03221	6.8184	6.90306	7.55783	7.40174	7.67107	10.869	10.0964	9.98493	10.4097	10.2599	10.2267	10.2731	10.0956	10.6284	10.3057	10.1664	10.4057	10.1431	10.1788	10.3035	10.3891	10.3082	10.9015	10.45	9.91668	10.2094	10.3208	9.98116	9.97074	10.1629	10.2108	10.1079	9.9507	7.89193	9.96204	10.1793	10.5066	10.4366	10.3762	10.2836	10.5643	10.1369	10.012	10.5845
ARHGAP44	7.38775	7.84107	7.86244	7.95104	9.00183	9.31338	9.78488	9.44872	8.82379	9.04673	5.90546	6.35443	6.38412	6.22668	6.23254	6.66938	8.0664	6.94357	7.155	7.08103	6.79017	6.19619	6.93843	5.9704	6.73341	6.11358	7.05321	6.98068	7.20791	7.42912	7.08639	6.76863	6.9566	8.01801	7.08195	6.31544	6.94053	7.25005	4.50464	6.28081	5.85063	6.93016	6.62803	6.77901	6.92076	7.09386	6.36061	6.31368	7.05395
CXCL6	7.06922	6.27579	7.68314	6.78137	9.06217	8.87949	9.34756	10.1491	8.71495	7.75677	7.36736	8.3294	9.01373	6.31986	5.77236	5.69507	6.7791	6.07914	5.7651	5.51256	5.89741	6.34469	4.84727	5.07703	5.46654	5.22965	5.93065	5.52218	5.97424	6.23243	5.81574	5.29814	5.00263	5.02022	5.61378	8.16792	5.23927	4.90446	3.092	4.63075	4.54225	5.71964	5.27405	4.59073	5.35918	6.3088	5.75905	5.76533	5.31164
PBX3	7.62157	8.78216	8.06177	7.76702	8.75858	9.413	8.87008	8.41051	9.12411	10.1438	7.18711	7.83872	6.47465	6.81949	7.06571	6.86223	7.82069	6.72553	6.50117	8.00859	6.94957	6.40707	6.27197	6.64265	6.83791	5.70609	6.70425	6.74596	7.043	6.59306	6.64268	7.02851	6.58362	6.09716	6.84674	7.47823	7.50706	7.06209	5.79395	6.59725	7.62338	7.61594	6.74473	6.60443	6.26568	6.85214	6.77496	7.43562	7.2272
L3MBTL3	7.58665	7.53737	6.77474	7.25561	7.84782	8.61195	8.06888	7.78409	8.18686	8.21923	7.34219	5.94627	6.08652	6.17486	5.91885	6.85317	6.47855	6.01995	6.29257	6.48727	7.02239	6.31571	6.74001	6.92569	6.66873	7.13492	7.19496	6.33688	6.83904	6.01976	6.91275	6.51828	5.9755	6.24414	6.10722	6.59127	6.39573	5.9102	4.65392	6.15423	6.55112	6.96404	6.09171	6.78956	6.6707	6.27768	6.7798	7.06245	6.73049
KNG1	7.7854	7.88501	7.82323	7.8139	6.35609	5.60232	6.09677	6.01255	6.07841	6.04422	5.17026	5.23858	5.64571	5.2858	5.28645	5.56436	5.35875	5.25186	5.3514	5.22247	5.26613	5.21244	5.20534	5.42891	5.266	5.37737	5.36746	5.32863	5.16849	5.58967	5.18243	5.38414	6.50206	5.49571	5.22766	5.26731	5.3684	5.43324	3.39426	5.62866	5.48579	4.97325	5.33072	5.84318	5.30208	5.43936	5.0802	5.3645	4.96356
LOC101927151	10.8806	11.5922	10.5391	10.5126	9.69049	7.95583	8.22254	9.61592	9.18203	9.23477	6.18661	6.94738	6.85368	7.24112	7.01706	6.77097	6.13509	7.55538	6.1209	7.31886	6.6782	6.78476	6.46298	6.62952	6.64385	6.44841	6.68069	6.10879	6.65798	7.14216	6.44769	6.1582	7.22764	6.78336	6.44731	7.18832	6.79544	7.22595	5.37533	6.5438	6.48962	5.77918	6.02989	6.75054	6.57133	7.3519	6.71265	6.16305	5.97013
SBSPON	8.60618	9.44137	8.81618	9.66303	10.2062	10.2492	10.0418	10.628	10.8405	10.5187	5.77294	8.59052	6.21573	6.10765	8.04136	6.82897	6.67339	7.62827	6.47771	5.96125	8.81693	7.86168	5.95001	5.90321	7.59566	5.69572	6.18012	6.92564	5.22565	6.28455	7.06592	7.30126	6.25617	8.53278	7.45178	7.08572	5.59796	7.91849	5.42207	5.54693	6.00057	8.14874	5.47412	5.5811	9.04119	7.03597	8.99269	6.63537	7.1288
RP11-798M19.6	6.79593	6.47809	6.24358	6.53629	5.67147	5.70466	5.57179	5.93333	6.0853	5.92998	4.21017	4.05852	3.95456	3.75876	4.17053	3.58813	3.87089	4.20777	4.09472	3.57061	3.74426	4.08779	3.97436	3.50611	3.72309	3.80663	4.36092	4.34428	3.84765	3.81897	4.0605	4.3213	3.4135	4.22647	3.6086	3.77738	3.75175	4.25694	0.828739	3.71191	4.08923	3.68136	4.12445	4.97451	4.22364	4.44501	4.26301	4.1	4.21003
HBM	6.70266	6.47622	6.74761	6.54703	7.79577	7.23121	8.6069	7.07474	6.25599	6.96576	5.67213	5.67111	5.58105	5.53552	5.62003	5.65307	5.42813	5.69598	5.63224	5.39033	5.60469	5.61503	5.64295	5.64434	5.2787	5.57747	5.52816	5.23755	5.72678	5.06212	5.45591	5.23271	5.77869	5.52086	5.6142	5.47443	5.45717	5.66575	2.41453	6.04825	5.69619	5.6056	5.70253	5.2927	5.51099	6.00318	5.41947	5.59784	5.42026
PLXNA4	6.59405	6.81017	6.58289	7.27891	8.29852	7.79073	7.60956	8.59319	7.82883	7.68933	4.79078	6.84917	5.8871	4.74968	4.76947	4.50953	4.94725	5.48696	6.27739	8.00775	7.2887	4.73392	4.67156	4.36501	6.37672	5.66867	6.09769	5.48599	6.4965	4.98243	5.0302	6.14837	4.56207	5.11684	4.75076	4.36378	4.87925	4.85501	5.25518	4.44929	4.8312	4.76457	4.43271	4.39417	5.24943	5.33922	4.67829	5.55463	4.67324
MOSPD2	9.84447	10.5536	10.3478	10.097	8.26051	7.67271	8.1094	8.76851	7.96686	7.98724	7.6691	7.85341	7.8175	7.56911	8.00387	8.30471	7.66369	7.61448	7.74558	7.34647	7.96063	7.78494	7.57149	7.77902	7.95239	7.53841	8.17024	7.90447	7.68266	7.69348	8.04963	7.81047	7.91613	7.87824	7.86123	7.75598	7.61151	7.49588	6.76036	8.06063	8.14404	7.09917	7.72628	7.86675	7.71671	7.83232	7.7627	7.93642	7.65274
MARK3	8.19368	8.40848	7.75921	7.97214	8.92796	9.02052	9.14624	9.16412	9.41015	8.90705	7.20754	6.86711	6.99668	7.42534	6.58043	6.87353	7.60062	7.02332	6.99885	8.34375	6.83415	6.13983	6.35416	6.96142	6.80452	7.05581	7.28006	6.60496	7.34973	6.99302	6.24331	6.42182	7.03854	7.03623	7.09258	7.32574	7.25081	6.71146	7.10881	6.86866	6.85726	6.30516	5.79066	5.91734	6.5083	6.42001	7.21726	6.81322	6.67225
TIMELESS	6.67085	6.22476	6.99968	6.44183	6.98848	6.82063	6.76523	6.79389	7.09456	6.7742	8.25286	8.24885	8.01997	7.86558	8.62496	8.5365	8.25797	8.92333	7.93631	9.36713	8.60457	7.528	7.48216	8.84401	7.81333	9.72076	8.43187	7.47424	8.60942	8.58254	7.51599	7.8863	8.13327	7.54261	8.27542	9.26606	9.98506	8.97251	7.34164	8.29729	8.526	8.02509	8.51472	7.49059	8.03197	7.75963	8.15404	7.72964	8.39217
GYPC	7.893	7.95108	7.8691	7.54781	8.96117	7.51738	8.29936	8.75417	8.10206	7.77999	7.32487	7.01758	7.23714	7.15349	6.77674	6.80418	7.21779	6.54737	6.84967	6.46289	6.58543	7.14394	7.03575	6.55002	7.08395	6.42802	7.27913	7.31946	6.79418	6.97754	7.43019	6.99998	7.69681	6.47664	6.85398	6.83303	6.52081	6.61383	5.20924	6.6912	7.17587	8.77352	7.31499	7.35798	7.43364	7.7538	7.19675	7.77503	7.20653
GATM	7.69255	7.71448	6.90942	6.30188	7.7374	8.47369	7.33823	6.48908	7.89755	8.3722	5.42916	5.65439	5.45054	7.08919	5.52205	5.62193	5.57753	5.22343	5.23065	6.38686	6.44025	5.90211	5.80807	5.25063	5.20074	5.74323	5.51857	5.41801	6.13903	5.40811	5.51422	5.97382	6.09098	5.60356	5.42806	5.60256	6.37431	5.45488	4.8683	5.30883	6.09305	8.71352	6.29334	6.1777	6.27255	6.23545	5.21648	5.81786	6.57518
NCAPG	6.28992	4.58954	6.59335	4.68026	5.72011	4.83119	5.05506	5.52825	6.05431	4.54941	7.37183	7.76639	6.6768	7.68137	8.27819	7.59711	7.5032	8.75852	7.47838	7.33343	7.20421	5.85419	5.32458	7.94313	6.39116	7.22725	7.65298	7.2938	6.83499	7.54756	5.81799	6.63736	7.5885	6.11736	8.29423	7.53961	9.23203	7.26178	4.68755	7.38694	7.79286	7.80748	7.33977	5.66058	7.17259	6.95968	8.13727	7.41945	8.21689
RASSF3	8.03531	8.91175	8.27403	8.32652	9.59108	9.62871	9.45871	9.34199	9.25184	9.30823	7.42876	7.66065	7.28707	7.08082	7.83978	7.32611	8.10087	7.04031	7.17694	7.93225	6.74749	6.72326	6.75711	6.5655	7.05984	7.03093	7.05166	7.3621	6.43786	7.07204	7.39108	6.91819	7.59772	6.62011	6.89017	8.40758	8.23167	6.93518	5.10899	6.83276	7.25456	7.69204	7.10403	6.82117	8.02056	7.76944	7.09373	7.70434	8.12811
TCF7	7.62456	7.73529	7.84049	7.56757	8.7283	9.00234	9.11771	8.50756	8.69171	8.73296	10.0549	9.47685	8.82121	10.4013	9.615	9.04736	10.8529	9.69659	9.38144	10.8977	9.87357	9.47602	9.70278	9.54338	9.40858	10.1031	8.87072	9.66233	10.1359	9.77364	9.28307	9.72868	9.52875	9.99763	9.70148	10.1187	10.025	10.6779	8.80749	9.5206	10.8591	11.604	9.79234	8.40907	9.17	9.07264	10.1443	9.64484	9.88916
LOC101927377	5.19982	4.69205	4.86492	4.68219	4.43536	3.79454	4.37152	3.77119	4.30877	4.13276	6.15151	6.61983	6.95522	6.52813	6.82712	7.02638	8.05011	6.8621	6.45892	6.61306	6.24414	6.71021	6.49503	6.64135	6.58992	6.17482	7.00066	6.87151	6.20752	6.46668	7.27336	7.08506	6.69389	6.53006	6.88178	6.80546	6.30258	6.58422	5.19523	6.61999	6.66473	6.14809	6.59506	7.3129	7.17084	6.96998	6.36596	6.31827	6.86636
ELAVL2	7.44642	7.36641	7.98842	7.60673	6.277	6.10805	5.98002	6.25641	6.42628	6.0256	5.23568	5.48059	5.54102	5.37665	5.44148	5.37178	5.28923	5.09359	5.55806	5.5576	5.38128	5.39928	5.39476	5.41611	5.54733	5.1475	5.48627	5.82571	5.30374	5.1451	5.13223	5.52439	5.70268	5.44312	5.54043	5.20821	5.49187	5.23289	3.5956	5.43605	5.46454	5.75252	5.92835	5.97401	6.18585	6.52731	6.17378	6.31462	5.49274
TSHZ3	7.46313	8.04741	8.09194	7.84089	8.1791	8.6656	7.77638	7.81943	8.10322	8.51632	6.76091	7.63381	7.68042	6.96427	7.34905	7.42455	7.19851	6.91801	7.24462	6.57254	7.42012	7.26149	7.24245	6.5464	7.31781	6.35632	7.69104	7.89923	6.49108	6.77558	7.74654	7.4048	7.5228	6.83661	7.05032	6.69599	7.27947	6.6971	5.52458	6.78837	7.29643	7.22361	6.91245	7.37579	7.10076	8.10058	7.0994	6.89427	6.63698
PUF60	9.37098	9.67641	9.55968	9.37574	10.1546	10.1481	9.91542	10.0186	10.4932	10.3044	12.2876	11.297	10.6385	12.3178	10.2378	11.9877	11.5803	11.7905	10.7069	11.667	10.9685	11.6595	10.5055	12.5413	10.6483	11.9293	10.8105	10.7426	11.716	11.0682	9.92493	10.744	11.0476	10.8914	10.9579	12.1766	12.0466	12.5333	11.2886	10.1413	10.3065	12.4366	10.6211	9.46727	9.6013	10.2194	11.1721	10.3785	10.3626
RUNX1T1	7.62138	7.62509	7.30845	7.51885	8.74405	8.77533	8.29449	8.67437	8.83974	8.37387	6.10875	6.94318	6.12312	6.5091	7.0858	6.36381	7.28299	7.66047	6.20144	6.81464	6.0528	6.05356	5.96499	6.4351	8.02537	5.96412	6.1913	7.3664	5.71331	6.4679	6.50108	7.14696	6.4179	7.96564	6.81673	6.21205	5.87048	6.01776	6.05859	6.04732	6.55401	7.49986	7.76431	6.39846	6.48344	7.24371	6.99434	7.47356	6.31961
FLJ11710	7.34765	7.58116	7.5079	7.54745	8.05622	7.91273	7.84066	7.66929	7.60338	7.84032	5.44653	5.47236	5.67283	5.91597	5.61771	5.72856	5.67414	5.85876	5.95412	6.03987	5.84031	5.95111	5.96504	5.87913	5.70714	6.12126	5.71149	5.54707	5.73743	5.95573	5.98803	6.02906	5.62643	5.95305	5.88216	6.20709	6.00676	6.03653	2.59848	5.75365	5.96841	5.93927	5.86283	5.96331	5.69188	5.47633	5.33475	5.6178	5.57017
CDC20	6.42227	6.08688	8.04432	6.24692	6.91841	6.26721	6.21413	6.6586	7.08038	6.40291	8.42328	9.28163	8.49306	8.30831	9.61662	9.1003	8.53823	9.98726	8.96972	9.66771	8.69777	8.07746	6.63246	10.2967	7.81594	9.28094	8.96725	8.63631	9.1202	9.56417	7.48197	7.93952	8.94488	7.03959	10.9627	10.2161	10.0426	10.9745	6.01808	9.50522	8.98634	8.87077	9.1522	7.63707	8.82401	8.15411	9.40904	8.76732	9.58451
LINC00691	5.28574	5.29281	5.39959	5.36253	5.19649	5.82147	5.82247	5.56011	5.35734	5.62895	3.90415	3.20131	4.02469	4.38668	3.66477	3.5447	2.54427	4.94866	3.96484	2.44326	3.11443	3.50124	3.93847	2.06193	3.53517	4.07504	3.50598	4.04035	2.61748	3.85672	3.6493	2.15126	4.00547	3.52299	2.36202	3.97315	3.76484	1.86003	0.664121	1.95783	2.95344	3.96538	3.77483	3.71382	4.02163	3.84335	4.07766	2.14076	4.08983
RP3-508I15.21	6.83917	6.43979	6.88889	7.28758	7.69787	8.18662	8.11766	8.61487	8.01184	7.75765	5.87317	6.35779	6.40773	5.71897	5.88009	5.4776	5.91504	5.98762	6.97161	6.61384	6.091	5.78314	5.71834	6.06664	6.04712	5.51719	5.70207	6.65652	5.69344	6.3544	6.54741	5.89941	5.88523	6.17934	6.97988	5.88113	5.75641	5.93695	5.33917	6.12284	5.97781	6.80235	6.23111	5.89327	6.57106	6.27887	6.48537	5.70534	6.8532
UFSP2	8.86043	9.29769	8.37525	8.57302	10.2977	10.1603	10.2181	10.1198	10.2934	10.1986	7.53228	6.71943	7.90813	7.15683	6.88558	7.99989	7.44804	7.79141	6.75946	7.7068	7.47011	7.22895	7.63096	7.83956	7.59346	7.42764	8.0817	5.98261	7.77996	7.04089	7.13462	6.95806	6.31173	6.84867	6.8138	6.8373	7.36328	7.65047	7.10613	7.46372	6.71935	7.61137	7.43249	6.93042	6.68603	6.02998	6.7235	7.31728	6.18697
HIST1H2AE	6.03763	5.80482	6.57458	5.64025	4.6803	5.06597	4.85411	5.10544	4.85035	4.87105	8.1942	7.09512	7.99418	7.7116	8.34179	7.05343	6.34055	8.44363	7.25978	7.31565	6.98777	6.33956	6.35964	8.79311	6.6662	7.39545	7.72106	7.48417	7.86644	6.88479	7.73857	8.28407	7.52936	9.67962	6.97344	7.37186	9.20966	6.27793	3.63744	7.0201	8.18891	8.0981	6.74187	6.71447	6.91162	7.83821	8.37874	7.00411	7.88191
PUS7	6.83749	7.08805	7.12698	7.24624	7.98855	8.01133	8.35684	8.32654	8.3888	7.31174	8.96861	9.33505	8.90505	8.77537	7.61961	8.53272	9.32902	8.29108	9.24273	9.70807	8.52527	9.2572	8.73952	8.49391	8.33076	9.70918	8.1151	8.17874	9.13459	8.78034	8.57004	8.736	8.727	8.71243	8.4881	9.36711	8.54837	8.57828	8.48902	8.93521	7.40888	9.29049	8.70635	8.00377	9.13883	7.74332	8.46071	8.19425	8.69003
C21orf62	8.02572	7.76911	7.71251	8.07132	7.54829	8.22413	8.14067	8.04322	7.56645	7.61128	7.41908	6.78509	7.56696	7.18386	7.04336	7.0173	6.85192	7.10527	7.30452	6.93861	7.18763	7.34738	7.00169	6.82136	7.04057	7.3446	7.4213	7.69525	6.9429	7.13969	7.43702	7.31326	7.28387	7.3109	7.14043	7.07177	7.13319	6.72122	4.84249	7.40745	7.37582	7.20314	7.19633	7.46817	7.24006	7.52627	7.24581	7.39275	7.38566
HIF3A	6.12488	5.89121	6.15695	5.98531	4.64668	4.32962	4.53227	4.54105	4.37076	4.58277	8.7233	8.41147	8.22947	8.46301	8.63433	8.42142	8.58414	8.60247	8.43649	8.37449	8.42576	8.55193	8.44839	8.42799	8.52007	8.48981	8.19908	8.59593	8.52995	8.36207	8.17385	8.52018	8.22929	8.41948	8.3655	8.41089	8.4312	8.45829	4.21956	8.37077	8.63902	8.13681	8.44067	8.23772	8.3535	8.31982	8.45536	8.34821	8.30037
EFNA5	9.51105	9.92119	9.06939	9.00724	9.66501	9.66262	9.93395	9.87154	9.55	9.6965	6.66798	8.643	7.25535	8.31864	7.48503	7.53866	9.66881	8.04028	7.76069	8.01987	8.32224	7.46023	8.53557	7.03028	7.87541	7.5936	6.5602	6.99764	6.30697	6.61699	8.02859	7.30228	7.49434	8.22052	6.90185	8.24123	9.01848	6.65586	7.57249	7.82599	7.54084	8.12973	6.90011	6.19852	6.47552	7.06457	7.10897	8.09687	6.31814
LOC101928554	6.66023	6.25448	8.12309	7.09426	4.37997	5.10583	4.956	4.15838	4.81714	4.03843	10.0375	9.67197	9.01973	8.73484	8.93745	9.27144	7.17589	10.3233	8.41437	8.03004	8.34093	9.12225	9.40849	7.79343	7.96706	6.84424	7.69591	10.8287	9.65716	8.27276	7.93299	8.6873	8.40943	7.66856	9.6969	9.34416	7.48033	10.8027	6.47513	9.1605	8.55745	5.13193	9.04378	8.82178	8.81694	8.40011	8.01405	8.34926	10.0627
RPS6KB2	6.86137	6.82836	6.74499	6.6891	7.39553	7.26544	7.33086	7.03646	7.15098	7.34851	9.18267	8.39966	8.08972	8.69038	7.68729	7.83838	8.53619	8.27573	8.47905	8.81686	7.98193	8.12759	7.19283	8.84996	8.74522	8.17417	8.46548	8.59168	8.01218	8.36948	7.96237	8.18381	8.39621	7.39505	8.24698	8.94532	8.4818	9.54515	6.92359	8.34511	7.88699	8.52744	7.57135	7.27128	7.7567	8.52053	8.59638	7.72699	8.25308
NEK4	6.55352	6.95512	6.79952	6.92307	7.26984	8.03236	7.09007	7.54642	7.5846	7.56349	9.05283	9.13042	8.74976	8.64031	9.03576	8.85893	8.08155	8.95521	8.8476	8.93832	9.15382	8.75219	8.93581	8.64992	8.68869	8.79881	8.94273	8.83138	8.8266	8.78465	9.10599	8.29106	8.64808	9.09173	8.74541	8.60656	8.82268	8.8487	6.45068	8.60222	8.45037	8.04408	8.6956	8.44834	8.83536	8.45907	8.52966	8.49129	8.97597
ME1	8.72693	7.76296	8.08437	7.65738	7.82912	8.49684	8.37266	7.37993	7.84677	8.45103	6.94451	7.34443	7.11677	6.97138	7.50617	7.72774	6.77179	6.83941	7.20317	6.12794	7.27823	7.58732	6.69024	6.87797	7.37147	6.58306	7.61409	7.22841	6.73559	7.31098	7.81204	7.13759	7.13397	6.97309	7.3609	7.25647	6.74937	7.19604	3.74654	7.05819	7.48427	7.82623	7.51063	7.68712	7.62681	7.59325	7.19819	7.56703	7.34961
MTHFD2	8.60777	7.19253	7.73556	7.63576	9.06944	8.03986	8.35502	7.81318	8.74963	7.02416	10.615	10.068	9.00146	10.8231	10.2339	9.19357	10.9351	10.7149	9.38851	11.765	9.10856	9.41141	9.10251	11.5912	9.46295	10.3087	9.87176	8.79691	9.67	9.27542	8.21424	9.51352	8.83593	8.41363	9.72441	11.1981	11.2712	11.6224	10.1592	9.55212	9.62684	9.70832	9.66682	8.89785	8.78212	8.48241	9.50493	9.07434	9.20433
ZNF542P	9.75342	10.7398	10.1746	9.96371	7.24118	7.29995	7.36967	7.67499	7.24176	7.7516	6.7664	6.52837	5.64031	6.23714	6.34014	5.85964	6.48331	6.16079	6.0206	7.21965	6.954	6.12367	6.36192	6.77634	6.92079	7.51528	6.21179	6.21322	7.26819	7.17947	6.72869	6.68405	6.33454	6.02457	6.34714	6.73793	6.92631	6.11281	5.73113	6.5027	6.45441	6.60961	5.48173	6.29982	6.84117	5.85245	6.79125	6.3282	6.477
DISP1	7.54021	7.74168	7.34133	8.01636	10.353	10.0513	10.2801	10.4141	8.57693	9.03112	6.98192	6.57241	6.81593	6.8464	7.04317	7.64317	6.43336	6.52924	6.5879	6.08748	6.82209	6.7533	6.6264	6.6985	7.03953	7.30735	6.95831	7.02605	6.76988	6.70332	6.93956	7.11977	6.34883	7.72613	6.51768	7.59488	7.82741	6.45002	4.76939	6.14005	7.24408	7.07568	6.55988	5.18713	6.64285	6.39197	7.16511	7.40231	6.60539
ETNPPL	4.22559	4.35432	4.857	5.6502	5.18416	4.72031	7.26227	7.61861	6.21815	5.50857	4.878	4.01841	5.16621	4.06054	4.37925	4.03708	3.61781	3.86038	3.96075	3.57333	4.33531	4.20806	3.50455	2.92902	3.51225	4.08035	4.50378	4.02664	4.03038	4.25904	3.59727	3.40265	3.02189	4.38111	3.8076	4.23699	4.33976	3.86126	5.98325	3.89395	3.37678	3.37255	3.69286	3.92403	3.9575	3.63797	4.06772	3.27569	3.67529
ETV6	8.69804	9.23696	8.51849	8.55626	7.24007	6.4173	6.67403	7.06312	6.586	6.78962	9.13773	8.6471	8.56092	8.11684	8.31497	8.57823	8.84344	8.51751	9.06277	8.2951	8.42591	8.68513	8.62464	8.44878	8.63598	8.66687	8.49424	9.14326	8.52196	8.49645	8.66865	9.19833	8.49851	8.41754	8.56526	8.74661	8.41544	8.6986	7.00646	8.97937	8.28543	8.17331	8.67672	8.57644	8.7314	9.03693	8.63394	8.6771	8.94153
CD180	8.46184	6.68861	7.05801	6.62056	8.40568	6.88359	7.74886	6.76631	7.40836	6.73931	6.23495	6.19797	5.39506	6.29307	6.34388	6.02456	5.71239	5.7	5.89469	5.6863	5.54261	5.97046	5.32244	5.45358	5.95094	5.35889	5.64921	6.75427	5.87549	5.3193	5.83761	5.51535	5.3761	4.76346	5.49665	5.19133	5.15373	5.21632	3.5481	5.34743	5.34889	6.05216	6.05094	5.86219	6.38529	5.53039	5.89136	5.7085	5.11011
SLC25A10	5.83884	5.80074	5.99447	5.67817	5.65387	5.90689	5.85804	5.93441	6.0844	6.21913	7.48407	6.94121	7.0415	7.55011	6.76902	7.05372	6.72218	7.10499	6.5716	7.5006	6.56913	6.63125	6.13925	7.63004	6.8053	6.80081	6.96428	6.61416	6.63725	7.3046	7.28578	6.82322	6.97327	6.35007	7.4293	7.65073	7.27658	7.77714	5.75641	6.93836	6.31965	6.56532	6.62133	6.87317	6.72972	7.16396	6.86049	5.92922	6.94569
ATP5SL	7.99382	8.50809	8.10943	8.08838	7.76358	7.75452	7.75175	7.66536	7.97994	7.86066	9.60125	9.20797	8.90544	9.32861	9.22036	9.0968	9.61572	9.33044	9.03452	9.57985	9.12772	9.3818	9.29785	9.52338	9.29332	9.70085	9.01277	9.20252	9.44441	9.10214	8.8245	9.46488	8.93262	9.00606	9.06989	9.43034	9.41838	9.99858	6.06882	9.40298	9.62858	8.80608	9.38917	8.92714	9.05503	9.30354	9.11967	9.16961	8.96114
KIF14	6.25988	4.2884	5.97356	4.3533	5.01724	4.21965	4.82848	5.28752	5.48877	4.12047	7.30916	8.10585	6.47219	5.29874	7.68847	7.91292	7.27646	6.84434	7.24774	8.76233	8.32573	7.14076	5.64284	8.2304	6.59621	8.93208	6.79069	6.71543	7.32017	8.04163	5.37424	6.73364	7.37221	5.179	7.56272	8.3707	8.33578	7.11495	6.21048	6.46186	6.60084	6.58814	7.27546	5.36638	7.19431	5.90962	7.98841	7.01697	8.45157
ASS1	9.44934	9.79758	9.85907	9.92865	10.2983	10.4297	10.7785	10.8786	11.2441	11.2111	12.8247	12.347	10.8958	12.6533	12.3236	12.0566	13.2167	12.2598	11.617	13.4608	10.9732	11.3298	11.7707	12.6895	11.2419	11.612	10.8899	12.0999	11.8098	12.1233	10.6032	11.5833	11.0046	10.944	12.4649	12.224	11.938	13.4213	12.6623	12.5519	12.4354	11.7736	11.222	10.2541	10.8211	10.4528	11.8905	10.8319	10.6372
LCN2	7.01915	7.01156	9.43802	6.95877	7.7385	6.25671	6.44761	7.05093	6.53224	6.50516	10.543	10.7393	9.31504	7.33328	12.4227	8.91097	11.4524	9.00709	9.25383	7.35288	8.00815	9.57184	10.7058	8.89601	9.61898	6.91655	8.44109	8.28896	8.15474	10.3136	10.4465	7.67643	8.83624	7.8026	9.50809	13.1839	7.81704	8.17515	8.83595	10.3496	10.4484	11.8221	9.25609	9.32802	7.89845	8.82807	10.3871	7.98124	7.75143
KIF20A	6.96999	5.03498	7.15317	5.47736	6.56173	5.634	6.62102	7.02067	7.67337	5.61054	8.62604	9.04746	7.9016	8.64536	9.74382	8.67921	9.87142	9.91016	8.39262	9.92219	8.6863	7.52156	6.15351	9.01735	8.59727	9.0605	8.8206	8.81793	7.41491	9.41052	7.80345	8.19515	8.79619	7.79161	9.6156	9.36881	10.4425	10.3138	6.27957	9.18136	8.491	9.50807	8.7722	6.45633	8.67048	7.80371	8.81402	8.91316	8.90873
KIF11	6.57679	4.27488	6.76566	4.32757	5.84686	5.9223	6.33647	6.09624	6.28127	5.15209	8.09804	8.23162	7.71492	7.401	9.2834	8.61745	8.96322	8.46714	8.10093	9.51825	8.5232	7.63583	6.04312	8.96141	7.05739	9.82665	8.82376	7.58022	7.68692	7.67339	6.68987	6.90206	8.78531	6.94782	8.49429	9.02191	9.38207	7.97168	6.66071	7.73518	7.64145	6.94737	7.8173	5.22978	7.5979	6.11706	7.33872	7.30031	8.54945
CLDN7	7.88759	7.83282	8.30668	8.39639	6.92281	7.10325	7.48343	6.62313	8.09532	7.69141	8.97719	8.88429	8.50837	8.77929	9.20425	9.15277	10.0777	9.18868	8.99827	9.36076	8.77358	8.92993	8.68026	9.96982	8.75433	9.76356	8.65175	8.57169	9.38362	8.99682	8.1671	8.58734	8.72454	8.61771	8.78053	9.74292	9.62553	10.1397	8.24571	9.34527	9.00028	9.29026	9.66047	8.39918	8.46347	8.48324	9.01835	8.40676	8.63153
PSRC1	6.32459	5.65609	6.55496	6.03878	5.84542	5.8174	5.8515	5.98242	6.01111	5.46628	7.18921	7.42261	7.02693	7.48845	7.7574	7.61033	7.00314	8.35088	7.29142	8.72372	7.72601	7.19995	6.77318	8.05231	7.02712	8.14711	7.2944	7.50162	7.78254	7.99099	7.74759	7.36294	7.54062	7.18003	8.4147	7.13504	8.67285	7.46455	5.9866	7.51004	7.66148	7.04563	8.19376	7.14869	7.84194	7.09236	8.18068	7.92485	8.30138
GOLGA6L2	6.70242	6.92297	6.81485	6.69288	6.71685	6.18431	6.29521	6.55206	6.43163	6.53974	3.95491	3.6251	3.82887	4.23229	4.56174	3.45739	4.06045	4.35623	4.04042	3.22951	3.91678	3.78659	3.74541	3.41591	3.83588	3.59926	4.07826	3.98584	3.68996	3.72894	3.69852	4.12877	4.36492	4.31793	3.50643	3.35656	4.09031	3.69588	5.29453	3.47602	4.25948	3.47371	3.63907	3.43895	3.47997	4.19535	5.30059	4.0715	4.36247
PROM2	8.01566	8.30583	8.11739	7.71054	6.39739	5.7931	5.89752	6.45498	6.0209	6.18316	8.71345	8.90136	8.21939	7.84204	8.57137	8.36495	9.93441	8.29142	8.1042	8.15064	7.9861	8.16217	9.18417	8.07668	8.28569	8.38576	8.25456	8.35936	8.58471	8.38269	8.0969	7.86243	8.26879	8.37225	8.54447	9.50302	7.97366	8.57408	7.87404	8.44607	8.28315	8.90612	8.29784	8.33968	8.30232	8.76406	8.87651	8.33249	8.58719
ZHX2	7.80446	8.68235	7.80462	7.7888	8.07844	8.10572	7.66356	7.53612	7.5502	8.25666	10.5757	10.2371	9.887	10.281	10.3775	10.2304	10.2646	10.3743	10.0308	10.3797	10.0445	10.1163	9.99011	10.4629	10.1045	10.0381	9.82792	10.5733	10.3446	10.2517	9.8937	10.037	9.96247	10.1156	10.1529	10.0927	10.3052	10.5728	4.19306	9.94953	10.0355	9.93459	9.87145	9.69915	10.0848	9.75417	10.1242	10.1215	9.87485
ESM1	3.79325	3.33841	3.15774	3.12417	2.90796	2.97397	2.1258	2.08172	2.97799	2.60013	7.15607	5.56278	7.22981	7.12748	6.48761	7.00906	8.79701	7.05839	5.04107	8.0138	5.54054	4.34869	4.22452	7.95816	8.13949	7.62892	4.92835	6.84108	7.9932	8.05939	6.28109	5.23381	6.30483	7.28643	7.71623	6.34654	5.17308	5.13611	4.83473	4.31765	8.07063	7.02864	7.67578	7.95046	5.30779	6.11974	8.21598	6.49755	6.56484
KBTBD11	6.06471	6.51093	6.61767	7.23175	6.4582	7.32423	5.63916	6.8876	8.01248	8.17057	5.26063	5.32899	6.55111	5.25476	5.95037	5.77437	5.38055	5.06422	5.60949	5.24481	5.97343	5.63568	6.76901	5.27265	5.62721	4.93533	5.60211	5.54269	6.08807	5.89378	5.09028	5.42668	5.82015	6.04986	5.28653	5.42656	5.105	5.13025	4.01299	4.982	5.97312	5.5115	5.34958	5.72337	5.06448	7.15016	6.04287	5.01339	5.54651
SOCS2	5.66482	6.60361	6.3815	6.99382	6.45274	6.62464	6.71095	6.22959	6.42881	6.0032	4.89319	4.92629	5.28727	4.93933	4.7893	4.794	5.32223	4.70321	4.77066	4.80077	5.269	4.90271	4.69377	5.39174	5.56296	5.21526	5.23348	5.42263	4.6497	5.19099	5.17455	5.22959	6.17987	4.85874	5.51591	4.73909	5.57594	4.57732	3.4111	5.03026	5.33917	5.66207	4.92902	5.82	5.01856	5.76842	5.52707	5.63811	4.54778
DTL	5.2507	4.5981	5.7822	4.54133	4.91869	4.68389	5.15394	5.09176	5.92786	4.96974	6.8862	7.6736	6.88189	6.47016	7.23839	6.84272	6.66851	7.63116	7.01571	6.94673	7.14249	6.39229	6.16104	8.00556	5.75715	8.48742	6.83873	6.6067	7.54983	7.35782	5.28328	7.41357	6.89483	5.72735	6.36678	7.01008	7.98061	6.63915	5.36927	6.51743	6.8203	6.24409	6.51957	5.33237	6.41729	6.44309	6.28765	6.61149	7.4773
ADAMTS3	6.46633	6.68383	7.27334	7.70506	9.39853	8.64815	9.5183	9.36819	8.13256	7.68286	5.71243	6.03158	5.27048	5.03085	4.9601	5.0981	4.88699	5.12769	5.10707	5.83159	5.08342	4.93747	5.75965	5.00851	5.46871	7.26629	4.59092	4.81278	4.97387	4.63908	4.89999	5.44737	6.1222	6.43575	4.76292	6.08725	7.92183	4.41515	2.96927	4.8895	4.95284	5.79105	6.0213	4.84252	5.40008	5.87417	5.99312	6.05239	4.74721
PITPNM1	5.88347	6.16021	6.43514	6.56579	7.15281	6.52535	6.90346	6.6704	6.60833	6.62895	8.21607	7.55016	7.36546	8.61696	7.39788	7.01718	7.41255	7.54083	7.50826	7.71275	7.48542	7.04818	8.03576	7.57829	7.69846	7.80072	7.08654	8.87936	6.9678	7.92851	7.11038	7.15983	8.11787	7.05161	7.18217	7.78517	7.71609	8.10818	6.92837	7.50537	6.70173	8.83636	7.31559	6.99677	7.49353	7.39999	7.34519	7.49123	8.41902
BCAR3	10.616	11.6331	11.196	11.0468	8.90843	8.17188	8.21861	9.14554	8.35967	8.60635	7.88833	7.81407	7.7984	7.76193	6.66066	6.84241	6.94979	6.59672	7.23135	6.45383	7.13584	7.26666	6.41136	6.02749	6.9809	5.96091	7.59029	7.84337	7.71281	6.57646	7.4627	6.74455	7.10554	7.33116	7.14518	7.00667	6.54644	6.3458	5.36656	6.12852	5.91727	7.51242	6.66233	7.2035	7.54072	7.35083	7.23672	7.45848	7.21862
EIF4G1	6.9613	6.87059	7.32559	7.059	7.36294	7.1019	7.13612	7.37722	7.64877	7.4993	8.94989	8.74989	8.43247	9.10636	8.97245	8.64431	9.16577	8.52385	8.61728	9.66243	8.32452	8.07728	8.2373	8.85089	8.25932	9.12762	8.45278	8.35654	8.70559	8.50783	8.28337	8.47445	8.34126	8.28989	8.43596	8.96814	8.39545	9.7082	7.52781	8.1625	7.88432	9.07289	8.39747	8.06238	8.31942	7.46338	8.38376	8.58153	8.16317
DOCK5	8.16952	7.69105	8.06391	8.2756	7.75011	8.55833	8.06859	8.10627	8.38687	8.54801	7.20909	7.30395	7.61628	6.37519	7.52177	7.51421	7.18038	7.37035	7.40916	6.34247	7.2169	7.39041	7.59889	6.62661	7.18849	6.65166	7.7643	7.49928	6.85116	7.30279	7.8538	7.63345	7.48411	7.42912	7.16495	7.2288	6.78534	6.61637	6.12661	7.19976	7.58469	7.20139	7.25004	7.5195	7.58143	7.51204	7.42916	7.74643	7.71333
LOC102724537	8.0826	7.81028	8.50591	7.86887	6.16235	6.00267	6.01949	6.31902	6.04412	5.76838	5.48718	5.42775	5.11943	5.15219	5.27453	4.7547	5.45335	5.24297	5.56472	5.29095	6.03559	4.98459	5.66875	4.88275	4.82829	4.72746	5.02055	5.51804	6.08826	5.20147	5.54167	5.07467	4.25265	6.0392	4.80945	5.19842	4.9533	5.1894	5.48593	5.65872	5.88446	4.58133	4.27375	5.13117	4.11943	4.69925	5.39985	4.742	5.52545
IDO1	6.09303	7.79985	6.86406	6.09722	6.31641	7.10126	5.61737	5.6586	5.37765	5.50521	9.51226	9.61509	8.89251	6.93768	9.02618	8.79543	9.07148	8.99055	9.15454	7.52023	9.28881	9.06083	8.77168	8.65058	8.97979	8.70145	9.22814	8.94845	8.77699	9.01493	9.46132	9.13441	9.28443	9.09332	9.1085	8.27748	8.99763	8.45403	6.25299	9.17169	9.15571	8.68938	9.08786	8.94816	8.94216	9.03029	9.09333	9.57605	8.99074
MYB	5.91471	5.58753	6.33526	5.80666	5.91373	7.10627	5.78443	5.47816	6.27393	5.84368	9.13651	8.65869	7.56382	8.40919	6.62751	8.08133	6.48662	6.35429	7.18448	8.99493	6.93757	8.00062	9.25397	9.47547	7.56601	8.18287	7.72316	6.92358	7.6019	7.92454	6.98312	7.53618	7.07522	5.8344	8.90602	8.38607	6.15063	9.34077	6.65142	8.98926	7.90782	5.36352	8.08645	5.46888	8.09738	6.66498	6.88963	7.20777	7.92554
LOC100996583	4.66562	4.70052	5.08069	4.62272	3.86382	4.63152	4.07502	3.86612	4.77545	4.41645	5.94414	5.84743	6.21392	6.22032	6.33363	5.75839	5.7238	6.40425	6.17743	6.31523	6.00061	6.28357	6.13471	5.87085	6.32401	5.80766	6.23779	6.26183	6.03376	6.63378	5.95979	5.90647	6.22182	6.2251	5.95234	5.72031	6.16506	6.13482	2.83856	6.4462	6.15653	6.37452	6.26355	6.63774	6.37815	6.57493	6.08892	5.98992	6.33471
SRD5A1	7.27623	7.56118	7.3994	7.11047	7.45473	7.39092	7.7521	7.4267	7.52319	7.2965	9.05084	7.82031	7.94647	8.50271	8.59552	8.59253	8.4407	8.57672	8.18124	9.49352	8.54877	8.76123	8.44981	9.58437	8.74696	8.46788	8.78567	7.1633	9.78526	8.60383	7.81608	8.71722	8.85784	8.0454	8.65026	9.74681	8.72004	8.30993	8.48981	7.82808	8.36873	9.34194	8.27971	8.44053	7.78164	8.00419	8.229	7.69529	7.72181
GTPBP3	6.57193	6.78182	6.80543	6.7288	6.73231	6.72908	6.79054	6.63618	6.4218	6.71919	7.73674	7.68683	7.62984	9.04274	8.10821	7.85242	8.10255	8.17549	7.78876	8.36552	7.99699	8.03906	7.52943	7.81583	7.62687	7.91765	7.73853	7.36374	8.24164	8.08957	7.613	7.56	7.74219	7.86111	7.84914	8.00051	8.76382	8.68296	7.26705	7.75965	7.39313	7.79975	7.80872	7.27057	7.79931	7.15351	7.26925	7.39473	7.8279
SNCAIP	7.31874	7.19557	7.47475	7.43091	8.25655	8.00603	9.02983	8.89163	7.65313	7.18283	6.37342	6.49564	7.20131	6.56809	6.67474	7.03232	6.21202	6.53745	6.8535	6.67645	6.58082	6.66346	6.7279	6.5278	6.86518	6.57545	7.33358	7.07865	6.61302	6.76309	7.30097	7.25892	7.10765	6.80989	7.03473	6.6566	6.68169	6.48038	3.92531	7.09095	7.20436	6.49069	6.87565	6.98597	6.93967	7.8011	6.93088	7.14755	7.0236
UBE2D1	6.74093	6.30831	6.05044	6.20745	7.22148	6.89007	7.37641	7.20364	7.15349	6.56946	9.23011	9.46642	9.46969	8.46197	9.36897	9.54745	9.25492	9.246	9.42561	9.09562	9.44109	9.35031	9.29655	9.44878	9.38813	9.3624	9.45398	9.48411	9.28048	9.37647	9.49241	9.06789	9.46377	9.48632	9.28658	9.21548	9.31772	9.15425	5.39298	9.20929	9.11993	8.17686	9.48329	9.377	9.36126	9.54656	9.46005	9.3463	9.46076
FER	7.81071	7.16321	7.29834	7.6519	7.77847	8.28423	8.093	8.49202	8.21503	8.22229	6.3907	6.53032	6.5741	7.34022	6.28431	6.46298	7.64107	6.63737	6.47805	7.44423	6.9726	7.20226	6.6595	6.80305	6.99214	7.33439	6.9346	6.33513	6.56948	6.61969	7.03232	6.80858	6.68392	7.56364	6.87116	6.88675	6.8953	6.77188	5.18732	6.47742	6.89552	7.20823	6.77897	6.89655	6.94834	6.64999	6.57635	6.78228	6.46933
RALY	8.31857	7.95302	7.76701	7.90519	8.06375	8.0946	8.17246	8.10609	8.52578	8.50462	9.55789	8.72893	8.64282	9.05478	8.73	8.66831	9.15878	8.82344	8.91157	10.2186	8.983	9.24879	8.54086	8.83076	8.7585	9.73642	8.9852	8.6586	9.03544	8.95789	8.39221	8.5167	9.21883	8.67478	8.71256	9.04694	9.40765	9.52083	8.04452	8.78805	8.77448	9.17965	8.67262	8.66387	8.61473	8.00315	9.06474	8.74095	8.69197
TMEM212	4.83548	4.8013	4.85281	4.85526	4.5689	5.11133	5.09054	4.88071	4.64516	4.93791	7.86125	7.61838	7.20272	8.26646	8.22086	7.18823	8.94397	8.51689	7.48131	9.32331	8.11378	7.45022	7.91341	7.90923	7.16016	7.9601	6.58093	8.10153	8.34182	8.19666	7.52281	8.26006	7.8288	8.36116	8.04518	8.60048	8.69192	9.31858	1.59368	8.1425	9.65842	10.0865	8.25559	7.05345	7.3445	7.33317	8.24388	7.80567	8.07713
SCNN1A	10.3901	10.8645	10.9515	10.579	7.87428	8.03313	8.18054	8.471	8.76842	8.83866	10.5788	10.5364	10.4119	10.4844	10.0151	10.2192	10.4831	9.93041	10.7492	10.5341	10.0993	10.5856	10.207	11.2089	10.7493	10.7939	10.2967	10.7307	10.6598	10.1136	10.2329	10.1505	10.1025	9.95148	10.5119	11.2479	9.75555	11.2056	9.1053	10.6957	9.77181	9.18923	10.0494	9.97237	9.93888	9.68879	9.56223	9.97448	10.1833
BCL9L	8.57585	9.28652	8.76876	8.56462	7.38317	7.06546	7.01738	7.59719	7.69863	7.48291	9.87095	10.1654	10.0548	9.03302	10.0073	10.1745	10.2877	9.9528	10.1378	9.99342	10.1042	10.117	10.299	10.1524	10.1921	10.1658	10.1363	9.90987	10.1847	10.2773	10.1998	10.2715	10.1889	10.2305	10.268	10.4228	10.0995	10.0211	7.45504	10.2136	10.1507	8.79164	10.1854	10.1439	10.0928	10.2083	10.1847	10.1116	10.2328
RP5-1102E8.3	6.99901	6.86726	6.7082	6.72731	5.90465	5.81943	6.03994	6.31363	5.83105	6.03969	3.38873	4.0716	4.47568	3.78267	4.14276	3.64729	3.56382	4.1188	4.9256	3.97989	4.5385	3.17523	4.75978	3.54532	3.95004	4.29001	4.24682	3.81082	4.23004	4.31099	4.15212	3.63668	5.06765	4.9905	4.23057	3.77893	4.49669	3.78959	7.09993	3.78125	4.53935	3.2042	4.11798	4.3003	4.44165	5.02924	4.35011	5.35501	4.90693
HTR2B	8.27801	7.33874	8.08828	7.68088	5.84364	6.193	6.96662	6.01844	6.0789	5.83362	4.71169	4.90826	4.91257	4.75326	4.70684	5.59767	5.33895	4.31699	4.73511	5.01607	4.42908	4.23218	4.83309	4.83875	5.12461	4.30839	4.77696	6.25413	4.77188	4.93695	4.29094	4.5387	5.23344	5.08035	4.99537	4.48651	4.55965	5.32644	3.40482	4.90383	5.58053	5.09909	5.13484	5.36369	5.19892	5.20831	5.25663	5.77434	4.84849
UCP2	9.70506	8.59222	9.21694	8.70113	10.2738	9.31436	9.62787	8.45484	8.48882	8.59049	11.378	9.38886	10.0218	11.2513	10.4567	9.91218	11.3754	11.4958	10.7628	10.8848	10.0262	10.7337	9.46215	12.0377	10.5721	10.1005	9.44644	11.8209	10.7309	10.6776	9.69889	9.9631	9.91297	8.78511	10.0996	10.5703	10.6474	11.6535	9.40964	11.5895	9.97052	11.9122	10.4667	8.99869	9.73901	9.28046	10.3497	9.84996	9.94715
S100A14	7.24475	7.28454	8.12254	7.6371	7.46682	7.95509	8.25122	7.13855	8.39596	9.6392	10.0063	10.0846	9.80604	11.2092	10.9914	10.1632	11.9244	9.29982	10.2279	8.14423	7.98744	9.59358	9.85019	11.4001	11.2538	9.86835	9.86793	8.37587	10.9768	9.34301	9.34335	8.51392	8.28794	9.58757	9.1473	10.4829	8.99541	12.5714	11.8858	11.1586	8.51258	9.78988	9.1666	9.29224	8.83076	8.87124	10.7698	9.09645	7.56508
RFXANK	6.96534	7.31904	7.30663	7.01957	7.84308	7.74561	7.93234	7.89309	8.06869	8.26626	9.04411	8.9061	8.53129	9.23893	8.42673	8.76159	8.12653	9.0464	8.86898	8.36996	8.66686	9.26138	8.50588	8.99058	7.37021	8.87218	8.99649	8.34862	9.95963	9.72668	8.05923	8.34329	8.85434	8.22596	9.16649	9.33528	8.79512	8.70198	7.9005	8.68186	8.29225	8.48141	8.16777	7.79017	9.07793	8.10359	8.73349	8.49162	9.09149
JAG2	8.31369	8.87608	8.41974	8.30552	7.2075	7.06006	7.02847	6.94941	6.86602	7.21154	8.30933	8.80973	8.76373	8.64337	8.39881	8.0734	9.65707	8.80224	8.75172	8.96918	8.93613	9.1906	8.92115	8.60446	9.13429	8.78993	8.77421	9.093	8.87541	9.19953	8.51512	8.77729	9.12643	8.51615	8.30759	8.50472	8.34057	8.86214	7.82856	8.90257	8.4096	8.95703	8.54482	8.69235	8.56877	8.55782	8.88212	8.92006	8.54261
LOC401324	7.73641	7.41672	7.85795	7.48045	6.11501	5.45679	5.63139	6.20407	5.59044	5.96112	4.82984	4.57356	5.38678	4.59822	4.65704	4.94894	5.00134	5.32031	5.39159	5.37993	4.83727	4.95718	5.13945	4.94933	4.69031	4.86818	5.36398	5.28853	5.27155	4.32799	4.67377	5.11857	6.42679	5.65356	4.86646	4.82592	4.78277	4.8019	2.48687	5.20526	5.2198	4.99694	4.78829	4.56852	4.94942	4.74714	4.85234	4.78864	5.05833
SLC7A1	7.27301	7.6668	7.86183	7.74884	7.82023	7.85541	7.63893	7.49567	8.17094	8.00219	9.04574	8.27591	7.97249	9.06832	8.91877	8.61193	9.35998	8.70977	9.00493	9.5788	8.05162	8.78155	8.66025	9.21641	8.31596	9.03443	8.65226	8.23221	8.6402	8.36406	8.00287	8.41935	8.36797	8.97768	8.04362	9.60949	8.99752	9.66424	8.3728	8.05999	8.02341	9.52745	8.19118	8.34009	8.02032	8.12391	8.10943	8.09832	8.25742
SMC4	7.61141	7.11923	7.85136	7.80168	8.04288	7.96383	8.60514	8.54451	7.89015	7.39284	9.66872	9.94123	8.56524	9.20375	9.60361	8.95414	9.6309	9.73375	9.13764	10.2464	9.01955	8.49647	8.9135	9.76221	8.54201	9.8654	8.73606	8.54371	9.0209	9.20475	8.07869	8.66801	8.70018	8.48277	9.23297	9.92084	10.1813	10.6263	8.57468	8.9006	9.26814	9.89836	8.97501	8.03913	8.63424	8.07766	9.051	9.31017	8.73395
PRR32	7.4075	7.54377	7.81653	7.48864	7.10912	7.08154	6.99093	6.51327	5.58759	6.72184	4.91263	5.34056	5.51309	5.40866	5.19901	5.19849	5.4492	4.98012	5.28573	4.73922	5.20477	5.25825	5.50074	5.41904	5.21927	5.13974	5.09058	5.41207	5.33549	5.15214	5.39968	5.16583	5.12047	4.8698	5.50054	5.49456	5.41791	5.26377	3.21738	5.70711	5.72456	4.7141	5.08167	5.8215	5.40492	6.82849	6.45684	5.30778	5.6005
ATP6V0E2	9.83094	10.5251	9.98362	9.88223	7.76997	7.24797	7.13249	7.55373	7.45415	7.45796	9.84481	10.1901	10.2771	8.69577	10.1812	10.2822	10.5294	10.4186	10.1031	9.46788	10.0481	10.1719	10.2977	9.96818	9.86565	10.1528	10.3333	9.91689	10.2666	10.1915	10.0795	9.94096	10.2266	10.5308	10.2258	10.4936	10.5943	9.55054	8.95599	10.0495	10.0022	8.19347	9.92378	9.89088	9.93617	10.0983	10.0988	10.1987	10.011
GPRC5C	8.01198	8.31224	8.64363	8.45029	7.33054	7.37926	7.5143	7.3168	7.31354	7.58643	8.54487	8.75385	8.50785	9.88012	8.84777	8.93365	9.31206	9.49058	8.94048	8.71842	8.85964	8.64734	8.89222	9.70624	8.42784	9.19158	8.8949	8.86773	8.73045	8.79417	9.07553	8.70712	8.95164	8.42789	8.83813	9.88206	8.38672	10.0689	7.17948	9.16975	8.55083	8.9898	9.00452	8.7605	8.58177	9.16324	8.9071	8.83402	8.97187
ATP5E	9.80021	10.5389	9.27243	9.4834	10.9714	10.7564	10.8835	10.8792	10.8836	10.714	11.8284	11.2886	10.8563	11.6385	11.3775	11.352	11.729	11.5592	11.1882	12.2082	11.3217	11.3676	11.2899	11.778	11.283	11.6661	10.9426	11.3372	11.4754	11.2674	10.547	11.3201	10.8071	10.989	11.0685	11.846	11.9456	12.0884	11.3104	11.1242	11.1334	11.95	10.8858	10.3351	10.7203	10.2586	11.0258	10.729	10.4704
EZH2	7.1508	6.16128	7.30303	6.12177	5.96656	6.57028	6.54145	6.75357	6.94709	5.78637	7.66939	7.79996	7.84041	7.54766	9.00653	7.41113	9.26882	9.09107	9.32055	9.04808	8.80904	7.65098	7.5165	8.44612	7.63001	9.20052	9.0048	7.49088	7.65695	8.31039	7.50071	7.99286	7.48545	8.00668	7.95894	8.16821	9.68807	7.49751	7.2434	7.44078	7.80977	8.14287	7.31054	6.46287	7.20888	7.48929	8.37978	7.95438	8.1859
LSAMP	6.91996	7.04957	7.23518	7.16241	7.20206	7.09349	7.42114	7.37284	6.67502	6.96532	6.32137	6.52754	6.97897	6.25853	6.67755	6.75039	6.35758	6.75163	6.7656	6.07047	6.89089	6.65676	6.62518	6.68592	7.11453	5.9981	7.23464	6.82402	6.12742	6.70136	6.97623	6.79312	7.07222	6.77997	6.84225	6.43492	6.46046	6.21926	4.57107	6.50024	6.66076	6.09932	6.63958	6.98324	6.81549	7.21143	6.45248	7.05288	6.84959
EYA2	5.9923	5.69171	6.79287	5.8955	5.85776	6.41216	5.80229	6.18883	7.5217	7.74728	11.141	10.2629	8.40672	10.2784	8.58836	10.0753	10.2964	7.10586	8.53609	11.7108	9.83985	11.5292	9.19936	11.53	7.93711	9.05462	9.16296	9.28523	11.4898	8.82623	8.31767	10.0597	9.73226	6.02195	9.55296	10.9518	7.11218	11.7586	10.8988	7.01036	8.28838	11.3042	9.95785	8.07251	9.24197	7.5933	10.1621	9.03008	9.77084
XPR1	7.96678	7.94407	8.6643	8.20488	8.16308	8.38512	8.12195	8.15169	8.4325	8.40741	9.99296	9.47947	8.7712	9.11544	8.95706	10.2813	9.09367	8.76732	9.07547	11.0084	8.96856	9.37206	8.84581	10.8379	8.94323	10.0942	9.35616	8.95808	9.76108	8.92572	8.81395	8.95539	9.16216	8.63826	8.84053	10.1256	9.66766	11.1298	8.7776	8.65793	8.69446	9.9245	9.8187	8.83789	8.90588	9.10608	9.07988	9.28004	9.2434
CORO2A	7.17911	7.19148	7.47787	7.09946	5.93773	5.92059	4.87615	5.55698	6.481	5.07665	7.27139	7.51851	7.69665	7.00505	7.50044	7.47781	7.74088	7.10636	8.1371	7.45734	6.91063	7.14749	7.54489	7.55651	7.55846	6.88668	7.54443	7.61893	6.88362	7.84651	8.31917	7.37785	7.88416	7.45048	7.27142	8.00558	6.7519	7.55087	6.50061	7.81015	7.68208	6.60973	7.5204	7.81464	7.94658	7.99908	7.62729	7.05239	7.52389
ATP5G1	11.0524	11.2449	10.4203	10.2279	9.75577	9.01459	9.34977	9.55283	9.12767	9.34133	11.7176	11.2537	11.0921	11.8285	11.358	10.833	10.6833	11.5623	10.8877	11.6647	11.1911	10.9348	11.0198	11.0327	10.9624	11.2367	10.8081	11.6643	10.6204	10.7684	10.9925	11.0005	10.4931	10.9165	10.6159	11.2029	10.8126	11.8291	9.29756	10.2572	10.9052	11.3175	11.0593	10.3438	10.6964	10.2041	11.1096	10.3694	10.765
FAM171A1	7.64125	8.00146	8.11739	7.76089	7.81052	8.81774	8.13546	7.93769	9.01591	8.8368	10.5184	9.91434	9.60824	8.57588	8.56941	9.52434	9.09333	8.75083	9.27286	11.2103	10.0946	10.1047	9.3339	10.4009	8.97305	10.6512	9.32786	8.78036	10.1141	9.56822	9.09315	9.2732	9.45609	9.3562	9.31055	8.99837	9.88375	9.78793	9.39392	8.40027	7.91589	10.3156	9.52678	9.16008	9.30543	8.16639	9.65174	9.74342	9.76413
INHBB	5.27715	5.23947	7.32345	6.02172	5.67772	5.8585	4.97359	5.51419	8.47745	5.97426	8.36397	7.71372	9.1191	8.49741	8.24187	9.28431	11.3805	9.04957	8.60282	8.99588	9.38379	11.5321	9.62591	7.1977	8.33254	7.38752	8.98249	9.15108	9.56142	7.97521	8.20188	9.35559	9.03162	5.71854	9.38193	9.86125	5.47234	9.96511	8.84899	7.05154	7.19538	10.9301	8.57179	7.33977	8.72036	7.16999	8.10742	7.85698	9.92125
RGS4	8.20417	8.46701	8.26439	9.45623	8.03457	8.26243	8.26419	8.94908	10.3708	7.90402	6.56574	7.26815	7.59978	6.87529	7.27927	7.90876	7.80796	7.34862	7.49088	7.2532	7.36581	7.33203	7.31401	7.33756	8.07442	7.16497	7.81897	7.80511	6.93881	7.39703	7.87681	7.91	8.15698	7.20903	7.51132	7.2589	7.17157	6.54173	3.36594	7.43657	7.69228	7.54989	7.69895	7.92718	7.71882	8.07307	7.93791	8.24293	7.64738
DCDC2	5.45629	5.12025	5.79921	5.18772	4.36015	5.26535	5.26242	5.76391	5.92707	5.24772	8.71089	6.8701	7.36447	9.41191	7.32264	7.27895	7.34869	7.89044	7.86442	7.65705	9.3976	8.62149	8.21616	9.74429	8.61937	9.54111	8.47862	6.27352	8.29512	6.94017	6.78211	7.97688	6.71144	6.57226	7.97379	7.36999	6.51385	7.9202	3.36851	8.32585	6.61863	9.94419	8.41825	6.45481	7.90844	6.63287	6.53466	6.12295	7.26908
ZBTB42	7.09519	7.02049	7.01278	7.02176	7.05632	7.24729	6.55166	7.04258	8.07253	7.75292	9.96052	8.04699	7.99828	10.1328	7.637	8.42333	9.43705	7.8315	7.23752	10.348	7.28067	9.17332	8.67165	8.05223	7.7097	8.07659	8.01931	8.07708	8.43181	8.66976	6.82541	8.25413	8.70382	7.58131	8.19321	8.85245	7.82429	8.58566	7.76415	8.64979	8.78298	8.59991	8.47318	6.85702	8.74506	7.82289	9.59708	7.98681	9.34137
TK1	6.59859	6.3059	7.22039	6.33689	6.82424	6.2071	6.63676	6.43621	6.58718	6.4336	8.0761	8.43532	7.8638	7.91876	7.50805	8.15643	7.96308	8.84761	7.81261	8.01259	7.21759	7.15801	6.87375	8.53184	7.40262	8.16738	8.50746	7.48501	7.38112	8.24319	7.63085	7.78518	8.68105	7.11049	8.45776	8.37888	8.32287	9.18011	6.18783	8.26986	7.81905	7.01903	9.0459	7.07	7.41939	7.74803	7.64909	8.11243	8.11369
FLJ41455	3.54538	3.0321	4.0204	4.63008	3.0959	2.93191	3.47863	5.55637	4.37277	4.17334	7.33448	7.50922	5.97683	4.2203	6.64689	5.83921	5.20926	7.183	7.357	8.76785	7.08436	6.72536	6.57914	7.09754	6.42364	6.91518	5.32582	4.72124	8.40152	5.21552	7.0949	6.06728	4.03981	8.13128	5.78284	8.62187	6.29163	9.41018	8.7666	6.58596	5.08167	6.23476	7.02436	6.60423	6.62911	5.12743	5.53914	7.61988	7.27778
FOXL2	6.27786	8.35344	7.39004	6.61265	5.5609	8.43923	5.90278	4.76364	6.89193	8.73473	4.95962	5.207	4.43015	5.59345	4.34981	4.56049	4.52512	4.72062	4.40582	4.69151	5.2054	6.01545	4.61305	4.11359	4.39602	4.72733	4.6593	4.94319	5.80217	4.26084	5.07335	4.48197	4.37628	4.11111	5.05714	4.43571	4.10616	5.0894	4.19275	4.07505	5.01643	7.31038	5.49962	4.73054	4.5093	6.23098	3.91712	4.42066	6.11425
PNPLA3	6.9774	6.38292	6.16803	6.58745	5.11141	5.79699	5.10251	5.00423	5.2819	5.15715	8.16814	8.65244	8.50895	6.24414	8.5633	8.7065	8.32187	8.66707	8.74218	7.33689	8.32806	8.4139	8.58092	8.3643	8.34558	8.58739	8.92136	8.46984	8.36649	8.69258	8.8264	7.86961	8.49199	8.62948	8.58939	8.20416	7.72334	7.60804	7.07194	8.38782	8.60437	6.50843	8.50947	8.61675	8.545	8.9156	8.46597	8.99805	8.88634
PSD3	8.23094	8.69642	8.1462	8.67972	8.55648	9.00803	7.90727	8.23256	9.10155	8.74279	7.3468	7.88307	8.14209	7.49917	7.7654	8.04403	7.49339	7.72336	8.23237	7.96766	8.42943	7.77587	7.76926	7.60606	8.12805	8.30062	8.33014	8.09606	7.62286	8.27369	8.10356	8.15884	8.13721	8.10217	7.96425	7.61213	7.80557	7.37572	6.15049	8.04162	7.97552	8.38791	8.18213	8.21002	8.25017	8.39401	8.02594	8.38644	8.51815
LOC101929241	6.56314	7.00351	6.77425	6.67385	6.73267	6.62257	7.02491	6.55205	6.40126	6.78872	4.62475	5.05517	5.37545	5.3101	5.14339	5.02444	4.98262	4.92065	5.29544	5.12326	5.02716	5.26087	5.41596	5.10002	5.04195	5.05554	5.3952	5.11019	5.0944	4.81901	5.46469	5.36081	4.59335	5.22698	5.33713	4.93106	5.20131	5.32492	2.08114	5.3243	5.43059	5.54035	5.41419	5.32039	5.38346	5.73346	5.37457	5.71697	4.81714
SMOC2	7.23905	7.79835	7.81352	7.25771	8.90317	9.43854	9.48009	9.59559	8.43139	9.17441	5.87727	5.91219	7.65946	6.61528	8.7026	7.2698	7.75977	6.55599	5.78773	7.59506	7.22991	6.89194	6.40919	6.44132	7.04321	5.8412	6.54871	6.91038	6.51909	5.81792	6.82511	6.75014	6.38965	6.53102	6.69732	6.21366	6.70426	7.46559	5.00874	6.05405	6.87169	7.31934	6.18353	6.67021	6.2185	7.58771	6.91516	8.4695	5.51727
FAM155A	6.85724	6.44458	6.71674	6.60013	8.43597	8.64882	9.7848	9.14587	8.1002	7.8524	4.92835	5.04856	4.66726	5.72225	5.048	5.48239	5.97853	5.08554	5.01508	6.0798	4.90858	5.4769	5.10723	5.26032	7.27715	4.87778	5.35594	5.71604	4.66039	5.59874	6.06147	5.73008	5.56084	4.73086	5.76763	7.26663	4.83613	5.05453	2.01724	5.35628	5.19776	7.83787	5.6384	5.54365	5.20912	6.64843	6.75618	7.09114	4.96761
RAB11FIP3	7.83532	6.79137	7.70172	8.37949	8.15694	8.80176	8.89968	9.01319	9.00326	8.66119	6.89492	6.93157	6.07642	7.18479	6.01051	6.047	6.67753	6.91825	7.04209	7.94533	6.75787	7.02787	6.27644	6.0331	6.46355	6.89134	6.46152	6.65036	7.41266	6.41662	6.56314	6.64825	6.05494	7.21965	6.21944	6.60578	6.55462	6.18723	6.93022	6.14813	6.54249	6.6102	6.00897	5.75463	6.49386	6.39525	6.79044	7.28159	7.22048
ABHD12	7.78849	7.9091	7.73442	7.64854	7.16369	6.732	7.22945	6.68482	7.081	7.31671	8.07853	9.00817	8.36388	7.5145	8.68833	8.83623	9.43921	8.56415	8.54252	8.13304	8.9663	8.64857	8.45027	8.87347	8.48578	8.88908	8.80568	8.56107	8.39024	8.70458	8.62958	9.06941	8.8327	8.5759	8.62793	8.67953	8.94935	9.1904	5.64693	9.19054	9.35887	8.56376	8.4694	8.56522	8.3926	8.17314	9.09979	8.51365	8.44704
BLACAT1	7.48656	7.23903	7.95419	7.43688	5.72064	6.10891	5.62268	5.84602	6.36183	6.75313	10.8133	9.68652	8.96524	9.70589	9.70665	9.59122	9.47891	9.79984	10.1462	9.39347	9.77271	9.84864	9.43384	9.22877	9.97938	9.72131	9.39784	10.7736	9.46682	8.77162	9.79489	9.60625	8.71031	9.14247	9.68717	9.03886	9.21498	8.96733	6.78155	9.2015	8.88198	10.1769	9.78224	9.50556	9.34401	9.14256	9.85166	9.35482	9.42502
TWIST2	7.81176	7.73043	7.89717	7.84265	6.7134	6.62705	6.73025	6.55768	6.46377	6.8133	5.12791	5.22934	5.32447	5.38352	5.33244	5.30255	5.47401	5.27859	5.1755	5.61646	5.42719	5.10644	5.21705	5.56187	8.32272	5.20635	5.65206	5.25563	5.40144	5.70309	5.01676	5.13061	5.4296	5.32736	5.06714	5.27317	4.97672	5.171	3.04709	4.98758	5.19795	5.53536	5.11228	5.05392	5.22463	5.64957	5.35054	5.54959	5.16363
MGC27382	6.05752	6.38199	7.30916	6.68842	5.78074	5.61684	4.9391	5.26245	4.95445	5.25566	4.45451	3.73061	4.51843	3.82653	4.25953	4.6381	4.44257	4.11763	4.53731	4.0356	3.96343	3.79787	3.87974	3.71533	3.92238	3.65466	4.60855	4.44571	4.44121	3.99327	4.62888	4.25468	5.09458	4.13657	4.14512	4.07978	4.59245	3.58881	3.15309	3.83143	4.19554	4.73267	5.15214	5.03841	3.74677	4.26958	4.1294	5.36324	3.77102
FLRT3	8.14566	8.03108	8.74434	10.0048	9.73686	10.0206	10.4098	11.0081	10.3209	9.58534	5.32832	6.25745	6.35753	7.61015	6.39431	6.6662	6.46681	5.97818	6.48164	6.591	8.1478	7.88031	7.70492	5.96498	7.91387	10.6021	6.81206	7.08273	7.61974	8.20723	7.39018	6.89113	8.69952	6.52628	7.82846	6.54897	9.26131	7.4282	4.80667	6.8278	5.81875	6.31502	7.01298	5.9263	8.40345	7.42929	7.40191	6.81391	6.44022
BACE2	7.60145	8.09508	8.62315	7.95043	7.97118	8.50011	8.13402	8.62294	8.22816	8.07547	11.1856	9.14188	9.40119	10.2102	9.3293	9.85582	10.4563	8.35153	8.91132	10.042	8.75072	10.3573	9.78553	7.81515	9.39905	8.97285	9.05784	9.36542	10.1228	9.75158	9.70998	9.04694	9.00705	8.81756	8.91455	11.1803	9.34944	9.66478	9.79282	9.37405	9.21715	9.32195	9.4118	9.08991	9.05578	9.42671	10.1508	9.40515	9.15086
CCDC88C	6.11597	5.65511	5.9822	5.64498	6.03966	6.26763	6.09644	5.8037	6.26522	5.93036	8.53257	6.7196	6.46007	6.81183	6.94933	6.64354	7.22336	6.87909	7.18237	8.61305	6.72439	7.21737	7.07764	7.0917	6.77784	6.96777	6.97217	6.79118	7.39805	7.61594	6.70181	6.90171	7.07119	6.95588	6.9398	6.725	7.07423	7.15092	4.92318	6.88804	6.6436	7.56491	6.47626	6.16393	6.82732	6.43272	7.26208	6.8884	7.02286
HOMER2	6.95269	7.3761	7.86731	7.92274	6.65632	7.58714	7.02455	6.29467	6.98305	6.45482	8.74887	8.17414	7.66328	7.87167	7.0875	8.79477	8.00802	7.48271	8.67875	9.47933	7.84981	8.62763	8.961	7.45495	7.36559	8.27523	7.91083	7.60567	9.08245	7.6151	8.53781	7.80059	7.8467	7.89312	7.49421	9.41078	8.61869	9.55445	7.76558	7.15876	7.71118	9.32623	7.94325	7.50596	7.91821	7.61324	7.36568	7.70259	8.64744
ARHGEF19	6.38737	6.29992	6.78988	6.48827	6.74331	6.98598	6.61758	6.53108	6.84361	7.24818	7.42166	7.90947	7.95036	7.04643	7.92478	8.02839	8.11624	7.94104	6.66276	8.29482	7.66378	7.05403	7.57177	8.40265	8.02875	8.44781	7.67318	7.46245	7.96655	8.00603	7.6581	7.66288	7.75581	7.93986	7.56944	8.56662	9.25088	8.37073	5.43366	7.80293	7.21674	6.80593	8.14288	7.09325	7.85433	7.31087	8.00518	7.52686	7.54054
FAM60A	8.84643	9.61157	9.04331	9.18157	9.45446	9.77008	9.35353	9.5282	10.3045	10.029	11.0978	10.4894	9.74822	10.6722	10.2329	10.6296	11.3992	10.6137	10.1152	11.5911	11.0421	10.8295	10.7013	11.3155	10.264	12.1296	10.2557	10.5584	11.4544	9.93457	9.74898	10.1075	10.1914	10.2667	10.3404	11.3935	11.3504	11.5117	9.97665	10.44	9.55862	11.6837	10.3329	9.87435	10.5703	9.72546	9.93425	10.004	10.2328
CLDN15	9.84316	11.0425	9.51398	9.86849	10.9567	10.7978	10.6576	10.9399	10.639	10.7796	8.86807	9.14097	9.17727	8.3919	8.97329	9.35509	9.95326	9.12553	9.05503	9.03174	9.25961	9.42809	9.3763	10.0469	9.30481	9.6811	9.06137	9.30687	9.17496	9.27007	9.4211	9.99737	9.50249	9.22993	9.5204	10.0115	9.91779	9.99319	6.19667	10.0721	9.74233	8.14756	9.05363	9.53046	9.09745	9.43895	9.1216	9.17626	9.12902
SLC25A33	6.82667	6.89658	7.37517	7.28218	7.58014	7.39545	7.52806	7.57217	8.14502	7.2448	8.64279	10.1979	8.93688	8.97751	8.91497	8.76178	8.33327	9.43126	8.35639	9.43014	9.25417	8.12874	7.82224	8.89922	8.12959	8.57693	8.4169	8.61	8.84568	8.99885	8.10681	8.89749	8.45588	7.49841	8.73843	9.66569	9.93585	9.43808	7.81989	9.16769	7.74549	8.00983	8.58781	8.43254	8.59236	8.36104	8.40509	8.18008	8.61675
CHRAC1	7.66211	7.95174	7.911	7.58265	8.30041	8.398	8.45271	8.28127	8.36498	8.52509	10.0011	9.41584	9.1141	10.2792	8.02337	9.30986	10.933	9.64103	9.12213	9.59251	8.44157	9.61607	8.74331	10.395	9.20458	9.73755	9.17738	8.94377	9.77047	9.61034	8.91878	8.87968	9.19915	9.55581	9.2188	10.5032	10.0691	10.6482	8.21718	8.68005	8.81621	11.3959	9.24883	7.99229	7.89443	8.6771	9.3243	8.86429	9.13699
NPFF	9.45335	10.0734	9.54163	9.52608	6.5427	6.37449	6.60868	7.02998	7.49982	6.84665	6.14009	6.16909	6.20688	6.40596	6.4408	6.22351	6.3232	6.28846	6.25897	6.59109	6.12023	6.27279	6.40251	6.35687	6.31249	6.29574	6.09751	6.16362	6.22232	6.34163	6.1209	6.45207	6.15238	6.03773	6.11668	6.41359	6.47802	6.33671	3.41497	6.43974	6.76079	6.26712	6.23008	6.29406	6.17722	6.18157	6.13366	6.33094	6.21392
TMEM200A	8.23561	8.34729	7.95715	8.42865	7.65552	8.73267	8.76272	8.76163	9.65498	8.67696	5.74191	5.88992	5.29301	6.2026	4.82232	7.20506	7.1823	6.09658	3.86593	6.31599	4.77903	5.76007	3.49893	5.61438	7.59616	5.97343	6.31786	5.90545	4.72155	5.16667	5.8173	5.97529	6.42946	3.10493	5.54877	5.34337	4.37402	5.5436	3.99189	5.15449	6.37311	8.38995	6.20208	5.7337	5.27195	7.17531	6.99741	8.64546	4.95954
ZMYND19	7.05635	7.14142	7.32792	7.02831	7.66065	7.98743	7.63946	7.80476	7.66956	8.20695	8.99802	8.55796	7.698	8.93259	8.13066	8.00048	8.77757	8.37956	8.25754	9.83518	8.40785	7.70729	8.28251	8.63873	7.6184	8.19481	7.58293	8.05767	7.95702	8.89943	8.17698	8.71184	7.72591	7.94533	8.31077	8.83181	8.64433	8.76507	9.24152	8.65654	8.81236	8.22605	7.51173	6.95149	7.91585	8.04053	8.69031	7.72059	8.14282
CHRNB3	6.46246	7.27564	6.81494	6.98127	7.35791	7.167	7.18735	7.00575	6.95655	7.39652	5.78481	5.80905	5.96776	5.95519	5.69074	5.74124	5.51145	5.96283	5.97506	5.77913	5.94318	5.94241	5.91055	5.50367	5.85458	5.6572	6.2067	6.22997	5.70506	5.73352	5.97017	5.95508	6.42784	6.09629	5.89916	5.56729	5.67653	5.65364	4.12713	5.86651	5.85666	5.74898	5.5813	5.94273	6.09878	5.87611	5.84185	5.88402	5.74264
LINC01279	9.37674	8.84643	8.25823	8.43286	11.4366	11.228	11.2706	12.0291	11.1162	10.2854	5.21181	5.73878	6.10883	6.00526	6.32689	8.343	8.53723	5.71828	6.3025	7.56864	6.15474	5.05831	5.39043	5.75685	8.79848	6.76002	6.98311	7.48708	5.02773	7.98915	8.31037	7.89037	9.17361	7.45779	8.04333	6.32692	5.53691	6.44982	5.58691	4.8793	5.82558	6.29349	6.08309	7.21961	6.27558	7.98726	8.84803	9.21983	4.66004
PDGFRA	7.64303	8.66744	7.68428	7.41092	8.0297	9.26969	8.81747	8.78848	8.70764	9.23927	5.8479	6.06921	6.33425	7.8835	6.35811	7.10598	7.72747	6.47093	6.3428	7.08954	6.17765	6.64176	6.1093	6.13814	8.31826	6.21921	6.73469	6.92991	5.71678	6.74867	7.09984	6.80224	7.53859	6.13367	6.79908	6.51671	6.19577	6.33199	6.44079	5.7787	6.75403	9.861	7.17078	6.89101	6.67397	7.7385	7.35973	7.9215	6.62896
MEDAG	9.08262	9.3481	8.57999	9.15288	10.6145	10.053	10.505	10.8341	10.5615	10.1364	9.15012	8.12788	8.10911	8.80929	8.46889	8.59062	8.6028	8.53183	8.51819	8.83201	8.1619	7.92769	7.89141	8.0919	8.03019	8.08757	8.02513	8.34929	8.36308	8.62819	8.5231	8.26353	8.64829	8.36855	8.31011	8.84425	8.29119	8.69284	3.77451	8.26537	8.42499	9.51967	8.32978	8.31671	8.7326	8.35178	8.72073	8.69473	8.60486
CMTM7	8.81771	8.11635	8.43009	8.09299	9.45191	8.82255	8.94752	8.07056	8.71363	8.25357	10.8046	8.748	8.76739	10.1096	9.27462	10.1252	10.2613	10.0101	9.95085	10.6822	9.82799	9.6916	9.95466	10.5816	8.88599	10.3533	9.05821	9.63805	9.29742	9.13566	9.21504	9.7867	9.34648	9.48589	8.86809	11.5696	10.8447	10.9774	9.29234	9.47992	8.50658	11.623	9.53492	8.13266	8.78194	8.86769	9.1079	9.45449	9.25873
SLC41A2	7.94895	7.6533	8.26999	8.41544	7.90036	7.91182	8.37966	8.48571	8.27929	8.02163	6.5448	6.49004	7.31884	7.01341	7.68938	6.94875	6.44801	6.34212	6.63776	6.69117	6.51586	6.41351	6.26552	6.42713	6.5822	6.44172	6.51222	6.71972	7.02585	6.95756	6.56246	6.80197	6.97213	5.97058	6.36721	7.7874	6.54392	7.23856	5.47929	7.25939	6.50673	6.1071	6.46456	6.76186	6.68808	6.68177	6.67005	6.68095	7.09159
ELOVL4	7.08939	7.44801	7.12377	7.47567	6.73663	6.93228	6.09143	6.34744	6.34197	6.57675	5.39955	4.88162	5.78598	6.06693	4.75274	5.00875	5.08804	5.53047	5.5772	5.11009	6.09768	5.08314	4.7878	5.15168	5.66124	5.74832	6.38294	5.70947	4.9533	5.75129	5.36371	5.74586	5.97614	5.14962	5.89406	5.75344	5.59169	4.69175	1.94025	5.10204	5.51629	4.99995	5.3457	5.73822	5.02945	5.88058	4.84659	5.43477	5.68103
UBQLN4	6.96108	6.9354	6.986	6.84776	7.15306	7.27854	7.12635	7.05806	7.42859	7.44781	9.24529	8.7691	7.88416	9.61382	8.73643	8.19016	9.83091	8.84567	8.24802	10.1782	8.91188	8.73707	8.7218	9.199	8.3895	9.44023	7.95231	8.48559	9.37162	8.72599	7.84465	8.68004	8.17081	8.62407	8.61246	9.40151	9.3315	10.0272	7.99505	8.68453	9.55855	10.2087	8.64117	7.69283	8.03628	7.64755	8.95692	8.31999	8.35276
C11orf83	8.31274	8.47468	8.17117	7.77183	7.68499	8.37285	8.36424	8.52235	8.94433	8.95544	10.4286	9.65731	8.71833	11.1621	9.17594	9.60306	9.7864	10.0872	9.38806	11.2845	9.52333	9.14241	8.82119	8.49115	9.41468	9.27333	9.22546	8.99889	9.58955	10.1158	8.87732	9.41324	9.75309	9.34545	9.69842	10.9014	10.6969	11.4484	10.5466	9.1891	8.58959	10.238	9.21338	7.83377	9.1589	9.43835	9.59522	9.23335	9.76356
NBEA	7.20506	7.36937	7.09466	7.30377	7.93475	8.42926	8.11134	8.16271	8.43441	7.84907	5.85029	5.30995	5.52862	7.42847	5.29665	5.94262	5.74232	5.64721	5.35052	6.78407	5.64057	5.39649	7.00979	6.44163	5.89984	6.72393	6.07188	5.72475	5.82948	5.8175	5.62217	6.02258	5.6124	5.55218	5.34438	5.66648	6.83172	5.24296	5.14227	5.47594	5.52958	6.15272	5.96067	6.12374	6.37176	6.24104	7.4388	6.12219	6.18938
FAM117B	7.41277	7.16731	7.30692	7.05868	7.53495	7.54767	7.70915	7.35145	7.4699	7.57937	8.41284	8.40076	7.94537	8.83387	8.41809	8.71583	8.47315	7.68489	7.9503	9.35355	8.39972	8.73223	8.3105	9.18088	8.32139	9.28508	7.90867	7.91176	9.35493	8.17906	7.89904	7.78668	7.80221	7.96419	8.2004	8.47033	8.86342	8.5208	6.66138	8.53051	7.57485	8.97776	8.56333	7.7921	8.42798	7.66165	7.46216	7.9621	8.45571
COX5A	9.54656	10.0303	9.37058	9.27016	10.249	9.98029	10.1192	9.92998	10.1325	9.89526	11.5213	11.1027	10.186	11.2815	10.3291	11.3014	11.4682	10.8947	10.5608	11.0384	10.373	10.6015	10.6876	11.0298	10.6733	10.7912	10.2683	10.8458	10.9762	10.1442	10.0279	10.5271	10.3048	10.3422	10.6905	11.4102	10.844	11.8142	10.4252	11.3092	10.5338	11.4543	10.4815	9.93404	10.1131	10.4382	10.2356	9.96166	9.94185
TMEM98	9.76316	10.5889	9.57305	9.8142	10.5623	10.4322	10.6866	10.8339	10.8878	10.8685	8.01352	8.5439	7.56838	8.67621	5.69798	8.65477	7.42856	6.87228	5.95383	7.60507	9.09398	6.84359	6.87321	5.92816	7.54561	9.69002	8.14927	6.5099	8.2984	7.14916	8.31217	7.0738	8.11236	8.81985	6.49963	6.75774	9.50334	8.08072	9.69173	5.60402	7.49017	8.84115	8.66429	6.48659	8.61856	8.04266	7.56307	8.5433	7.95001
ANO5	7.43927	7.21724	7.51866	7.60965	6.91183	7.73601	7.60834	7.76859	7.8165	7.52917	5.99528	5.90705	5.91677	6.42897	5.91774	5.8104	5.7395	6.76137	5.79919	5.84708	6.82336	5.86844	5.82199	5.69479	5.8199	6.4231	6.04874	6.03244	6.53515	6.1348	6.29297	5.8331	6.05553	5.62479	5.81808	6.02281	6.22195	6.0498	0.931449	5.75361	5.8146	6.46173	6.18266	5.85053	5.59948	6.29122	6.22057	7.11125	5.54016
TUBA4B	6.69187	6.53781	6.66244	6.6807	6.16009	6.34535	6.47251	6.05245	6.16351	6.30238	8.91488	8.29924	8.13998	9.11898	8.38301	8.55688	7.85275	8.2301	7.92753	7.91489	7.86127	7.70819	10.0978	8.37207	8.18165	7.75867	8.05898	8.27449	7.85387	7.76135	7.7181	7.6112	8.91589	7.00626	8.47555	8.60262	8.71736	8.01844	5.83399	7.65791	7.61251	7.78792	7.96883	7.07566	7.94192	8.09443	7.70822	7.92918	8.28341
PLCE1	6.53597	6.17968	7.06185	8.11301	7.32485	8.16531	7.77408	8.52122	8.491	8.419	6.15669	5.4512	5.43061	5.91279	5.72027	6.05173	7.20002	5.5145	5.83422	5.16096	5.65672	5.92488	5.70169	5.38239	5.8291	5.38478	6.99766	5.90711	5.25814	5.46587	5.6316	5.63372	6.39088	6.40325	5.72613	6.2733	5.86901	5.14447	2.75453	5.0112	5.6985	5.88598	5.51936	6.55376	6.42912	6.49559	5.89589	5.57644	5.86381
TMOD2	6.71919	6.39531	6.47427	6.65065	7.2803	7.808	7.9123	7.39252	7.26945	7.02472	5.84514	5.38726	5.4805	5.78354	5.38121	5.91708	6.03829	5.50297	5.48752	5.25067	5.85756	5.93008	6.2739	4.93972	5.73613	5.49224	5.68384	5.49682	5.17105	5.53976	5.27576	6.44419	5.36638	6.75345	5.48091	5.55074	5.05095	5.45731	6.35066	4.98802	5.88071	5.51592	4.7173	5.39671	5.2467	6.31607	5.65762	6.38937	5.82547
SLC2A1	7.62102	7.91607	7.91393	7.49372	6.87226	6.90386	6.84479	6.49289	6.67697	6.71914	9.61712	8.62323	8.33744	9.42381	10.0115	8.69959	9.7997	9.65309	8.22861	9.52027	9.41521	8.72353	8.68408	10.0732	8.95251	9.45245	8.68044	9.25891	9.5743	9.28205	8.18257	8.83584	8.71683	8.33103	9.42752	10.4839	9.33932	9.99055	7.81621	8.73225	8.53327	8.83593	8.6102	8.00922	8.43365	8.25725	8.75622	8.09171	8.3596
MGC24103	8.973	7.80065	8.48063	8.9684	10.4523	11.308	10.915	10.6164	9.72695	10.3288	7.17658	7.13721	5.35832	6.96101	5.6277	7.47247	6.87395	5.85606	7.39288	6.16216	6.25598	7.26759	6.74461	5.26138	5.3119	6.54063	5.81751	6.73377	5.07326	5.17751	5.617	5.57672	5.63728	8.51764	8.29378	6.169	4.80147	6.31532	5.56493	6.51467	8.1284	7.82049	6.67041	4.19691	8.48115	8.02443	7.82072	7.30416	8.36079
ZC3H3	9.06996	9.73287	9.22964	9.2079	7.55598	7.08494	7.13728	7.3078	7.28257	7.27841	6.31665	6.23697	6.47233	6.4821	5.68157	6.14723	6.37009	6.00382	6.0642	6.05189	5.82793	6.39357	5.80084	6.85463	5.9362	6.21471	6.06831	6.17656	5.95484	6.53881	6.16894	5.98244	7.00742	6.21753	6.28774	6.12798	6.04687	6.23309	4.40222	6.55744	6.71382	6.83062	6.08833	6.45154	5.81155	5.89272	6.21911	6.29186	6.0611
RPS10P7	4.74448	4.86043	4.80429	5.05054	4.311	3.97881	3.8162	3.99948	4.17167	4.42004	7.66855	7.79407	7.75938	7.27203	7.71675	7.83351	7.52651	8.04685	7.56072	6.95832	7.40957	7.53678	7.37792	7.67957	7.5461	7.38233	7.81737	7.59619	7.58494	7.89743	7.6345	7.56965	7.93398	7.84112	7.79734	7.66162	7.36904	7.96536	2.98027	7.6741	7.61464	6.85268	7.46912	7.52856	7.42449	7.76438	7.63999	7.79678	7.68839
FEN1	8.97849	8.92944	8.71363	8.4511	8.3063	8.22008	8.05382	8.17897	9.13096	8.20264	10.7095	9.51735	8.82583	9.7566	9.8444	9.63568	10.1833	9.98777	9.27592	11.4051	9.53995	9.26431	8.59646	9.67107	9.43783	10.1175	9.56567	8.94825	9.93219	9.59687	9.00347	9.32593	9.26947	8.89376	9.46934	10.0991	10.5405	10.547	8.40507	9.25442	9.68824	8.87945	9.41362	8.72294	9.13803	8.868	9.68377	9.28484	9.22403
PLA2G2E	4.89897	5.09229	4.87629	4.60665	4.56875	4.7206	4.68943	4.81724	4.58997	4.7472	7.90262	7.94941	8.16608	8.04327	7.74701	7.94927	7.71414	8.05115	7.99157	7.14701	8.09008	7.90732	8.2875	7.85283	7.92585	7.92233	8.23356	8.00722	7.82842	7.89903	8.05534	8.27423	7.95467	7.90219	7.90182	7.99366	7.99049	7.59147	4.12395	7.60722	7.79644	8.21008	8.21842	8.13358	8.24184	8.35831	8.30115	8.24896	8.29601
NKAIN2	6.33447	6.11524	5.59672	5.72627	5.3868	5.42369	4.48746	4.98102	5.53835	5.46902	4.16521	4.31433	4.93658	4.82183	4.90819	4.1956	4.28558	4.34385	4.31044	4.05663	4.76131	4.32162	4.21355	4.421	4.30426	4.12686	4.55398	4.73673	4.53789	4.61866	4.78665	4.35316	4.97602	4.01576	4.77552	4.45934	4.30283	4.53686	3.03016	3.99589	4.58332	5.07596	5.47369	5.0542	5.01855	4.52293	5.54301	5.11662	4.77197
PPAP2A	8.96209	9.94424	8.89194	9.25852	9.92484	9.36177	9.35745	9.91218	10.0531	9.48159	8.76731	8.91071	9.00642	7.67923	8.96635	9.13522	9.20778	9.08314	8.77992	8.63466	9.12085	9.05412	8.99941	9.11054	9.26977	9.06793	9.08461	8.8546	8.91198	9.17563	9.03184	9.18535	9.02761	9.03765	9.04338	9.7063	9.33948	9.00673	6.34264	9.75828	9.07337	7.57386	9.18664	9.38335	9.05025	9.434	9.14478	9.44571	9.24058
VGLL3	8.27771	7.04087	7.9874	8.88766	9.64795	9.42222	9.86705	10.116	8.76935	8.70902	2.93418	4.18315	4.16568	4.688	5.65226	5.71284	8.30341	5.02858	4.12244	8.42853	3.40943	4.24285	3.15401	5.80645	8.95563	3.5889	5.91132	6.9342	3.2806	6.4992	4.5808	5.8696	6.63281	3.04483	6.3202	5.50428	4.87388	4.02228	2.53266	2.39219	4.07247	5.68245	4.70645	5.68212	5.58231	7.20779	7.46022	8.07102	3.72895
FAM134B	7.59174	7.53703	7.39557	7.67421	8.48844	8.59601	8.64901	8.30074	8.13908	7.66483	6.00728	6.35337	6.40306	6.287	5.96418	6.32856	6.08621	6.31158	6.01777	6.42822	6.93153	7.07702	6.76394	5.89512	6.52864	6.0166	7.06048	6.26031	6.94918	5.85052	7.54559	6.8713	6.43391	6.23443	6.0786	6.40608	5.61929	6.38897	4.61729	5.79189	6.17959	6.63779	6.01956	6.87171	6.24796	6.61987	6.906	6.5964	6.80003
CD82	6.67947	6.13898	6.45362	6.38308	7.01717	6.1889	6.80797	6.94099	7.25895	6.51956	8.11436	8.3374	7.40137	7.93635	7.65825	7.11826	8.09789	7.64574	8.63988	7.51584	7.17703	6.96274	7.96317	7.11942	7.49333	6.75326	6.88186	7.65029	8.56749	7.46161	8.46034	7.19331	7.69782	7.17874	7.58093	8.23505	6.43155	7.76788	8.77909	8.34231	7.60222	7.01708	7.05168	6.77779	6.78756	6.59192	7.71462	7.0315	6.46618
PPIF	7.65256	7.75792	7.7003	7.61242	7.82441	7.85222	7.85578	8.17719	8.28865	8.14516	10.2678	9.32902	9.21162	9.31823	8.71617	8.97062	9.45419	8.77917	8.88136	9.22599	7.73967	8.2344	8.73657	8.88052	8.87789	8.49972	9.09681	8.45999	9.52118	8.55594	8.47758	8.19504	8.7232	7.86508	8.59503	9.29189	9.06729	9.60063	8.65381	9.29855	8.47218	7.77079	8.62758	8.0121	8.258	8.18758	8.50297	8.50509	8.29
FAM83H	7.44929	7.49404	7.58835	7.51139	7.82618	7.95297	7.84585	8.12139	8.44472	8.33828	9.75141	8.93236	8.52098	9.89867	8.16294	9.08873	9.97756	8.86079	8.96178	8.58146	8.55608	9.70644	8.52076	9.79913	8.97049	9.00338	8.78214	8.97473	8.88011	9.05804	8.66804	8.76716	8.66035	8.8468	8.91498	9.68468	8.45291	10.1507	9.35955	8.68327	8.42611	11.0721	8.3749	8.21115	8.02383	8.57849	9.3469	8.50751	8.43555
RP4-798A10.7	6.04449	6.14963	6.1279	6.42463	5.49321	4.71133	5.47291	5.37399	5.39013	5.4049	6.41603	6.4358	6.65708	8.04284	7.39431	6.68767	6.98465	7.46218	6.62301	7.07492	7.99763	6.72215	7.08364	6.39394	6.95964	6.49814	7.06054	7.47061	7.4098	6.25586	7.91899	7.59976	7.27468	8.06795	6.04062	6.88924	7.23832	7.06398	6.19042	7.1699	7.44827	6.3981	7.58022	7.84117	7.80353	7.24267	6.68684	7.00375	7.4366
WDR43	7.72759	8.21697	8.21362	7.95837	8.71623	9.03207	9.11722	8.90138	8.73113	8.62143	11.0702	9.34354	8.58112	10.1772	9.33226	9.51444	10.324	9.11732	9.43724	10.2375	9.36602	9.65683	9.54762	9.38869	8.85368	10.4167	8.89699	8.74637	9.43362	9.22733	9.03408	8.62818	9.17003	9.32174	9.2407	10.3234	9.94491	11.1785	9.71247	9.59214	8.91868	10.3708	9.10362	8.4051	8.97692	8.68784	9.28375	8.96455	8.83325
ZEB2	7.70326	6.50963	6.41937	6.34314	7.44611	7.32121	7.52041	6.39377	6.63265	6.78227	5.72947	5.84987	5.65607	5.54009	5.70038	6.09542	6.11525	5.27415	5.64415	5.60243	5.15901	5.42642	4.91726	5.65346	7.06047	5.02688	5.54251	6.27581	5.00751	5.60794	6.30605	5.9847	5.70799	4.9897	5.69413	5.47205	5.15499	5.96131	4.01271	5.6175	6.1392	6.8738	5.69324	6.25777	5.5693	6.86242	6.22836	7.15525	5.28756
STAMBPL1	7.08075	7.43605	7.238	7.19095	7.90347	8.08799	8.25127	8.29322	7.96788	7.75093	6.53475	6.17047	6.6635	6.11937	6.27148	7.00622	7.08746	5.93182	5.8093	5.66795	6.06555	6.32459	6.8236	6.26672	7.45477	6.03242	6.73634	6.43212	6.11414	6.1057	6.74336	6.47262	6.65813	6.5565	6.63813	6.76004	6.28547	6.27891	5.1493	6.49732	7.13329	6.81029	6.04938	6.7683	6.13739	7.56826	6.73232	6.66827	6.57984
LAMA4	7.63397	7.87128	7.45272	7.77014	9.75374	9.47583	9.66477	9.7395	9.00059	8.73891	6.98893	7.15214	7.75475	7.52159	7.11209	7.39312	8.29372	7.23073	6.98804	7.20254	6.74612	6.70004	6.77579	6.84852	8.3211	6.77124	7.34345	7.80432	6.64901	7.22673	7.59053	7.31231	7.48644	6.96415	7.75777	7.11821	6.87504	6.76878	3.93718	6.82808	7.27669	7.73894	7.04272	7.54266	7.09344	7.69642	7.76112	7.85618	6.83712
RBL1	8.32084	8.26545	7.8138	7.69299	6.45081	5.96547	6.34718	6.20219	6.45003	6.05002	5.30913	5.28039	4.89628	4.9839	4.79745	5.35991	5.86847	5.34185	5.12978	5.7011	5.56867	5.54204	4.8656	5.14789	4.98495	5.75087	5.79634	5.07316	4.63037	5.43287	4.92265	4.81515	5.88024	4.8348	5.08886	5.25783	5.13488	4.99132	4.59349	5.32631	5.50466	4.37594	4.5792	4.61312	5.01898	5.11163	5.39141	5.0706	5.28434
FXYD3	8.09255	7.90567	8.45621	8.0781	6.97265	6.57617	6.99858	6.65465	6.69919	7.05553	10.1055	10.5699	10.6103	8.80743	10.6516	10.8821	10.6901	10.1964	10.7382	9.63245	11.0107	11.0084	10.934	10.529	10.8019	10.3757	10.8525	10.7131	10.2251	10.5875	10.7842	10.7322	10.9016	10.5159	10.7883	10.5688	10.4727	10.7475	8.00707	10.8337	10.27	9.18602	10.6906	10.7673	10.4598	10.5854	10.3484	10.7552	10.3988
SYNE4	8.42445	8.49587	8.85976	8.89255	6.30778	6.49767	6.2249	6.40802	6.32032	6.67495	8.99826	9.01004	8.95686	8.96125	8.58315	9.03915	8.55197	8.52253	8.15769	8.81842	9.75392	8.91629	8.76815	9.25609	7.84945	8.57786	9.12418	8.62574	8.97809	9.23969	9.10924	9.01167	9.39613	8.98471	9.44027	8.57475	8.27398	9.01151	8.11476	8.31498	8.26608	7.28389	9.18692	9.25488	8.55665	8.79822	8.46712	8.81591	9.9365
LRP1B	6.38793	6.38846	5.97862	6.04634	6.07675	6.45618	6.32984	5.855	5.89141	6.57777	4.34166	3.60537	3.76651	5.09268	6.6401	3.69921	4.40626	3.80701	3.50043	5.55895	5.39862	3.54775	4.05419	3.73033	3.71623	4.59939	3.59965	3.40186	4.13259	3.84456	3.01253	4.78226	4.46862	4.1325	3.38717	4.56166	6.17117	4.03061	2.00628	4.9792	4.13162	3.64569	5.40413	4.024	4.65039	4.29751	3.0688	4.14333	4.8264
GALNT6	6.57955	6.27851	7.12077	6.23412	6.20393	6.51829	6.07835	6.23439	6.35129	6.17772	8.99213	6.58698	6.78354	7.81547	7.63203	7.7266	6.27816	6.99406	6.61456	8.57468	6.94238	7.43041	8.08407	7.52474	6.83512	7.95866	6.9619	7.57875	8.11711	7.42904	7.42768	7.18922	7.67869	6.30876	8.47976	8.31948	7.99501	7.99639	6.02437	7.43154	7.40343	5.97163	7.60989	7.04601	7.73807	6.86222	7.78948	7.67035	8.77659
LPAR3	7.43125	7.18089	8.17625	7.79754	5.02469	6.33515	4.82239	4.92834	5.65998	5.4966	9.05517	9.26915	8.17057	11.4023	9.16502	10.8476	7.79457	8.08295	9.40724	9.08101	8.10811	8.98453	7.46497	10.7483	9.04161	9.60678	8.62573	9.50964	8.97228	7.45892	8.47391	9.24869	8.79307	7.15258	8.90064	9.17616	9.99659	10.73	8.85278	9.11473	9.383	9.49585	9.94146	7.56231	8.78489	8.70353	8.84462	8.96078	9.01465
SIX4	6.22631	6.53708	7.35313	6.79862	6.7662	7.61006	7.99474	8.00964	7.66366	7.76981	10.2014	8.2164	8.11286	7.60513	9.31375	8.63227	7.92461	8.91123	8.3759	9.54985	8.58866	9.05413	9.65368	8.42857	7.62312	9.91552	8.65025	7.97123	9.27493	7.98516	7.45642	7.85584	8.74916	8.85257	8.04023	8.98488	8.87964	9.00078	6.30146	8.0646	7.85814	9.17568	7.35686	6.69925	7.74732	7.23861	8.96197	8.51938	7.82282
RP11-320H14.1	5.19609	5.4745	5.03588	4.64936	5.50169	5.28891	3.80565	4.2347	5.45487	5.47741	3.90055	4.25871	4.21691	4.37983	3.83603	4.14656	3.7217	4.07095	4.13098	4.1966	4.01889	4.07217	4.01985	3.65794	3.94284	4.08115	4.31527	4.41019	3.96994	3.89977	4.10463	3.98999	4.08268	3.97094	3.99751	3.85486	3.83157	4.21818	1.74557	3.07363	3.93415	3.61029	3.61004	3.21762	3.89468	3.4811	2.66342	3.37433	3.39039
MCOLN2	7.3769	6.96758	7.02489	7.7843	7.69893	8.27679	7.55518	7.57036	8.28515	8.30837	7.07844	6.63522	5.98444	7.67706	6.78386	7.68181	7.7169	6.29545	6.8625	7.00205	6.35074	6.4787	6.70719	5.92339	6.38514	6.70157	6.58232	6.48686	6.59049	6.19742	6.12441	6.64094	6.02348	6.12571	6.32722	6.06862	6.17134	6.97413	4.76725	5.85524	6.45799	6.43321	6.27682	5.53273	6.06857	6.41607	6.30273	6.9343	6.91779
SKA3	6.64277	6.22968	6.97972	6.61281	6.75583	5.71358	6.56826	6.21747	6.09624	5.69148	7.75029	7.83151	7.54428	6.57809	8.03706	8.45872	7.39102	7.83366	8.47341	8.33229	6.78162	6.79521	6.79206	7.74069	6.81044	8.49379	7.51677	7.05688	7.64181	8.35893	6.81338	7.68108	8.26772	6.82765	8.28981	8.49678	8.1719	8.1025	7.20713	7.60447	7.87706	7.51412	6.86236	7.00711	7.63186	7.86445	7.86722	7.57453	7.66643
ST8SIA1	5.21628	5.46266	5.25405	5.29422	6.3815	6.29507	6.37646	5.83987	5.56457	6.09186	4.71305	5.55993	3.79121	3.86855	4.07398	4.78601	4.68672	4.12515	3.58908	3.98921	3.70791	3.51334	5.10459	4.20017	5.28115	3.07064	4.05389	4.37512	3.98049	3.82866	3.96369	3.72542	3.70625	6.13064	4.89171	5.13521	4.48957	4.01092	4.4143	3.96888	4.20252	3.35731	3.62026	3.82849	4.48303	4.04489	4.59463	5.38316	3.69232
DLX6-AS1	3.19502	3.39685	3.43816	3.02383	2.53545	1.97941	2.58075	2.29073	2.25012	2.59346	6.52698	7.49789	7.55396	5.69358	7.4081	7.69167	7.30714	7.44827	7.42494	6.25902	7.44697	7.38329	7.34436	7.25049	7.30151	7.01145	7.61547	7.45675	7.06696	7.59225	7.66191	7.56549	7.6618	7.68165	7.59099	7.31796	7.35585	6.93274	2.04762	7.68463	7.51739	6.31825	7.28594	7.41314	7.28361	7.55192	7.48095	7.2728	7.52909
ST14	6.35397	6.71796	7.55898	6.81258	6.94639	7.39413	7.27533	6.75287	8.15309	8.16841	8.05589	7.89073	8.82822	8.54947	7.75056	7.81963	8.51101	7.45544	8.77088	8.02141	7.80052	8.23613	7.06723	7.1274	7.97328	7.8308	7.44357	7.54566	8.35882	8.93879	7.4554	7.79541	8.12844	7.64458	8.14108	8.44804	8.01336	8.2929	7.349	8.4479	7.34044	7.83268	8.17837	7.8255	7.68817	7.97534	8.11012	8.21903	7.05503
MELK	7.88258	5.69767	7.99507	5.60291	6.67782	6.60013	6.62952	6.71158	8.07758	5.89389	10.1679	9.83434	8.8422	8.63609	10.4004	8.88416	10.5231	10.1925	9.12117	12.3238	9.4353	8.20739	6.58851	10.4203	8.50335	9.77835	8.88027	8.12096	10.0816	8.8832	6.51563	7.97897	8.99107	6.80115	10.0499	10.7313	9.80013	10.4304	8.43778	8.58236	8.3268	8.65807	8.6829	7.7852	8.97047	7.58272	10.0156	8.79581	9.25445
DLGAP5	6.29732	4.57879	6.68999	4.50429	5.4314	3.89885	3.57706	5.79916	6.34034	3.70386	7.86304	8.25511	8.30503	6.9388	10.3576	8.70546	8.48182	10.0812	7.64886	8.76193	8.54334	5.98626	4.98959	9.3025	6.92539	8.54626	8.5002	7.77854	7.41509	8.56884	6.08941	7.29132	8.72938	6.05668	8.94422	8.57112	9.63978	8.04517	4.65651	8.30895	8.18471	7.10322	8.12929	6.40593	8.20581	6.74315	8.81173	7.85887	8.86241
TMC4	10.569	11.4704	11.4503	11.0394	8.21519	7.20854	7.36638	8.72845	8.70148	8.7179	10.7417	10.9503	10.8765	9.52417	11.1945	11.177	11.0889	10.7727	10.8539	10.5172	10.8544	10.984	11.1996	11.0544	10.9894	11.0679	11.0655	10.8781	11.0798	11.0326	11.1374	10.8906	10.9317	10.9926	11.1675	11.0917	10.8401	11.3158	8.76012	11.1617	11.049	9.47208	10.9272	10.9901	11.0625	10.94	10.7747	11.1739	10.8405
LOC101927723	10.3224	9.95368	10.6387	10.2794	9.58521	8.23323	9.07233	10.0383	9.62595	10.2684	7.50629	7.58535	7.65091	8.05718	7.1448	6.8635	7.89815	8.06788	7.321	7.45534	7.90258	7.64563	7.89949	6.95636	8.01849	6.95559	6.99519	7.47237	7.31084	7.17866	7.35624	8.03355	9.31197	7.85843	7.27952	7.55397	7.54726	7.88654	7.69839	7.58302	8.23837	7.22835	7.03556	6.2788	7.14964	6.96453	7.20582	7.64362	7.67474
HK2	9.07948	6.78372	8.2248	7.00606	8.97641	8.40551	8.3143	8.8464	9.35464	6.8851	11.2324	9.86911	8.02425	9.82462	9.28449	8.58138	11.5956	10.416	9.16331	10.976	9.10569	9.6596	9.48332	10.0893	8.4418	10.418	9.43147	8.99549	10.1545	10.0969	8.3127	8.54403	9.19457	9.17063	9.92313	10.8239	9.91146	9.41148	8.5699	8.24338	8.17168	9.30051	9.44752	8.84074	8.86655	8.43266	9.68243	8.65924	9.42439
PP2672	8.86213	7.36116	8.41104	8.57137	6.76714	6.0236	6.50395	6.31499	6.69812	6.64967	5.93295	5.8347	6.1274	5.86969	5.76524	5.92328	5.91888	5.93194	5.96614	5.76256	5.75246	6.10283	5.73725	6.19112	5.67161	5.847	5.3861	5.42845	6.04049	6.32841	5.88208	6.36294	6.16667	6.16282	5.52991	5.83455	5.8308	5.7428	4.89835	5.95169	6.20229	5.93779	5.39456	5.79374	6.04776	5.47681	6.8226	5.39286	5.52364
MYO1F	8.70337	7.52232	7.43178	6.994	9.52904	8.19614	9.14288	7.96667	8.16957	7.84876	6.64743	6.1727	6.58186	6.45372	6.52023	6.76528	6.11422	5.83535	5.83006	6.21019	6.12224	6.37981	6.4397	6.88203	6.62045	6.37329	5.99479	6.43703	5.73325	6.53846	7.36646	6.89373	7.16708	6.23032	6.56763	6.22002	6.55125	6.85331	6.58555	6.94692	6.71486	6.2098	6.15823	6.81089	6.24642	7.02123	6.36334	6.71517	6.0642
MYO10	6.81165	7.09429	7.34846	6.86948	6.40821	7.31123	6.50275	6.57578	6.41417	7.58322	7.83263	8.57993	7.74387	7.61507	7.66059	7.57172	8.19132	7.4299	7.17728	8.06205	7.8329	7.99175	7.4749	8.76694	8.41089	8.78016	8.30985	7.70543	8.35237	7.84096	8.20711	7.78761	8.38875	8.35871	8.63696	8.96669	8.22931	8.16145	6.09006	8.15386	7.54487	10.1959	7.45618	7.93992	7.6237	7.88597	7.85479	7.92677	7.77646
CCNB2	6.66892	5.844	7.17876	6.22385	6.38654	5.65673	5.6168	6.17779	6.69188	5.59357	8.23755	7.68277	7.13379	6.40729	8.43563	8.03033	7.81803	8.26103	7.98726	7.82536	7.27711	6.65739	5.96874	8.60813	6.6017	7.65936	7.72077	7.30345	7.59373	7.75178	6.63989	7.42477	7.93895	6.9182	8.25133	7.9068	8.34216	7.4596	5.93309	7.85121	7.81146	6.69042	7.66081	6.72627	7.19886	7.40823	7.39613	7.49111	7.68138
FAM174B	8.4669	9.07242	8.80716	8.48522	7.59093	7.3041	7.59421	7.58025	7.28179	7.58174	9.83598	8.82065	8.78463	8.57584	8.75879	9.05329	9.02774	8.76162	8.88729	8.85455	8.62155	9.19515	8.99868	9.8514	8.87802	9.03937	9.28593	9.12376	9.60869	8.98212	8.83378	8.80466	8.95988	8.84758	8.63656	9.25494	9.31628	9.45422	6.01526	9.56587	8.77545	8.75602	9.17192	8.84779	8.9508	8.80753	8.84007	8.88794	8.97306
GNPNAT1	7.74196	7.92244	7.766	7.59758	8.22839	8.35175	8.4487	8.41973	8.87869	8.95769	10.6043	8.73883	8.49711	9.75877	9.22978	9.25826	9.58552	9.11963	9.56703	9.31976	9.12893	8.90454	8.43351	9.24347	8.66085	9.1604	9.3465	9.23023	9.13938	9.21776	8.32817	8.55346	9.0971	8.4174	8.84091	9.05414	8.52374	8.95566	8.23108	9.17762	8.91767	9.44142	8.88913	8.67148	8.88135	8.15155	9.54519	8.91177	9.1086
AC007292.3	5.36881	5.49099	5.61087	5.49094	5.69099	5.5146	5.65739	5.67268	5.47992	5.6011	7.10205	6.93579	6.91376	7.63883	7.06057	7.45773	7.41283	6.8171	7.11028	7.17631	6.70849	7.18279	7.28236	8.25447	7.28626	7.60595	7.60506	7.03341	7.0537	6.84849	7.50866	7.33483	6.86349	7.3715	7.32276	7.43674	7.77714	7.57266	4.3533	7.5432	7.70562	7.49022	7.32401	7.10483	7.4053	7.573	6.65459	6.6223	7.44897
GPD2	7.09093	7.09294	6.99633	7.04442	7.57011	7.85351	7.65069	7.73291	7.92533	7.62091	8.65519	8.57629	7.90913	8.79404	8.1346	8.45188	9.70396	7.25969	8.13072	9.55191	8.05396	8.89667	8.35435	8.42414	7.6441	8.28177	7.67343	7.9538	8.24485	8.26857	7.91009	7.77822	7.37744	7.89093	8.21069	9.19404	8.04977	9.05055	8.223	8.05463	7.70254	8.89022	8.47999	7.52229	8.21014	7.42657	8.33565	7.72619	8.52231
CFHR2	6.47209	7.24403	6.74012	7.66862	8.61605	8.22212	8.57229	9.73699	8.41358	8.67064	5.82338	6.36736	6.08946	5.56565	6.71331	5.72708	6.24721	5.02312	4.82377	5.59969	5.63127	5.15758	6.22249	5.08487	6.48822	5.17999	5.25647	5.36734	5.4925	6.48413	6.49316	5.01793	6.59226	4.82553	5.31808	6.91198	4.99367	4.96464	3.60407	4.57652	5.10956	6.06305	5.48344	5.21935	5.35791	5.48553	6.30348	7.16296	5.06471
VWA3A	7.134	7.23415	7.18464	6.99165	5.57869	6.30655	5.22339	5.10802	5.38471	5.63017	9.39204	9.02529	9.237	8.83065	8.83988	9.16382	8.80409	9.13002	9.42881	8.38653	9.21223	9.38809	9.08848	9.37669	9.09038	9.1075	9.36666	9.38295	8.77745	9.15106	9.18108	9.18153	9.23433	9.07294	9.10849	8.64101	8.72705	8.57978	7.17614	8.80973	8.73153	8.74002	9.08168	9.25052	9.11294	9.20151	8.98633	9.17714	9.28057
UNC5D	4.97377	5.55124	5.20086	6.48825	6.23075	6.81159	5.98535	5.64796	6.92422	6.79204	5.09746	4.90701	5.14354	4.83859	5.01695	5.07407	5.01842	4.87419	4.88967	5.1548	5.24817	5.18075	4.67465	5.1279	4.88203	5.68855	5.42227	5.1848	4.73186	4.69612	4.87119	4.84717	5.08485	4.91444	5.01732	4.97363	4.4621	5.14192	2.95326	5.17876	6.03989	4.70607	5.05776	5.84844	4.77279	5.07771	4.8987	4.94462	5.24122
FRY	8.41585	8.56068	7.76425	8.18583	9.05411	9.18542	9.10885	9.41587	9.61414	9.31393	6.77724	5.66361	6.61375	7.55617	5.8534	6.26173	8.07489	5.92563	6.25338	6.61782	6.10572	5.83481	7.50849	5.63169	6.69736	6.64291	6.31998	6.05228	5.59558	7.49895	6.39333	6.2739	6.71428	7.41642	5.81463	6.9737	5.82372	5.81915	5.66054	5.23265	6.25173	6.73252	5.85477	7.40195	7.01783	6.83535	7.0036	7.07387	5.6167
WDR17	6.50003	6.11166	5.72064	6.42611	6.36246	6.92707	6.99034	7.15032	6.59494	6.45638	4.57127	3.39704	3.50109	4.22267	3.43257	3.57683	2.95497	3.4532	4.03087	4.05305	4.23814	4.72197	6.34075	2.96223	3.65209	5.18803	4.92344	3.52767	3.47419	3.38699	3.47199	4.21162	4.83061	5.26138	3.70587	3.07174	5.57085	3.52243	2.24493	3.26351	3.28542	6.09484	3.96414	4.45022	4.10096	3.83552	3.39261	4.12748	5.6863
LRRN4CL	7.17891	7.87174	8.00735	7.74151	7.80941	8.23495	8.0238	6.76086	6.3558	8.36601	6.5051	7.07668	7.80339	6.86953	7.09648	7.58438	6.74518	6.92038	6.93584	5.97397	6.74383	7.37183	6.48467	6.63792	7.1884	6.37854	7.75761	7.44567	6.37408	7.23838	7.66831	7.36817	7.71298	7.00818	7.15477	6.94546	6.92414	6.89516	5.19657	7.26736	7.13854	7.76861	6.89894	7.3524	7.36647	7.63805	6.37257	7.34779	6.5491
SLC34A2	8.62551	8.25015	8.8557	8.67	9.10152	9.29022	9.00626	9.62069	10.4635	9.11838	12.0107	10.7316	9.79151	11.649	10.1188	10.0988	12.0996	10.4618	9.53154	11.7688	10.1832	11.0144	11.0847	11.0167	10.1512	10.4043	9.98596	9.91279	10.8026	10.5161	9.69754	9.16452	9.7643	9.2499	10.7989	10.7919	9.7103	11.301	11.0711	10.6468	9.12201	10.8484	10.0469	9.67894	9.4352	7.98925	10.4393	9.75104	10.1376
TRMT12	7.58978	7.8142	7.50083	7.50608	7.8896	8.10915	8.21687	7.87052	8.37761	7.96134	9.29283	9.35713	8.52207	9.64091	8.32043	9.61627	8.97088	9.24189	8.94623	10.0616	8.10449	8.99575	8.40772	9.71082	8.73021	8.68035	8.62826	8.27451	9.30585	8.57318	8.8263	8.56275	8.84878	8.63953	8.53482	9.62044	8.96016	10.7572	9.4727	8.36128	8.36511	10.3627	8.13885	7.11486	6.91712	8.53218	8.79437	8.53095	8.26222
CENPK	6.39459	4.27682	5.84866	4.87728	6.00179	5.11038	6.17608	5.86343	5.7433	5.37499	6.92954	7.47883	6.87672	6.2296	7.5257	8.00703	8.10927	7.97101	7.31233	8.88868	7.26721	7.15675	7.36126	8.86226	7.88053	8.8796	8.018	7.75353	8.0754	7.81197	5.90226	7.22212	7.37742	7.2812	6.55217	7.70197	8.87	6.96148	5.92636	7.62161	8.72371	5.91418	8.14593	5.77381	8.02589	7.89036	7.01408	6.7502	8.4802
ASL	7.15583	6.98503	7.37162	7.12924	7.15919	6.70307	6.83204	6.62653	7.31934	6.9791	7.49029	8.90773	8.28634	7.18089	8.30894	7.91444	8.06919	8.68568	7.61839	6.82623	7.53835	8.34611	7.92533	7.84285	7.52812	7.57922	8.49813	7.9976	7.90472	7.6644	7.85882	7.73924	7.6121	7.58721	7.55671	7.79358	7.34912	8.67709	6.90386	7.75957	7.40061	8.03966	8.42467	8.62313	7.85148	8.0945	7.99461	7.89645	7.74513
TES	9.00516	9.43122	8.97829	8.70105	8.5436	8.4258	8.08296	7.82974	9.13562	8.19071	10.3124	9.89165	9.32765	9.52507	10.3956	9.0836	9.92488	9.92453	9.43938	9.84213	9.45378	10.3837	9.77397	10.7461	9.96936	10.2644	9.5091	9.38249	9.66821	9.60453	9.02677	9.30115	9.23343	9.54979	9.02276	9.96865	9.04876	9.96425	8.79526	9.33437	8.64011	11.6247	9.30569	8.95822	9.61461	8.86298	9.52545	9.35359	9.1905
FRAS1	7.93525	7.58516	7.75411	8.02669	9.88507	9.3572	9.33352	10.1615	9.9121	9.02805	7.21591	6.70817	6.95395	7.52668	7.21697	7.19535	6.76399	6.73278	6.78705	8.52587	7.28724	7.32476	7.05067	7.06869	7.36818	8.88781	7.52463	6.89422	7.60716	7.23757	7.46481	7.55847	7.47386	7.13439	6.82986	7.81832	8.56036	6.71707	3.77483	7.31352	7.18688	6.7497	6.91725	7.26608	6.85662	7.06174	8.06141	7.3962	7.43861
SIGLEC16	7.08004	7.03253	6.72932	6.24346	6.04136	8.34535	6.40257	5.82457	6.88911	8.38472	6.10112	5.59674	5.66035	5.49882	5.95174	5.69079	5.80315	5.58892	5.58529	5.2286	5.41126	5.40754	5.60902	6.14051	5.77678	5.35786	5.63847	5.69998	5.39342	5.7516	5.68486	5.89496	6.07212	5.52713	5.72232	5.54204	5.35246	5.97828	1.67532	6.14235	7.27013	6.22078	5.8816	6.11466	6.11287	6.23042	5.4498	6.12433	5.25068
SGCG	7.2119	7.96977	6.73484	6.80989	7.82458	8.80787	7.17365	7.40494	9.13506	8.64986	6.68424	6.72728	7.02758	7.12779	7.33485	7.0822	6.21136	6.89894	7.13947	7.17791	6.75119	6.67466	6.24101	5.7845	6.70569	6.26348	7.47547	7.53948	6.13614	6.38086	7.23557	7.25748	6.94575	6.36005	6.75283	6.05523	6.5155	6.11576	3.8073	7.22199	6.20276	6.69734	7.20057	7.38087	7.12696	7.51575	6.62753	7.06859	7.52717
RASAL1	6.90298	6.98699	7.15617	6.77657	6.5202	6.39215	6.39195	6.50958	6.41635	6.62273	8.00595	8.20369	8.20731	6.8141	8.15554	8.45255	8.09858	8.31217	8.29824	7.07922	8.12611	7.91375	8.39202	8.4544	8.08792	8.2414	8.29045	7.93188	8.36688	8.40792	8.33131	8.54873	8.39763	8.41471	8.32059	8.21916	8.44354	8.27247	4.87903	8.80045	8.68654	6.65284	8.24496	8.24938	8.41999	8.57062	8.16933	8.25925	8.3877
CHST14	6.93626	7.11865	6.68773	6.54064	6.82417	7.18471	6.91401	6.94784	7.13617	7.33966	9.35909	8.91615	8.67294	9.24331	9.07774	9.15831	9.95187	8.89724	8.56305	9.31943	9.07958	9.19498	8.93046	9.92438	9.17645	9.22982	8.74833	8.88923	9.80924	9.06796	8.81665	8.9794	8.80627	8.70991	8.89579	10.0442	9.56284	9.9693	4.83473	9.29299	9.01563	9.14731	8.91992	8.77014	8.89366	8.58899	8.73357	8.92374	8.83314
CENPF	8.22939	8.41432	8.29277	7.87615	5.97633	5.6149	5.94074	6.49245	6.85888	5.64704	9.47485	9.42001	8.92184	8.57804	9.59849	9.14753	8.95279	9.64939	8.89594	11.108	9.57592	8.75133	7.94753	10.1769	8.00138	10.9099	8.91045	8.90969	8.91977	9.56635	7.64327	8.92969	9.00356	8.02821	9.5742	10.5882	10.6942	8.09197	6.32267	8.89698	8.74061	8.60251	9.14566	8.25589	8.93905	8.6524	8.72354	8.83189	9.35603
RACGAP1	7.89468	7.28911	8.03108	6.68104	8.41014	8.02538	8.09119	8.05724	7.96311	7.8145	9.76001	9.42357	8.94426	9.37073	10.5925	9.63228	9.00987	10.2491	9.13281	10.4215	9.53066	8.48181	7.98053	9.74163	8.61095	10.6585	9.18236	8.62449	9.3046	9.62435	8.59827	8.62298	9.42028	8.38182	10.6988	10.2364	10.511	9.80265	7.63769	9.28168	9.3627	8.90733	9.4974	8.26949	9.18662	8.70819	9.09009	9.0343	9.45311
STIL	7.15566	7.54982	7.64521	6.56009	6.20457	6.02169	6.41502	6.23644	6.54641	6.33045	8.81872	8.52164	8.00742	7.94201	8.61741	8.53237	9.10014	9.24023	8.26936	9.5943	7.97477	8.27233	7.51317	9.32233	8.61045	8.9543	8.68507	7.84186	9.60543	8.70203	7.26037	7.44438	8.13433	7.29085	8.67255	8.50235	8.64738	9.11471	7.17149	7.8941	8.37998	8.63745	8.25017	6.66176	7.88426	7.89394	8.54677	7.74187	8.9888
ZFPM2	8.45491	9.5991	9.00559	9.60849	10.8119	10.9825	11.0352	11.0929	10.8451	10.9972	9.53972	5.30869	5.58605	8.61847	5.53907	7.05398	6.93347	6.39719	5.49146	8.42436	5.87544	6.26714	9.29931	7.75934	6.2562	8.66498	6.44658	6.49195	6.49644	5.51134	7.51203	6.60557	6.19081	10.4861	7.25575	6.75355	7.68299	5.45631	2.94842	5.34151	5.65357	7.83174	7.89461	5.86147	7.3542	8.41708	7.32225	8.75483	7.13568
MOAP1	8.3968	9.31934	8.67946	8.70357	10.0269	10.1954	9.93968	9.76531	10.0383	10.0974	11.619	11.6368	11.4771	11.2829	11.6236	11.818	11.9379	11.429	11.4947	12.1164	11.4883	11.6244	11.6702	11.8734	11.5296	11.7645	11.4405	11.5886	11.7854	11.678	11.5281	12.2638	11.4675	11.4813	11.6595	11.8001	11.8148	11.7817	9.38303	11.6693	11.3739	10.8531	11.397	11.3145	11.3189	11.335	11.226	11.4485	11.2383
DPH5	7.58848	8.18625	7.58974	7.64007	8.03645	8.15089	8.07665	7.65638	7.99549	8.30569	9.78963	10.164	10.0755	9.31565	9.95723	10.2731	9.91875	10.1313	10.0389	9.99005	10.026	9.95587	10.1476	10.1903	10.0091	10.2418	10.0777	9.85969	10.1232	10.2048	10.1217	10.2608	10.0482	10.1695	10.2753	9.95114	10.2705	10.0556	6.36899	10.0209	10.1089	8.64928	10.1747	10.0985	10.1328	10.2387	10.0817	10.0522	10.2328
HPSE	8.05911	8.19455	6.96059	8.6431	8.11461	8.14499	8.45903	8.04943	8.01371	7.684	6.64682	6.84568	7.1199	5.91878	6.80394	7.64052	7.75682	6.00771	7.09717	6.91983	6.54355	5.02906	5.74167	6.20615	7.78474	5.75105	5.94851	6.09196	5.57131	6.55666	7.65741	6.54691	6.18002	5.86232	6.5838	6.39299	6.37565	6.93936	6.25549	7.49261	6.73018	6.39287	7.2809	6.32928	7.51894	6.87184	7.38371	7.0765	5.77581
OR6B1	6.96228	6.70187	7.02497	6.70501	7.11104	7.05775	7.14531	6.8114	6.98177	6.9251	4.72939	5.26927	6.33021	5.04134	4.98494	5.52956	5.59297	4.77259	5.45791	5.20367	5.15141	5.07438	5.41975	5.65364	5.04325	5.19586	5.42485	5.73846	4.98182	5.67982	5.47343	6.01427	5.96096	5.60686	5.34389	4.97759	4.93187	5.36939	4.45249	5.75054	5.05677	5.61022	5.91444	5.95301	6.02516	7.48344	5.9866	5.15788	5.19584
STON2	7.5681	6.86866	7.4453	7.1403	5.90839	5.89875	6.67163	6.50072	5.56664	5.84571	8.16004	9.38428	8.01106	7.14594	7.43153	8.37742	7.83951	8.84457	8.0789	10.6862	8.99705	7.88727	7.24022	8.59016	7.29423	9.46119	9.20516	7.57852	7.38571	8.07998	8.03448	7.7402	8.22698	8.4526	8.55144	7.02564	8.74103	9.30728	6.5389	7.48536	7.48164	7.96988	8.7737	7.31346	8.12759	7.62608	7.87899	8.28658	8.17839
RPP40	9.22092	9.49911	9.18711	9.04722	6.73962	6.82728	6.93371	7.01703	7.47181	6.54402	9.10181	9.14802	9.29992	9.59553	9.40271	9.47834	8.51771	9.47512	9.27309	9.21927	9.24504	9.23776	8.87727	8.9932	9.29428	9.1865	9.43878	9.02651	9.35975	9.52581	9.20615	9.12247	9.22571	9.17906	9.15852	8.47413	9.4777	9.47313	6.78713	8.98265	8.89653	8.06702	9.46015	8.99596	9.33564	9.23363	9.24487	9.38201	9.35418
PARM1	8.14616	7.82713	7.50587	7.43361	7.4888	8.44612	6.71203	7.25604	8.36177	7.57393	6.60775	6.91176	7.3999	6.6037	7.20949	7.45872	6.8186	7.05975	7.21242	6.47108	6.89398	7.09649	6.80599	6.96976	7.0746	6.67302	7.59866	7.37097	6.65455	7.26742	7.62026	7.78507	7.60395	7.47987	7.373	7.11462	7.68324	7.09551	5.07285	7.4038	7.55703	6.6593	7.01795	7.69065	7.2355	7.84348	6.94813	7.14714	7.28269
CBLN1	9.01438	8.51455	9.10515	9.0421	6.27975	6.0896	5.9997	6.10682	6.0913	5.99982	5.35357	5.80369	6.26701	5.46431	6.12141	5.92298	5.53868	5.74212	5.76531	5.31485	5.55714	5.29879	6.16724	5.74396	5.54475	5.87657	5.7455	5.69397	5.32501	5.20832	5.50233	5.94316	6.04338	5.48133	5.74113	6.1838	5.58599	5.54619	3.45379	5.67764	6.14677	5.43821	5.68239	6.02949	5.82091	5.53405	5.93447	5.3497	5.74075
RP5-1027O15.1	6.58994	6.3519	6.67528	6.54814	5.68837	5.15381	5.77525	5.61229	5.51542	5.7062	3.36745	2.79242	3.78946	2.65231	3.41425	2.46412	3.62612	3.98857	3.82856	3.07945	2.67	3.43967	3.5327	3.4462	3.33905	3.01168	3.12222	3.33952	3.40717	4.101	3.62226	3.49785	5.01867	3.93356	3.70744	3.58136	4.01101	3.76879	3.08299	3.70542	3.82131	3.46003	3.67702	4.05747	3.44115	3.2359	3.49695	3.12735	3.03244
CDCA5	6.51231	5.90275	6.75738	5.63568	5.7062	4.52027	5.04478	5.7473	6.25082	5.79819	8.13635	8.06813	7.37326	7.49884	8.46049	7.77203	7.71131	9.0086	8.24189	9.72599	7.90101	6.86957	5.9638	7.71588	7.75476	8.52441	8.29596	7.47101	7.24773	8.20464	6.47102	7.9819	8.57809	5.82958	7.88903	8.40271	9.37402	9.30229	6.48078	7.81825	8.03165	6.62927	7.93496	6.19865	7.66074	7.22142	7.90883	7.43954	7.63499
TPH2	4.16645	3.33821	3.96191	3.64056	3.25354	2.348	2.91829	2.39393	2.65108	3.68348	5.61034	5.76831	5.90681	6.07263	5.63947	5.69366	5.68778	5.66252	6.08301	5.719	5.84981	5.44991	5.40133	5.85303	5.89307	5.48256	5.52669	6.16867	5.69782	5.50241	5.69025	5.71004	5.48318	5.31511	5.63013	5.71464	5.6284	5.67739	2.30717	5.62854	5.64977	5.90512	5.90328	5.89854	6.12093	5.71664	6.01869	5.80793	5.69027
ITGA1	6.39517	6.82615	6.94239	7.26656	6.60196	7.525	7.10202	6.97133	7.71123	7.61155	5.55747	5.52383	6.04103	5.96699	5.76545	5.99762	7.07918	5.89078	5.00998	5.89291	5.13613	5.10033	4.75729	5.59193	7.22877	5.88535	5.45544	5.7517	5.17665	5.79445	5.86446	5.59438	5.62375	5.44427	6.42784	5.3335	5.42366	5.36685	4.8893	5.71562	5.94805	6.71431	5.88647	6.52351	5.7478	6.61152	6.87878	6.49362	5.12315
BEND3	6.5514	6.76452	7.1851	6.84069	7.43849	7.42847	7.27684	7.2298	7.35437	7.37893	8.32032	8.01011	7.98073	7.92324	7.99037	8.79807	7.46745	7.62503	7.7088	8.7902	7.93752	7.99539	7.63926	8.23887	7.72094	9.82578	8.28082	7.87362	7.37056	7.7413	7.51179	8.18359	8.08194	7.08598	7.96655	7.86999	8.72624	8.97561	6.18003	8.60071	7.91976	7.58812	8.39277	6.89532	8.17264	7.98405	7.42112	7.71297	8.13675
LXN	9.51014	10.3684	9.44972	9.51018	10.7553	10.3094	10.7302	10.937	10.6663	10.4048	9.84676	10.1658	9.93367	8.58966	9.44131	9.49751	9.06441	9.9872	9.53915	8.83698	9.7342	9.3146	9.36261	8.59111	9.43891	9.43999	9.48163	9.71273	9.48039	9.57852	9.55505	8.97753	9.65677	9.62746	9.63754	9.68477	8.67412	10.0235	5.43297	8.8777	9.32719	8.51279	9.47048	9.09175	9.14681	9.28556	9.91745	9.57078	9.42172
E2F8	6.64383	4.53819	6.65668	5.1927	5.80562	5.41525	5.21322	6.67577	6.79349	4.72133	7.83997	8.04029	8.59402	6.34355	6.97967	8.69758	8.10973	9.23123	7.47326	10.1228	7.59955	7.0474	6.01913	7.80723	6.48932	8.84228	8.07644	6.6439	8.17173	8.88682	6.81006	6.7875	7.9317	6.13973	8.27753	9.05113	8.52024	8.05023	7.36887	6.77885	8.38642	5.96226	7.62662	6.89241	7.75904	7.07911	8.34187	7.06669	7.80101
DGAT1	9.56636	9.3726	9.14746	9.08563	7.08415	6.32911	6.41264	7.15517	7.77647	6.786	9.63061	8.76486	8.85869	9.74856	8.92397	8.97519	9.02309	9.52052	8.90567	8.53451	8.85387	9.13963	8.79347	8.8352	9.12132	8.85338	9.11019	9.54645	9.31671	9.14705	8.69905	8.70413	8.96881	9.16049	8.54226	8.59632	8.88378	8.72321	7.51829	8.55593	8.30166	10.1556	9.04253	8.49591	8.55197	9.09192	9.55246	9.21057	9.20404
RFTN2	5.8552	6.72574	6.49106	6.44562	6.3748	6.58672	5.98814	5.838	5.37331	6.84186	4.83224	4.30243	6.06423	5.37431	4.82802	4.77361	5.25841	5.43898	4.75073	4.89166	4.43892	4.93012	5.08422	5.06138	5.94666	4.68578	4.99599	4.88469	5.29383	6.32442	5.07938	4.79953	5.25054	4.44139	4.56798	4.52216	4.52179	4.68231	3.33449	4.84643	5.08152	5.96078	5.3175	5.26458	5.1563	5.6961	4.21772	5.51058	4.66029
ZNF300P1	6.60707	7.00275	6.61913	6.16025	8.05864	8.74104	8.02667	7.64515	6.50164	7.29706	6.00382	5.50687	6.25204	6.21301	4.78592	4.98931	5.52561	5.17867	5.10406	6.52664	6.83402	5.06697	4.89398	5.48764	6.58122	4.90054	4.95506	5.52577	6.38312	7.31726	4.97151	5.45598	5.85936	5.14323	6.15705	5.52775	6.88072	5.01153	3.65853	6.2035	6.74961	5.87344	5.09337	6.30262	5.78207	5.94628	5.75588	5.48939	6.51352
NOD2	4.86117	4.40503	4.67324	4.47515	5.98062	5.12419	5.47689	5.03948	5.07145	5.00494	6.5628	7.46631	7.60876	5.57252	7.30055	7.63468	7.02698	7.27095	7.44531	6.38508	6.94577	6.98628	7.42008	6.75408	7.11735	6.9082	7.68726	7.24398	6.94428	7.49437	7.52464	7.50725	7.65272	7.79766	7.58562	7.56698	7.36025	6.68215	4.61361	7.64083	7.59804	5.73273	7.62215	7.57584	7.77862	7.77138	7.33174	7.23023	7.65412
HHIP	6.56351	6.5537	6.95801	6.93535	6.97272	7.09664	7.40129	8.26975	6.84541	5.57211	6.01742	6.16293	6.73855	5.77914	6.34721	6.32766	5.64007	6.51802	6.35588	5.35126	6.15657	6.31991	6.14457	5.6567	6.60092	5.57065	6.89425	6.59405	5.87613	6.52941	6.59476	5.83255	6.78983	6.62291	6.41042	5.45354	5.56671	5.18344	3.13574	5.77737	6.17432	5.81257	6.34022	6.67527	6.64506	6.89555	6.36483	6.60728	6.54412
DUSP23	9.25398	9.8514	9.17506	9.18984	8.53151	8.34465	8.68102	8.53115	8.85368	8.6025	10.5355	10.8074	10.7477	10.1344	10.9214	10.9371	11.3672	10.6206	10.7807	10.9405	10.9518	10.918	11.341	11.415	10.9147	11.3188	10.7157	10.7556	10.9057	10.877	10.8364	11.2248	10.9424	10.8462	10.93	11.3556	11.1821	11.2736	5.63204	11.4807	11.4614	10.3106	11.0425	11.1186	10.7554	11.2781	11.0504	11.0819	10.8214
DYRK2	7.33462	7.19333	7.32721	6.91386	7.7408	7.6992	7.76429	7.73999	7.7769	7.59345	8.7231	8.41459	8.03311	8.28132	8.20264	8.69996	8.41769	8.02868	8.37995	9.33078	8.90209	8.63185	8.29921	8.76901	8.58077	9.30199	8.56292	8.06451	8.68526	7.90287	8.17764	8.18828	8.22546	7.5581	8.42564	8.68384	8.90763	8.39567	6.20958	8.78683	7.39329	7.79193	7.90535	7.6566	8.11651	7.70342	7.78491	8.41389	8.74878
CSPP1	6.60145	6.07479	6.65273	6.58689	6.92441	7.65086	7.71854	7.2189	7.04642	6.74649	8.35785	8.49557	8.4382	7.61238	8.1932	8.09131	7.83589	8.7802	8.65253	8.64043	8.87235	8.618	8.83057	8.58482	8.40418	8.71689	8.656	8.42899	8.26911	8.47649	8.51403	8.42285	8.40556	8.62638	8.32396	7.37991	8.0183	8.41595	5.98891	8.11354	7.96098	7.91071	8.70881	8.33563	9.24233	8.46351	8.79185	8.54122	9.02867
CSF2RB	8.66178	6.23518	6.74369	6.40502	9.11397	7.8673	8.94482	8.0626	7.91676	7.34041	6.8764	6.69954	5.39241	5.82426	6.34028	6.756	6.17522	5.32581	5.68697	5.76213	5.09795	5.33651	5.3187	6.79924	6.24381	5.2537	5.32516	6.15644	4.70502	5.38174	6.38342	6.38471	5.74418	4.82425	6.45683	5.75568	5.3841	7.56243	4.74224	6.48668	6.51372	6.24003	5.05397	5.57174	5.15266	7.08844	6.44049	7.27489	5.36807
RGS2	7.69291	7.96192	9.10156	9.94501	10.3255	9.7694	10.341	9.55212	9.03633	9.70083	7.43746	8.39525	6.55967	7.10051	6.55293	8.6166	7.07272	6.47022	6.89035	7.96229	6.89074	7.31788	6.22966	7.65104	7.95403	6.95642	7.32694	7.52942	5.91369	7.13994	7.23785	7.73839	7.72035	6.04787	6.81955	8.13285	7.34562	7.56852	9.41881	6.43929	6.40532	7.91949	6.13361	8.20211	8.07082	8.83912	8.40129	8.83451	6.88261
EPB41L4A-AS2	7.72316	7.59358	7.80737	7.90031	6.54428	6.55302	6.54773	6.34953	6.44239	6.39962	5.34106	5.62361	5.63943	5.7946	5.37443	5.55996	5.777	4.92262	5.32701	5.23861	5.85911	5.49618	5.49374	5.57591	5.33152	5.18676	5.99634	5.64649	4.80566	5.25396	5.88251	5.3822	5.44754	5.68669	5.38624	5.22443	4.99455	4.95687	2.07926	5.67478	5.25039	5.52994	5.13327	5.35896	5.01055	5.47138	5.05386	5.29446	5.23798
PRC1	7.23739	6.14759	7.33308	6.17821	6.23663	6.28229	5.98477	6.64598	7.44593	6.17691	9.75946	9.33064	8.44536	7.27997	9.57889	9.09724	9.09323	9.47249	9.12016	9.0034	8.30282	7.8713	6.86154	10.974	8.64359	9.20074	9.06146	7.76959	8.70124	8.88723	7.3691	8.0568	8.88999	6.98505	8.87663	9.70382	9.55513	8.96882	6.96822	9.0007	8.60884	7.00536	8.65279	6.27936	8.44052	7.65877	8.95176	8.11362	9.02626
KIT	7.87169	8.37967	7.97069	7.862	8.69859	9.54255	7.62305	5.82004	6.44768	9.2525	5.62784	5.92773	5.92391	5.42264	5.9496	5.54705	6.70655	5.5339	5.60328	5.79343	6.58987	5.72836	5.62947	6.91634	6.83024	7.2992	6.63767	5.89218	6.28396	5.55529	5.8592	6.28221	5.91021	6.31268	5.25695	5.47862	7.86049	5.30974	5.47183	5.45992	5.73938	6.9479	5.94335	5.90313	5.75176	5.70014	5.36857	5.30244	5.51716
HN1L	8.50748	8.65067	8.83749	8.60802	9.09979	9.06738	9.17397	8.88136	9.45384	9.02759	10.6957	10.138	9.15977	10.0088	9.64922	9.16011	9.92766	9.83554	9.48853	11.0781	9.2125	9.84612	9.20659	10.0609	9.8685	9.89367	9.26988	9.34714	10.4425	9.39549	9.061	9.61018	9.08902	9.07734	9.37489	11.1602	10.2495	10.6537	9.70696	9.52614	9.32096	10.1749	9.66343	8.77489	9.09898	8.68508	9.4643	9.1852	9.07688
GIPC1	9.47357	9.58291	9.31842	9.39588	8.47038	8.63607	8.45691	8.51677	8.73038	8.55505	10.057	9.67961	9.53928	9.88913	9.99703	9.39445	10.428	10.0109	9.98567	9.71512	9.79636	10.3777	9.27781	10.0155	9.87266	9.8771	9.47793	9.88066	9.94908	10.0137	9.4909	9.61138	9.59057	9.84288	9.91411	10.606	10.0729	10.3203	8.33433	10.0784	8.93715	10.5359	9.69185	9.38277	9.6947	9.29207	9.90227	9.67737	9.59868
CNTN4	7.27941	6.99802	7.15493	7.28406	7.73308	8.32851	7.05497	7.93644	8.03859	7.97716	5.85182	6.23739	7.05479	6.28001	6.28906	6.73031	6.1996	6.02363	5.82929	5.79271	6.84405	6.26179	6.25051	6.13846	6.30844	7.75184	7.07296	6.76817	5.7627	6.30591	6.89103	6.48952	7.50065	6.5845	6.24276	6.15249	5.90953	5.74545	3.09762	5.97069	5.46792	6.08112	5.82297	6.60044	7.45407	7.40449	6.11362	6.19651	6.64818
TTK	5.75963	4.52848	6.62625	4.89295	4.87395	4.71957	4.30567	5.38077	5.23444	4.5336	7.43429	7.84852	7.88657	6.8	9.10934	8.74247	6.66351	8.65023	8.56184	8.51008	8.53702	7.22629	4.56381	9.65219	7.05708	8.89244	8.19431	8.06705	7.33521	8.85779	6.57357	7.05651	8.76279	4.76496	9.39711	9.30506	8.38308	9.38889	5.2841	7.57197	8.00858	6.46671	8.3823	5.18502	8.59477	6.22652	7.54581	7.80558	7.84146
HDX	7.01224	6.65117	6.42896	6.57572	6.45768	7.3128	7.61445	7.50184	7.31773	6.88672	5.57122	4.53308	4.64895	4.63455	4.92422	5.1767	5.06709	3.81821	5.39876	5.89969	5.26041	3.99445	4.29905	5.15594	5.36835	5.13284	4.36057	4.6411	5.49927	4.81794	5.42723	4.57129	5.41629	4.89887	5.21085	5.14235	5.44917	5.27321	5.70948	4.63702	4.52329	4.64876	5.06054	4.87195	4.73069	4.42491	5.2167	4.68622	3.99293
PRICKLE2	7.06276	9.09316	7.98296	8.21211	9.64406	10.0135	9.47638	10.2818	9.5749	10.0806	7.13974	8.17626	7.13239	7.1339	6.40883	6.96899	6.83867	6.67585	6.86693	6.68341	6.62531	6.2311	8.1691	6.12724	7.48124	6.84351	6.64338	7.04755	6.03961	6.98184	7.0793	6.85099	7.24642	7.49937	6.78182	6.68621	6.69581	7.32851	6.11848	6.19035	6.30294	7.80915	6.57118	6.29166	6.93059	7.29339	7.08584	7.87657	7.08058
TSTA3	7.74737	7.88433	7.95802	7.67026	8.04309	8.08049	8.43766	8.14839	8.5399	8.15822	10.5056	9.2793	9.20223	10.3609	8.57727	9.10595	10.2216	9.12281	8.67	8.51258	8.74635	9.39551	9.12834	9.64953	9.03092	8.88857	9.03082	8.84199	9.41691	9.36475	8.49496	8.35095	9.16528	8.34677	8.2452	9.07436	8.60138	9.64554	8.36913	8.0271	8.21784	10.7268	8.52679	8.31378	8.09637	8.9611	10.1689	8.93804	8.94836
C10orf54	7.66006	7.90627	7.66834	7.89157	9.108	8.96011	8.94895	8.86211	8.68675	8.66935	7.00242	7.05682	7.53515	6.03374	6.93236	6.72411	9.12821	6.53746	6.99116	6.08895	6.23648	6.35017	7.39928	6.57767	7.1077	6.25439	6.92477	7.02721	6.11761	7.1385	7.49799	7.07564	7.45366	7.08652	7.25299	7.2095	6.88304	7.31822	5.45833	8.09617	7.8483	6.91554	7.0618	6.92676	7.26631	7.55557	7.19148	7.31757	7.00912
CNKSR2	5.69791	5.90179	6.0672	6.80352	6.71563	6.97227	7.35092	6.91956	6.43604	6.7266	5.48288	5.55991	5.75714	6.05847	5.45014	5.3501	5.16863	5.28912	5.36877	5.70145	5.97731	5.49531	5.14156	5.49499	5.26372	5.93677	6.14104	5.75431	5.66089	5.78199	5.57522	6.42627	5.7167	6.31327	5.88388	5.63552	5.52135	5.2142	2.29953	5.46046	5.78083	5.88797	5.50431	5.90434	6.09882	6.15862	5.65826	5.82744	6.1852
HIST1H2AJ	6.73972	7.51998	6.54356	5.9806	5.76823	5.12581	5.4579	5.78767	5.4828	5.41598	8.48085	7.77756	8.08302	8.70087	7.74388	7.999	7.6661	8.46365	7.4153	8.25216	7.52946	7.4752	8.06664	8.22159	7.50678	7.88455	7.83345	7.85547	7.93935	8.03258	7.58883	7.91005	8.02749	8.03392	7.7006	9.40049	8.47641	8.68926	0.269647	7.7787	7.54882	8.0191	7.66026	7.7305	7.82467	7.85904	7.76732	7.45574	7.95336
CEP55	7.01274	4.00469	6.57046	4.52345	6.12949	3.98913	5.68717	5.65758	6.76174	4.33427	9.25956	8.45772	7.69503	8.02104	9.65845	8.74666	9.50253	9.24704	8.86658	11.2145	7.38319	8.58643	5.55767	10.6267	8.42837	9.56163	8.91656	8.79814	7.59621	8.62777	5.75673	7.79649	8.8975	5.07438	9.52441	10.1015	9.20764	9.6547	6.19322	8.84098	7.37657	5.06443	8.35966	6.6393	8.01131	7.67985	8.11871	8.03115	9.00546
MRPL42	9.34317	9.45293	9.47026	9.15113	7.63236	7.42068	7.68138	7.6307	7.64827	7.59078	9.62568	9.53276	9.38138	9.0704	9.45921	9.60394	9.49074	9.51726	9.62157	9.52033	9.35855	9.51947	9.29562	9.39414	9.51217	9.72761	9.78806	9.55434	9.65606	9.30943	9.53453	9.43396	9.43212	9.36024	9.75391	9.57178	9.80657	10.1957	6.22139	9.34766	9.44379	8.88725	9.50701	9.35947	9.5777	9.15198	9.36321	9.35539	9.15108
DDR2	7.61014	7.90634	7.62159	7.80492	8.12806	8.4188	8.28321	8.25441	7.52644	8.08824	7.25916	7.34568	7.65043	7.20406	7.47477	7.53225	7.23471	7.49282	7.4915	7.18748	7.41997	7.34299	7.17588	7.13604	7.61305	7.30939	7.88684	7.74631	6.9545	7.58858	7.78516	7.24492	7.84127	7.80052	7.58796	6.7724	7.02944	6.78192	4.07988	7.14143	7.38236	7.44528	7.55892	7.7964	7.62796	7.65502	7.31999	7.92203	7.51666
AXL	8.99569	9.88489	9.2039	9.47055	7.99561	6.84461	6.98056	8.27402	7.88686	7.80693	7.02086	7.12724	7.47793	6.50117	7.04511	7.53575	7.09574	7.19661	7.17135	6.86619	7.35443	7.42714	7.54552	7.37325	7.33442	7.52945	6.78721	7.09559	6.67317	7.38468	7.50612	7.15785	7.51126	7.40466	7.49843	6.99068	7.14592	6.87323	4.83506	7.32291	7.88011	6.36487	7.16305	7.58218	7.17152	7.65202	7.40833	7.48529	7.43932
OVOL2	6.84869	6.54671	7.34904	6.9699	6.568	6.64911	6.82157	6.66104	6.98858	7.58401	7.40274	7.05819	7.40528	7.59733	7.36508	8.21949	7.37191	7.56096	7.23896	7.26133	6.76885	7.98041	7.39476	7.74674	7.10495	7.84095	7.38772	6.86075	7.27053	7.57466	7.59704	7.41968	7.24276	6.86709	7.51991	7.17672	7.73358	8.34883	6.96311	8.1431	7.34668	8.75942	7.6215	7.27257	7.0307	6.6791	7.03399	7.0992	7.17162
FRMD6-AS1	5.92092	5.7994	6.01395	6.17216	7.13253	7.25712	7.25647	6.6079	6.37453	6.41258	4.6693	4.79476	4.19747	4.65365	4.85186	3.63051	5.4704	4.76299	4.43166	4.5221	4.27645	4.66687	4.81874	4.31148	4.75165	4.90664	4.32	4.79894	4.82924	4.61578	4.5661	3.88194	4.45031	5.47318	4.50447	4.4213	4.16877	4.36511	4.54493	4.33968	5.56958	5.07173	4.48214	4.74024	4.43549	4.59169	5.14049	5.08408	4.42743
SPOCK3	6.07118	7.88685	6.07984	6.67599	5.56381	7.23479	5.40635	5.39199	6.28329	7.79194	5.02012	4.77152	4.83142	5.568	5.11356	4.7509	4.44612	4.91885	4.59905	6.02066	7.48062	4.82767	4.87561	5.68648	4.62273	8.10876	5.03415	4.75189	4.62336	5.55521	4.44465	5.95829	5.78015	5.15875	4.31713	4.53286	4.66109	4.33786	3.30117	4.04435	4.66942	4.31775	4.65946	4.40765	4.13729	4.8474	3.85702	4.0521	3.84804
TMEM139	7.09534	7.14142	7.28096	6.73772	6.65448	6.66967	6.94112	6.43215	6.74554	6.95342	9.68922	8.41105	9.22078	8.93826	8.61805	8.74675	9.80519	8.55135	9.38684	8.34662	9.48272	9.82738	9.69543	9.44147	8.80748	9.48772	9.09215	8.30069	9.27152	9.02813	8.87053	8.65452	8.45238	10.0158	8.84621	10.0339	7.80483	8.43974	7.95157	8.03062	7.0103	9.9066	8.71892	8.84986	8.64771	8.42289	8.70624	8.29397	8.6132
LOC101928995	7.66586	6.72568	7.10335	7.02365	5.34303	4.80858	5.18619	5.38692	5.49291	5.48911	4.85539	3.31409	3.81757	4.21932	5.27418	3.24189	3.74578	4.58467	3.92109	3.09477	4.2523	3.7628	3.93866	3.74176	4.21256	4.24427	3.87363	3.8258	4.21985	4.27218	4.11627	4.93445	3.72851	4.78379	3.51585	3.83937	3.87874	2.81095	0.870321	4.17162	3.89813	4.27122	4.3612	4.25134	3.82665	4.53595	2.85739	5.25675	4.81235
LINC00857	9.44486	10.4962	9.87988	9.9681	7.2618	7.05079	6.9623	7.36343	7.0227	7.39184	6.66638	6.75714	5.96461	6.13495	6.40973	6.15057	7.24272	6.33164	6.45708	5.61061	5.78179	6.52885	5.76613	5.79961	6.45265	5.79298	6.07919	6.47532	5.93368	5.38619	6.22537	5.82658	6.26642	5.9015	5.93011	5.81788	6.20611	6.40573	4.49824	6.39743	5.37806	6.27971	6.32409	5.97656	6.25589	5.92102	5.49297	6.44924	5.67305
ARMC3	4.37072	4.65546	5.00275	4.44198	4.56817	6.54089	4.07151	3.73435	4.74414	5.18187	8.66163	8.79826	9.03945	8.45536	8.2225	8.37679	7.55866	8.37165	8.94637	7.00623	8.71743	8.86994	8.87539	8.61342	9.12729	7.85476	9.3535	8.4925	7.85328	9.11038	8.96664	8.52796	9.21745	9.03817	8.70901	7.42066	8.36668	7.2269	1.42475	8.39455	8.48221	7.45759	8.34814	9.06955	8.69723	9.18442	8.16737	8.88608	9.09107
AOC4P	4.88436	4.24269	4.41117	4.66527	4.30691	3.90675	4.23899	4.31725	3.96857	4.17112	5.58689	5.339	5.63182	5.55951	5.8427	5.15664	5.51792	5.8561	5.62147	5.16202	5.64215	5.79176	5.63116	5.58955	5.70622	5.63996	5.54288	5.96397	5.6071	5.65077	6.21536	5.95269	6.01159	5.66119	5.49836	5.60723	5.94306	5.53994	2.80496	5.90879	6.2608	5.89345	5.71754	6.52913	5.79132	6.69443	5.61618	5.3616	5.91292
PJA2	9.33987	9.33437	8.61056	9.156	9.76297	9.97109	10.1175	9.86194	10.3807	10.0902	8.42982	8.79742	7.5842	7.79873	7.39464	7.87714	9.35862	7.96184	8.26794	9.99065	8.51254	8.80522	9.11648	8.84049	8.92205	9.05365	7.8132	6.84482	9.70327	8.18462	8.34642	7.34727	7.53822	8.94119	7.86657	7.96717	7.63567	7.95444	7.41226	7.64678	7.64994	9.07563	8.13822	8.09785	7.94857	6.78351	8.30864	8.54393	7.59429
MCTP2	7.55147	7.31351	7.35651	7.53798	9.28708	8.6649	9.54684	9.24769	8.16273	8.46316	7.39783	6.65544	6.83833	6.40012	6.41728	6.76631	7.35406	6.38534	6.77297	6.24375	6.4385	7.01377	6.62934	6.11089	7.37707	6.20607	7.06729	6.93996	6.76984	7.22284	7.27036	6.84001	7.20907	7.69482	6.76399	6.5695	6.75702	6.21711	5.62975	6.64834	6.85904	6.6717	6.70638	7.32099	7.55108	7.04592	7.91703	7.4292	6.81419
OXLD1	9.04231	9.57577	8.95707	8.97311	8.21592	7.93389	8.1984	8.28578	8.39873	8.22956	9.21337	9.27361	9.12079	9.4929	8.97183	9.35336	9.16552	9.22452	8.90951	9.01602	8.7872	9.00661	9.15568	10.1003	8.67579	9.11633	9.0911	8.49416	8.9876	9.02454	9.30669	9.07851	8.92974	9.01634	9.40668	9.9589	9.55412	10.2932	7.21227	8.94182	9.30721	8.4307	9.46601	9.17364	9.01339	9.22935	9.36656	9.14295	9.67924
PYCRL	7.18697	6.97943	6.92257	7.03735	6.25012	6.03832	6.52057	6.42763	6.71813	6.13906	7.40858	7.2772	7.49919	8.28386	6.48572	7.64723	6.86944	6.92145	7.31492	6.33319	6.70736	7.39494	6.88369	7.00109	6.8951	7.06225	7.15008	7.02792	7.05296	7.05202	7.63723	7.77234	8.36066	7.19197	7.61725	7.47748	6.60014	7.53966	6.24085	6.76623	7.1238	8.81141	7.7291	7.65955	7.92233	8.00835	7.71316	8.12702	7.13236
GNAQ	8.90534	9.334	8.48928	8.53442	9.08591	9.02315	8.8948	8.73999	8.63626	8.74271	10.2299	10.249	10.2046	9.75752	9.98577	10.0892	11.0956	10.1263	10.1174	10.2931	10.135	10.1798	10.1957	10.1691	10.3078	10.2095	10.0765	9.9941	9.94103	10.2078	10.148	9.89363	10.2245	10.3356	10.354	10.6908	9.82124	10.1861	7.16808	9.94964	9.7698	9.84298	9.53229	9.35195	9.53571	9.69303	9.955	9.63204	9.71618
SSB	8.67388	8.17056	8.41918	8.65786	8.37373	8.95442	9.26676	9.17876	8.79256	8.58268	10.3162	9.91851	9.07731	10.8756	10.0743	9.49566	10.307	9.4653	9.36731	11.3984	9.80938	9.61762	9.59898	10.4873	9.15939	10.2288	9.20202	9.2424	10.65	9.67862	9.07347	9.02591	9.34851	9.1264	9.60369	10.3266	10.1152	11.3101	9.27652	9.06866	9.09976	10.0212	9.60754	8.85284	9.35356	8.10386	9.51097	9.14716	9.57016
ECM2	8.58611	8.87751	8.43325	8.60708	8.48056	8.8913	9.42093	8.84508	7.83632	8.29354	7.79706	7.93049	8.228	7.02655	8.05593	8.0581	7.89909	8.10423	8.06696	7.09241	7.90657	8.06324	7.59351	7.65669	8.6587	7.57436	8.43474	8.43498	7.68695	8.12597	8.36765	8.14422	8.09922	8.00839	7.856	7.60468	7.84029	7.32796	2.35543	7.59102	8.16103	8.07723	8.04889	8.03094	7.87034	8.20098	7.98133	8.63569	8.0089
TSPAN17	7.36914	6.95547	7.05503	6.93452	6.96748	7.04138	6.87503	7.33374	7.88049	7.273	7.76731	8.09275	7.65299	8.29602	7.62315	7.82577	8.79008	8.56903	7.78806	8.6734	7.84424	8.08709	7.71789	7.74523	8.36145	7.98548	8.15406	8.20771	7.85341	7.82612	7.56824	7.91793	7.69586	7.66307	7.77041	7.92563	7.68237	8.92909	6.96213	7.29545	7.73849	8.98044	7.74218	7.3721	7.53277	8.08104	8.56998	7.78907	8.01584
SCN1B	10.2267	10.9637	10.1448	10.2656	8.6938	9.00049	7.61474	8.84741	9.52383	8.23812	6.95631	7.59235	8.16588	6.85548	7.96295	8.13493	7.58979	8.08251	7.7698	7.12117	7.38678	7.7353	7.69184	7.18686	8.13623	6.54409	8.07653	8.34572	7.25195	7.86167	8.40616	8.26467	8.70128	8.14952	8.28116	7.89644	8.22441	7.50855	6.28781	8.64402	8.88338	7.22869	8.35274	8.69342	8.51616	9.08626	8.30575	8.68209	8.4901
NFIA-AS2	6.07924	6.44514	6.25691	6.22191	3.16071	2.71135	2.90662	3.19552	3.1607	3.17527	8.66158	8.96378	8.9603	7.80099	8.84216	8.9798	8.84618	8.86725	8.95361	8.58344	8.85568	8.92166	8.88721	8.84044	8.80864	8.75718	8.92653	8.94964	8.85331	9.33188	8.91858	8.8736	8.92958	9.00006	8.98333	8.87233	8.98595	8.82039	6.93424	8.8032	8.91091	7.59557	8.92998	8.89519	8.8732	8.91945	8.90357	8.85177	8.94905
LOC100129476	8.07973	8.19817	8.36131	8.19389	7.3399	7.15542	7.41974	7.44953	7.2652	7.57315	5.31454	5.23469	5.57611	5.22669	5.76514	5.13893	5.31887	5.51775	5.41192	4.94859	5.05596	5.3135	6.14121	5.43761	5.35505	5.25857	5.56803	5.63369	5.40434	5.02486	5.18066	5.44745	5.31713	5.43525	4.81567	5.79271	5.6876	5.61942	3.46955	5.94014	6.46878	5.49984	5.85628	6.37744	6.59671	6.90745	5.42152	5.24146	5.93979
PRKAR2B	8.64843	9.85695	8.59479	9.01509	9.62961	10.3262	9.42341	9.2562	9.64211	9.80924	5.61742	7.952	8.63179	8.16452	6.64694	6.92688	6.60129	7.77914	5.78834	8.01316	8.1928	6.65954	6.16951	5.62051	5.6594	8.32134	6.58443	5.72357	6.15029	5.71764	5.90783	7.30095	6.63635	8.66739	6.3538	7.1715	7.6292	7.24657	7.55939	5.51862	8.28185	10.3975	7.14618	5.31376	5.94675	6.66504	6.61324	7.06461	7.46529
RP11-215H22.1	5.70401	5.53462	5.33529	6.35807	6.35206	6.55577	7.60011	7.44265	6.48863	6.35907	6.22906	5.97374	6.03775	6.44159	6.11277	6.03338	5.52925	5.88323	6.14819	5.95711	6.2626	6.02996	5.4138	5.12596	5.79517	5.63879	6.09445	5.89588	5.72427	5.89598	5.70589	5.31652	5.92907	5.38598	5.60911	5.43107	5.42538	5.45156	4.51373	5.18588	5.2734	5.81036	4.97387	5.52699	5.63794	5.44788	5.71937	5.6049	5.43997
TPI1	9.79706	10.0302	9.49589	9.3541	10.3499	10.0083	10.2111	10.1763	10.6069	10.1712	12.0177	11.4332	10.9621	11.3372	10.3369	10.8436	11.606	11.2606	10.8112	11.7354	11.1172	10.636	10.7858	11.9529	11.0926	11.8627	10.5507	11.1863	11.8044	10.8056	9.69918	10.7426	10.4762	10.1824	11.0109	12.2462	11.4366	11.9033	10.5776	11.0168	10.3903	10.8831	10.547	9.88468	10.447	9.75132	10.314	9.90675	10.306
ZNF611	8.72667	8.62108	8.61083	8.69585	8.84343	8.97619	8.7534	8.80464	8.98172	8.98335	11.2826	10.4104	9.28439	11.2698	10.7497	9.93706	11.8857	10.5263	9.87915	12.1215	10.8272	10.3885	10.6345	11.1917	10.173	11.3098	8.98349	10.6236	11.2536	10.499	9.32035	10.8569	9.95758	10.6972	10.7291	11.501	11.3718	11.8644	9.01165	10.6841	11.7196	12.0539	10.3076	8.79518	9.59016	9.16831	10.8504	10.0979	9.79755
NR3C2	6.93399	7.88291	7.54106	7.43496	8.47578	8.72791	8.50645	8.12879	7.61804	8.42993	6.79823	7.92901	6.6058	6.86017	6.57229	7.02527	6.44425	6.33251	6.30263	7.58098	7.09277	6.74774	7.43271	6.72289	6.43377	6.53696	7.09	6.56386	6.48948	6.49321	7.3133	7.12721	6.59878	7.92505	7.00061	7.02081	6.33904	6.72744	4.9842	7.82323	7.31116	7.62203	6.60108	6.41558	6.13017	7.30908	6.81413	7.1981	6.71248
ANGPTL1	6.51138	6.96926	6.93327	6.74886	7.93187	8.29462	7.9647	8.05454	7.21265	7.52706	4.91753	4.89954	5.40922	5.19468	4.92676	5.3656	5.06075	5.02344	5.15955	4.82847	5.40364	5.04224	5.0675	5.01722	4.98396	5.17859	5.03722	5.54938	7.31702	5.00664	5.51225	5.37318	5.41522	6.50081	5.48497	5.24168	5.69282	4.99877	2.98928	5.38181	6.08036	5.24583	5.50114	5.48695	6.08517	6.65819	5.74042	6.22286	7.56906
NIF3L1	8.34588	8.86601	8.55287	8.50681	9.13406	9.33197	9.16257	9.06826	9.28442	9.12555	10.1896	10.0332	9.21379	10.55	10.3792	10.262	10.5459	10.0364	9.80122	11.1263	9.47455	9.61336	9.8826	10.1909	9.73139	10.4167	9.67461	9.26879	10.4255	9.53889	9.04929	9.13477	9.49085	9.1459	9.96998	9.95246	10.1108	10.3793	10.841	10.0976	8.65484	10.0707	9.88122	9.00227	9.64826	8.95312	8.9327	9.36307	9.6022
WDR34	9.9623	10.8943	10.0996	10.202	7.1449	7.45962	7.40416	7.49049	7.90487	7.6545	9.65502	10.0573	10.1182	8.41438	9.89562	10.1988	9.95107	9.69317	9.88251	8.88328	10.3122	10.2101	10.2708	10.725	9.88305	10.0012	10.2348	9.62625	9.89014	10.3021	10.4131	10.3435	10.3028	9.8762	10.0205	10.5515	10.0819	9.84071	8.23528	10.138	10.2089	8.71738	9.7809	9.96533	9.74914	9.98919	9.74427	9.74999	9.90007
LOC101927018	5.13277	5.50913	5.51175	5.77522	5.69086	6.0155	5.65693	5.49024	5.16152	5.55377	4.52031	4.15157	3.91017	4.68157	4.53209	3.08788	3.03491	4.50846	4.54057	3.43787	3.77847	4.34984	3.13379	2.19905	3.88159	3.33219	4.35108	4.25843	3.17485	3.17092	3.94441	3.12993	2.30379	2.75626	3.2875	2.78565	2.344	2.86511	2.44699	3.42773	3.52581	3.79535	4.07718	4.2915	4.25582	3.67693	2.87071	3.83349	3.82636
CAPSL	4.84244	5.03331	5.09266	4.85938	5.12409	6.37053	4.60244	4.86906	4.81369	5.38335	10.7949	10.2671	10.194	9.86627	10.3809	9.67171	9.80538	10.4876	10.0722	9.72758	10.044	9.92573	10.0865	9.80519	10.1181	9.48504	9.65499	11.1134	10.1712	10.118	9.81152	9.75099	9.95641	10.2581	9.93269	9.615	9.87638	9.57495	0.339402	9.31463	9.5928	9.20242	9.66384	9.28711	9.76398	9.17358	10.0909	10.053	9.69992
RASIP1	10.31	11.2578	10.4163	10.3158	8.58866	7.4231	8.19769	8.42576	7.36163	8.22346	4.99218	7.57512	7.40384	5.41299	7.64952	5.87544	6.55714	5.87296	4.78385	5.45672	5.11712	5.88143	5.42581	6.36622	6.81474	5.72381	5.8878	6.03794	5.23966	7.7689	5.13274	6.64572	7.37186	6.20025	5.66256	7.09527	5.29826	5.30714	5.66939	6.23061	6.67631	6.63708	5.99856	6.5542	6.74259	8.6405	6.49072	7.2609	7.70673
SYT1	7.19617	7.13551	6.24481	7.22385	7.31432	7.45516	6.05016	6.96875	8.05159	6.48135	5.56927	5.7462	6.10229	5.72196	5.84552	6.136	5.83754	6.59101	5.69217	6.51178	6.54711	5.47936	5.29995	5.51815	6.71661	5.82122	6.4209	6.08129	5.66101	5.58373	6.03307	5.75388	6.20915	6.22323	6.47754	6.32198	5.86078	5.96371	3.11472	5.79146	6.56534	7.19387	6.72083	6.35594	6.54014	6.51491	5.69512	5.6802	6.16937
MOP-1	7.06361	6.59351	6.68031	6.36522	5.41517	4.71665	5.22427	5.6184	5.34904	5.70319	3.73491	3.83585	4.487	5.02287	4.56187	3.7342	3.29212	4.19844	3.81382	3.45852	3.80711	4.20619	3.6245	3.99065	4.10084	3.73775	5.44309	3.84175	3.69998	4.58913	4.44568	3.09211	4.72525	5.05902	3.93869	3.53517	3.82636	3.16411	2.29582	4.47441	3.22015	3.51061	3.93502	4.98711	4.46217	4.25274	4.00908	4.69071	3.53011
CAV1	9.49291	10.9922	9.21753	10.0789	12.1828	11.953	12.2945	11.7416	11.3624	11.7941	9.16106	8.05158	9.08907	9.57902	7.69219	8.0373	10.21	9.27398	7.60587	8.2324	8.2167	8.41211	9.58704	9.60061	9.58783	7.19791	8.14574	8.28345	7.25937	8.40856	8.37122	7.98975	8.3385	10.7118	9.14884	7.68953	6.93096	6.9665	5.53072	7.05377	7.95734	9.92876	7.7669	8.31929	9.29122	8.44335	8.15206	9.0264	6.99451
TNFAIP2	9.34751	10.0235	9.22996	9.09383	8.26864	7.35567	7.63303	7.86732	7.82555	7.94312	10.1886	9.60506	9.50624	9.5584	9.82517	9.49073	10.4853	9.69047	9.55278	9.70591	9.38255	9.56927	9.86846	9.73089	9.55665	9.87471	9.5005	9.76778	9.70247	9.53638	9.25842	9.66996	9.42902	9.5218	9.56776	10.3694	9.5327	9.88441	6.8773	9.81217	9.52573	9.32683	9.8088	9.62591	9.63565	9.89326	9.95097	9.7384	9.76521
MTX1	8.87316	10.8322	10.3021	9.94429	7.97687	7.89692	7.93047	7.99723	7.66772	7.98058	9.91526	10.311	10.2765	9.75068	9.96476	10.3723	9.88326	10.1556	10.1638	9.22249	10.1506	10.3069	10.1247	10.0933	10.112	10.2453	10.2485	9.84159	9.93832	10.2903	10.1951	10.0103	10.4494	10.1594	10.1567	10.0079	10.5671	10.384	7.10926	10.4265	10.225	8.4262	10.2728	10.1797	10.2315	10.4417	9.87645	9.97776	10.272
TBC1D2B	7.46875	8.60383	7.75579	7.79971	9.44134	9.20913	9.41815	9.15877	8.86495	9.00895	7.89823	7.21318	7.20244	6.91758	6.61496	7.43105	8.20937	6.85427	7.38475	7.0245	6.76151	7.13021	7.56502	6.62489	7.75868	6.92749	7.49429	7.26046	6.65816	7.48665	7.63507	7.4018	7.54843	7.64971	7.23261	7.64835	6.80206	7.64289	6.21405	7.0525	7.93962	8.54387	7.50772	7.18649	7.4413	7.59565	7.78646	7.87235	7.46875
UBE2C	7.18786	7.18942	8.01364	7.29752	6.58032	6.27494	6.63301	6.61567	6.90968	6.33458	8.71021	8.95761	8.44687	7.88959	9.57971	8.79243	7.90681	10.0876	9.02063	10.1362	9.03481	8.15194	7.12298	8.86549	7.99742	9.39195	9.17882	8.57163	7.93963	9.45467	7.67549	8.41505	9.55298	7.90166	9.44836	8.69057	10.672	8.31597	8.29297	8.40081	8.03665	7.90569	8.39404	7.28684	8.46233	7.95856	8.90736	8.65002	8.98495
RBM4	6.90104	7.11904	7.25194	6.95669	7.13848	7.42771	7.84474	7.1978	6.58696	7.24061	8.85582	9.3319	9.13205	7.40608	9.29721	9.5496	9.32411	9.365	9.29349	8.47948	9.17121	8.79364	8.8025	9.20398	8.93318	9.29489	9.04606	9.13191	8.98952	9.55908	9.51083	9.41059	9.12889	9.37065	9.37706	9.47567	9.25623	9.32647	7.03937	9.44115	9.50541	7.35413	9.4537	9.32928	9.4426	9.50633	9.44922	9.34208	9.17962
PEA15	9.45318	10.1222	9.37983	9.39083	9.76681	9.46647	9.72528	9.80362	9.40052	9.55706	11.5187	10.5097	10.4338	11.2786	10.3542	11.2541	11.498	10.6367	10.3293	11.6501	10.635	10.9773	10.5647	10.7163	10.3216	10.6119	10.1401	10.5792	10.9844	10.4091	10.06	10.72	10.3149	10.1472	10.5744	11.2798	10.4735	11.7661	10.0123	10.4229	10.3284	11.2124	10.4618	10.1334	10.3437	10.0294	10.7591	10.457	10.3917
PIGW	7.27157	7.6805	7.16204	7.08723	8.06427	8.19978	8.32092	8.00178	8.23884	7.26274	8.43592	8.61396	7.6694	9.25999	8.91151	7.83146	8.88688	8.59122	8.46766	9.87577	8.84117	8.32268	8.05084	9.67178	8.77961	8.97629	9.00127	8.08516	8.39459	8.18612	8.71495	8.48474	7.66519	7.10392	8.51593	8.82578	9.24707	9.18684	7.85318	8.82214	7.82927	9.4342	9.48632	8.33118	8.12077	8.33438	7.81587	7.25617	8.35253
HAGLR	5.25642	5.61234	5.30992	5.3732	5.26233	5.32101	4.18583	4.78398	5.36683	4.9927	8.86065	8.86812	8.98554	8.46288	9.13512	9.18893	8.85701	9.28077	9.19138	8.81506	8.78047	8.70422	8.66427	9.06425	9.07867	8.5288	8.98094	9.54392	8.7381	8.99561	9.23748	9.07001	8.97083	8.90636	8.893	9.27447	8.96069	8.64063	5.73008	8.9626	9.02859	7.49222	9.22001	8.95541	9.2623	9.07441	9.07426	9.0421	9.10188
TLE4	7.63571	8.1334	7.40594	7.47867	8.52989	9.00611	8.72363	8.0591	8.56532	9.08365	5.80226	6.89295	5.3195	6.16455	5.92268	6.21424	6.34495	5.99399	8.14349	5.75742	5.38142	5.51494	5.70855	7.82654	7.45614	5.61264	6.27202	6.95663	4.93274	6.79723	6.00663	6.42125	7.32254	5.44825	7.50411	4.90649	6.67773	4.94054	5.85033	5.19518	5.63519	8.32036	6.37054	5.4117	6.09309	7.20967	6.97517	6.9198	5.4656
NUDT15	7.44915	7.94089	7.9249	7.78294	8.67976	8.67371	8.51386	8.56213	8.83861	8.61123	9.42759	9.31162	8.62915	8.6429	9.57595	8.76454	8.92023	9.47485	9.72408	10.2051	8.70477	9.6221	8.96157	9.51504	9.63893	10.1012	8.75657	8.70347	9.75965	9.73186	8.32333	9.11258	9.38146	9.31361	8.83242	9.28234	9.8431	9.326	8.87953	9.54479	8.413	10.2132	9.20415	7.29824	9.17088	8.3438	8.98665	8.81829	8.45264
LOC339666	5.21677	4.81177	5.19495	4.7906	3.87172	3.711	3.80672	3.53939	3.62784	4.08388	7.14718	8.00561	7.99102	6.13669	7.73282	7.4631	7.3268	7.78058	7.98135	6.85455	7.68671	7.92676	7.55032	7.17341	7.77675	7.35263	8.1706	7.7269	7.40764	7.80143	8.20455	7.87908	8.0446	7.80921	7.84396	7.05943	7.4068	7.21304	7.99632	7.61236	7.49503	6.63383	8.20703	8.25868	8.22363	8.3489	7.58379	8.10402	8.31644
ALDH1A3	7.90307	9.00218	7.4485	8.1915	10.0092	9.79365	10.2598	9.78983	9.69184	7.45161	7.4153	9.61966	7.80047	7.69577	7.62419	7.74216	7.46677	7.72178	7.59789	7.35507	7.57466	7.73162	7.69634	7.52417	7.48215	7.31591	7.91888	7.68442	7.38726	7.67418	7.96457	7.59048	7.82785	7.88224	7.74908	7.54191	7.74737	7.96766	4.82557	7.73076	8.04333	7.94318	7.88782	8.09268	7.89146	8.03071	7.62506	8.13708	7.86622
BYSL	6.64417	6.82942	7.09784	6.54497	6.64022	6.40907	6.57409	6.33506	6.72044	6.47864	7.27579	7.01948	7.8356	7.93661	7.01499	7.58445	7.19559	7.9993	6.97891	7.79467	7.32477	7.35302	7.08139	8.18737	7.24825	8.31954	7.84329	7.14324	7.80932	7.49833	7.57287	8.08962	7.46949	7.08798	7.71395	7.025	10.8929	7.69513	6.99649	7.00035	6.651	7.32028	7.75744	7.73418	7.68997	7.55028	7.28739	7.88089	7.0003
HSPBP1	7.36668	7.52619	8.14141	7.94038	7.28527	7.3093	7.21327	7.3688	7.1187	7.4915	7.6786	7.96035	8.47387	8.42383	8.36871	8.16374	7.80832	8.33137	7.85945	7.94095	8.31884	8.30896	7.91237	7.72261	8.07478	8.63468	8.71971	8.25339	7.81794	8.48351	8.0893	8.67171	8.6225	8.29595	8.31452	8.09343	8.70462	9.22911	6.72195	8.265	7.98075	7.70235	7.97954	8.1646	8.3144	8.12075	7.83704	8.25679	8.65412
RAPGEF4	7.12671	5.9676	6.66515	6.13495	6.0381	6.88381	6.02757	6.52241	6.82069	6.70482	4.7686	4.90298	4.8803	6.02816	4.3572	5.86638	5.69815	5.46401	3.58739	5.96461	5.23915	4.05605	5.55214	4.33057	5.61605	5.46786	4.68601	4.87363	5.55543	5.1418	4.85177	4.10268	5.73871	4.30483	6.0356	4.29488	6.42063	5.09612	3.83929	3.76305	4.34704	5.23197	3.74748	5.42451	4.40049	5.48067	6.17784	6.01164	4.91295
CCDC64	7.90493	8.55686	8.06702	8.466	9.65724	9.55714	9.28621	9.27714	9.24858	8.99419	7.35883	8.1733	8.04574	6.07445	8.22815	8.17586	8.0614	7.81725	8.30789	7.17166	8.17764	8.42527	8.2777	8.16442	8.13916	8.25149	8.28871	7.9051	8.16423	8.32292	8.31275	8.14644	8.29477	8.10289	8.14528	8.55052	8.1094	8.08526	3.74272	8.54381	8.55243	6.43894	8.1505	8.21156	8.05403	8.01612	7.87159	8.14922	7.90963
PRKCD	6.47281	5.57937	6.11941	5.71866	6.83029	5.80643	5.79539	5.72582	5.93842	6.12631	6.92042	7.29849	6.86525	7.0841	7.64368	7.70178	6.77675	6.43918	6.08827	7.23012	7.00097	6.84198	7.11903	6.82826	6.34161	7.32792	6.64984	6.39659	6.5896	6.90116	6.93837	6.80715	7.85297	7.11422	7.50043	6.90211	6.28078	7.22246	5.77394	6.97243	6.6228	6.54346	6.67712	6.63691	5.97177	5.95952	7.54688	7.02615	6.23993
HIST1H2BD	8.78488	9.98217	9.2218	9.04508	8.45723	7.94306	8.11806	8.58724	7.98139	8.30748	10.742	9.68136	9.50893	9.73703	9.78493	9.85579	9.99424	9.43614	9.60293	8.87905	8.90144	9.29559	9.57854	10.7724	9.56639	9.50921	9.4849	9.1944	10.0978	9.66719	9.70501	10.2873	9.35951	10.1805	9.43472	10.2946	10.0933	10.4108	8.90473	9.71737	9.81191	10.8581	9.52987	9.08511	9.45041	8.99702	9.0507	9.18068	9.45861
CORO2B	6.68481	7.31328	6.69966	7.22451	6.89614	7.86099	7.94938	7.23122	7.27572	7.9953	5.60447	7.67727	6.66117	6.36213	5.38694	6.23332	6.07793	6.09079	6.16021	6.25039	6.24293	6.05525	6.65118	5.75741	6.10256	6.09054	6.39853	6.22076	6.03997	5.53799	6.14123	6.78898	6.08528	8.17032	6.63664	6.14641	6.05805	5.69389	4.96881	6.00183	6.62334	5.80974	6.30787	6.44782	6.11688	6.34511	5.83521	6.89135	5.9879
DHRS13	8.55616	8.47989	9.31162	9.01877	7.35859	7.16577	7.22598	7.22904	7.1389	7.17289	8.70054	9.09067	9.18298	7.94143	8.6603	8.82586	8.66537	9.19361	8.65454	8.87801	8.9069	8.719	8.74172	8.7141	8.5789	9.20375	9.31595	8.82861	9.0288	9.45195	8.90539	8.90937	9.67706	9.22063	9.0415	9.99735	9.31444	9.03758	6.38929	8.97033	8.85802	7.87906	9.80017	8.89978	8.74093	9.00101	8.4612	8.95001	9.13354
PRSS2	5.2991	5.34088	5.45535	5.09771	4.9739	4.46239	4.70431	4.55784	4.63728	4.86801	6.24658	7.52339	7.27078	7.82892	6.986	7.05531	7.27508	10.3473	8.32684	5.78972	9.06065	5.54327	5.24892	9.13145	6.32782	7.02238	9.25096	7.51003	6.08645	8.03652	5.8092	6.64047	6.93183	8.28196	8.0761	6.39138	8.39249	6.41027	3.84472	9.3809	7.92714	5.88688	6.84228	8.98483	7.17398	6.08335	7.11371	6.2985	8.35577
CDC45	6.41717	5.8932	6.46852	6.07846	5.44309	4.8645	5.30898	5.4997	5.35845	5.36295	6.53089	7.39035	7.9095	6.56437	6.56237	7.6939	6.52602	6.76441	7.38718	7.41903	6.48092	6.59777	6.73628	7.63288	6.66687	7.28761	7.24863	6.87252	6.1744	7.41575	6.92512	7.07687	7.43699	7.11061	7.50814	6.65159	7.37555	6.79878	4.47842	6.96701	7.16737	6.27007	6.80448	6.84761	6.94186	7.07454	6.81388	6.33399	7.30452
SASS6	6.48953	5.51731	6.65209	6.43857	6.43573	7.00756	7.2492	7.04507	6.61959	6.5992	7.73858	8.01581	7.32769	7.35318	7.81973	8.6475	6.44293	8.23902	8.21195	8.96647	7.62057	7.61375	6.10725	8.54872	7.53393	8.44269	7.82819	7.59058	8.24349	8.2436	7.62481	7.55715	7.84646	7.00085	8.61671	7.31248	8.68857	8.07258	6.5967	7.67652	7.10821	7.59307	7.9784	6.86808	8.35248	7.06018	7.78693	7.47122	8.50142
BC040734	5.45472	5.70397	6.44047	6.1414	6.99797	7.13616	6.83267	6.60475	6.72416	6.63731	3.66266	4.34603	4.22525	4.54198	3.97744	4.70988	4.5157	4.8051	4.6994	4.78335	5.07254	4.58243	4.40757	4.54235	4.53076	3.95682	4.7967	4.7802	4.02912	4.5966	4.28408	4.51812	4.35297	4.47099	4.35289	4.78806	3.89545	4.19826	2.30518	4.28475	4.55372	4.60688	4.2222	4.53874	4.53645	5.66404	4.55828	4.8083	4.45952
NOG	4.79295	4.49851	4.85382	4.54308	3.9651	2.97306	4.53455	4.05433	3.75155	3.77927	6.0308	6.07415	7.69704	6.2546	6.34492	7.00139	6.43945	6.19865	5.70336	5.83215	7.05597	6.98105	6.28875	6.69274	6.44658	5.88432	6.8172	7.74907	6.06117	6.6252	7.53028	7.18419	6.99317	7.63912	6.32907	7.12192	7.97032	6.51833	4.09736	6.66237	6.82418	5.6621	5.83542	6.63487	6.49372	7.28175	6.26086	7.80627	6.40155
FAM83D	6.4402	6.03074	7.76652	5.94449	5.03873	4.88216	5.83511	6.06052	6.81873	4.6972	8.48204	9.06018	8.42165	7.60208	9.13514	9.26336	9.55354	9.80614	8.82641	10.2921	9.61912	7.72411	6.22158	9.64912	7.12264	10.163	8.87141	8.12463	8.20434	8.84087	6.76905	8.29087	9.4984	6.64626	9.15861	9.38389	10.087	8.85641	6.6796	8.23933	8.3794	7.19471	8.64809	7.05075	8.24272	7.10163	8.58419	8.06871	8.35279
DDX49	7.38548	7.39066	7.21584	7.22059	7.69809	7.72146	7.77288	7.80093	8.13866	7.86578	7.90434	8.2366	8.02908	9.16643	8.09971	8.03613	8.43859	8.36448	8.69344	8.94764	8.40091	8.34545	7.52195	8.63449	8.17205	8.34119	8.09466	8.1053	8.82987	9.05804	7.89722	8.14073	8.41793	8.11449	8.77071	9.11412	8.94262	8.65501	7.30896	8.27676	8.09609	8.07603	8.3324	8.05466	8.83372	8.09973	8.54684	8.0169	8.62334
ENDOG	6.36288	6.30695	6.37085	5.86299	7.02069	7.0476	7.16719	7.07569	6.9748	6.64881	7.75747	7.6539	7.74377	7.91379	8.06833	7.34897	7.34665	7.54518	7.04561	8.15755	7.4186	6.33001	7.43856	7.87391	6.81698	6.93701	6.90542	7.10077	6.89999	7.79374	7.70435	8.16779	7.37135	7.54615	6.93454	8.3442	7.32822	8.52262	7.158	8.1168	7.03898	7.1317	7.25985	7.05602	6.71444	6.94442	7.72226	7.23744	6.63686
DSCAML1	7.7386	7.96486	8.03409	8.0611	7.12776	7.02073	6.75361	6.69696	6.78942	7.01303	5.58454	6.22931	6.58028	5.64028	6.2611	6.85222	5.88451	6.22745	6.36919	5.65011	5.68806	5.9646	6.23075	6.09439	6.05985	5.74869	6.62024	6.48145	5.9652	6.40157	6.7302	6.96169	6.52121	6.39295	6.43482	5.85196	6.21253	6.1446	2.29649	6.08217	6.54477	5.3871	6.86768	6.83875	6.69651	6.91702	6.43763	6.37579	6.69049
PDCD4	5.50895	4.81721	5.0717	4.88973	4.38445	5.43827	5.72902	4.82674	5.04897	5.37706	3.5878	4.16294	3.51425	4.59985	4.22633	4.46445	3.4263	3.91337	4.05962	5.15563	5.18553	4.76146	4.27128	4.50072	3.4622	5.1628	4.50653	3.27579	4.00474	3.57399	4.40876	3.01241	3.83418	4.3169	4.26131	4.25017	4.13806	4.22484	4.37054	4.54854	4.35201	3.11512	3.28772	2.58419	4.07071	2.71613	3.92364	3.65176	3.77722
HN1	7.88615	8.01832	8.29664	8.11518	7.51497	6.94135	7.29686	7.37604	7.79765	7.20747	9.1214	9.04058	8.59287	8.95168	8.37121	8.81442	8.93293	8.83566	7.9619	8.39773	8.2256	8.07246	8.13712	9.13472	7.9676	8.4856	8.8471	8.34096	7.8181	8.82374	8.42031	8.44881	8.75668	8.2134	8.7871	8.5736	9.20139	8.5841	5.87386	8.74382	8.2771	7.54989	8.22549	8.15433	8.23198	8.51987	8.24137	8.48319	8.32607
CELSR2	8.12772	7.48189	7.77247	7.54387	7.60003	9.33024	7.86442	7.89314	8.79289	8.39031	9.62309	7.1498	8.42102	9.93421	8.71594	9.14739	10.0677	9.34308	8.66508	10.4717	9.11613	9.13507	9.23723	9.48157	8.73806	9.15522	8.92507	8.44631	9.38996	8.94216	8.77229	8.56589	8.23703	8.66788	9.41846	8.94931	8.71567	9.59718	9.19079	9.33431	8.31781	9.24715	7.93783	8.37788	8.48981	7.44776	9.26185	8.75062	9.30711
TRIM47	9.22588	9.33557	9.03154	8.9796	7.53192	6.75573	7.00024	7.43976	7.5227	7.01041	9.98266	9.27599	9.01901	9.23104	9.31814	9.10149	9.12426	9.45296	9.37105	8.72781	8.87864	9.37329	8.82729	8.51903	9.17296	8.57171	9.36569	9.64766	9.02854	9.13852	9.18818	8.90218	9.06135	8.96145	8.87508	8.92619	8.80678	8.72052	7.05475	8.64434	8.45205	8.46023	9.1298	8.95147	9.03209	9.0988	9.22488	9.36759	9.44489
FZD7	9.47249	10.4589	9.36807	9.58037	10.1243	9.8045	10.1851	9.93388	10.1524	9.80166	8.3506	7.83716	8.69944	8.08828	7.74008	8.13844	9.38478	7.34481	6.58889	8.17202	8.4575	9.83626	8.35967	7.46549	7.92412	7.04219	8.295	8.36842	9.01926	7.12197	7.80486	7.17146	8.31324	8.15073	8.57481	9.4821	7.73957	7.32047	7.78525	6.69517	7.13647	5.6177	6.52463	7.38138	8.02031	7.78429	7.81731	8.42488	7.06571
C9orf85	6.89134	6.64565	6.87646	6.78263	5.97989	5.96045	6.14319	6.12284	5.82054	5.74727	9.11651	8.35533	7.7919	9.13275	8.71206	8.1016	9.5786	8.63311	8.13823	9.85407	8.65886	8.48675	8.76138	9.05391	8.36427	9.03473	7.72297	8.6075	9.14656	8.5155	7.79665	8.51006	8.0066	8.57465	8.51863	9.329	9.0185	9.56951	5.05407	8.5343	9.30974	9.73116	8.39568	7.62705	7.99048	7.71304	8.72744	8.13682	8.05108
TRIM6	7.36796	8.12096	7.25934	7.57162	8.04027	8.81205	8.65466	8.84444	8.55731	8.3486	6.60184	7.21891	6.20878	5.2974	5.50412	6.99858	7.4301	6.21892	5.95015	5.82664	5.38746	5.95527	6.13195	6.63637	7.26313	6.57058	5.48619	5.02732	6.71075	6.22805	6.26273	5.42497	5.65866	5.2372	8.16471	5.51053	6.14758	5.72829	5.54551	6.50133	6.68598	7.33298	7.71268	5.31915	8.303	7.12396	7.30255	6.84481	5.03249
CRAMP1L	9.94332	10.7708	9.9073	9.84342	8.62667	8.48023	8.03423	8.49856	8.11607	8.25252	8.18003	7.89794	7.755	8.30364	7.66711	7.92066	7.02637	8.12774	8.37013	8.04561	7.73536	8.24698	7.84529	6.97506	8.05147	7.50529	8.39192	8.01861	7.6706	7.56737	7.87905	7.92106	7.82692	8.21446	7.71906	7.21342	7.4801	6.75553	7.01001	7.30054	7.19049	7.68021	7.66557	7.75364	7.98584	8.25218	7.94021	8.03701	8.55146
CKS1B	8.54032	8.48677	8.49073	7.90668	8.83578	8.89711	9.12462	8.7373	8.9861	8.90526	10.4766	10.3259	9.51165	10.3253	10.2424	9.96966	10.1154	10.8086	9.80609	11.7208	10.0865	10.0463	9.64645	10.9842	10.0774	11.3104	9.74332	9.25942	10.3608	9.85997	8.8526	9.22549	9.36393	9.26584	9.86834	10.1054	11.1405	10.9295	7.71344	9.66649	9.20496	10.1007	10.0756	8.50961	9.0772	9.07666	9.92764	9.29094	9.4441
BMS1	8.31729	8.49607	8.24728	8.14986	8.77274	9.08546	9.13522	8.83537	9.31962	8.8642	10.1914	9.09574	8.78996	9.95786	9.06203	9.56713	9.90194	9.11703	8.97596	10.53	9.17576	9.32114	9.1605	9.84483	9.49509	10.1331	9.41638	8.71377	9.87263	8.47034	8.92554	9.07091	9.21099	9.18562	8.49173	9.66442	9.99558	9.89911	9.1215	9.19003	8.61876	10.531	9.4531	8.31561	9.09995	8.54443	9.3476	8.97142	9.02735
GLP1R	6.7518	6.29225	6.4466	6.28866	5.49385	5.20804	5.36454	5.38274	5.36681	5.45473	8.17188	8.09314	8.06994	7.47776	8.11981	8.01697	8.11655	8.18824	8.24574	8.02222	7.85023	8.08368	8.06821	8.0103	7.90139	7.78768	8.072	8.31028	7.93624	8.12723	8.12328	8.00218	8.18074	8.08221	8.14053	7.78527	7.89142	8.19679	7.05335	7.88956	8.04431	7.38998	8.0186	8.02439	8.09518	7.74874	7.78159	8.16363	7.78437
SFMBT1	6.90036	6.73974	7.21012	6.46999	6.73107	6.90658	7.07235	6.71666	7.11659	6.7443	7.30706	8.41316	7.74208	8.50588	8.26075	7.70222	8.18922	8.24113	6.93321	8.84883	8.53723	7.52051	7.2278	8.15588	7.8671	8.23551	7.83072	7.81555	7.81593	7.60355	7.35109	7.72945	7.91614	7.65419	8.06869	8.8836	8.17516	9.79801	7.93498	8.15684	7.10874	8.67833	7.79366	7.25636	7.71936	7.51329	7.8019	7.38563	7.80226
TLCD1	8.27577	8.5572	8.35376	8.2658	6.70645	5.75033	5.73275	6.11972	6.0819	6.21701	7.7999	8.53731	8.63922	7.20792	8.22649	8.09443	7.67503	8.54383	8.43166	7.41722	8.41018	8.4632	8.27537	8.29856	8.37641	7.95781	8.59633	8.29686	8.15623	8.61284	8.54752	8.10518	8.71033	8.39013	8.63434	8.29682	8.44697	8.04041	5.54709	8.29324	8.2362	7.09753	9.05597	8.62969	8.58085	8.67363	8.30665	8.44882	8.70184
NCAPH	6.1771	5.93007	6.7602	5.79441	5.90131	4.99821	5.13168	4.75441	5.66693	5.15695	7.31829	8.02654	7.1512	6.7336	7.70296	7.43541	6.7882	8.4926	7.54063	7.78209	7.35006	6.61069	5.95079	7.39356	6.88005	8.32179	7.65144	7.09881	7.1286	7.69728	6.48769	7.15106	7.99148	6.28915	8.63783	7.66998	8.37994	7.44915	4.23326	7.50049	7.14952	6.33018	7.29311	6.7878	7.5006	6.93788	7.58674	6.95377	7.53969
LRRC2	5.19612	4.66737	4.54961	4.501	7.10678	5.87336	7.04905	5.57571	5.27281	6.33404	3.67923	5.31299	4.8346	4.18571	3.76092	4.19355	4.07485	3.8682	3.65123	4.57685	4.5982	3.82033	4.30755	4.23888	4.17985	3.95332	3.90286	3.99262	4.04012	4.35299	4.75152	4.6178	4.52962	5.1243	4.08242	4.47286	4.23474	4.30328	2.58165	4.90316	4.96328	4.26353	3.99674	4.37024	4.19916	4.355	4.32918	4.07639	4.15523
CNDP2	9.68345	10.2569	9.75237	9.53405	9.09388	8.36127	8.14064	8.77445	8.76507	8.64062	11.0755	9.6982	9.3132	9.55311	9.79352	9.79198	10.1991	10.4708	9.6997	9.43992	9.41136	10.0689	9.90085	9.88311	9.81883	9.91645	9.60316	9.79126	10.3601	9.78487	9.43199	9.44993	9.41816	9.44886	9.81868	9.67017	9.47889	9.54808	8.22629	9.86828	9.71544	10.0443	10.0645	9.75694	9.69758	9.83078	9.92195	9.67553	10.021
CDK1	8.6489	9.4738	9.1642	8.52889	6.54855	5.8016	5.90286	7.00411	6.94999	6.28514	9.50526	9.45355	8.82753	8.15406	9.82769	9.2329	9.34221	9.3763	8.9287	9.57383	9.29747	8.95641	8.92403	9.71857	9.11452	9.73569	9.25629	9.18245	12.1911	8.98438	8.65495	8.85392	9.30217	8.82329	8.96191	9.77691	9.73338	9.46127	5.93633	9.20121	9.0988	7.93141	9.19808	8.77172	8.93449	9.21439	9.34821	8.95887	9.51994
SBK1	7.73333	8.03716	8.27221	7.98612	6.30832	6.37804	6.45603	6.46282	7.22198	6.71392	8.54686	8.17625	8.13908	9.125	8.19296	8.52758	7.55903	8.406	7.98685	9.6491	8.89974	8.87006	7.91479	8.91444	8.12929	9.43178	8.8643	8.42554	8.54981	8.15761	8.41793	8.78208	8.76065	8.53548	8.0432	8.41113	9.66064	8.28448	7.68568	8.06409	7.92828	7.64251	8.37907	7.82152	8.09535	8.21515	8.48408	8.43281	8.64285
RP5-1189K21.2	4.52435	3.32605	3.83214	3.79508	3.76795	2.89289	3.23647	3.13769	3.24291	3.82749	5.32425	5.04744	6.16146	5.7603	5.43056	4.95326	5.35106	4.80039	5.22465	4.99642	5.1208	5.40776	5.36826	5.58851	5.41367	4.79813	5.06092	5.9688	5.06785	5.21779	6.1061	4.82573	4.62794	5.46509	5.41211	4.81759	5.47071	4.77722	2.36264	5.98448	4.99243	5.35136	6.02502	5.06262	6.24642	5.3344	5.65402	6.12274	5.95333
LRIG1	8.18125	8.61708	8.58159	8.28846	7.59917	8.03665	7.53165	7.5672	7.72307	8.09945	9.99781	8.98538	7.78497	9.43834	9.53962	8.79474	8.678	8.03557	7.62992	11.1085	8.79457	9.53797	9.69706	9.12051	8.8564	10.9642	8.64355	9.36083	10.3083	8.57687	7.84877	8.09469	8.38914	8.12705	8.03404	9.86081	10.5671	9.76238	9.14658	8.08232	7.24203	9.39573	8.7388	7.30074	7.70596	8.23264	8.71252	8.49903	8.26393
SLC16A1	7.76673	7.89251	7.72866	8.1641	8.97862	8.90836	8.98454	9.23012	9.06654	8.58692	8.27609	7.30014	7.382	8.63286	6.96178	7.73474	6.70297	7.55229	7.06013	8.77575	7.60603	7.10216	6.78894	7.01963	6.88238	8.07105	8.33587	7.36915	6.71439	8.10156	7.66258	7.87149	7.70008	7.42526	7.12887	7.72536	10.0487	7.12849	6.65935	6.58007	7.29011	7.25908	7.79772	7.6424	7.68084	7.23201	7.28734	7.68756	7.9846
RAPH1	7.97088	7.34611	7.90466	7.84588	8.80324	8.31759	8.96808	8.85404	8.0282	7.82151	6.6661	7.7722	7.12051	6.50952	7.72932	7.50934	8.27926	6.31761	7.08631	6.67029	6.46385	7.23598	7.13235	7.33364	7.56983	6.77577	7.19649	7.51441	6.56594	7.06116	7.78208	6.97395	7.19075	6.27865	6.73417	7.38733	6.75098	6.90815	5.75657	7.12494	6.91958	8.98465	6.65812	7.115	6.54103	7.40063	7.07243	7.25117	7.34161
CX3CL1	6.44276	6.5202	7.71958	6.64566	6.06083	5.94014	5.91265	5.81262	5.7795	6.0065	8.35057	9.50514	7.85532	6.86217	7.59592	6.93202	8.59936	6.17215	8.17797	6.38546	6.99254	8.83801	7.12685	7.58814	7.51153	7.14724	7.06319	7.87102	7.73371	7.1798	7.92304	7.9196	7.95372	6.88642	8.01718	8.09823	6.76268	8.99774	7.7657	7.92311	7.77808	7.47159	7.69875	7.25064	7.70525	8.17026	7.88066	7.24664	7.43766
CHSY1	10.0491	10.7599	9.57053	9.65536	9.55246	9.09603	8.83428	9.23544	9.37233	8.92199	11.5673	10.9611	10.5194	11.3212	10.4525	10.9103	10.9579	10.799	10.5819	11.7204	10.7152	10.7433	10.3702	11.3105	10.9506	10.8396	10.0182	11.045	10.9799	10.4015	9.98709	10.3738	10.164	10.4682	10.2778	10.5933	11.1404	11.12	8.53224	10.1972	10.2327	11.2588	10.0164	9.57776	10.185	10.0282	10.6462	10.1845	10.1126
LINC00116	7.95168	7.78523	7.75622	7.52315	8.5677	9.05102	8.61334	8.65078	8.78316	8.98518	5.94114	6.29453	6.33783	5.69618	5.41682	6.20761	5.70565	5.54351	5.54917	5.59381	6.33051	6.09219	6.14181	5.33672	5.67892	5.82804	5.11618	5.73448	6.07577	5.90909	6.04601	5.73496	5.37427	5.4662	5.37004	5.83551	5.08397	5.77581	5.38913	6.28421	5.07269	5.94258	5.12818	5.20997	5.34569	5.81683	6.02597	5.41045	5.71273
DPY30	9.23586	9.49594	9.09395	9.03542	9.98688	10.1196	9.84683	9.8734	9.87006	9.88951	11.8575	10.7586	9.86276	11.0889	9.89881	10.2609	10.7339	10.5418	10.4144	11.3066	10.7226	10.5552	10.7225	11.4979	10.0298	11.6092	10.1374	9.4491	11.1493	10.0713	9.71915	9.3461	9.89735	10.0097	10.3715	11.9366	11.281	11.9172	9.95498	10.2578	10.3841	10.4878	10.2702	9.37367	9.52117	9.18768	10.3181	9.7161	9.89885
ECT2	6.6955	6.07168	6.86523	6.48984	6.69168	6.49483	6.62123	6.85199	7.06932	5.96654	7.62638	8.66697	7.47942	7.53218	9.3065	8.21827	9.1416	8.62163	8.62366	10.8868	8.54763	7.56473	7.19494	9.61501	8.0727	10.032	7.79912	7.92606	8.58196	8.129	7.42073	7.71005	7.73366	6.63161	8.26169	8.87364	8.93801	9.79658	7.05209	7.91408	7.59191	7.29913	8.0637	7.39626	7.71407	7.00589	8.03886	7.87608	7.65899
FDPS	9.18227	9.3523	8.93674	8.92724	9.64749	9.63445	9.8588	10.0806	10.2791	9.87594	11.3353	10.5331	9.68288	11.6765	10.4459	10.2227	11.0757	10.7365	10.0913	11.5242	10.9165	10.5937	10.5229	11.2597	10.3955	11.6278	10.1533	10.0454	11.0625	9.9927	9.35726	9.45482	9.44085	9.65746	9.73481	10.9108	10.5257	11.899	10.1453	10.1	9.43703	11.338	10.1288	9.34832	9.29161	9.42434	10.8594	9.55729	9.69416
MIP	5.12674	5.15715	5.25086	5.23955	4.78791	4.51831	4.9332	4.63081	4.80399	4.72215	7.20294	7.42037	7.57939	7.27971	7.53322	7.65332	7.31933	7.51337	7.54858	6.89224	7.28218	7.40202	7.33378	7.46598	7.34648	6.8734	7.74453	7.62096	7.2824	7.73594	7.64268	7.46541	7.7095	7.44616	7.44414	7.41819	7.24383	7.60135	4.24252	7.58442	7.2807	7.40481	7.43295	7.62395	7.63248	7.74886	7.33551	7.70889	7.40925
TFPI2	8.73862	9.33924	9.20609	9.2795	11.4276	11.2082	11.5041	11.626	10.6699	10.5254	9.14081	6.30938	5.29113	6.14712	7.34794	7.22135	11.5073	6.24912	5.78608	6.79339	6.34596	6.95675	5.65151	8.65439	7.51693	6.93112	9.00498	6.12068	8.32573	8.77283	7.94574	7.30442	8.20752	6.17939	9.04611	9.92584	5.21887	6.93034	3.67801	6.84678	5.21679	7.93219	6.97886	5.48769	8.76103	7.6609	7.90416	7.51008	7.66908
METTL7A	9.19973	9.77119	8.75518	8.94238	10.8735	10.6277	10.7397	10.7176	10.4886	10.7057	9.06301	8.04502	7.99832	9.15744	9.11005	8.24574	7.7037	7.87194	7.39599	8.94446	7.81821	6.87148	8.63206	8.29542	7.79849	8.96468	7.44385	7.37635	9.10722	7.42212	8.16187	7.7344	7.69445	8.52495	8.7927	9.67659	8.36644	7.54965	7.17647	8.38042	9.46648	7.89889	7.75519	7.71716	8.08224	7.64239	7.42611	8.62073	7.93345
RCC2	9.75555	9.9203	9.49783	9.35735	10.7436	10.6092	10.5422	10.5108	10.0199	10.6359	11.9661	11.3669	10.4847	11.6685	10.9771	11.38	11.9105	11.3906	11.0562	12.6898	10.9745	11.1093	10.6271	12.0234	11.2984	11.8771	10.3314	11.1442	12.2814	11.1692	10.062	11.3423	10.3085	10.3917	11.023	12.1547	12.2843	12.3397	11.2592	11.3553	10.4235	11.5083	10.7847	9.69538	10.6492	9.68424	11.2804	10.3373	10.085
PFDN2	8.8437	9.44235	8.9615	8.94628	9.63398	9.68509	9.52463	9.44791	9.83045	9.83134	11.0165	10.4227	9.47511	11.2111	10.3624	9.83265	10.4229	10.2193	9.75415	11.3463	10.18	10.3764	10.3711	11.2455	9.91327	11.2249	9.76776	9.77706	10.6405	10.2991	9.30023	9.53721	9.56118	9.89456	9.63203	10.7122	11.4101	11.5166	9.714	9.81553	9.21631	11.0253	9.80714	9.23914	9.6515	9.10538	9.93119	9.59339	9.40227
CACNA2D1	7.23591	7.32609	7.39447	7.89192	7.79886	8.31427	8.72122	8.49162	8.1794	8.25384	5.31914	6.59839	5.97865	6.39729	6.68012	5.64809	6.34022	5.32783	7.8244	5.38209	7.60192	5.70796	5.45805	6.31328	6.22104	5.27302	5.80749	6.78018	5.37751	5.301	6.20562	7.27226	5.64261	7.69731	7.65917	7.11401	6.23398	5.177	4.11029	5.30646	6.50525	7.0177	5.74982	5.81737	7.9425	6.69651	6.65935	6.84465	7.43253
ESCO2	5.32965	4.97552	5.28235	4.75659	4.01996	3.71625	4.01903	4.01675	3.99756	4.20765	6.62898	6.89632	6.70583	5.51608	7.12348	6.77276	6.52252	7.01841	6.72295	6.50074	6.54792	6.57615	6.2834	6.56215	6.62362	6.83924	7.03171	6.75162	6.6016	6.85567	6.84343	6.67635	6.80356	6.66489	6.64496	6.26614	6.28492	6.12395	3.73612	6.57121	6.73708	5.798	6.5888	6.31674	6.572	6.35136	6.66491	6.82676	6.67084
LIMK2	9.47355	10.1306	9.72376	9.34931	7.52817	7.98919	7.95502	7.95756	8.16501	8.46689	9.58539	9.85272	9.74543	9.86485	9.66096	9.98186	9.61383	9.36574	9.89213	10.935	9.55393	9.96117	9.69062	10.5239	10.0303	9.96514	9.83812	9.8509	9.39947	9.58079	9.65816	9.89067	9.43911	9.4328	10.0221	9.82013	9.41125	10.3362	7.98995	9.59264	9.44674	9.35041	9.92881	9.46183	9.68257	9.28537	9.44474	9.57947	9.7196
ASTN1	5.35996	5.998	5.50807	5.17077	5.84046	5.50947	4.9427	6.21012	6.41945	5.2761	5.13656	5.62431	5.54931	5.94846	5.80496	5.01976	5.36243	5.8108	5.23252	5.30487	5.40761	5.18507	4.87911	4.9371	6.26859	5.29069	5.29674	6.22834	5.40826	5.4509	5.55014	4.84709	5.21659	5.027	5.39811	5.03339	5.58406	4.94075	3.79018	5.56595	5.01472	5.53537	5.2222	5.27214	5.72352	6.11958	6.16948	5.37072	6.15662
FBLIM1	6.28189	6.81481	6.79887	6.35026	6.68268	7.23539	7.31087	7.38274	7.22309	7.2359	10.4504	9.9463	9.78907	9.98446	10.0488	9.91488	10.2892	10.0165	10.1223	10.3337	9.93176	10.1752	10.1196	10.1975	10.0222	10.116	9.6945	10.4637	9.99437	9.76515	9.76151	10.0444	9.64865	9.65313	9.87478	10.0541	10.0286	10.2317	5.13413	9.74196	10.0777	10.0972	10.0143	9.80555	10.0144	10.0242	10.0968	9.71275	9.88633
CEBPG	7.36286	6.81981	6.84856	6.82096	7.51056	6.97267	7.52399	7.04431	7.71244	7.03643	7.33256	9.09109	7.87378	8.07474	7.98825	7.85173	8.67493	9.39381	8.62649	8.4126	9.37487	8.51747	7.45719	8.91026	8.24311	8.27517	8.11675	7.25692	8.06887	7.9091	6.95948	8.01813	8.13993	7.48222	8.15008	7.39707	8.38879	7.90885	7.41959	7.55966	8.25355	8.54383	7.95597	9.03039	7.6018	6.92656	7.02883	7.5871	9.21808
C21orf15	6.50501	6.795	6.93441	6.95205	6.92126	6.55923	6.72405	6.64121	6.82715	6.64482	8.23506	7.68886	8.73134	7.56768	8.06051	8.58251	8.14301	7.94302	8.29971	7.65724	7.82449	8.03504	8.0521	8.44532	8.02359	7.88577	8.26568	8.25351	7.74899	7.93497	8.16994	7.94932	7.77277	8.00098	8.06528	8.15007	8.16	8.23392	4.03664	8.31027	8.22631	7.97083	8.24636	8.46017	8.38432	8.69955	7.88861	8.08533	8.23668
RBM8A	7.96999	8.18491	7.93808	7.93311	8.24245	8.49199	8.01205	8.08864	8.8535	8.50076	10.4834	10.3555	10.1836	10.1649	10.2615	10.1518	10.3035	10.8663	10.1475	10.3563	10.3103	10.1944	10.1192	10.2938	10.0378	10.8311	10.2039	9.92505	10.481	10.3715	10.0366	10.0924	10.0793	10.1561	10.1188	10.1335	10.5222	10.6866	7.50717	10.0931	10.2222	9.60637	10.0908	10.0218	10.0806	9.89982	10.2255	10.2058	10.2776
LIMA1	7.47684	7.73715	7.63067	7.96744	9.23624	9.39816	9.59585	9.68945	9.39587	8.55998	7.32947	6.68575	7.16528	6.84952	7.65618	7.16466	7.95623	6.60752	6.87717	7.16448	6.93284	7.33088	7.11277	6.94919	7.53244	7.17497	7.15737	7.0936	7.10824	7.14506	7.4449	6.98357	7.4157	7.01212	7.97233	7.40122	6.99069	6.72394	4.86577	7.20344	7.09892	7.54281	6.82838	7.38547	7.24698	6.87291	7.28947	7.80448	6.88512
ITGAM	10.3058	6.81065	7.24906	6.24297	10.9803	9.21695	10.0321	8.4662	9.39575	7.55601	6.69629	7.43736	6.96774	6.2366	6.49783	7.75255	6.91632	5.94435	6.78623	6.77456	5.64508	6.30545	6.39631	6.84641	7.00958	5.91061	6.42013	7.04399	6.08537	6.32711	6.77721	7.29008	7.82952	5.35167	6.4674	6.00517	6.17677	7.56475	5.67436	6.45541	6.96813	7.28702	6.31416	6.65637	6.80174	7.51729	6.87105	8.23688	6.03853
C12orf56	5.07883	5.07434	5.85178	4.83447	5.0408	4.13382	4.45391	4.18597	4.3061	4.27269	4.86372	7.31522	5.48864	7.09875	6.54926	7.95016	5.08885	6.44391	6.30873	6.6764	7.3221	7.66593	6.37705	6.45292	7.59513	6.5744	6.45297	6.45723	7.81594	5.7101	8.25507	5.90033	6.89858	6.84644	7.28379	7.11972	5.51224	6.08384	3.58503	7.28484	6.52872	5.67494	7.46795	6.26444	6.62651	6.90915	6.60605	6.51127	7.78359
ZNF165	4.1982	5.36192	5.89552	5.4886	5.27377	5.90641	5.98377	5.45594	5.96883	5.66774	7.48222	6.73717	5.64038	6.9759	8.1866	6.5722	6.07636	7.19761	6.52761	6.94464	6.24345	6.90165	6.23278	7.20212	6.29469	6.80217	6.75773	5.65969	7.29233	7.03846	6.14004	6.86221	6.76582	6.9987	6.49489	5.43816	7.42248	7.28691	3.49807	7.13583	7.39548	6.81956	7.1649	6.31438	6.88467	6.50695	6.45524	6.25769	7.03006
KIF15	5.62307	5.06037	5.48688	4.7635	5.30559	4.81006	5.39975	5.64713	5.14815	4.48131	6.75659	7.64515	5.62705	6.23086	7.54285	7.90079	6.86451	7.81637	5.77609	8.67401	7.99592	5.88845	5.29988	7.36536	5.88564	8.51687	7.31502	6.68519	6.48573	7.30451	5.72783	6.58234	7.88088	6.03009	7.78026	7.70502	8.2876	6.51271	5.54057	7.31565	7.27759	5.76877	6.96716	6.08557	6.85055	6.12643	8.01605	6.42809	7.6872
NDUFB9	10.0458	10.3627	9.70601	9.82936	10.754	10.5779	10.7747	10.7401	10.9565	10.7069	12.3921	12.1939	10.6154	12.681	10.5598	12.5449	12.6683	12.1514	11.34	13.1777	10.9273	11.9832	10.7746	12.7547	11.5149	12.4767	10.9814	10.4965	11.5612	11.0845	10.903	10.994	11.1312	11.1287	11.0598	13.142	12.388	13.2537	12.0243	11.7795	10.9057	12.97	10.8687	9.94945	9.64893	10.6079	11.1211	10.5896	10.3607
PSME4	7.75571	7.21658	7.52029	7.53732	8.25482	8.41171	8.38818	8.24703	8.47943	8.09859	9.29923	8.97468	7.88989	9.0635	8.25448	8.55862	9.3162	8.67987	8.49889	9.84943	8.73849	9.2637	8.25938	9.02773	8.42539	9.35334	8.38516	7.86387	9.08774	8.70243	8.33452	8.09645	8.20598	8.16802	8.34908	8.79658	9.29066	9.97047	8.22092	8.32419	8.19943	8.97627	8.3866	7.78244	7.76903	7.99299	8.7554	8.18847	8.02965
SLITRK5	5.5136	5.63237	6.48969	5.96621	7.36275	7.90744	9.09408	7.65427	6.4969	7.12936	4.26344	4.92902	5.43999	4.28467	4.4579	4.4737	4.68887	4.73601	4.49434	4.65885	7.26666	4.48076	6.95877	4.88958	5.14611	6.21091	4.70328	4.85067	4.76956	4.85764	4.44794	4.94524	5.30429	8.24716	4.68178	4.57151	5.30437	4.8901	1.17958	4.95946	4.81875	5.32013	4.73441	5.13986	5.77556	5.27755	5.09916	5.18244	6.57321
ELL3	5.55975	5.51844	5.78825	5.50792	6.25174	5.86986	6.57795	5.85547	5.83913	5.96847	10.2922	10.6375	10.6061	9.08471	10.4762	10.2372	9.59109	10.5574	10.4961	9.29847	10.3948	10.3371	10.0553	9.65656	10.3696	9.92996	10.5993	10.4821	10.2089	10.6232	10.7453	9.87193	10.5127	10.583	10.0831	9.73357	9.90607	9.7146	8.26019	9.68536	9.64921	8.21825	10.1673	10.1747	10.1888	9.77269	10.0871	10.2748	10.1282
MOGS	7.01536	7.00267	7.09576	7.23323	7.87435	7.78878	7.78534	7.78728	7.80827	7.86362	8.06449	7.90885	7.93457	8.68709	7.8081	7.76082	8.28127	8.19881	8.24009	8.52274	7.37751	8.28334	7.90898	8.57252	7.68297	8.46805	7.82697	8.02526	8.14045	7.93596	7.77937	7.92234	7.771	8.19859	8.24805	8.64184	8.48627	8.36271	6.09837	8.32831	7.73334	8.51317	8.19907	8.21538	7.81995	7.5635	8.27249	8.22984	7.97277
CDC25A	5.39373	5.61546	6.19267	5.65991	5.60973	5.48618	5.68352	5.31072	5.663	5.77142	7.1111	6.86682	6.03521	6.1722	6.81042	6.48604	6.8718	7.12872	6.11291	7.67214	7.24631	5.95841	6.01685	6.56859	6.06086	7.20481	7.08408	6.67927	5.93933	6.1398	6.10405	6.33992	6.93692	5.88456	7.01039	6.79273	7.28927	6.36416	4.92918	6.44211	6.24733	5.9357	5.74422	5.96326	6.24329	6.89865	6.99356	6.2788	6.8966
ZNF563	8.96917	8.68669	9.1473	8.99891	5.98088	5.71387	5.95179	6.12811	6.88579	5.86695	5.16461	4.86285	5.48997	5.65465	5.36288	5.38011	5.48247	5.75977	5.4853	5.34694	5.8482	5.43242	5.49626	5.06104	5.45423	5.31457	5.18978	5.31731	5.51344	7.96969	5.56359	5.96516	8.0657	5.52251	5.81751	5.4075	5.6391	5.4313	3.59651	5.58439	6.59202	5.89155	5.57762	6.50822	5.69123	7.55642	6.05938	5.55914	5.77875
TYK2	7.55693	7.48811	7.6488	7.74404	8.72793	8.68136	8.38296	8.39953	8.65501	8.68102	10.761	9.88333	9.90346	10.6139	10.1536	9.61982	9.92258	10.1359	10.0763	9.61818	10.1681	9.85969	9.8109	10.0889	9.81991	9.86656	9.63312	10.307	10.113	9.76569	9.66644	9.55481	9.58688	9.76755	9.8429	9.55896	9.90059	10.0552	6.8231	9.5486	9.7285	10.1095	9.75518	9.45642	9.96305	9.80047	10.0111	9.66735	9.75759
CCNB1	7.02603	6.13453	6.93194	5.69	6.43347	6.51139	6.66469	6.77263	7.75956	6.22372	8.55954	8.2456	7.68621	7.37506	9.30249	8.57486	8.02125	9.61774	8.03544	10.18	8.34717	8.41769	7.55624	9.45285	7.49901	9.8399	8.94894	8.41374	8.44707	9.4183	6.27672	8.03459	8.83949	7.78688	8.63529	8.39178	9.45524	9.99556	6.47042	8.49644	8.01911	7.08241	8.63741	6.68769	8.28537	7.13855	8.69356	8.3298	8.98856
C5orf34	4.31018	4.45462	5.24356	4.90407	5.48176	5.58087	6.53965	5.88684	4.84118	4.40108	5.86322	7.36694	6.35445	6.32582	8.16169	6.7777	5.99889	6.74258	7.3261	7.54094	6.50173	6.1943	5.44973	7.03574	6.50126	7.45102	6.17248	6.0657	6.214	6.95416	5.23933	6.74163	7.59057	5.6251	7.49744	7.55696	5.99566	6.56776	4.5744	6.56843	6.85681	5.64154	6.76972	5.39653	7.17596	5.56926	6.26654	6.59672	6.1396
FASTK	8.56119	8.7135	8.67643	8.54778	8.97709	8.95947	8.94884	8.67549	8.86707	8.93893	9.79727	9.39242	9.34176	9.66228	8.84188	9.17345	10.5749	9.48063	10.1182	10.2804	9.41573	9.49882	9.49235	9.82131	9.24006	9.41791	9.07365	9.34836	9.95978	9.27638	9.09468	8.99247	8.80565	9.32831	9.80613	10.6713	9.37686	10.3943	9.29511	9.63375	8.95636	10.302	9.10025	8.83421	8.99127	8.85489	9.52833	9.00371	9.16344
RP5-855D21.1	7.24395	6.6089	6.86995	6.62069	5.4505	6.51522	8.28598	6.66867	6.97412	5.49315	5.08618	5.27107	6.06332	5.49828	4.79808	5.19681	5.29811	5.33891	6.36791	4.64931	5.30586	4.80907	6.00975	6.10253	5.28408	5.10048	5.6749	5.73574	5.28459	6.08875	5.59163	6.13494	5.78478	5.43527	6.09978	5.88527	5.5495	5.30983	2.13298	5.92362	5.56746	6.31012	6.325	6.88358	6.78305	5.85773	5.68017	5.794	5.47882
YDJC	6.33303	6.45157	6.3451	6.31412	6.82727	6.90772	6.83997	6.7259	6.65812	6.73602	7.42387	7.43857	8.11745	8.76281	7.08091	7.19375	6.56637	7.40368	8.13818	7.71151	7.21466	6.93313	6.79036	8.04376	7.48848	6.90846	7.45029	7.27413	6.62512	7.78801	7.1267	7.74161	7.93417	7.54622	7.72821	6.98032	7.37348	8.78209	5.76124	7.48049	6.75359	7.91141	8.00157	7.34266	7.67343	7.37133	8.19063	7.37874	7.82892
GSDMD	7.6398	7.46701	7.24641	7.24036	7.98604	7.88177	8.0498	8.07809	7.99585	8.18815	9.97487	9.3228	8.65028	9.04269	7.3603	9.11642	9.48274	8.66947	8.25644	8.3713	7.11129	9.02353	8.48023	8.95055	8.73571	8.31401	8.79792	8.41472	8.54579	8.87893	8.60366	7.99418	8.89165	8.63003	8.42302	8.868	8.18037	10.1697	8.38722	8.14201	8.22478	10.8416	8.42957	7.40444	7.49281	8.98401	9.51471	8.57307	8.28508
COX5B	10.254	10.9401	9.94415	9.97155	11.2456	11.0194	11.1093	11.0343	10.9592	11.1616	12.192	12.1396	10.8349	12.5775	12.1545	11.2964	12.3498	12.1446	11.2275	12.3383	11.6378	11.4288	11.7054	11.7942	11.4547	12.1541	10.668	11.3936	11.8529	11.4789	10.8536	11.0422	10.6765	10.9652	11.7483	12.4501	12.0893	12.6455	11.7532	12.2071	11.8017	12.4057	11.1993	10.5336	10.9525	10.2139	11.2591	10.6914	10.7726
PDP1	8.06742	7.46008	7.45746	7.39077	8.29888	8.43465	8.42927	7.78492	8.40138	7.62384	8.70433	9.93563	8.56357	8.46537	8.82762	9.10497	11.363	9.11297	9.50375	10.0095	8.66251	10.0345	8.84512	9.68306	10.1854	9.03654	8.98541	8.34706	8.9188	8.12967	8.771	8.39002	8.148	9.19431	8.92231	8.86049	8.26058	10.1219	9.34264	8.97156	7.93684	11.486	8.72067	9.09122	8.56882	8.37525	9.0166	8.80657	9.07218
ZNF474	5.99358	5.76105	5.99789	5.85721	4.9504	4.57653	4.69498	4.6646	4.80668	5.32649	7.58833	7.26147	7.83143	7.53847	7.92361	7.86129	7.74989	7.87887	7.77462	7.38912	7.69599	7.72887	7.68911	7.97017	7.59891	7.76969	8.03289	7.8461	7.63402	8.02522	7.85252	7.71639	7.90112	7.71626	7.85514	7.91224	7.65408	7.85795	3.139	8.04508	7.82319	7.24195	7.77753	7.8609	7.78557	7.84162	7.43005	7.98777	7.99091
RTKN	5.95086	6.09381	6.25957	6.02684	6.06257	6.39918	6.58157	6.51325	6.70517	6.83537	7.4253	6.82601	6.48605	7.34981	6.73773	7.70431	7.47804	6.88076	6.06352	6.97544	6.56035	7.36863	7.0559	7.47355	6.65373	7.53397	6.96907	6.70514	6.91239	6.78512	6.39644	6.59553	6.76318	7.08176	6.98836	6.98898	6.70796	6.90962	6.01246	7.45459	6.84676	6.59554	7.44637	6.09546	6.92511	6.4237	7.19733	6.80345	7.15844
LOC101927943	8.49082	8.27896	8.86581	8.67322	5.57493	5.76132	5.82542	5.76328	5.64258	5.95558	5.78278	5.14826	5.84956	5.52695	5.32101	5.34108	5.18186	5.53566	5.51057	5.32676	5.64761	5.55783	5.33221	5.49082	5.44791	5.10797	5.55568	5.69563	5.6553	5.91	6.10372	5.96306	5.53586	5.77201	5.31147	5.71327	5.29306	5.29803	1.5167	5.94273	6.14701	5.42331	5.75721	6.55573	5.62176	6.00364	5.52679	5.6751	5.4823
CYS1	6.60567	8.67932	7.483	7.60619	8.71132	9.18424	8.97054	8.49874	8.31085	9.13991	7.8332	5.67063	6.46343	5.49391	5.45698	5.71447	6.31713	5.68414	5.45187	5.80352	5.47144	5.36349	6.01563	5.4742	6.82638	4.96682	5.97813	6.54339	6.24246	4.67552	6.05536	5.63042	6.08823	5.11678	5.54147	5.39098	5.15484	5.00513	3.03228	5.2535	6.01927	5.69972	5.7626	5.69622	6.63964	6.30041	6.21847	7.22713	5.64405
RCN2	8.65459	9.38413	8.99336	9.15917	9.61773	9.98228	9.83326	9.98254	10.0538	9.77124	11.3872	10.3751	9.46389	10.7552	9.86468	10.9175	10.8145	10.0817	10.0845	11.9328	10.6513	9.88979	9.98647	11.5026	10.668	11.4492	10.0968	9.8989	11.522	9.71022	9.5621	10.2197	9.89913	9.68999	9.93528	11.6688	11.9029	11.7249	10.1014	10.4461	10.1757	11.0661	10.6315	9.12452	9.82091	9.79441	9.9611	9.61821	9.99386
WT1-AS	10.358	11.4302	10.6038	10.5169	8.6149	8.49573	8.17734	8.56178	8.48036	8.59834	6.69653	6.74789	7.17428	7.64763	8.42543	7.28412	6.42934	7.01617	7.20485	7.10727	6.91729	7.15443	6.51359	6.81989	6.66136	7.44222	6.952	7.47439	7.85319	7.32332	8.11329	7.30784	7.90551	7.16705	7.20344	7.19286	7.19227	7.57249	6.64197	6.94992	8.40308	7.24625	7.58694	7.52334	8.23298	7.73404	7.73593	7.57492	8.11718
JUP	8.06318	9.02461	8.59677	8.2297	8.80432	9.26496	9.58494	8.76339	9.40477	9.61455	10.1477	9.60481	8.82872	10.4202	9.26963	9.74355	9.80412	10.0748	9.61679	10.5667	9.58024	10.0676	9.52224	10.5768	9.5992	10.5948	9.6323	9.20325	10.077	10.2091	9.25509	9.00374	9.21277	9.04191	9.62393	10.1799	9.83801	11.2964	9.9111	9.59736	8.76221	10.1994	9.65801	8.85554	9.05617	8.6159	9.35731	9.26315	9.167
ARMCX1	9.66818	10.4643	9.30954	9.42251	11.1821	11.2517	11.4375	10.9749	10.753	10.9	7.92662	7.73902	8.37181	9.04907	7.92809	9.64376	8.59867	7.04331	7.27323	9.0599	9.27363	8.46262	8.28831	7.00553	9.28925	10.1309	9.4082	7.82112	9.43612	9.21171	8.08899	8.13122	8.8355	9.2096	8.45927	7.53455	9.16466	9.81765	7.24831	6.77835	7.13011	10.6596	9.18546	9.16177	8.76979	8.37905	8.56761	9.31112	9.43842
RP11-245P10.8	5.09578	5.31566	5.71042	5.36923	4.66253	3.90377	4.10038	4.21543	4.94782	4.65539	7.69444	8.11514	8.09158	6.72343	8.07386	8.04585	7.45053	8.25645	7.90027	7.41399	7.82993	7.76937	7.84003	7.64041	7.79782	7.51607	8.0242	7.69457	7.77433	8.17983	8.06523	7.98858	8.13272	8.15905	8.13361	7.71211	8.07611	7.86796	2.39361	7.7659	7.9422	6.80654	8.08081	7.90803	7.97802	8.04238	7.8667	8.2716	8.04196
BZW2	9.10662	9.26124	9.06855	8.86526	9.68192	9.70685	9.95396	9.64857	10.1815	9.57597	11.6789	10.4229	10.4721	11.6028	10.282	10.3059	10.7394	10.7544	9.50121	12.6194	10.5996	11.5015	10.9521	11.033	10.5113	11.5496	9.95048	10.0981	10.9246	10.8518	9.58676	10.2075	10.1454	10.0326	9.96394	10.3206	11.8444	11.5881	10.0503	9.72273	10.1168	11.1529	10.7377	10.2435	10.4914	9.56899	10.7073	9.81311	10.005
HOXC6	8.82416	9.13045	8.46253	8.60419	9.02724	9.26655	8.81402	8.77005	9.19908	9.60519	8.661	8.21917	7.83801	8.1807	8.15037	8.10883	8.29705	8.57383	8.60903	8.2583	8.26719	8.64212	8.11933	7.61377	8.90145	8.11344	8.58888	8.31215	8.464	8.37773	8.00695	8.1545	8.22035	7.96384	8.08553	7.75645	8.26015	7.51012	1.89705	7.76194	8.37906	8.62168	8.25129	8.08992	8.13134	8.47988	8.20298	8.40874	8.4564
SERPINB9	7.56698	8.30044	7.6056	8.07208	9.17072	8.71533	9.18866	9.04197	8.75572	8.7504	7.97537	7.18275	7.91454	7.84785	7.55204	7.66059	7.41411	6.37077	8.69174	6.98201	8.077	7.20711	6.8201	7.47182	7.29543	7.06984	7.36909	7.39692	6.27609	7.7239	7.73454	7.76362	7.81094	7.4667	7.04991	7.47068	6.77528	6.87042	6.20991	7.07258	7.37644	9.07363	7.14381	7.41429	7.50804	7.86501	7.85655	7.72547	7.31518
RNF112	8.04325	8.6088	8.12458	8.13608	6.92109	6.93085	7.02612	6.74074	6.79716	6.9119	5.82566	5.619	5.91895	5.8448	5.5138	5.66426	5.62843	5.74187	5.9088	5.22179	5.68876	5.55141	5.45439	5.574	5.64684	5.60086	5.67088	6.00806	5.58934	5.52427	5.7181	5.87421	6.14669	5.59919	5.73369	5.56977	6.09269	5.64809	3.11899	5.5081	5.53293	6.46563	6.26585	6.01362	6.21418	6.59094	6.22763	5.81016	6.19343
CEBPA-AS1	7.90844	8.24135	7.81893	7.90647	6.77413	7.05308	6.95696	6.68775	6.70412	7.17368	9.48905	9.75902	9.85511	8.08686	9.78961	9.62624	9.53325	9.72194	9.82616	8.92652	9.61664	9.78921	9.41053	9.40468	9.69031	9.63868	10.0123	9.79291	9.63086	9.77753	10.0322	9.70959	9.83079	9.75579	9.80186	9.50119	9.6113	9.32366	6.46034	9.81103	9.51919	8.12575	9.61023	9.67262	9.63241	9.45507	9.2106	9.8309	9.49206
RAB20	8.47486	7.59861	7.83676	7.19497	8.43298	7.3569	7.54775	7.13195	7.63428	7.54249	8.73418	8.57678	8.26346	8.00373	8.01621	8.54279	8.40727	8.52495	8.12546	7.89861	7.51888	8.02291	8.74039	8.17775	8.15334	8.05215	8.02669	7.92056	8.51007	8.60419	8.22616	7.77558	8.74813	7.81855	8.03504	7.98601	8.27534	9.33099	7.93453	8.45345	7.82668	9.56179	8.06664	8.04573	8.18995	8.2925	8.50139	8.31387	7.73099
TSFM	8.35478	8.4634	8.64786	8.48687	7.24908	7.05743	6.99592	7.12408	7.45018	7.1756	9.07239	8.57096	8.10746	8.65057	8.31855	8.6189	8.23973	8.37975	8.53126	9.68594	8.65639	8.32252	8.44226	7.89639	8.46349	9.23511	8.69649	7.94808	8.7668	8.51051	8.29261	7.87318	8.48879	8.51978	8.4515	8.96892	9.1792	8.25076	6.67486	8.74869	8.26145	8.23017	8.32201	8.42829	8.72076	8.27406	8.21919	8.29219	8.94019
EIF6	9.29235	9.48805	9.13272	9.02959	9.89378	9.87063	9.92656	9.80533	10.3094	10.0108	11.5603	10.2765	9.73454	11.5167	10.4441	10.9152	11.2099	10.7172	10.0683	12.0675	10.633	10.8377	10.29	11.0117	10.3981	11.3971	9.98571	9.59943	10.9009	10.4518	9.34181	10.0202	10.3216	9.85801	10.3431	10.9271	11.6729	12.2845	10.414	10.4144	9.68587	11.3697	10.3932	9.15587	9.88577	9.14646	10.3616	9.77716	9.7354
SLC17A5	9.50312	10.5844	9.81002	9.65615	8.68766	8.52153	8.33563	8.63238	9.59901	9.53146	8.03595	7.67269	8.17742	8.24967	8.20618	7.86779	8.56632	8.44678	7.68276	8.01584	9.11429	8.57294	7.57676	9.48965	8.70949	7.95287	8.06399	8.11947	8.77828	8.13953	7.82314	7.72688	7.83583	7.36315	8.39689	8.43409	7.06054	8.26757	5.91218	7.70677	7.20857	9.18865	7.84015	8.44807	8.3272	7.93411	7.6334	7.8678	8.31237
GAS1	9.88291	11.2239	9.49509	9.79147	11.9978	11.9619	11.8329	11.9341	11.7373	11.3504	8.93699	7.22982	8.80097	9.42402	10.5017	9.31757	9.39108	9.75044	8.29622	11.4347	9.57647	9.10128	7.94583	9.93853	9.76567	7.65912	8.61847	8.99708	10.131	8.84532	8.45351	8.35428	9.21946	8.76338	9.68739	10.4924	8.62274	7.98085	6.49395	8.53923	8.23849	7.33171	7.21721	8.07139	8.9293	8.84452	10.0085	9.7433	8.30922
PCDH7	7.48498	7.59583	7.97125	7.43849	5.87358	5.74179	6.00404	6.27499	6.19305	5.52316	7.98715	8.83701	8.21981	7.11948	7.92749	7.60453	9.16543	7.72531	8.30954	7.58369	8.42985	7.93977	8.06295	7.3712	8.32916	7.31484	8.35227	8.12586	8.37104	8.03105	8.14616	7.32176	8.17423	7.73338	8.14403	8.69659	6.97673	7.68711	7.03745	7.51385	7.38465	9.56873	7.55365	7.53318	7.87824	8.15147	8.30328	8.19493	8.51521
LOC286161	8.73433	8.26688	7.55078	8.52718	8.21585	8.93587	9.07273	8.64288	9.40628	8.78861	7.36077	6.29249	5.28672	6.48881	6.72355	7.07913	7.63003	6.11321	7.29051	8.28574	7.78758	7.6817	8.49	7.54626	7.54246	8.4346	6.99489	5.69904	7.14321	7.22953	6.70172	6.20825	5.89679	7.94906	5.92227	7.01843	7.28966	6.83444	8.67177	7.51756	6.27342	6.5843	5.61985	5.88663	5.88615	5.90606	7.21941	6.05838	7.04262
PRIMA1	9.47487	10.0165	9.61314	9.46077	7.32646	6.75873	6.81835	7.0428	5.99347	6.57908	9.86396	9.88949	9.85721	9.57535	9.68238	9.72171	9.83141	9.95526	9.60068	9.75031	9.50421	9.59949	9.4435	9.17954	9.43405	9.38984	9.68498	9.75424	9.79025	9.96251	9.60599	9.81643	9.83145	9.92223	9.82576	9.63534	9.88636	9.63233	6.23904	9.63319	9.52415	10.0347	9.8831	9.73911	9.8303	9.87477	10.119	10.1956	9.96306
ZCCHC24	8.26756	9.0635	8.38755	8.31668	10.2151	10.1691	10.3035	9.59012	9.34123	9.85318	6.9488	7.14228	8.08968	7.31945	7.46961	7.98292	8.3116	7.20619	8.01284	7.35668	6.85975	6.99194	6.15318	6.65139	8.68939	6.59781	7.6145	8.09741	7.08829	7.72952	8.18309	7.40672	8.44758	6.9153	8.36834	7.12652	7.15986	8.0372	5.86932	6.6559	7.71878	8.3026	7.2405	7.45362	7.34777	7.82778	8.54661	9.11338	7.19563
ODF3L1	8.47445	8.74866	9.35855	9.32337	6.78726	6.30563	6.33493	6.35058	5.97616	6.36246	5.52324	5.36786	6.3756	5.69627	5.50779	6.07603	5.52761	5.30165	5.66255	5.44899	5.46666	5.6504	6.22496	5.95165	5.77521	5.68557	6.1793	6.10661	5.7193	6.26072	6.09473	6.34756	6.83367	6.11764	5.92774	5.38645	5.99123	5.612	4.03014	6.00623	6.09827	5.75224	5.51184	6.09445	5.75138	7.21759	5.45734	6.12812	5.79402
METTL1	9.54201	10.1688	9.62521	9.63326	7.31376	7.06807	7.28765	7.36667	7.43208	7.3529	9.10607	9.86559	9.86701	8.85327	9.64737	9.98425	9.10934	9.56798	9.84429	8.75785	9.84449	9.82677	9.90489	9.95408	9.72258	9.89426	9.79337	9.57811	9.69288	9.73797	9.81664	9.7843	9.8871	9.83765	9.79006	9.80476	9.91525	9.39543	6.95031	9.94321	9.88785	8.5589	9.7316	9.60271	9.62678	9.91977	9.40058	9.63533	9.81325
MCUR1	8.31523	7.99614	7.97503	7.69491	8.79203	9.03656	9.1646	8.96834	8.92275	8.8429	10.2254	8.95142	9.21956	10.4543	10.6248	9.2399	11.0109	9.33838	9.64687	11.3904	9.1353	9.46748	8.61551	10.6183	10.0234	10.0349	9.31507	9.10653	10.0431	9.14375	8.70738	9.35887	8.74194	8.74149	9.67697	10.4457	10.4826	11.2463	8.83275	10.1976	9.21988	10.3362	9.46319	8.33057	8.78663	8.79845	9.44364	8.9993	9.17763
RAB38	8.5083	8.72318	8.4376	8.85014	9.34434	9.76619	9.6158	9.10148	9.26883	9.50055	7.16833	7.53081	8.48213	7.07716	7.89629	7.81579	6.80663	7.58272	7.85287	6.62894	8.41274	7.89429	7.57286	7.2761	8.18013	7.61037	8.44503	7.89308	8.00555	8.53941	8.28762	7.91923	8.6368	8.54743	7.76147	7.98661	8.51511	8.59955	4.68766	7.59401	7.90087	6.80179	8.1203	8.08271	8.9255	8.54598	7.53622	7.89736	8.98174
STAR	7.83933	9.30404	8.17513	7.35663	7.54772	9.63078	7.66277	6.54819	7.93062	9.67422	5.29708	5.58009	6.29837	7.97603	5.36155	5.40858	5.3896	5.99628	6.25298	5.02442	6.08896	7.54342	5.81785	5.05898	5.54933	5.73922	6.25537	5.95442	5.71902	5.48633	5.85104	5.47681	5.54529	5.16171	5.74378	5.85993	5.32535	5.67027	1.85438	5.30649	6.80318	8.69715	7.59502	5.75742	7.3818	7.87793	5.65852	5.63141	7.29112
NAA38	8.53149	8.90685	8.78797	8.57572	9.82445	9.6408	9.68246	9.48873	9.4595	9.85879	10.6779	10.2921	9.47589	11.3933	9.46915	10.1045	10.721	10.6685	9.36106	10.7129	9.89285	9.6314	9.90536	10.6897	9.70929	11.025	9.37575	9.30631	9.98142	9.66591	9.30205	9.18565	9.47865	10.0511	9.59301	11.2166	11.5958	11.8399	9.33899	9.92115	9.53142	11.1159	10.0596	8.7455	9.52864	9.49348	9.6846	9.44742	9.99897
KIF18A	4.67935	4.63846	5.26321	4.61163	4.83349	4.63479	5.29442	5.23727	5.12445	4.61437	5.9875	6.53076	6.79214	5.88696	6.24136	7.01958	5.518	7.30545	6.48583	6.71361	6.32677	5.22541	4.9451	6.61833	5.44898	6.29216	5.53062	6.33601	6.45594	6.0937	5.63636	5.72014	6.03334	5.64134	6.78162	7.19575	6.79399	6.70929	3.1165	6.84215	7.55049	5.28712	6.91614	5.18207	6.10543	5.5659	6.24266	6.22841	7.04032
SFN	9.3778	8.72348	9.25384	8.69573	8.88608	8.25492	9.72961	8.71485	9.3246	9.03256	11.2186	10.8186	9.59976	9.97003	10.1223	9.68176	12.6152	10.4099	9.50423	12.2298	8.77118	11.2721	10.3073	10.0937	10.8495	9.91295	10.0111	11.504	8.66264	10.3956	9.33232	9.74916	9.83547	8.31648	9.9762	11.6719	9.85407	12.1512	11.2567	10.054	9.73106	11.6342	9.7741	8.80723	9.35482	9.3466	10.823	9.69173	9.78567
UBAP1L	9.94279	10.6719	10.187	10.1444	8.44939	6.86532	7.22292	8.37705	7.81289	8.02007	6.78162	6.92065	7.90173	6.48541	6.98079	7.42932	6.9373	6.76805	6.85651	6.9694	6.53818	6.79104	7.33518	6.90732	7.00813	6.71554	7.35176	7.10161	7.03766	7.87094	7.27747	7.77034	8.7174	7.22197	7.24963	7.37456	7.16738	7.07893	4.13745	7.72235	7.73718	6.80855	7.05308	7.2658	7.71403	7.96908	7.15834	6.88236	7.04141
MST1	9.68056	9.55116	9.17874	9.87097	11.0069	11.145	11.7259	11.6574	11.1032	11.0662	8.61114	7.92925	7.90033	9.04436	8.2689	8.07518	8.87528	9.64959	7.29619	9.67415	9.34786	7.87445	9.49399	8.07394	7.57799	8.84427	8.02569	8.54373	8.38433	7.97951	8.19728	8.36717	8.97913	9.20161	7.67926	10.0291	8.88672	9.12272	6.97388	7.84682	7.52397	7.91483	8.99583	7.77901	9.52768	8.10891	9.65173	8.37452	8.86804
TOP2A	8.46483	9.28359	8.39851	8.22553	5.02317	4.49937	4.9071	5.68515	6.14414	4.7341	8.19292	9.26008	8.75347	6.44769	9.2681	8.85318	8.57262	9.32175	8.65223	8.59941	9.1359	8.50075	8.32401	9.13901	8.47123	9.47658	9.27097	8.38381	8.72908	9.28201	8.78858	8.75522	8.93609	8.34188	8.77808	8.82574	9.21814	8.71222	6.00064	8.65507	8.39231	5.94001	8.53659	8.59556	8.64185	8.64708	8.70449	9.01506	8.90454
CMTM6	8.97104	8.58922	8.41942	8.36853	9.79396	9.90367	9.58292	9.14774	9.86078	9.36572	11.8077	9.64877	9.09939	10.864	10.5565	10.4684	11.289	10.6328	10.2883	11.6847	10.1434	9.88461	10.9452	11.1494	9.48971	10.7892	9.07856	10.2911	9.9431	9.41263	9.23535	9.5635	9.69276	9.74481	9.43343	12.0189	9.76297	11.4623	9.89346	10.4137	8.5456	10.6226	9.61084	8.7789	9.53901	9.19805	9.90906	9.70216	9.70255
MRPS16	7.3355	7.99583	7.67141	7.39484	8.2711	8.31145	8.34631	8.18398	8.41212	8.32435	8.98601	8.53583	8.29936	9.00838	8.12188	8.63502	9.23876	8.02142	7.94687	9.05506	8.48383	8.25933	8.11884	8.81029	8.69815	8.71014	8.7376	8.3571	8.68571	8.3396	8.08841	7.99799	8.48096	8.02765	8.64669	8.81408	9.19939	9.34764	8.10918	8.97052	8.44335	8.07434	8.72594	7.76082	8.21948	8.11941	7.85502	8.02963	8.52666
ARFIP1	8.5473	8.58061	8.47618	8.39077	8.95029	9.19309	9.08059	8.92986	9.35757	8.86275	10.6832	10.1639	9.61446	10.1716	9.54894	10.415	10.6904	9.97876	9.64721	11.3802	9.65878	10.1901	10.082	11.0132	10.0491	10.4063	9.69969	9.5089	10.592	9.81004	9.21971	10.2056	9.45995	9.42079	9.59311	10.6451	10.4701	10.7292	7.93803	9.55453	9.26401	10.98	9.76024	9.19338	9.53319	9.41411	10.1364	9.69396	9.4033
GTF2IRD1	7.85084	8.17671	8.39471	8.26743	8.67542	8.77345	8.62417	8.53776	8.55326	8.98339	9.32216	8.96824	8.76585	10.4454	9.26523	9.566	8.81619	9.34257	8.87973	10.9979	9.19846	9.78084	9.12198	10.5896	9.41631	10.014	9.44126	9.0117	9.66713	9.23792	8.86788	9.15466	9.24386	9.08647	9.15109	9.90991	9.76262	11.2206	7.1243	9.45884	8.40482	9.7083	9.09766	8.33524	8.78042	8.6587	9.08874	8.85702	9.05974
LOC100130458	7.89053	7.69052	8.11599	7.29276	5.61338	5.28884	5.68013	5.39831	5.33471	5.4558	4.97643	4.78343	5.07711	4.61103	4.65699	4.62223	4.60674	4.84819	4.28381	4.35105	4.7205	5.16112	4.66739	4.13167	4.86798	3.90222	4.81782	5.34731	4.37656	4.38676	5.26355	5.0944	6.5519	4.36897	3.78897	4.52812	4.42544	4.13797	1.74506	3.70564	3.93232	3.55772	4.22304	4.09088	4.60088	4.35362	3.45228	3.73915	4.06468
GRAMD2	7.7906	7.86841	7.60138	7.5366	7.21276	7.18845	7.21996	7.81567	8.07614	7.40018	10.6454	8.76761	9.28702	9.03881	8.37337	8.46594	10.2947	7.61649	7.05944	8.99793	8.42531	8.34272	10.1335	8.10378	8.86978	7.77063	8.63236	7.61711	8.50599	8.42625	9.27762	7.46986	9.66608	9.23835	9.93777	9.81423	7.41852	8.72274	5.45233	9.26615	9.80158	8.49175	8.25948	7.48231	9.43507	7.32472	8.30489	7.61559	9.49764
RCAN3	6.56325	6.53252	6.88231	6.88831	7.43147	7.77186	7.15107	7.0111	8.26836	7.42275	8.37104	8.0371	8.11412	9.3488	7.28694	7.61422	9.80145	8.08308	7.75603	9.70112	8.30913	8.96259	8.4757	9.35902	8.64652	8.74892	7.85389	7.91527	6.99993	8.08526	7.50132	7.63899	7.6203	7.19078	7.42518	9.50182	8.72196	10.0876	7.18968	8.249	6.92062	8.64032	7.8603	7.71289	8.08135	7.19171	8.26562	8.00632	8.13413
HPDL	5.27895	5.35224	5.23545	5.0373	4.95703	4.61277	5.21578	4.76712	5.25526	4.65778	6.10775	5.738	6.46053	7.04883	6.13292	6.14016	5.49613	6.22735	6.1872	6.88124	5.9635	6.11349	5.58687	6.05056	5.46214	6.30589	5.85015	5.79006	6.69008	6.4951	5.88056	6.40103	5.71002	5.78513	7.27288	6.61442	6.6808	7.00971	4.67959	5.53849	6.28069	5.26044	6.23143	5.72334	6.52203	5.71512	5.56679	5.48251	7.11398
COL6A6	6.80389	5.63484	5.64531	6.01036	6.95219	7.1432	8.12088	7.93708	7.23019	5.6324	5.57187	5.61425	5.14224	5.59033	5.80343	5.28459	6.68151	5.52631	5.76289	5.78895	5.22283	5.40829	5.06325	5.33244	6.83556	5.41018	5.51865	5.65672	5.27136	6.53143	6.79031	5.67419	5.45785	5.13558	5.90222	5.99606	5.49387	5.40054	4.26514	5.23368	5.57377	5.67628	5.2016	5.8677	5.19092	6.03566	5.92168	5.6321	5.31699
NOP58	9.16566	9.0029	9.4919	9.62574	10.2387	10.4178	10.6257	10.3977	10.3172	9.80265	11.8269	11.1697	9.88403	11.5106	11.1029	11.022	12.0294	10.0829	10.6694	12.2797	10.196	10.9267	10.7468	10.9818	10.6671	10.9293	10.1914	10.4567	11.7185	10.7814	9.86526	10.0961	10.0495	10.1097	10.5327	11.611	11.1559	12.1654	11.573	11.3287	10.2715	11.9497	10.2763	9.55955	10.359	9.44293	10.1052	10.0596	10.3434
GALNT3	7.30127	7.88046	8.37625	8.42176	7.98343	9.10621	8.73827	8.31996	9.52609	9.49483	10.1758	10.4218	8.94127	10.6488	8.69377	8.8161	10.6852	8.38911	9.72682	11.2694	9.45533	9.2791	9.8599	10.5735	9.34235	10.3203	7.89088	8.89714	10.0004	9.03998	8.89079	9.0161	8.47236	8.94969	9.46589	10.6872	9.01392	9.75268	8.94726	10.301	9.38513	10.9003	9.42695	9.20962	9.01103	8.0615	9.40774	8.80407	9.20871
FGF18	7.35842	7.54589	7.3894	7.40503	6.74351	6.75162	7.03458	6.89262	6.72675	6.13745	8.06789	7.5559	7.98692	7.66737	8.0419	7.6843	7.43579	9.20253	7.86437	8.18958	8.6838	8.31603	7.66882	8.9007	8.31127	8.88505	9.22171	9.2501	8.14263	7.69157	7.59698	8.40697	7.96886	7.5836	7.42412	8.51665	8.89173	8.67004	4.75034	6.9746	7.05234	8.72603	7.43582	7.89423	7.66471	7.9603	7.45691	7.69187	8.29368
PNP	8.99816	9.61404	8.8954	8.95001	7.14339	6.358	6.75288	6.38057	6.10963	5.60899	8.06763	9.05528	9.14523	7.5505	9.03506	9.37352	8.00589	9.05397	8.84781	8.00732	9.15999	8.94947	8.95048	9.1426	8.828	9.42524	9.5444	8.69689	8.7839	9.03319	9.24577	9.13405	9.24042	8.65731	9.02916	9.44687	9.25772	8.57967	5.85773	9.35069	9.16925	6.49991	8.69508	8.82195	8.56837	9.03837	8.71401	8.81329	8.883
BEX1	9.6141	10.2503	8.90551	9.14019	9.6797	10.5857	9.23819	9.33042	10.4543	9.94984	8.11795	6.99073	7.03951	7.5079	7.20665	7.41798	7.24886	7.19169	7.11777	7.05553	9.49084	7.60338	7.66563	6.57487	7.04121	9.52249	9.97468	7.25284	8.57644	6.84987	7.21571	7.52484	8.4463	7.10141	6.94207	6.79323	9.40452	6.93687	5.33224	6.72892	6.74876	9.72293	7.32502	7.39014	9.05518	7.95381	6.78712	6.97921	7.1053
PRR9	6.30039	6.29931	6.61683	8.42086	6.33475	5.17886	5.78784	9.30159	9.61619	6.06435	6.75983	6.45597	6.14646	7.03047	6.60282	6.32988	6.39018	6.94263	6.46098	6.53534	6.34112	6.53125	5.94811	5.95239	6.42496	6.28492	6.85008	6.31513	6.24743	5.86146	6.4039	6.15958	5.88158	6.22992	6.28027	6.16437	5.99156	6.18732	4.53614	5.63377	5.67768	6.92786	6.21365	5.99567	6.32186	5.94196	6.26187	6.21958	6.08717
GINS1	6.89463	6.88102	7.84581	6.90719	7.08857	6.59741	7.28521	6.77753	7.47045	6.57342	8.9433	8.36137	8.36687	8.04736	8.67164	9.15251	9.06363	9.85648	9.04912	10.2162	9.35807	8.80454	7.25988	8.96157	7.69748	10.5703	9.4023	8.62389	9.0122	9.25862	7.82767	8.79027	8.8174	8.40359	8.91198	7.82559	10.3937	8.80763	6.27343	8.84869	8.91137	7.04325	8.41492	7.79907	8.66521	7.54791	8.61115	7.84948	8.8095
LMNB1	6.78804	5.99493	6.51278	5.73285	7.51321	7.25057	7.06015	7.45179	7.38735	5.74371	8.41977	7.5176	6.8616	6.64182	8.06977	7.0212	8.98696	9.44061	7.98424	10.1136	8.17811	7.53542	7.13099	8.87566	7.85676	9.33101	8.50608	7.72072	8.22189	8.24387	7.77189	7.49843	8.2462	7.58837	8.9778	7.67031	8.87723	8.94322	6.07881	8.27508	8.39142	8.51922	8.01825	6.88035	7.61132	6.58347	7.91925	8.19145	8.20777
RP11-216L13.19	5.82121	5.70296	5.86454	6.72574	6.51137	6.52164	7.5597	7.04512	6.53126	6.34494	4.72547	5.59333	4.88573	4.61756	5.30023	4.28121	4.44352	4.53081	4.67117	5.23685	4.14907	4.21431	5.5469	4.48121	4.55517	4.8825	4.40866	4.73948	4.74866	4.83312	4.25552	5.03094	4.55253	5.21253	4.58206	6.16417	5.77478	5.50711	4.54916	4.1395	4.96535	4.78381	4.30696	3.87285	4.37767	5.9998	5.11568	4.06536	5.27424
PLAG1	6.2258	6.66604	7.31928	6.63715	6.40914	8.18072	7.26242	6.14749	6.0584	7.35431	9.04427	5.69723	8.62895	8.46382	8.76485	8.62475	9.65713	9.19996	8.96077	9.75206	8.64579	9.94616	4.189	9.14149	9.36154	9.84195	8.2608	8.29574	8.13621	9.15034	8.47531	8.12664	8.50915	9.80008	8.83202	9.36087	8.59034	9.50512	7.1465	9.3103	7.99442	10.2816	8.8706	5.82027	10.0556	8.326	8.66331	9.09862	5.02081
PEG3	9.56089	10.5383	9.08745	9.13538	9.93255	10.8766	9.93644	8.86302	9.87893	10.8667	6.84018	5.90706	5.96713	9.47763	6.88072	6.7105	5.3896	7.27798	5.07309	5.67677	7.82989	8.86518	5.58924	4.72612	8.13148	7.64196	7.56166	5.42484	9.52999	6.87391	6.64515	7.47494	4.82589	4.47945	4.76256	4.68455	5.826	5.07594	3.73937	4.73185	7.95801	11.4669	8.65108	7.09214	8.20697	8.57439	6.54369	7.04426	8.14702
IRAK2	5.96764	5.55992	6.05256	6.02281	5.75937	5.0254	5.55585	5.21065	5.33267	5.25224	8.10841	6.69437	6.5761	6.53914	7.08774	6.28584	6.46781	6.10059	6.7688	6.10286	6.19452	6.35737	7.75144	7.24032	6.43611	6.10759	6.60207	6.48107	6.50875	6.29881	6.48959	6.65363	6.94383	6.26789	6.90166	7.09541	6.3565	7.46508	4.75371	6.95474	6.61141	6.36939	6.94142	6.27479	6.40282	7.08311	6.43768	6.45898	6.02969
BC062753	7.87532	8.15616	7.23336	7.54864	7.96889	8.68461	8.43696	8.48111	8.93617	8.49333	7.35375	6.82591	6.66763	6.65804	5.79692	6.78374	6.85083	6.34618	6.47581	8.53316	7.19174	6.34017	7.00668	6.96759	6.89921	7.27028	6.97308	5.14206	7.21903	6.67732	6.08052	6.41213	5.95286	6.09384	6.92985	7.11299	6.2184	7.50855	6.01311	5.94791	5.72331	6.19528	5.20432	6.55513	7.09998	5.77649	6.78942	7.19423	6.55103
CLDN10	6.43494	5.90864	6.9392	5.60117	5.35396	6.59542	5.11634	5.29473	5.42114	5.57117	9.13135	9.24514	7.48176	10.0107	9.29586	10.12	7.71366	9.36788	8.81751	7.93603	5.92983	9.75528	9.52257	7.40546	5.75133	8.51556	6.04739	9.21434	8.63462	8.8932	6.75525	7.13891	9.13057	5.21464	8.22198	10.2887	5.68949	11.7755	7.06989	8.82238	7.01415	9.5067	8.67757	5.85429	7.394	6.89296	10.4553	9.06615	7.76819
SNAI2	7.67025	8.38893	7.4296	7.53806	8.07561	8.82121	8.64509	7.61081	7.84581	8.93695	6.91931	6.73982	6.43146	7.73115	6.38935	6.94615	8.01867	6.78399	6.53552	7.07254	6.53984	6.91766	5.80012	5.85647	9.13933	6.3988	7.48853	7.29021	6.03514	6.70606	7.0588	6.15073	7.06469	5.743	7.23955	6.21832	6.06177	5.86777	4.41384	5.415	5.90566	7.96614	6.25965	6.3541	6.02085	6.88098	7.39645	7.95192	5.58824
GATA6	7.76822	9.4375	8.32454	8.99281	9.92601	10.0179	10.1233	9.94003	9.76946	9.81314	7.60374	8.72061	7.46207	7.26351	7.50498	8.81784	8.34832	8.04387	8.67486	9.76145	6.49091	6.7028	6.84046	7.26179	7.53437	7.06957	7.17809	8.23245	5.58878	8.55925	7.9482	7.98942	8.67167	8.91628	7.89755	8.96992	7.31103	7.07676	8.33071	7.57376	8.32635	8.05578	7.70118	7.76388	9.29861	8.52034	8.6936	8.82576	7.64158
DEFB1	6.51808	6.10432	7.42455	6.29366	7.53695	6.52104	7.12573	6.15929	6.35785	6.57561	7.92693	11.2416	8.97357	8.07803	8.86611	8.84175	11.6007	7.13828	6.24708	6.92434	7.96137	9.22343	10.1276	9.65109	8.38447	7.47062	6.60898	8.57679	10.9468	9.47929	10.1924	8.51148	8.41032	6.30327	10.0517	8.31328	8.36072	10.5675	11.4129	10.1677	6.90534	7.63794	8.67954	8.05675	6.58277	8.3397	9.49351	8.69017	6.70837
SLC25A27	7.17594	7.37087	7.3045	7.92019	8.31308	8.82143	9.11352	9.15147	8.351	7.78547	6.46656	5.58104	6.09602	7.21427	6.09359	6.18332	5.98145	5.76797	6.15094	8.07557	7.54751	5.89498	6.37929	6.46348	6.10799	7.94083	6.09291	5.89961	7.01355	7.22007	5.88165	6.88678	6.13891	7.3887	6.02993	6.23893	6.88345	6.2637	6.26348	5.36796	6.77015	6.65407	6.90528	7.12642	7.21425	6.69055	7.07032	6.98712	7.88667
LOC101929759	8.60626	9.19421	8.70288	8.73614	6.62213	5.94336	6.09306	6.55278	6.20265	6.29052	5.65181	5.24954	6.0563	5.65438	5.47653	5.67972	5.4627	5.28664	6.22522	5.23043	5.34851	5.31258	5.13472	5.59006	5.32637	5.36175	5.74671	6.0469	5.56029	5.36162	6.11551	5.92174	5.44608	5.29209	5.62643	5.58614	5.4772	5.14582	3.19329	5.74516	5.60392	6.05772	5.87476	6.50856	6.02635	7.214	6.33497	6.16557	6.06859
MAP2	8.63618	8.87309	8.83228	8.92619	7.50581	8.4035	8.68446	7.96256	7.97847	8.2606	6.5459	8.048	5.3499	6.44203	6.16973	8.68774	7.87939	7.14618	6.80535	7.41062	6.33188	8.55487	5.58146	5.95257	7.32865	7.12181	6.23515	7.51281	6.27079	6.02743	5.74345	7.31639	6.87467	6.79062	5.89236	7.71012	8.23303	5.58039	6.95228	5.62108	6.17232	8.99782	7.99286	7.39304	7.69618	7.82509	6.68829	7.64204	7.89712
RP11-38C18.3	5.19417	5.05076	5.79437	5.30767	4.19547	3.80648	4.07775	4.10718	4.30773	4.30056	7.4406	8.10559	7.91739	6.09833	8.17298	8.18963	8.10839	8.08336	8.00659	7.02937	8.12862	8.15038	8.39228	8.58578	8.18214	8.17184	8.38355	7.87288	8.25614	8.18919	8.07264	8.39043	8.22845	8.09303	8.2874	8.23775	8.07619	7.85703	4.16241	8.46309	8.52725	6.08815	8.2076	8.30795	8.01281	8.15275	7.90902	8.4876	8.05231
SPINK1	5.19352	4.88127	5.54505	5.21891	4.73602	4.48524	4.05537	4.61468	4.44284	4.848	6.53737	6.4878	6.48054	6.48572	6.67728	6.27487	6.74895	6.39281	6.51013	6.49651	6.53572	6.36503	6.35303	6.52355	6.41521	6.27046	6.44854	6.40309	6.10963	6.49514	6.08836	6.37788	6.50972	6.13626	6.53463	6.72698	6.69587	6.66413	3.93515	7.32764	6.53173	6.23817	6.23708	5.97413	6.10349	6.15981	6.16886	5.93444	6.02
AASS	6.34026	6.30766	6.54332	7.10822	6.73391	7.71383	7.89337	8.33577	7.3228	7.10113	5.8608	5.11218	4.69727	7.55545	5.62278	4.79716	5.68372	6.25301	4.7607	5.46548	6.66023	5.0962	5.15075	5.33296	5.83735	7.04712	5.30294	4.81549	5.9391	5.7133	5.4841	4.72194	5.25178	6.25267	4.86063	5.25392	4.38083	4.57582	2.95534	4.37838	5.47002	5.36536	6.18817	4.65659	5.86239	5.21092	5.76681	5.83071	6.94021
CEP170B	8.11932	8.0308	8.14321	7.88783	7.6812	7.6972	7.65626	7.89195	8.01583	7.89368	9.50403	9.23801	8.73023	10.3429	9.30002	8.44552	10.5709	9.38444	8.6474	10.9891	8.82736	8.84159	9.02765	9.0801	9.04075	8.76705	8.9114	8.75939	9.31831	8.87025	8.39367	9.13813	8.92073	8.42148	8.72108	8.95884	8.73813	9.59441	8.83238	8.92029	8.50176	9.37829	8.3354	7.87817	8.47236	7.87302	9.35812	8.62351	8.64696
RHOF	7.88191	7.85532	7.90928	8.15422	6.57916	5.92366	6.06435	6.33018	6.11178	6.42897	8.23349	8.5768	8.79677	7.55377	8.84047	8.54733	8.51322	8.68961	8.53977	7.42181	8.45871	8.31734	8.51879	8.77229	8.40575	8.26596	8.65064	8.67568	8.13388	8.74905	8.91621	8.43346	8.50835	8.62377	8.58942	8.65197	8.7256	8.81282	4.45606	8.73866	8.90039	7.34794	8.61175	8.67522	8.64965	8.80308	8.42373	8.75944	8.5205
GEN1	5.14946	3.80889	5.02454	5.0297	5.46823	4.49944	5.9822	6.22756	4.91842	4.40973	6.73599	6.46817	5.44969	5.24511	6.27803	6.48564	6.48459	6.16194	6.52655	6.254	5.27724	6.4983	5.76481	5.98883	5.91111	7.14916	5.87883	6.21323	6.45148	6.8251	5.11753	5.90395	6.00638	5.63229	6.07205	6.25125	6.54712	6.12322	5.52367	6.41437	6.45723	6.29581	6.45317	4.88048	5.68898	5.25673	7.52278	5.76556	5.65587
RNASEH2A	7.62325	7.73916	8.06665	7.8319	6.59262	6.3118	6.26871	6.06308	6.50114	6.44501	7.62579	8.6205	8.56898	8.9888	8.43057	8.48507	7.80779	9.81562	8.83778	8.34158	8.87186	8.13955	7.92582	8.79464	7.957	8.84889	8.92711	8.82603	7.81235	9.34038	8.60863	8.6287	8.78032	8.18174	9.07362	8.22469	9.36371	8.79622	5.92964	8.54841	8.77985	7.88878	8.68006	8.6633	8.23926	8.23869	8.35698	8.52985	8.98851
ST3GAL5	8.58119	8.33696	8.74747	8.44493	10.1033	9.83296	10.1026	9.81454	9.09201	8.83672	7.83763	8.31815	8.7294	7.65492	8.28467	8.41524	6.84413	8.22853	8.55842	6.45169	7.81491	7.92717	8.03981	7.33399	7.55225	7.80365	8.78951	8.22944	7.10956	8.27318	8.72875	7.97801	8.63706	8.75729	7.86829	8.3442	8.01926	7.66189	5.26854	7.90709	8.63966	8.28484	7.85314	8.52952	8.52772	8.5701	7.76594	8.84865	8.60324
SCRIB	9.13429	9.75415	9.28262	9.38796	7.65876	7.76492	7.62734	8.01909	7.52111	7.93187	9.30698	9.27395	9.18994	10.9257	7.41068	9.77896	9.16346	9.7027	9.26452	9.14898	9.10445	9.51999	8.1028	9.69935	8.52397	9.46274	9.06731	9.25298	9.02947	9.49039	8.7397	8.97424	9.66796	9.32729	9.0549	9.44009	9.59384	10.0013	9.43659	8.23719	8.59034	11.0263	8.74437	6.72619	7.54453	9.00528	9.55821	9.09222	8.88404
NTHL1	6.30664	7.00899	6.48261	6.60721	6.90809	7.44741	7.2467	6.90901	6.71208	7.61514	9.19438	8.19327	8.13991	9.23872	8.07849	7.81233	6.25252	8.37373	7.47064	8.18136	7.50815	8.53707	7.59714	7.21012	7.33687	7.93031	7.54529	7.44788	8.38845	7.47842	7.96653	7.68907	7.82249	8.46847	8.04519	8.60774	8.76674	7.72427	8.7405	8.03524	6.81377	7.43918	8.42711	6.13919	7.81166	7.63475	6.89903	8.05577	8.20441
MGME1	8.47425	7.77976	8.10354	7.83276	8.94602	9.02865	8.76999	8.70901	8.83656	8.66267	9.92966	8.96152	8.62984	9.67445	8.60399	9.62539	8.45539	10.2183	9.3796	10.9354	9.04094	9.56923	8.75688	9.71854	8.74066	10.4689	9.30659	8.8178	9.88761	9.24782	8.93008	9.22005	9.02639	8.89694	8.76615	8.27987	10.5008	9.96706	9.73555	8.97734	9.34917	9.11682	9.21217	8.53738	8.85687	8.05739	9.36399	9.15429	9.3499
COASY	9.44821	9.52432	9.02482	9.02025	7.76482	7.61404	7.3534	7.79087	7.81432	7.88837	10.3694	9.35837	9.17925	10.4511	9.24353	9.21841	8.71859	9.86942	9.3804	8.86488	9.27899	9.49005	8.9806	9.57462	9.23922	9.18187	9.56226	9.68248	9.25456	9.09241	9.37756	8.63908	9.32592	9.19292	9.10771	9.89231	8.92728	10.4317	7.17122	9.60134	9.60336	9.60769	9.2314	8.88253	9.19418	8.9251	9.55407	9.29257	9.23523
RBMS3	6.7483	7.06615	7.11391	7.33527	7.44809	8.40804	8.49201	7.88412	7.35545	8.03953	6.73355	6.03527	6.69207	6.81797	5.98558	6.21795	6.12935	6.17424	6.10207	5.77615	8.32977	7.01207	6.79188	5.28868	6.4786	6.2965	6.25265	6.7129	6.04987	6.57998	6.46622	7.09328	6.93742	6.64822	6.37872	6.25102	5.90868	6.95388	3.24734	5.73581	6.27231	8.50503	6.45632	6.68586	6.67459	6.91294	7.01332	7.15321	6.45672
GTF2H2B	6.32006	5.76621	6.21821	5.85527	7.77739	8.17388	7.30043	6.85912	7.23596	7.02816	5.18243	5.35716	6.20516	5.42546	5.61489	5.184	5.87309	5.61416	5.92271	5.98851	5.34099	5.74711	5.57158	5.24095	5.90505	5.90644	5.79113	6.40638	6.67842	6.40779	5.92384	5.26012	5.99159	6.87221	5.31224	5.63129	5.53727	5.49531	3.41727	5.70053	5.96713	5.92708	5.76888	5.70299	5.7682	6.22302	6.52095	6.36506	6.35094
CTC-471J1.2	5.1587	5.72771	5.65891	5.62198	6.53909	6.83781	6.46678	6.64229	6.38026	6.55731	4.39898	5.21526	5.50271	4.6644	4.59933	4.9973	4.98544	4.49697	4.33626	5.45848	4.45222	4.04816	4.92205	4.3636	4.93933	4.90512	5.17171	5.3378	4.20938	5.22696	5.32169	4.9067	5.10387	4.96144	5.22906	4.43417	4.05282	4.87376	4.11158	4.74782	4.98863	4.79595	4.00813	4.6273	4.9351	5.63058	4.61349	5.22322	5.56392
CD47	9.70276	10.0438	9.65017	9.56953	10.2713	10.3524	10.2527	10.3376	10.5047	10.0946	11.6955	10.6426	10.1542	10.7917	10.9623	10.7978	11.7936	10.5386	10.981	11.6885	10.8368	11.1817	10.2512	11.5983	10.9261	11.371	10.4522	10.5152	11.7361	10.6772	9.90974	10.5235	10.6499	9.98268	11.0176	11.2957	11.042	11.7417	10.1716	11.0306	10.2383	11.449	10.5167	9.72873	9.93173	9.80535	10.7451	10.1299	9.76549
TUBA4A	8.0407	8.32074	8.32196	8.06222	9.00328	8.80786	8.99365	8.73846	9.21856	8.88547	10.3145	9.5227	9.1037	10.1493	10.1236	9.95249	10.142	9.62523	8.80502	10.373	9.33775	9.67348	9.36848	9.49213	9.67526	9.78372	9.41407	10.0512	9.59734	9.43051	8.99912	8.94379	9.60553	8.71616	9.97391	11.0771	10.5086	10.8566	9.96098	8.95841	8.60337	9.73586	9.559	7.83159	9.20165	8.4533	9.39763	9.57048	9.0816
LINC00622	6.11147	5.82845	5.62132	6.55019	6.65885	5.75886	6.14058	8.23256	6.81092	6.08641	3.48088	3.42004	4.13704	5.53712	4.80126	4.1555	5.56244	4.84001	3.9172	6.06086	5.93184	5.32533	4.25781	5.20635	5.71396	6.48469	4.91542	5.37541	4.92102	6.14685	5.31476	5.63207	5.21965	4.44061	4.53687	4.6073	6.65179	6.65462	3.59864	4.71151	4.4826	3.96255	4.85084	5.64034	5.28042	5.30286	5.88574	6.35452	4.73915
USP18	6.49163	5.97378	6.27008	5.77671	6.30448	6.87168	6.779	6.991	7.06713	6.47126	8.24936	9.02001	8.12402	9.22023	6.73464	8.95023	7.0401	8.24441	9.05449	10.8985	6.51686	8.92627	6.4112	8.40418	8.84113	7.95253	7.88275	8.22566	7.07346	8.05272	6.93606	8.2245	6.43371	6.86285	9.68494	6.60286	6.62228	9.38307	8.84131	8.97495	7.5943	8.59429	8.41949	7.01861	7.01976	7.24861	9.32885	7.83348	8.58143
DNMT3B	8.88788	9.15656	8.72431	8.83651	7.27506	7.29227	7.28478	7.13969	7.27655	7.43493	8.46599	8.72614	8.3087	7.68496	9.13834	9.0522	8.78155	9.35878	8.69934	9.68434	8.71472	9.02784	8.29369	9.37453	8.38454	9.58226	8.84283	8.91767	8.57741	9.01572	8.36669	8.6225	9.07387	8.6053	9.12074	8.39916	9.5684	10.1661	6.90217	8.44912	8.71636	8.67475	8.78684	8.44676	8.46786	8.6644	9.21761	9.11163	8.89602
OR7E37P	9.88034	10.5367	9.81869	9.86326	7.24406	7.49814	7.34333	7.58374	7.65367	7.26013	9.07924	9.86839	10.0212	8.99184	9.87384	9.81378	8.87014	10.0196	10.2202	9.52917	9.97017	9.74822	9.91033	10.3043	9.76508	10.0092	9.94628	9.58134	9.29882	10.1021	10.5087	10.1392	9.79106	9.42433	9.98548	10.0334	9.78875	8.859	8.68104	9.83736	9.8968	9.19895	9.75677	9.87213	9.71217	9.84766	9.69477	9.68437	9.97916
OR7E19P	9.47463	9.02546	9.2597	8.74972	5.69498	5.34835	5.65448	5.40976	6.06638	6.0305	5.56453	5.46752	5.31115	5.36427	5.99868	5.50774	4.97042	5.38876	5.57814	5.85536	5.43339	5.59646	5.37027	5.6245	5.19806	5.55258	5.63567	5.40097	4.96867	5.5581	5.59026	5.98547	5.63719	5.40673	5.56721	5.67982	5.42662	5.87785	5.44185	5.06042	5.79962	5.70616	5.52005	5.49984	5.4403	5.38961	5.39438	5.52206	5.71348
CADPS2	8.72372	9.10832	8.90561	9.6907	9.76098	10.1182	10.2011	10.1978	10.2106	10.0637	8.28614	5.96486	6.07353	8.24501	6.25435	6.52364	9.41784	6.77692	6.20296	6.98079	7.32377	7.20782	8.27246	7.33689	8.38292	7.02493	7.01808	6.89899	9.00853	7.88294	6.71505	8.12301	6.36164	6.64112	8.67299	8.94021	6.01394	6.40639	6.24216	6.32036	8.90192	8.88171	8.47313	6.80607	8.40818	8.03433	9.0914	8.47589	8.23548
SLC6A12	5.87245	5.44075	5.96637	5.57828	4.82227	4.13419	4.65279	4.58807	4.90191	4.87862	7.29041	8.17018	8.51658	6.82903	8.17151	8.15708	7.75999	8.30482	8.15204	7.25774	8.00678	8.07436	7.99275	7.85204	8.11383	7.70265	8.27153	8.15612	7.7115	8.5736	8.2346	8.46401	8.3553	8.14614	8.45836	8.19543	8.26045	8.40747	4.19189	9.22862	8.55188	7.21533	8.04429	8.18384	8.31993	8.30612	8.17444	8.49885	8.35246
TACC3	7.28277	6.20434	7.26742	5.95665	6.82049	6.2646	6.97733	6.59648	7.14232	6.54708	8.56122	7.94832	7.13599	8.05681	9.42912	7.9185	8.48233	10.175	8.18252	7.84059	8.70789	7.26328	6.47542	8.85666	7.36256	7.99737	8.00292	7.48479	7.73058	8.11513	7.22131	7.2488	7.98173	6.45111	8.64175	8.60668	9.30041	7.9372	6.39479	7.64289	7.28733	7.39098	7.95198	6.18778	7.66967	7.38985	8.59613	7.85483	8.59505
LEMD1	7.02032	6.75643	6.92511	6.45575	6.61643	6.89509	5.97392	6.03147	5.97197	6.2092	8.43864	7.4818	9.26466	9.97404	8.18584	8.12158	7.07074	8.33643	8.07114	6.47163	8.46419	9.81987	9.94926	10.7397	6.5807	10.0055	8.10831	8.58108	10.567	6.15424	8.96216	7.79623	7.49412	6.67104	8.18042	10.1419	8.07732	9.92621	6.82887	7.19102	6.92869	8.99766	8.86405	7.14627	6.91451	9.44178	9.10414	6.57802	8.88441
SDC1	6.60308	6.43792	7.00087	6.42199	5.91034	6.1173	5.59866	5.92126	5.9533	5.92675	6.69537	8.19564	6.88573	6.48948	7.07853	7.27113	10.0793	7.48445	6.69081	8.5069	7.38658	7.37194	7.31745	6.91426	9.00228	8.63017	8.27852	8.10531	7.94636	7.53929	7.25731	7.07781	7.12434	7.87846	7.45245	7.03223	7.9873	7.3697	5.78871	8.17804	6.79224	8.21733	6.31827	6.68483	6.48209	7.71993	7.44246	8.32936	6.53914
TAGLN2	9.2807	9.70117	8.92134	9.08613	10.1575	9.44617	9.79716	9.61459	10.025	9.35724	10.8568	10.1983	9.63711	10.6655	10.1923	10.3504	11.3856	10.7098	10.2586	10.5261	9.90639	10.4994	10.5171	10.9668	10.128	10.2228	9.61423	10.4795	10.4756	10.2687	9.57547	9.89692	9.70009	9.31354	10.2664	11.6227	10.2552	11.3069	9.53736	10.6132	9.86358	11.1659	9.85811	9.20147	9.56232	9.38716	10.4187	9.88599	9.44497
STC2	6.54312	6.17679	6.77209	6.56403	5.44195	5.52576	5.78835	5.7229	5.21276	5.4909	6.8022	8.80142	7.67491	6.64237	8.17138	7.67396	8.14053	9.67522	8.29558	6.84185	8.12337	7.72891	7.62043	6.97857	8.27153	6.85594	8.9091	7.75004	7.22331	8.43802	7.73674	7.47357	8.40701	7.42951	7.98964	7.83174	6.77638	8.28653	3.94257	6.81927	8.22764	7.65925	7.71791	8.73813	7.88607	7.79062	7.29492	7.59151	7.73757
RP11-38P22.2	8.37724	7.68643	7.49259	7.27567	7.55011	8.80027	8.20572	7.36381	7.68748	8.75355	6.42684	7.60248	4.96483	5.6782	6.99837	5.57418	7.14765	5.83586	4.25118	7.95613	4.85201	5.03936	5.6453	4.68985	6.18336	5.75203	5.44855	4.0923	5.83162	7.30921	5.65256	6.80757	7.05634	8.11977	8.0901	5.83166	5.48737	6.40971	5.86085	4.50148	7.83757	6.62038	5.45512	6.288	6.89364	7.63951	6.24217	7.21706	7.79546
BICC1	6.81399	7.40404	7.22942	7.31788	8.34347	8.28587	8.4372	8.77309	8.02135	7.87297	7.57916	7.17282	7.27681	6.90861	7.39298	7.43475	7.13391	7.44657	7.50962	6.62252	6.93311	7.34521	7.11887	6.93657	7.51211	6.67702	7.83557	7.84101	6.70145	7.17875	7.37357	7.25199	7.34069	7.43205	7.18197	7.09995	7.16	5.81684	4.70858	7.10861	7.21051	6.76616	7.46233	7.74432	7.50922	7.65088	7.49984	7.75837	7.50124
NDUFB7	5.21635	6.04862	5.93294	5.65911	6.72155	6.76397	6.56366	6.62316	6.40067	6.80182	6.66357	7.72918	7.40384	7.56916	7.18595	6.80152	6.31728	7.55592	7.50703	6.41498	6.93178	7.25151	6.38465	6.8163	7.02449	6.74311	7.14015	6.71696	6.60316	7.57873	7.2556	7.08587	7.44222	8.52756	7.99879	7.18307	7.3097	7.43299	6.19759	7.81962	6.44503	7.6667	7.01008	6.55337	7.90951	7.35943	6.86844	6.8078	7.21924
HIST1H1C	6.28556	6.39369	8.33895	6.52554	6.53654	6.16052	6.82253	6.88999	5.79074	6.35012	8.04721	8.99846	8.14784	10.7597	9.76715	7.6266	8.25627	10.4219	7.80226	8.8189	6.49746	6.89569	8.42255	10.3291	6.94062	7.57284	8.34613	7.59425	7.43328	8.77721	7.60175	8.78957	7.77051	9.5314	9.36305	9.70777	10.6997	7.35768	9.08679	10.1891	7.41615	10.0603	8.0655	6.89045	7.09387	9.12443	8.44622	7.79684	9.16044
PART1	7.9783	7.50273	7.95517	7.58311	6.07038	5.89704	5.76397	5.82341	5.81861	6.09896	8.27143	8.04561	8.43352	9.19813	8.30857	8.50268	7.84102	8.25214	8.32473	8.22001	8.50779	8.08362	8.16394	8.52653	8.28987	8.33937	8.73216	8.42889	8.67773	8.18168	8.48124	8.20956	8.6758	8.20282	8.23179	7.72284	8.68085	9.04966	5.02908	7.86794	7.95984	8.39028	8.45082	8.48035	8.49239	8.88595	8.4512	8.34698	8.56186
TSLP	4.73002	5.14974	4.90479	4.91726	5.28435	5.18676	5.29711	4.75629	4.75592	5.19301	3.59029	2.87365	2.79182	3.11214	3.9805	2.78835	3.56882	3.59214	2.80012	3.59202	2.99546	3.44489	3.71883	2.87602	3.5414	2.97247	3.06294	4.25481	2.85752	3.5072	3.31311	3.9058	3.33634	3.23262	2.88652	3.86674	2.88799	3.05941	2.48615	3.74561	4.37203	4.01609	3.59523	4.79037	3.70394	3.21901	3.13978	2.84663	2.98662
C7	8.7401	10.7441	8.68475	8.66594	9.24237	10.3421	9.79774	8.32053	9.86388	10.9956	6.25985	7.72524	6.69717	10.1576	5.98687	5.89327	5.63398	5.93307	6.03296	5.43746	7.49445	8.51602	5.78301	5.55353	5.81498	6.75507	5.93792	5.83126	6.56359	5.64249	8.23819	6.40871	6.09547	5.54747	5.98319	5.65312	5.51691	6.82209	5.50812	5.66582	8.12389	11.5061	8.84489	7.79475	8.23619	8.54887	5.93438	8.15739	8.51905
POP7	7.16341	7.3846	7.22503	7.01938	7.92289	7.83537	7.91341	7.68756	7.92998	8.17793	8.21559	8.738	8.64572	8.75822	8.13578	8.40229	8.50896	8.99833	8.37764	7.88764	8.09701	7.93827	8.1013	8.64648	8.13486	8.62982	8.38858	7.56243	8.15656	8.07393	7.98934	8.20382	7.99391	8.31868	8.38358	8.54712	8.47042	8.19742	9.37254	8.42809	7.91116	8.84974	8.22111	7.8119	7.95082	7.95261	7.95653	7.99984	8.03215
ALDH3B2	5.42587	5.81292	6.39815	5.98258	5.57669	5.28528	5.54818	5.70839	5.58629	5.81704	7.20702	6.52732	7.21813	5.80079	6.83417	7.66692	6.44281	6.30297	5.64666	7.05832	6.03188	7.59104	6.05489	7.4534	7.4392	5.8203	6.54465	7.4775	7.10192	7.75801	7.86148	6.32208	7.61883	5.66612	7.92459	9.68099	6.31559	7.68642	6.73362	7.26523	6.5798	6.66284	6.38398	6.82095	5.86661	6.33815	8.33413	6.22778	7.02904
ATL1	7.64941	8.38797	7.27924	7.76599	8.46729	8.68306	8.93943	8.44884	8.6886	8.10292	6.46403	6.19993	6.74196	7.54215	7.44202	7.36649	8.25951	6.75033	6.59908	6.93451	7.06698	6.91512	6.2622	6.58585	7.65425	6.76114	6.44499	7.18396	6.15961	6.58771	6.28226	6.71211	7.15879	6.35925	6.67736	6.58643	6.89875	6.78428	4.97854	8.11828	6.85557	7.83505	7.41187	6.78081	7.30434	6.97089	6.84	7.35795	6.41821
CYP1B1	8.24044	5.18516	5.96562	6.06984	7.76073	6.40164	7.79977	5.91681	6.2243	5.51306	8.86078	9.32208	9.38883	7.92996	8.97187	9.16738	8.52482	9.12486	9.25435	7.8621	9.22574	9.39131	8.64637	11.6133	9.32864	8.77889	9.40495	9.33288	8.97393	9.14298	9.63474	9.0432	9.28419	9.04801	9.25759	8.30397	8.77215	8.70533	4.31473	8.44868	8.79443	6.84819	8.93343	9.0919	9.18512	9.06279	9.3033	9.90352	9.14974
DHRS7	7.86996	8.08513	7.37352	7.50519	9.13015	8.84521	9.07662	8.69778	9.1668	8.75787	8.21553	7.00637	6.65226	7.32073	7.7825	7.17367	8.04277	7.14348	6.25554	7.11858	6.82588	6.9653	7.15824	7.58415	7.28431	7.00668	7.42547	6.71932	7.34877	6.79543	7.06889	6.953	7.15234	7.48335	6.62352	6.65976	7.1608	7.59183	6.28391	6.32947	7.03182	8.72903	7.00165	7.24956	7.13833	7.02158	7.71611	7.42319	7.24135
NRTN	4.11941	5.10978	5.44003	4.45098	3.89417	3.73649	4.31258	4.33139	4.3906	4.49726	4.5983	6.87248	5.43489	3.99992	4.75076	7.80606	6.54505	7.62624	3.56812	5.8271	7.54849	9.0358	7.47083	5.39114	4.86711	6.92882	6.33062	5.15359	8.39962	4.2052	7.48881	5.45974	6.03123	6.17516	6.1366	7.20554	5.31821	7.24768	5.87723	6.84828	4.77745	7.46314	4.9602	6.68996	3.94371	5.01991	3.53891	6.28544	6.74168
DMD	7.17155	7.47056	7.36819	7.63483	7.59583	8.61643	8.03074	8.31422	8.79309	8.48366	6.30507	5.83466	6.47132	7.44353	5.57768	5.81648	6.3827	6.07027	5.66559	7.32183	7.06475	6.26095	7.29297	6.10041	6.1111	7.14865	6.18073	6.06399	5.79939	6.54471	6.49612	6.72246	7.28458	7.5816	5.86962	7.08412	6.43024	6.97497	5.00117	5.6919	5.96228	7.7598	6.80537	6.79685	6.79399	7.37418	6.47695	7.28999	7.77159
RAD54B	8.10575	8.34408	8.68115	8.3739	5.49115	5.64164	5.54765	6.33893	5.72793	5.19272	8.35097	8.82136	8.51024	7.51527	8.79672	8.40525	8.28389	9.25601	8.55047	7.5679	8.09463	8.40569	7.72832	8.29604	8.29368	8.34664	8.86434	8.38438	8.16955	8.55188	8.52035	8.15888	8.45226	8.68749	8.79965	7.47631	8.13749	7.3714	3.11384	8.27163	7.94592	7.08476	8.36086	8.06507	8.20949	8.33945	8.38756	8.47895	8.75333
TRIM24	7.63694	7.94561	7.51516	7.25326	7.67638	8.47285	7.72613	7.89663	8.05994	8.32222	9.80642	8.55265	8.33321	9.58614	8.31605	8.47488	10.2498	8.75176	8.41692	9.78335	8.65881	8.65696	8.63936	8.72422	8.70905	8.71589	8.58691	8.14086	9.0637	8.63761	8.16672	8.75128	8.34128	8.81651	8.47836	10.1538	8.98401	8.54654	8.26425	8.33527	8.31541	9.96814	8.62713	7.79248	8.07094	8.31162	8.7049	8.34029	8.30789
BBOX1	4.33181	4.32638	6.04475	4.75198	4.45626	5.84836	6.32944	5.77241	6.70605	6.76718	9.98616	10.6632	10.6421	8.54996	10.3694	10.6466	9.75622	10.4963	10.3046	8.91991	10.1258	9.86307	9.87861	9.67313	9.91029	9.4523	10.6208	10.2982	10.0525	10.7939	10.4432	9.46988	10.2788	10.6541	10.5227	9.85801	10.2878	9.57775	9.60169	9.80976	10.0667	5.96003	10.1042	9.90185	10.172	9.90441	10.336	10.2915	10.2955
SORL1	8.94096	8.94167	9.47206	8.57903	9.93257	9.83873	9.99804	8.76985	9.07568	9.02393	11.5637	9.84302	10.0467	11.3537	10.5913	9.89761	10.0285	9.99936	9.93606	9.85135	9.57507	11.3536	10.545	10.1678	10.1024	10.0053	9.47693	9.80573	11.2869	9.60394	9.57076	9.5029	9.35613	9.32598	9.06554	12.3659	10.2579	10.4506	9.74183	10.8734	9.39082	11.4308	10.2035	8.7151	9.57314	9.1513	9.05595	9.75294	9.90512
MRPS17	7.19734	7.92903	7.69556	7.47831	8.52069	8.35401	8.53135	8.43218	8.70775	8.47583	9.31474	8.77132	8.62972	9.72958	8.74149	8.86989	8.41631	9.07932	8.84567	9.4097	9.16507	8.64271	8.93219	9.15702	8.52707	8.85727	9.14944	8.51123	8.59887	9.32169	8.17942	8.73497	8.68614	8.94708	9.3427	8.74366	8.90057	10.5495	7.59072	8.10381	8.71806	9.51473	8.82543	8.99338	8.49675	7.91647	8.76401	8.13279	9.00476
JADE3	6.94343	7.4172	7.62906	7.01127	7.32204	8.52106	7.38532	7.28477	8.37853	7.89632	9.02132	8.23272	8.36353	9.08472	8.90916	8.68847	8.78476	8.83479	8.75391	9.26687	8.54578	7.89205	7.89951	8.17504	8.10372	8.92173	8.82473	8.63017	8.16276	9.06577	8.28025	8.89255	8.56021	8.58397	4.65297	8.98468	8.8063	9.47913	7.36659	7.83037	7.89197	8.90498	7.55168	7.54552	8.04379	8.19787	8.50119	8.69676	8.85252
LOC101928886	7.38478	7.60142	7.67346	7.50318	5.92465	5.80427	5.67898	5.80764	5.60634	6.02241	5.13429	4.89008	5.5341	5.22504	5.19318	5.2392	4.73568	5.316	5.40824	4.80968	5.03167	5.06102	4.79519	4.53631	4.98902	4.75214	5.27427	4.90134	4.96005	4.93923	5.10783	4.70593	6.86239	4.83955	5.12561	4.57535	4.58948	4.74483	2.25879	4.7398	4.81563	5.40811	5.17247	5.36949	5.51114	4.86541	5.04626	5.49409	5.05066
OR51B2	5.35414	5.11226	5.38126	5.215	5.06799	5.01428	5.19845	4.80441	4.85153	4.89814	8.66644	8.94292	8.92683	7.70979	8.86762	9.17923	8.97303	8.89344	8.91668	8.25948	8.74339	9.01301	8.79457	9.03398	8.8394	8.66357	9.07067	8.94039	8.94079	9.10757	9.04039	8.65382	9.06589	8.92615	8.97968	8.51101	8.75158	8.33348	5.41726	8.59877	8.65109	7.3842	8.84208	8.75815	8.75391	9.12694	8.76805	9.00232	8.97808
DCAF12L1	5.46017	4.82757	5.72265	4.7921	4.48303	6.12239	4.39047	3.38611	4.0308	4.78147	7.64308	8.48741	8.80802	8.03075	8.10961	8.5035	7.59317	8.67254	8.68175	7.43753	8.62134	8.49129	7.90342	7.67563	8.05706	9.37469	8.92221	8.25629	8.53759	9.14471	8.49367	7.89484	8.85952	8.55728	8.53399	7.22889	8.49407	7.65747	-0.509138	8.301	7.98786	6.7033	8.47796	8.38622	8.58957	8.89124	8.40485	8.45064	8.62055
TOMM40	9.12059	8.9314	8.93382	8.80915	6.89871	6.71339	7.075	6.93577	7.74865	6.83581	9.23622	8.57219	9.11325	9.56255	8.459	8.8205	8.15544	8.86827	8.95534	8.30705	8.80095	8.88499	8.44137	8.69034	8.74015	8.62654	9.07032	9.00486	9.04004	8.88447	8.81941	8.43223	8.92438	8.73152	8.74452	8.25448	8.52966	8.31154	7.78614	8.30105	8.5503	9.74315	8.86343	8.68041	8.61658	8.88303	9.18258	8.84571	9.08879
ABCA6	6.85282	5.74737	6.21881	5.96138	6.3618	6.1637	6.65629	5.5769	4.73102	5.83241	5.11609	4.71151	5.44866	5.14349	4.38094	5.31325	4.54668	4.91303	5.33811	4.76988	4.72565	5.3261	5.20455	4.99734	5.60664	4.83862	5.86791	5.38486	5.27571	4.93159	5.92113	4.84826	5.45501	6.03435	4.58955	5.54341	4.6561	4.6846	2.21223	5.50794	5.2534	5.01443	5.21979	6.37765	5.31356	6.54457	5.23952	5.89242	4.98399
PNPT1	9.39716	9.64309	9.40264	9.22946	8.23078	7.17595	7.40037	8.40888	7.87676	7.27788	9.92588	9.78417	10.0827	8.95889	9.32347	9.24787	8.78675	10.0894	9.93785	8.93749	9.57394	9.2727	9.22609	9.16681	9.44572	9.35063	9.52135	9.73051	9.52902	9.57389	9.55953	9.3113	9.43569	9.57237	9.82855	8.81805	9.67287	9.08657	7.46198	8.65502	9.04018	8.95384	9.52841	9.30231	9.92162	9.03458	9.81186	9.52334	9.37075
CIB1	7.85661	7.79116	7.59281	7.53341	8.58351	8.14984	8.37281	7.98121	8.66318	8.05285	10.9318	9.50037	9.09128	10.8465	9.7412	9.76695	10.2903	9.28434	9.64753	9.80392	8.96385	9.07746	10.1603	11.1485	9.67794	9.30672	8.43595	9.26128	9.88258	9.05982	8.56545	8.85487	8.86883	8.7497	8.92576	10.9696	9.56585	11.1294	7.51356	10.0938	9.2385	10.388	9.17598	8.05173	8.96034	8.37415	9.28066	8.47532	9.14099
CTPS1	6.31006	6.7	7.02187	6.89359	7.2283	7.08205	7.20694	7.23848	8.01752	6.74796	7.76388	8.33748	7.39835	7.71814	8.37707	8.49614	8.15876	8.67528	8.0375	8.10534	7.54474	7.59396	7.06509	8.10106	7.34147	8.19823	8.39943	8.07521	8.92324	7.82535	7.06049	7.76122	6.90765	6.3363	9.39612	9.21394	8.84058	9.15391	6.94741	7.90238	8.68894	8.63737	8.11129	7.34078	7.84378	8.21301	7.92628	7.31645	8.76926
VPS37D	6.26574	6.80608	6.89471	6.80034	6.99821	7.06399	6.79636	6.71684	6.72143	7.02968	10.3282	10.2656	10.2413	9.61276	10.5047	10.1442	10.4042	10.3185	10.2087	10.0248	10.1369	10.2921	10.0006	10.1846	10.3273	10.1995	10.2598	10.5393	10.2796	10.284	10.3499	10.2192	10.1356	10.2547	10.1919	10.0964	10.1348	10.3776	5.49606	10.2985	9.95908	9.66994	10.5436	9.9655	9.90803	9.70527	9.90199	10.1023	9.81433
RBM10	9.05104	10.3724	9.45671	9.42903	8.56441	8.80483	8.4964	8.28662	8.81791	9.24312	10.3436	9.69739	9.61614	10.1597	9.7004	9.6912	9.83576	9.6324	9.666	9.67851	9.61522	9.31065	9.66782	9.67349	9.43094	9.98252	9.73492	9.20563	9.44573	10.0465	9.66744	9.80255	10.0903	9.81622	9.72947	10.3872	9.94282	10.8187	8.35143	9.75837	9.90382	8.99525	9.20609	9.47437	9.25294	9.37274	9.54243	9.70691	9.70147
RNF144A	5.32118	6.01306	5.82007	5.24882	5.66365	6.2003	6.13041	5.47945	5.52079	6.01181	8.02425	6.68982	7.27165	7.49364	6.43986	7.22144	7.40933	7.85271	7.00399	8.50134	6.92802	7.83874	6.56086	8.00941	7.73508	9.23305	7.60237	6.82379	6.68141	7.68109	6.64719	6.61815	7.12584	6.80374	7.23649	6.83541	8.62456	8.22897	6.60775	7.69952	6.7842	6.74599	7.66297	6.81303	6.90328	6.90748	7.36326	7.34111	7.23723
MST4	9.3955	9.95382	8.73507	9.3664	10.7596	10.733	10.861	10.8779	10.877	10.3617	8.89877	7.85009	5.7462	8.07816	8.36452	7.54933	7.95255	7.68837	7.27608	8.54748	7.90942	6.16571	6.83994	7.71194	7.60729	9.00009	8.20489	8.03333	7.7456	8.83302	7.51163	7.72518	7.81897	6.97407	8.07695	10.6586	8.43962	8.90368	7.61056	5.84478	7.9176	6.08486	7.7277	8.60896	7.73229	7.3676	7.85746	8.42579	8.76961
HIST1H2AL	2.97554	3.55287	3.78705	4.10733	2.64553	2.01539	1.8688	2.92792	3.19287	2.96729	4.96403	4.90648	5.5258	5.26836	4.3126	4.97341	4.7261	5.05324	4.51216	4.34065	4.58262	4.11347	4.39111	5.35691	4.83024	3.9846	4.88106	4.90802	5.11367	4.96539	5.4963	4.85874	4.95786	3.97133	4.86059	4.43971	4.9719	5.45684	1.01482	4.89637	4.24706	4.10632	4.60791	5.45719	4.07194	5.43322	4.20427	4.69355	5.42082
HIST3H2A	7.09658	7.70737	7.56257	7.41966	7.56695	7.63637	8.02712	7.68036	8.00433	7.98583	8.49492	8.62545	8.68009	10.6986	8.26162	9.18231	7.67665	8.47504	8.00004	9.48871	7.8869	7.67022	8.47557	8.92639	7.37195	9.12094	8.09478	7.66958	7.65927	8.42881	7.96277	8.32598	7.9211	9.04766	8.40956	9.95271	9.69611	10.4821	9.3944	7.5178	8.83231	9.41811	8.40332	8.28936	8.07177	8.50191	8.04543	8.27202	8.47869
MRPS26	7.53169	7.67974	7.45726	7.31061	7.89648	7.79458	8.07776	7.77657	8.29887	8.32294	9.1975	8.40362	8.64116	9.48987	8.0278	8.67311	7.51276	8.84068	7.84777	8.88007	8.24099	8.39634	8.24479	8.61414	7.80324	8.83753	8.44276	8.08175	9.17627	8.82393	8.13487	8.3988	8.33488	8.19432	8.23356	7.95159	9.5594	9.23779	8.19421	8.68316	7.59236	8.71429	8.43334	8.05112	8.53029	7.58555	8.6955	7.70284	8.09908
SLC16A4	5.98657	8.26017	7.27613	6.80206	8.86354	9.2456	8.74815	9.56567	8.36739	8.46054	3.74603	4.76198	4.7497	5.78308	4.82944	6.74677	5.42583	4.09104	4.54711	4.9643	5.18215	4.88055	4.19625	4.54967	6.33356	4.96607	6.0104	4.37619	7.9062	5.62098	6.18125	4.92638	4.9862	4.57704	5.46725	7.77029	4.41542	5.05765	3.3397	5.0719	4.70772	7.52123	6.00801	4.55502	5.71249	6.54685	4.77915	6.67157	6.8196
YARS2	7.2951	7.64725	7.27424	7.38964	7.74049	7.95828	7.95123	8.1144	8.46535	7.91095	8.5163	9.14044	7.71171	9.20531	8.37789	9.07582	8.00379	8.9711	8.42168	8.78616	8.87801	8.11008	8.29772	9.12213	7.90301	9.27589	8.73674	8.85893	9.84927	7.42538	7.61317	8.25429	8.25563	8.41245	8.71429	8.90249	9.10715	9.81327	7.71202	8.22256	7.87112	8.37492	8.08115	7.67912	8.80207	8.14317	7.50049	8.36661	8.41744
GNL2	8.60538	8.41074	8.30532	8.70543	9.08242	9.36427	9.38276	9.52576	9.60791	8.78702	10.6514	9.43291	9.14063	10.1435	10.0222	9.80824	9.95261	9.70429	9.66887	9.88931	8.75216	9.51623	8.73443	10.1346	9.26658	9.45344	9.78151	9.28381	10.5993	9.93593	9.18515	8.73157	9.04192	9.13295	10.7361	10.1802	10.0757	10.2918	10.6747	9.3009	9.79837	9.99783	9.05932	8.25567	9.58512	8.29921	9.38581	8.96515	9.6122
ZWINT	8.15387	7.21737	7.82473	6.96041	8.18795	7.66877	8.13389	7.75072	9.07854	7.77903	10.3248	10.035	7.96187	9.18456	10.1792	10.1165	9.80546	9.97982	9.15196	11.3493	10.0258	8.87471	8.0178	11.6663	9.29473	11.2309	9.83736	8.881	9.71413	9.42629	8.42237	8.54615	9.52742	8.28803	8.77643	10.1156	11.3459	10.5103	8.01371	9.55147	9.79691	7.75827	9.64388	7.43698	9.20275	7.93384	9.85881	8.77998	9.65383
LIPA	11.0562	9.55874	8.52535	9.00675	12.0641	10.5768	11.7964	10.5647	11.5215	10.2244	9.47671	9.46872	8.87074	9.77461	9.08455	9.26636	9.6306	8.27679	9.16356	8.73879	7.99099	9.5186	9.44228	8.29762	9.34994	8.85758	9.03124	8.26388	9.1615	8.44178	8.91816	8.6643	8.83158	8.7733	8.61158	9.02055	9.02898	9.35984	8.88768	8.68692	9.20498	9.20841	8.73472	8.76078	8.81887	8.20474	8.46485	9.43886	8.18959
LINC00629	3.26957	2.61587	2.64517	2.21259	2.94172	4.14062	2.86678	3.65873	3.65887	3.25818	5.03422	5.25649	5.82454	5.70387	5.4793	5.41977	5.31817	5.28278	5.74779	5.2998	5.31921	5.00151	5.72236	5.32941	5.45486	5.33482	5.12865	6.12135	4.79201	5.77981	5.55833	5.44078	5.71919	5.91193	5.57106	6.02972	5.61515	5.17091	3.04395	5.80623	5.34562	5.38095	5.80303	6.2033	5.62937	5.95195	5.22962	5.93887	5.23277
SIGLEC11	6.79749	7.80221	7.6658	7.33386	6.78747	7.85447	7.03653	5.62968	6.61314	8.56315	5.56256	6.28147	6.79652	5.56427	6.60033	6.97914	6.08259	6.23796	6.68656	5.33704	6.42355	6.61997	6.60427	6.10559	6.36638	5.8634	7.00531	6.48113	6.106	6.60694	6.91478	6.81742	7.0512	6.39327	6.54699	6.27003	6.54119	5.92532	3.05899	6.47542	6.76894	7.00659	6.42973	6.65706	6.63828	7.13666	6.64645	6.68142	6.8895
IL18	9.76102	8.99775	7.87413	9.14402	10.4828	10.2098	11.198	10.7722	10.0507	9.1061	7.02463	6.55673	6.52409	6.77609	6.68407	6.52049	6.17669	6.42487	5.62189	7.38713	5.07876	7.11684	5.80126	6.4884	8.40486	5.53038	5.84677	6.72103	6.06676	6.90653	6.6482	6.97243	6.23037	6.42594	6.54841	6.65437	5.83596	7.37684	6.94079	6.7706	7.75219	6.40479	7.79678	8.12186	7.61546	8.52326	7.0758	7.50263	6.85904
SPATC1L	5.18062	5.51345	5.27522	4.71916	5.83187	5.07147	5.76759	4.78032	5.17662	5.35789	6.13518	6.04479	6.14151	6.75127	5.78904	6.20289	6.16139	6.78137	5.38115	6.49094	5.83567	6.12483	6.31678	6.15898	5.69502	6.15764	5.82207	5.25757	6.05712	6.41286	5.73529	5.7295	6.098	5.92187	6.23741	5.97704	5.51023	6.77135	4.84489	5.80726	5.28184	5.44773	6.27019	5.50468	5.79829	5.30976	5.95775	6.30371	6.76521
IMPDH1	7.25216	7.31416	7.80469	7.56513	7.87865	7.30832	7.44552	6.71955	6.87068	7.07956	8.63856	9.05233	8.99209	9.18699	7.00478	8.10402	9.07608	8.43878	8.89427	8.88286	8.08725	8.62042	8.275	7.77738	8.09903	7.62319	7.5002	8.55311	7.75343	9.18926	8.24328	8.55998	7.97968	8.23661	7.86172	9.42106	7.80154	8.85549	8.25338	8.6017	7.09309	9.92399	7.2909	8.48956	8.83094	7.48136	8.43924	8.04195	7.96429
MROH1	7.28956	7.29277	7.46389	7.31668	6.41223	6.06075	6.24532	6.15758	6.15177	6.34998	7.08716	7.67736	7.48979	8.09061	6.67615	7.20528	7.49167	7.57555	7.53598	6.02789	6.68267	7.07048	6.77965	7.77475	6.83544	7.2961	7.09577	7.69949	6.99837	7.47782	6.98477	7.26238	7.51008	7.41587	7.50929	7.93706	7.00726	7.61541	6.98844	6.84042	7.05959	8.27109	6.66263	6.71226	6.37257	7.70127	7.69875	6.88327	7.18964
ATG101	7.80592	7.85341	7.78724	7.76176	8.02931	8.05708	7.66703	7.9281	8.82135	8.3999	9.77018	8.54821	8.76468	9.54216	9.39694	8.71775	8.20982	9.16079	8.78677	9.95437	9.314	8.73438	8.85488	9.40375	8.74893	9.92785	9.05354	8.21695	9.98665	8.55733	8.44456	8.12496	8.49424	8.20892	8.94739	8.90318	9.84586	8.88772	7.68195	8.38808	8.23888	8.24051	8.79137	8.50569	8.41745	8.16017	8.17561	8.06768	8.82645
WNT7A	6.74051	7.07419	7.34776	6.88741	6.04202	5.81151	5.91728	5.9532	6.01156	6.54387	7.14691	6.67357	7.21068	7.82345	8.0647	7.24988	7.27108	7.73908	7.07531	8.38259	7.20142	8.28604	7.2491	7.88804	7.92082	7.75314	8.52092	7.98841	6.41337	8.09932	6.54893	7.79146	8.03833	7.05484	6.81848	6.79614	7.75867	7.7514	7.10828	7.13087	7.59576	9.33575	8.14707	7.26706	7.31253	7.20715	6.70172	7.10948	8.30091
LSM4	7.52396	7.79331	7.65348	7.32686	8.08263	7.93318	8.08993	7.98634	8.17871	8.13203	8.80682	8.72681	8.49532	9.75888	8.75989	8.76637	8.86657	9.02318	8.90357	10.0409	8.71936	8.93373	8.09797	9.7811	8.78446	9.28306	8.41376	8.71697	9.71953	8.96791	7.94753	8.35657	8.44476	7.8777	8.84794	10.3927	8.21203	9.53428	8.14776	8.79189	7.82897	8.83735	8.55769	7.99362	8.71022	8.12226	8.49646	8.24523	8.62862
DUS1L	7.77248	7.85206	8.16794	7.9095	8.47977	8.6983	8.58011	8.14815	8.34612	8.65827	9.72709	9.04363	8.71978	10.2804	9.1063	9.02929	9.69921	8.48848	8.58066	8.91558	7.98989	8.375	8.52349	9.77133	8.46963	8.75298	8.63436	8.586	8.42812	9.29361	9.29804	8.50693	9.22213	8.68438	8.98671	9.92699	8.70259	9.37058	6.38184	8.73012	8.62063	8.72973	8.45046	8.41389	8.55688	8.79759	8.4259	8.33122	9.15249
KRTCAP3	7.2773	8.13052	8.27083	8.14897	8.61067	8.6806	9.01089	8.32767	9.22861	9.16603	11.6341	9.99343	8.92789	9.87166	8.77696	9.31573	10.6417	9.01839	9.32765	9.67207	9.20499	10.3356	10.7224	9.708	8.54855	9.97693	9.01268	8.79807	9.38625	9.26448	6.53976	8.74128	9.23085	9.4195	8.61075	9.95766	9.32285	10.7404	9.15252	9.76567	8.58369	10.4723	9.32334	8.8695	8.77848	8.31605	9.35447	9.4033	8.63565
PDIA4	8.1587	8.0701	8.16242	7.88189	8.56599	8.82971	8.44723	8.84357	9.22391	8.72843	10.7062	9.23243	9.14694	9.55593	9.31929	9.20859	10.4627	9.31291	9.92806	10.2491	9.20555	9.20637	9.29096	9.47608	9.219	9.87915	9.2177	8.60403	10.6446	9.14565	8.8974	9.27435	9.2728	8.9811	9.16142	9.97595	9.30348	9.29137	8.27081	8.36236	8.189	10.0633	9.0721	8.40329	8.17909	8.5341	9.70248	9.1893	9.13226
PCSK5	6.60325	7.65037	6.94048	7.25374	8.42653	8.47997	8.13377	7.60899	7.85084	8.3068	4.7842	5.4236	4.82564	6.29483	5.91324	5.87229	6.19896	6.15228	5.33342	6.84369	5.86847	6.26233	5.30322	6.21909	7.89573	6.0831	5.83139	6.15032	4.34425	5.9493	6.59699	5.77306	5.6508	5.11927	5.70254	7.77734	5.76376	5.21262	4.63474	4.33622	6.31237	6.44143	5.27144	4.78569	4.69141	6.05134	6.04567	7.31459	5.68671
CLIC2	7.94117	6.37514	6.09888	5.65764	8.06734	7.02188	7.97042	6.5702	6.62587	6.63888	5.53555	5.48926	5.65615	5.71951	5.96444	5.98348	5.41733	5.54962	5.11659	4.9724	5.55391	5.25153	5.13957	5.49762	6.5059	5.01827	5.83155	5.83039	4.92548	4.9916	5.53115	5.62018	5.24013	4.96186	5.95094	4.67253	5.07476	5.3362	2.17467	6.18464	6.30665	5.19793	4.90907	4.79	5.33195	5.99957	5.52878	6.22479	4.35052
GIMAP2	8.71098	8.01856	6.72942	6.70892	9.16845	8.26463	9.19268	8.38958	7.90283	8.19243	6.55941	5.97538	6.2608	5.78193	5.93085	7.26351	6.7654	4.48418	5.72919	5.14253	4.9101	6.41778	5.72218	5.72519	7.37268	4.29502	6.38819	5.67464	7.57873	5.80474	6.80085	5.81484	5.54124	4.42639	6.65314	6.45811	4.89088	6.55583	5.32483	6.25572	7.50384	7.39069	5.47083	5.31009	4.97368	6.56078	5.64353	7.49492	4.49539
PDZRN4	5.62419	5.43197	5.96629	5.73081	7.46982	7.05327	7.53279	5.9699	5.29246	5.95106	4.79808	4.94946	4.84658	4.35039	5.7669	4.66319	4.51808	4.65853	4.60813	4.86789	5.20045	4.17889	4.77992	4.52372	4.78141	5.06977	4.28325	4.73294	4.3455	4.62856	4.53232	5.35023	4.52031	7.2463	5.12109	4.68801	7.14866	4.73714	2.79608	4.52498	4.55175	4.62108	4.25472	4.2391	5.29268	5.60987	4.52182	4.5713	4.71331
OTUD1	9.4408	10.1866	9.2939	9.3935	8.88606	7.66611	7.63149	8.89399	8.44574	8.62453	6.68866	6.5481	7.08935	7.1566	7.61359	7.58712	7.06108	6.99087	7.17901	6.25466	7.58017	7.01521	6.69982	8.40277	7.30617	6.97386	8.12552	6.90135	6.88048	7.07595	7.31758	7.06313	7.66139	7.15885	7.52025	7.29609	6.83657	6.88631	6.03031	7.57476	6.85165	7.01989	7.64951	7.35734	7.1664	7.36467	7.2465	7.12657	6.71294
XK	4.99626	4.30075	5.84798	4.48741	4.35091	4.73766	6.39075	5.06203	4.32994	4.78762	6.26848	6.31038	5.42595	7.88621	6.74518	6.44456	5.39375	5.41145	4.79161	6.91481	7.85747	7.91553	5.84247	8.10752	6.59093	6.26521	5.70697	7.33039	5.91274	7.64734	6.55701	7.25955	6.91568	5.63402	6.61474	8.88322	6.02158	7.93999	5.51695	8.20968	5.62482	4.72561	5.38389	6.04443	7.38364	6.02053	7.44063	7.46492	8.86179
DDX21	9.73615	10.226	9.80767	9.8388	9.60104	9.56544	9.58622	9.61266	10.0859	9.31792	11.1906	10.8225	9.88686	11.1958	10.3789	11.0006	10.9899	10.2365	9.99063	11.8413	10.2306	10.808	10.6218	11.2871	10.8511	11.1425	10.1332	10.0445	10.8523	10.0367	9.6336	9.72022	10.1003	9.9459	10.1177	11.2839	11.694	11.9191	10.0335	10.5989	9.93796	10.8141	10.2979	9.53435	10.1611	9.45462	9.42947	9.60664	10.0468
GPSM2	6.77778	6.31769	6.98065	6.63087	5.71406	5.11271	5.71448	5.8995	5.79382	5.32417	7.18967	7.56302	7.44695	6.00634	8.00762	7.64536	7.93564	7.9658	6.98033	8.04854	7.04953	7.10362	6.44297	7.38815	7.36668	7.38305	7.75963	7.13877	6.44002	7.78426	6.93095	7.0585	7.53274	6.66222	7.81421	7.11771	7.91543	7.20234	4.81161	7.13045	7.04715	6.71832	7.01998	6.67822	7.10872	7.07753	7.19759	6.88308	8.02484
TMEM109	8.6388	9.66768	8.51249	8.67749	10.6818	10.6394	10.3697	10.3598	10.4762	10.5862	8.24298	8.30421	7.68198	8.37673	8.02304	7.96563	8.54413	7.75139	7.94214	8.16271	8.18942	8.31612	8.16158	7.93509	8.21306	8.05225	8.04104	7.5759	8.37346	7.94934	8.29182	8.03918	7.68221	7.63314	7.71012	8.04696	7.90965	8.09445	6.82002	7.85689	7.84337	8.31621	7.89262	8.20439	7.96597	7.99063	8.00129	8.34686	7.93854
KRT23	9.02975	9.29868	9.32403	8.93624	7.58571	5.47984	6.08513	6.59532	5.55565	5.9623	10.5189	8.7365	8.71012	9.2584	8.9905	9.56302	8.93679	9.26213	8.62964	7.6228	8.37452	10.0304	8.60741	9.18478	9.77117	7.82491	8.64425	9.27964	9.31943	8.74262	8.89495	8.65286	8.56741	8.74626	8.61879	10.1286	7.78092	10.7379	6.29694	8.41527	7.7813	9.86265	8.89171	8.60244	9.1724	9.41574	9.48316	8.90078	9.30825
PRR29	6.79231	6.25653	6.22597	6.09502	6.15825	6.37667	6.04977	5.71277	6.32772	6.3617	7.60109	7.34407	7.52871	7.57577	6.429	7.3925	7.65715	6.93578	7.2339	7.64208	7.39842	6.74302	8.23796	8.52688	7.22817	7.55135	6.78194	6.97613	8.10529	7.49045	7.27165	7.68469	8.00292	7.54918	7.65953	8.06023	7.55496	8.01956	3.73736	7.88293	8.39941	8.10338	7.99266	7.95754	7.38443	7.35498	7.09779	7.39697	7.52191
LOC101926907	7.69934	7.03351	7.27659	7.36407	5.28185	5.17776	4.94175	5.41556	4.94112	5.22249	7.83248	7.55299	7.61835	7.73837	7.51599	7.57724	7.83794	7.86371	7.78975	6.97594	7.67165	7.7085	7.06188	6.79898	7.53633	7.34391	7.77003	8.02655	7.19145	7.60486	7.53634	7.23589	7.53557	7.75055	7.36035	7.13129	7.13441	6.88298	4.80794	7.22532	7.17083	7.1282	7.64219	7.51008	7.55921	7.85008	7.85088	7.60806	7.99385
LINC01144	5.94124	6.19754	6.83196	6.54323	5.18109	5.13289	5.1655	5.25403	5.01888	4.85232	8.15363	7.8619	8.21963	8.01473	8.2548	8.09825	7.99597	8.20047	8.11759	8.14635	8.23145	8.13759	8.06688	8.44626	8.10225	8.4783	8.07215	8.23157	8.15399	8.05368	7.99574	8.12819	8.07108	8.2096	8.24061	8.57187	8.39428	8.85697	5.21742	8.50574	8.62409	8.37545	8.12072	7.93033	7.94965	8.02259	7.94254	8.04745	8.0876
NUMB	6.89089	5.9847	6.03492	6.19382	6.80601	7.6323	7.28532	7.10768	7.33428	7.15696	5.35601	5.79249	5.06149	5.19122	5.45366	4.74583	5.99837	6.0288	5.94706	5.3834	5.27716	5.28201	5.29159	4.58361	5.10744	5.0471	5.2718	5.56467	5.28048	5.35768	5.79687	5.12389	4.66588	7.03397	5.64353	4.84947	4.74782	4.8116	3.84398	4.77694	5.83622	6.37286	6.02821	5.5319	5.75456	5.08259	6.46897	5.52851	5.8258
KCTD1	8.19914	8.68366	8.61089	8.22295	6.95713	7.44278	7.09661	7.0076	6.80299	7.36035	8.62074	8.87715	7.7598	8.64099	8.702	8.71587	8.18762	8.91219	8.89745	10.2357	9.0173	8.87698	8.40774	9.49568	9.07278	10.2927	9.26197	9.35706	8.86555	8.72011	8.93043	9.23217	8.79577	9.54608	9.28319	9.05635	8.81729	10.2769	8.73091	9.59895	8.342	9.19984	8.91771	8.05749	8.53225	8.35202	8.72236	8.57749	8.61197
OR7E14P	6.07434	5.91403	6.23041	5.74843	4.87459	6.24594	5.08968	5.26771	5.82266	6.17811	7.2732	7.56772	6.78485	6.81243	6.81695	6.81675	6.71248	6.08971	7.91678	6.73769	6.30494	6.32316	5.81636	7.45329	7.35294	6.28469	6.65519	6.94809	6.04848	7.85689	6.70183	6.45961	6.45134	5.82419	6.79646	8.70528	5.94162	6.77555	6.17489	7.64037	6.76124	6.27216	7.50335	5.89494	6.95373	6.91854	7.37306	6.00575	7.08793
NAA10	8.9423	9.54143	8.95364	8.95765	7.16538	6.72267	6.594	7.03011	7.25628	7.35167	9.58333	8.83696	9.17869	7.56524	8.94361	9.08865	8.22416	9.05101	8.9724	7.69287	8.69758	8.66824	8.67242	8.40139	8.82313	8.45747	9.13761	8.67677	8.49625	9.12066	8.73929	8.76213	8.98134	8.89071	9.04755	8.6726	8.69287	7.71418	7.12486	9.08597	9.16407	7.25597	8.90723	9.13382	8.82197	9.04664	8.90388	9.10349	9.1874
NDC80	6.83727	5.72171	7.11782	5.29269	6.27409	6.56119	6.04669	7.42513	7.18595	5.83104	7.77557	8.74315	7.10863	6.26722	7.50483	7.99385	9.43893	8.71094	8.13404	10.5841	8.46371	7.44942	5.87761	9.08861	6.77926	9.03158	8.0908	7.37877	8.20848	8.67563	7.12461	6.84765	7.65571	6.2682	9.47509	7.97583	9.31864	8.80809	6.9059	8.24388	8.01646	7.34085	7.5032	5.82464	8.07217	5.89261	8.65781	8.17828	8.84614
PRR34	6.2745	6.41507	6.39942	6.40317	6.25521	5.8238	6.19698	6.14345	5.93457	6.19034	8.21232	8.27817	8.38714	8.06493	8.18184	8.15879	7.59535	8.36745	8.18215	7.50428	8.33346	8.36632	7.96251	7.75016	8.35648	7.76322	8.45801	8.49349	7.76523	8.29122	8.38233	8.1877	8.42995	8.38718	8.15601	7.74679	7.97684	7.73472	5.39264	7.9211	7.82129	7.70814	8.34209	8.52713	8.47746	8.2764	8.68918	8.31787	8.55945
COMMD7	8.54986	8.69803	8.57234	8.4533	9.47482	9.24207	9.17238	8.98005	9.18528	9.12493	9.9727	9.38829	9.32325	10.0344	9.3582	9.78074	10.0893	9.75992	9.36878	10.6979	9.59572	9.47859	8.98963	9.49497	9.11511	9.74958	9.19988	9.22067	9.82206	9.22135	8.87536	9.04091	9.48981	9.07665	9.01463	9.84708	10.0743	10.6701	9.12081	9.12213	9.08003	10.5253	9.20828	8.79617	8.6778	9.14035	9.52818	9.07832	9.00648
CCDC96	6.12721	6.02563	5.81094	5.9197	5.91604	5.75071	5.63722	5.74066	5.90606	5.94837	8.40427	8.10178	8.44507	8.26965	7.72062	8.45871	7.41565	8.5459	8.23849	6.96544	8.24567	8.01087	8.45954	8.12259	8.23587	8.01862	8.56465	8.4694	8.11711	8.47025	8.20495	8.15742	8.41435	8.45549	8.27774	7.76946	8.18269	7.83805	3.06706	8.06575	8.37773	9.05158	8.77733	8.41287	8.44343	9.15806	8.9784	8.5474	9.08498
IL4I1	8.45006	7.3314	8.21631	7.07074	8.78906	7.30469	6.73241	6.39955	7.69152	6.46793	10.0887	9.04585	8.70111	8.87073	8.76537	9.40529	7.24681	7.24803	7.99682	7.44111	6.53538	8.08828	8.00322	9.04441	8.35431	8.65636	8.09041	9.78006	10.7907	8.93079	8.62484	8.35661	9.52013	9.33145	10.2103	10.1369	8.02934	10.6614	5.69353	10.596	7.79971	8.51678	8.20595	6.99974	8.21002	8.36571	8.89546	8.5757	8.03009
BRIP1	5.65283	4.98277	5.52181	5.17837	5.42965	4.98581	5.64708	5.63179	5.64748	5.16877	7.29908	6.293	5.73832	6.76506	6.0992	7.48778	7.74303	6.95236	6.45421	7.88154	7.09727	6.01625	5.63958	7.94105	6.68462	8.46276	7.8706	6.41574	6.7638	6.95149	6.57741	6.70897	6.83105	5.69959	7.30366	7.74627	8.05673	6.5763	4.38598	6.62381	7.44283	5.98928	8.07095	6.10027	6.45499	6.79184	6.8044	5.92355	7.60206
ENHO	10.0637	10.3388	10.0511	10.0073	7.50309	6.85923	7.20708	7.29818	6.77566	6.94326	6.99804	6.20494	7.46708	6.72676	6.08993	6.9475	6.36972	7.27891	6.3296	6.62097	6.47572	6.37159	6.62186	6.52799	6.39912	6.60549	6.45896	6.28322	6.52851	6.16253	6.29044	6.33574	7.07054	7.62419	7.01423	6.41464	6.92601	6.79439	5.97083	6.51702	6.88975	6.57625	6.87555	6.70737	7.27097	6.78086	6.8309	6.68917	6.88373
RCAN2	9.08298	9.57944	8.81828	8.91432	7.85304	6.80191	7.06692	7.62652	7.22096	7.36327	6.70934	6.72764	7.31536	6.80345	7.09897	6.94455	6.72353	7.12929	6.82269	6.38996	7.15653	7.29263	6.68239	7.15869	8.08621	6.91785	7.69417	7.39939	6.3469	6.74257	7.40649	6.46632	7.52235	7.26395	7.03646	6.38038	6.33516	6.24879	3.26426	6.60064	6.58128	6.72128	6.98156	7.43144	7.25142	7.73528	7.35916	7.11852	7.38195
RUVBL2	9.76267	10.2968	9.50374	9.57552	8.56221	8.06225	8.08625	8.2329	8.14225	8.33351	10.4177	9.97113	9.71882	10.2742	10.0157	9.76133	9.96421	10.1732	9.79065	9.97153	9.7557	9.9084	9.95591	9.78088	9.83761	9.99366	9.89055	10.2083	9.95239	9.95741	9.59929	9.4834	9.54204	9.80406	9.68222	9.48844	10.0413	10.7039	7.21609	9.73541	9.62197	9.37357	9.75824	9.43829	9.65666	9.52439	9.60065	9.71046	9.78142
LINC01133	6.65983	7.11201	6.85323	7.07575	8.24057	8.34468	8.44745	8.3508	7.81087	8.39495	5.8491	7.20696	6.3948	7.72279	6.21827	5.80573	7.35093	6.49967	5.67969	5.74207	6.03774	6.15683	5.966	5.22398	5.69837	5.45028	5.96144	5.84126	5.06121	6.94737	6.88958	5.50781	6.95085	6.27381	7.02615	5.82598	5.86128	6.38586	4.78343	7.05223	6.11201	6.29172	6.8697	8.00025	6.71255	5.80451	5.88583	6.48269	5.47234
TMPRSS3	8.73816	9.18631	8.77607	8.73056	8.05924	8.73319	7.7791	8.20483	8.52188	8.80082	10.3871	9.38786	9.49163	9.53428	9.96757	9.69164	9.77196	9.23112	9.18803	8.76476	10.4374	9.95079	10.3318	10.5548	8.99945	9.69799	9.03341	9.25847	10.4272	9.60767	8.99821	9.17925	9.27654	9.52484	9.19062	10.4669	8.6594	9.49389	9.97729	9.4518	9.53907	9.07945	9.46583	9.13588	9.32971	9.2964	9.45526	9.19119	9.04097
CFH	8.46503	9.95578	8.87523	9.5898	10.6982	10.4572	10.7711	10.935	9.95868	10.9319	6.87563	9.02086	7.3219	6.77985	8.57605	6.82559	8.00097	5.92832	6.16008	6.77377	6.85635	6.48268	8.91207	6.26292	9.02047	5.89128	6.63253	7.14699	6.86661	8.22463	8.71161	7.40996	8.72302	6.04422	7.84884	9.98772	5.57676	5.79929	2.89692	5.70813	6.74993	8.01392	7.09837	6.66273	7.34728	8.72612	8.68322	9.27485	6.49954
GJB1	6.88569	6.85625	6.79352	6.9485	6.29804	6.39858	6.34733	6.21514	6.25427	6.54329	7.93972	6.89281	6.72386	8.7811	8.09155	8.66726	6.63518	6.96712	6.77797	7.14113	6.85716	8.30554	8.2742	7.54037	7.23035	7.55816	7.56842	7.96016	8.74005	6.88756	8.05463	7.7156	7.37346	6.45988	7.67793	8.07682	6.50515	8.47576	7.81156	6.99616	6.88511	6.49229	7.97628	6.96955	7.425	7.73202	7.63023	7.82324	8.40874
CKB	8.1516	8.48293	9.07057	8.43192	7.03286	7.67373	7.0669	5.94788	6.70631	7.14355	8.69801	8.75654	9.11421	10.2249	8.65081	8.83184	6.98636	8.90462	9.04191	9.50132	8.65044	9.05091	8.51538	8.75927	8.55685	8.4386	9.18852	8.87251	8.39275	8.70835	8.58134	8.4527	9.37972	8.84439	9.04339	7.91813	9.33136	8.19524	8.75571	8.51881	8.12036	8.61083	8.83227	8.66381	9.04386	9.20893	8.5986	8.6725	9.25493
HIST2H2BE	7.65898	7.59069	8.10742	8.05374	6.73721	6.27199	6.44438	6.69341	6.84274	6.75161	8.54495	8.57965	8.28773	9.05007	8.55078	8.26948	8.05778	9.37259	8.47789	9.27977	8.43167	7.72149	8.78893	9.2125	7.56626	8.38285	8.78701	8.31218	8.31405	7.46922	8.46588	9.17349	7.7409	9.23026	8.02628	9.42313	9.25121	8.40308	9.25543	8.00912	8.5508	7.29415	7.95728	8.56989	8.20022	8.25417	8.1729	7.89603	8.5483
HSPA2	9.48711	9.75971	8.86197	10.1774	10.5909	10.6373	9.82359	10.6041	11.5776	10.1498	6.90552	9.10579	8.99137	6.74192	8.63281	9.24631	8.24509	10.1329	8.19216	8.6705	9.04499	8.79821	7.40499	9.74381	9.66735	7.76173	9.24695	8.83038	7.09919	9.22038	6.65285	8.87793	8.74801	7.46328	8.23846	9.36375	9.50405	10.3986	7.16789	6.44259	5.76235	8.4794	8.48185	6.47176	7.77296	7.07741	8.43282	8.28427	8.39087
CHD7	6.73127	6.605	7.0081	7.13329	7.55252	7.7401	7.56487	7.09399	7.83228	7.60259	7.91395	8.0739	7.44564	8.3541	7.80759	7.80978	7.32412	8.61287	8.31582	9.25614	8.97546	8.69734	7.40873	9.79028	7.67347	10.14	7.9949	8.25958	8.87992	7.7518	7.9223	8.25337	8.11743	8.71003	8.16652	7.75129	8.64466	9.09345	7.71531	7.9082	7.69567	8.18096	7.74873	6.85493	9.08329	7.49781	7.86686	8.04401	8.30644
SPC25	6.4289	5.99457	6.1654	5.27301	5.322	4.79622	4.31749	4.66002	4.75448	4.715	6.47004	7.13911	6.04574	6.73609	7.1185	6.70994	6.55824	7.06237	6.84702	6.41304	6.38421	6.15673	5.4241	6.29109	6.45891	6.27273	6.53446	6.76382	5.71019	6.84691	6.80487	7.54266	6.32524	5.45249	6.61664	7.13689	7.05639	7.56755	2.70028	6.70271	6.68341	7.37445	7.43597	7.17971	7.53904	6.88868	6.41186	6.40182	6.65996
SNHG18	6.15097	7.08531	6.43934	6.35437	7.57165	6.9159	7.58566	8.05669	7.6293	7.33733	6.08393	5.65813	6.47308	5.93436	6.30123	6.19665	5.70229	6.11021	5.87488	6.97061	6.00584	5.67154	5.93459	5.84627	6.33628	5.66836	6.44806	5.63252	5.58253	6.20895	5.5721	6.90944	6.37061	6.87702	6.57447	6.81656	6.30642	5.75979	4.16356	5.65734	6.34896	6.28695	5.98302	6.02715	6.12647	7.03276	5.7946	6.35323	5.59143
FLJ36848	5.57888	5.58301	5.77517	5.71694	6.627	6.71772	6.53291	6.521	5.90018	6.34243	5.527	5.34266	7.41882	5.23339	5.20623	5.67959	4.81725	5.57277	5.29762	4.7898	4.80328	5.03652	5.38261	4.83433	5.25065	4.56337	5.38013	5.2413	4.9918	7.4468	5.55907	5.02803	7.46091	7.28246	4.74288	4.83317	4.83133	4.44206	4.57442	4.29108	4.61991	4.84902	4.70447	5.71871	5.0133	4.8071	4.26216	4.37847	4.87119
PLS1	6.92547	6.6733	7.81539	7.27657	7.10226	7.29026	7.06765	7.66451	8.0024	7.00315	7.79164	9.64594	7.35947	7.93397	9.15693	8.51998	10.2186	8.40781	7.40024	8.45898	7.69186	8.56934	8.88227	10.2125	7.49975	8.7853	8.3728	8.50686	8.29476	8.05938	7.26326	7.00772	7.89412	7.56784	7.15881	8.88567	8.84876	9.66453	8.01834	7.81162	8.02516	9.32781	8.22582	8.05414	8.11559	7.76985	8.54507	7.5826	7.96055
PAXIP1-AS1	7.154	7.63263	7.35538	7.04776	8.27098	8.57128	8.72549	8.46662	8.3411	8.67593	9.63481	8.41768	9.04933	10.2564	8.78208	8.95656	10.2018	8.28524	9.68408	8.87686	9.29301	8.45297	9.20809	9.2877	7.25854	8.31898	8.50018	8.55309	9.7188	8.36057	9.31461	8.69669	7.2694	9.404	8.19582	10.0243	7.67856	9.68142	9.56231	8.45981	7.90872	9.30843	8.7681	8.68256	7.61711	8.45384	9.18292	7.96626	9.09803
CPSF3	7.86405	7.96334	8.22521	7.99385	9.134	9.03718	9.08924	8.91822	9.02054	8.77496	10.3735	9.45903	8.82651	10.601	9.11005	9.3433	9.8825	9.43005	8.95147	9.65892	8.83831	9.4223	9.19417	9.26293	8.6926	10.049	9.23763	8.8664	9.52968	9.06564	8.48488	8.74679	8.88365	8.95491	9.1607	9.76275	10.5033	10.2215	8.25804	9.16407	9.03825	9.61908	9.26316	8.54161	8.82434	8.57643	9.21431	8.63	8.73043
BC039487	4.80017	4.25909	4.52522	4.37123	4.69578	3.87968	4.66875	3.60013	3.98302	4.33183	2.77325	2.80966	1.91522	1.42793	1.42793	2.77325	2.25728	2.27499	0.986795	2.09423	2.45132	2.89868	3.6111	2.77325	2.11762	2.90999	3.08128	3.03449	1.09155	3.13909	1.34221	2.23915	2.30628	3.98774	1.08028	1.76233	1.76233	1.51649	2.67919	1.77498	1.62243	2.54313	2.09353	2.95634	2.46674	2.32333	2.38191	1.08028	3.16904
OLR1	5.26154	4.98145	5.55692	4.87501	6.92659	6.51406	6.57737	5.83219	6.54826	4.57274	4.508	4.19584	3.55761	3.94006	4.27428	4.36735	4.08348	4.16566	3.73019	4.17169	3.81928	4.05106	3.52517	3.87009	3.73885	3.66353	3.97708	3.78466	4.00714	3.57385	4.16438	3.89104	3.79661	3.6542	3.77527	3.77594	4.37959	4.61009	4.08694	4.07279	4.15669	4.09914	3.29987	3.63947	2.61529	4.29344	4.08204	4.83622	2.6469
KLF5	9.12037	9.55554	9.17059	9.49231	10.0301	10.3006	10.3665	10.4352	10.5794	10.2753	11.1727	10.1053	9.27055	11.3922	11.1423	10.5239	11.7245	10.6039	10.3312	12.19	10.9725	10.8685	10.9594	11.6286	10.5007	11.7642	9.7348	10.4236	11.5591	10.3564	9.55613	10.2645	9.81923	10.1618	9.94156	11.3559	11.4123	11.8259	10.5899	10.9726	9.17864	11.775	10.2199	9.02913	9.91473	9.12447	10.5463	9.84838	9.69244
SPON1	8.86197	9.50252	9.05784	8.61021	9.27192	9.3317	9.48081	10.293	9.69754	9.34537	12.3334	8.65197	10.4909	11.6694	10.6883	10.6962	10.5181	10.8592	9.47583	12.5127	10.7705	10.8363	11.3138	11.8831	10.3804	12.2374	7.91143	10.9647	11.9993	9.21047	8.79955	10.2958	9.8604	8.69993	9.95635	12.1966	10.8024	11.9374	10.4305	8.20484	11.3494	10.5693	10.6594	7.53134	9.44171	9.46675	11.0393	10.3114	10.1604
LOC100130331	8.9723	9.21151	9.34758	9.16159	5.4874	5.04241	5.562	5.90097	6.08583	5.23401	5.35801	5.71505	5.12078	5.44488	5.09927	5.28892	5.61153	5.45597	5.20838	5.45038	5.22444	5.32435	4.97731	5.81615	5.47105	5.03991	5.24638	5.3163	5.59277	5.54243	4.98973	4.86393	5.4674	5.50918	5.63133	5.13759	5.58374	5.73283	1.03987	5.13165	5.14578	5.35211	5.74433	5.69293	5.79955	5.90984	6.05185	5.80428	5.54168
NUSAP1	7.44912	6.11871	7.72079	6.26213	6.95718	6.62287	6.73123	7.11656	7.66152	6.17852	8.85334	9.28203	7.66687	7.30418	10.1185	9.06922	9.96394	9.33631	8.25523	9.45597	8.86548	7.7411	6.6896	9.5438	7.79332	9.64329	8.6712	8.44136	8.98582	8.14784	7.43977	7.36496	9.05259	7.79616	9.07275	9.48533	10.2989	8.88214	5.5447	8.44516	9.2881	7.36534	8.6144	7.31038	8.32722	8.08829	8.66829	8.27987	8.77426
SLC4A4	8.18889	8.95975	8.10251	8.40286	7.81962	7.7245	7.58284	7.61243	6.90522	7.22609	7.03162	7.18049	7.2604	6.37544	7.40184	7.20893	7.25409	7.59479	7.28798	6.30998	7.41614	7.2757	7.16417	6.98767	7.1382	7.223	7.32471	7.36044	7.17246	7.3662	7.23721	7.40401	7.28222	7.40651	7.31436	7.07877	7.20238	6.68552	3.75195	7.38113	7.32129	6.95756	7.25251	7.25409	7.2056	7.28891	7.25312	7.46577	7.29703
TACSTD2	8.50651	8.81698	9.3619	8.77328	8.01573	8.73189	8.12536	7.56372	9.39566	9.26211	11.0994	10.1916	9.47874	10.3854	10.3745	10.5331	11.8585	9.60974	9.70909	9.95466	9.60827	11.2424	10.8908	11.4658	9.67974	10.3718	8.59297	9.09383	10.4305	10.1631	8.91818	9.41242	8.6037	9.31956	9.04372	11.7889	10.3495	11.605	10.5285	10.5713	8.7517	12.0219	9.76249	8.82186	9.04421	8.19868	9.34546	8.83393	9.47978
MGC70870	9.00073	9.68576	9.52902	9.33307	9.95199	10.1294	10.0785	9.74566	10.2813	10.2981	11.5093	11.3555	9.90299	11.6444	10.1874	10.6318	11.3378	10.3321	10.0047	12.2733	10.5756	10.8881	10.5602	11.4245	10.71	11.339	9.89078	10.2439	10.7172	10.2675	9.72378	10.219	9.9702	10.0829	10.1256	11.1074	11.5681	11.7421	10.3616	10.7762	9.72484	11.9566	10.2932	9.39269	10.099	9.59772	9.86993	9.81464	10.0171
PPP1R16A	7.80647	8.07563	8.64566	8.02394	7.9301	8.50676	8.24566	7.59049	7.49756	8.10446	9.13777	9.63164	9.01066	10.9736	7.7669	8.7926	8.6208	9.12233	8.31237	7.85949	8.43153	8.83433	8.54811	9.49353	8.25833	8.53948	8.87264	9.03876	8.70591	9.48943	8.81501	8.53562	9.59154	9.67468	8.16649	9.0719	8.52357	9.43968	9.61743	7.65448	8.13412	10.1147	8.19367	7.92294	7.53462	9.0022	9.40107	8.73026	8.94952
LOC100289361	6.37657	6.32584	6.8615	6.50878	4.97396	5.15708	5.66787	5.09644	4.98481	5.40082	7.54779	8.21186	8.35216	7.00357	8.10551	8.27103	7.34097	8.29577	8.21109	6.97207	8.3511	7.99393	7.91632	7.79074	7.99991	7.41967	8.52125	8.21781	7.64772	8.3202	8.36705	8.20955	8.24138	8.09407	8.25361	7.64353	8.10037	7.59575	5.13707	7.89239	7.94295	6.85328	8.30854	8.45929	8.17541	8.40808	8.21353	8.14392	8.42526
PBK	4.71022	4.13387	6.54353	5.42895	6.07542	6.28113	6.46549	6.64192	6.90143	5.24965	9.08476	8.41981	8.09583	6.42702	8.28112	7.2259	6.84486	9.28023	6.88318	8.76615	8.37752	6.16136	6.19702	10.0343	6.52565	10.0165	8.2899	6.48968	8.45314	8.02333	5.85528	7.62584	7.89822	6.8706	8.73836	9.36045	8.94172	6.91538	6.59153	9.30275	9.35376	6.67141	7.16449	5.5328	6.56719	7.12198	9.12133	7.2565	8.27667
[truncated: 727 more rows]
[truncated: 63 more columns]

## Sheet: TABLE  S3
All the DEGs
ID	logFC	AveExpr	t	P.Value	adj.P.Val	B
ITLN1	-5.37876	7.36359	-25.2315	1.09532e-48	2.37191e-44	99.5805
LINC01105	-3.29555	5.36207	-24.3097	4.04275e-47	4.37728e-43	96.1011
[truncated: 1,800 more rows]

## Sheet: TABLE  S4
GO of down-regulated DEGs
[truncated: 575 more rows]

## Sheet: TABLE  S5
GO of turquoise module
[truncated: 548 more rows]

[truncated: 1 more sheets: TABLE  S6]
